# Supplementary material for: Human Endogenous Retroviruses (HERVs) and Mammalian Apparent LTRs Retrotransposons (MaLRs) Are Dynamically Modulated in Different Stages of Immunity
Source: Biology (Basel). 2021 May 5;10(5):405. doi: 10.3390/biology10050405 (PMC8147956; doi:10.3390/biology10050405)
Supplement: Supplementary file 1 [file biology-10-00405-s001.zip › Sup_file_1.xlsx]

## Sheet: TPM values
Vargiu ID	locus	SRR7869590	SRR7869591	SRR7869592	SRR7869593	SRR7869594	SRR7869595	SRR7869596	SRR7869597	SRR7869598	SRR7869599	SRR7869600	SRR7869601	SRR7869602	SRR7869603	SRR7869604	SRR7869605	SRR7869606	SRR7869607	SRR7869608	SRR7869609	SRR7869610	SRR7869611	SRR7869612	SRR7869613	SRR7869614	SRR7869615	SRR7869616	SRR7869617	SRR7869618	SRR7869619	SRR7869620	SRR7869621	SRR7869622	SRR7869623	SRR7869624	SRR7869625	SRR7869626	SRR7869627	SRR7869628	SRR7869629	SRR7869630	SRR7869631	SRR7869632	SRR7869633	SRR7869634	SRR7869635	SRR7869636	SRR7869637
4444	chr17:35500762-35508355	78.4928	90.919	94.093	63.0902	73.7263	95.2377	85.6413	70.8156	0.184713	91.6394	87.9522	82.8179	0.0922833	77.3878	82.2243	65.964	0.877152	97.9204	96.2662	94.3872	1.36295	98.62	86.0776	76.2091	0.767895	79.5622	77.6707	71.2619	1.23386	86.5553	109.826	106.437	1.74694	83.4404	86.5552	79.0226	94.4956	93.4748	122.785	90.6994	101.915	82.768	83.4836	78.1198	62.2677	70.969	66.8942	86.7797
2384	chr6:158611703-158621178	45.0513	60.896	61.106	30.8237	50.8507	54.7938	58.8549	41.1619	0.45754	74.2175	63.4404	49.9762	0.394428	42.184	65.1457	40.5978	0.930366	63.7434	76.564	80.6818	1.79616	81.5362	82.5258	69.138	0.436725	81.373	77.4004	64.9133	1.5731	87.6086	79.5353	113.68	1.51863	75.7844	72.4004	55.5263	65.1218	73.121	84.1436	58.388	70.5987	62.9282	70.6226	50.9403	38.9802	59.7987	50.4448	86.735
3698	chr12:9832951-9837802	81.1402	132.246	61.4916	30.417	58.5467	45.9191	69.0591	35.9815	1.4455	60.6258	62.4348	29.9961	1.44435	65.5155	95.4454	25.8868	2.90722	64.7984	49.055	46.2747	7.63211	47.2835	85.9025	49.8462	4.22587	50.1859	47.5171	39.2987	8.6024	72.4827	126.06	75.6186	2.82687	47.6913	59.9536	31.3406	43.4743	34.3129	46.7472	16.7076	39.6964	45.9353	35.4931	19.5892	58.0659	116.991	108.989	51.854
4796	chr19:58305729-58315116	48.4926	47.8907	52.2656	48.8351	55.7758	52.0396	57.7297	52.928	1.49415	58.5071	54.8286	51.9977	0.696718	45.9231	56.2682	53.3323	1.7947	50.6406	57.2708	61.8968	6.7865	47.5633	56.3974	49.6948	4.92916	45.9494	49.1677	47.4031	6.2153	64.9619	54.0879	76.5895	8.14335	55.6962	49.945	50.8056	63.3091	66.5832	70.5433	79.3755	63.2663	52.5479	61.6849	63.2768	52.4783	45.0191	50.341	51.0487
2453	chr7:30572445-30579657	56.0544	60.26	63.5334	48.6957	50.517	59.0126	60.4218	44.1048	0.159112	54.4353	58.1332	45.1296	0.210509	56.5756	62.1762	51.556	0.162968	58.0516	61.341	56.6459	1.17985	50.1441	56.7546	37.8158	0.860614	52.5348	52.6732	47.4764	1.38761	53.8163	57.6595	56.09	2.61855	55.4417	61.9146	49.2941	47.6505	62.3137	56.7739	42.1258	71.3698	63.4884	71.6259	55.6698	58.7608	67.788	60.1521	55.1267
1658	chr4:153690317-153693920	55.1718	43.5344	49.9746	29.4942	31.9611	34.1553	39.3108	25.5041	0	29.3733	33.242	24.6903	0.356492	34.5092	67.0149	34.0978	0	29.3433	41.2762	40.9416	0	48.0907	52.3283	31.449	0	56.9363	50.2442	43.4498	1.06359	15.0613	11.8232	16.8065	0.436727	33.3402	48.6881	47.1329	44.1834	92.6308	33.1858	32.4814	75.2425	52.0257	74.8942	80.7476	57.0156	54.2405	50.1423	37.9931
4618	chr19:11942587-11948985	39.7934	47.4586	43.2717	36.6416	46.4725	46.1441	39.5715	35.0712	0	52.139	44.9336	40.1464	0.0912641	40.6728	42.5915	38.9099	1.10219	45.0385	47.358	39.8419	1.32993	45.5461	49.1415	36.7221	1.02888	46.0344	43.0102	45.3753	1.06493	44.267	54.2428	49.0945	2.03804	42.323	45.7404	38.2539	38.0703	44.6305	46.1521	39.8657	47.417	44.3516	47.8288	36.5494	37.1415	46.0941	39.3028	36.0502
4849	chr20:49281128-49287343	27.9986	29.4832	33.7139	22.999	32.1152	30.4757	33.2838	27.7019	0.0820587	69.0991	31.2507	45.7361	0.0375804	26.6563	32.7236	40.0158	0.535802	34.8692	45.4018	53.4466	0.81405	43.7318	31.933	35.2707	0.211835	49.0035	37.3993	43.1936	0.61666	58.4121	25.2064	57.0205	0.759636	58.1424	34.9971	47.3356	54.2287	72.8678	59.2795	62.0606	73.6675	39.6498	54.5482	92.3883	28.1186	29.6968	28.4023	42.3202
6095	chr1:169683482-169691301	32.4491	29.112	30.2427	41.2123	37.7344	31.2861	37.9597	46.7873	3.48966	25.5766	23.1992	34.5549	5.00357	28.15	37.7989	42.9155	11.5745	30.7019	35.8175	33.4191	15.2945	21.4636	35.779	30.4884	9.40547	24.6658	29.1139	26.7681	21.4043	24.6737	34.1126	21.1985	29.8174	29.7706	33.9801	37.6896	27.5558	28.4049	25.837	27.1121	35.4267	27.2947	36.228	35.268	40.9664	29.4278	35.9415	24.4103
2334	chr6:130192281-130199095	33.5304	54.4284	28.4042	14.8289	42.0196	36.2375	34.5821	21.5887	0.0187116	32.0221	38.7377	13.9423	0.274218	31.5432	28.6119	9.63158	0.804931	42.8485	31.1832	19.1514	0.742499	40.9589	49.5933	25.7869	0.165614	35.0612	43.2745	20.8545	1.03118	39.0884	51.7784	29.6403	1.68268	29.6841	33.3456	18.4311	23.8512	18.2423	23.3429	8.23509	25.6381	31.6659	21.2762	12.0271	27.8994	43.2805	38.6145	25.9316
2518	chr7:64679995-64686561	22.3211	27.6396	24.2223	13.8876	30.818	38.4819	28.5598	24.1308	0.0776727	17.838	14.9856	11.8277	0.231216	13.3721	9.58255	11.2729	0.268498	36.1246	37.7974	30.252	1.47103	33.1294	24.8848	18.0439	1.14579	26.4557	22.9664	19.047	1.03769	33.8964	20.2093	32.5249	2.46526	38.4528	23.7635	25.6785	36.5295	37.5314	41.0813	38.2847	33.0794	36.5729	31.7269	41.1435	21.3378	20.7995	15.7248	27.7326
4332	chr16:3079068-3081318	12.7877	19.1337	14.7687	17.7938	29.7653	27.598	28.1728	22.4056	0.5665	23.1288	26.8014	22.1104	0.415104	37.7758	36.8151	27.1868	3.39434	24.3368	22.8468	23.1115	2.35013	29.7855	33.3658	26.7018	2.42344	27.9554	21.9782	26.5694	2.17589	21.8851	24.4508	17.5097	2.89681	10.8428	17.2518	12.5222	20.9465	22.4007	23.3853	22.1619	32.038	30.0357	29.5317	22.2982	28.3755	40.0136	32.9264	22.7736
5387	chrX:53160069-53162218	19.9797	21.259	20.9428	12.4676	35.2191	31.2131	30.7514	25.4014	0.0593113	31.0764	35.6229	21.1616	0	22.5474	28.8569	16.2979	0.091123	27.2526	34.3975	20.9426	0.10698	25.2447	23.8006	12.2474	0	24.6026	22.5638	22.1344	0.297144	20.1551	22.9156	23.5893	0.209165	22.486	25.0865	15.0656	28.856	27.2944	28.4444	20.5662	34.7703	30.3497	25.9387	28.0645	17.5027	20.7165	23.0466	15.5296
2519	chr7:64834895-64840158	24.9018	26.4662	20.705	13.7548	27.2874	27.6825	24.0091	18.9354	0.0242248	25.0557	29.9121	19.0531	0.0221884	25.2874	23.909	14.0633	0.409396	35.4741	29.7938	20.7485	1.26713	27.0334	21.4019	18.2148	0.21441	23.9953	18.5229	20.4632	0.323637	23.2231	27.2354	18.9941	0.897017	24.1639	26.5718	19.1175	24.9073	16.433	22.5001	14.8615	23.2234	24.1197	16.0186	14.6578	27.8423	35.4435	26.3407	22.0397
4720	chr19:38823108-38837433	22.535	21.9039	17.5951	22.1306	26.0114	22.8062	21.1288	23.8312	3.17774	16.6869	20.6977	20.7922	3.63624	25.3233	22.8911	22.6335	7.49414	22.977	19.225	19.3677	14.546	22.0315	18.7238	22.0767	10.2288	22.2492	27.7945	21.7492	15.3851	18.8175	18.094	16.0827	14.1259	20.903	15.913	20.0037	22.0861	16.6278	16.7242	18.9939	16.2481	23.9538	16.1318	15.7291	25.0924	28.0506	23.0197	18.2213
3656	chr11:121632566-121643491	23.3462	16.2104	19.3345	29.7504	20.7071	14.6708	20.006	26.1394	0.922023	11.9126	11.7874	19.1412	1.57144	15.3471	16.4268	24.979	3.38896	16.001	20.9674	24.5871	6.6101	16.2387	25.0413	26.1436	4.90675	16.3184	14.4192	25.1034	8.53685	18.6198	25.5121	25.7027	12.6153	20.1477	22.0496	20.7068	18.7382	20.887	18.7756	20.9354	16.2331	11.4047	16.2517	18.7667	20.9821	16.7592	23.59	21.9469
1745	chr5:1577341-1585389	17.6611	15.8345	17.2529	12.7469	26.113	22.7255	28.5538	22.3203	0.0316857	24.5794	22.4329	22.9225	0.0725555	12.3416	16.7375	14.6544	0.559825	21.3652	27.0361	23.3968	0.914423	18.1897	24.4045	17.1041	0.397299	20.3949	15.1573	21.5323	1.42868	19.7214	24.2086	22.1436	1.84374	23.967	26.9378	20.0289	16.5975	22.1962	19.7161	15.0016	27.3529	18.1671	23.6681	20.7976	22.884	20.8434	18.1578	20.4057
1045	chr3:101692114-101701253	24.4681	25.7251	26.4735	20.4281	27.8663	28.9495	27.3107	23.2803	0.0976624	17.2784	19.8488	16.9961	0.217243	21.3457	24.6792	20.6267	0.385827	28.2484	31.2957	25.2641	0.931097	20.7591	24.2456	18.5697	0.411618	12.0734	9.30158	11.7502	0.97856	15.6206	17.5796	19.3736	1.74666	24.0333	27.8532	19.9917	21.3136	22.1149	23.122	16.281	27.0067	19.9552	21.5263	20.1846	18.3647	18.3555	18.3138	13.7634
3704	chr12:10360361-10370314	15.3934	17.6608	13.3169	11.0503	26.8784	28.5083	29.6409	25.2441	0.0640543	14.2092	21.4925	15.1517	0.222945	16.8058	14.024	10.6847	0.570777	24.9812	22.8013	17.9105	1.0167	28.8672	34.0784	29.0703	0.812608	15.7588	22.1485	16.4101	2.3961	14.6182	37.9917	13.5676	1.55865	18.3899	26.2979	16.6181	11.5513	4.27964	11.821	4.84083	17.8182	19.9819	7.61954	11.1043	19.7977	24.9087	20.6647	20.9051
3949	chr13:40874210-40881161	19.4288	18.586	15.375	19.6334	21.4539	20.1887	21.2849	21.0344	0.550284	18.3479	19.9411	18.838	0.0336018	14.3463	15.9364	15.2985	0.28181	21.3104	23.4767	20.2619	1.38956	18.5013	20.3012	18.115	0.703516	16.9884	16.6509	20.7673	1.16401	13.5819	20.1755	17.0085	1.61718	16.6088	21.7234	18.1745	19.871	16.5072	18.9299	18.3473	19.8196	16.7366	17.9691	18.5876	19.8	18.2239	19.7653	18.1922
4713	chr19:36149712-36161023	19.3785	14.3751	15.9219	22.8248	13.4689	12.4413	13.9955	16.2776	5.00517	12.3499	10.8178	18.5992	6.84568	19.7762	15.8663	24.7811	13.3531	13.602	14.2026	16.5403	23.2202	17.499	15.1396	25.0997	16.995	14.391	16.857	22.8823	22.0446	11.7745	13.7726	13.7066	19.3009	12.0329	11.6976	19.2352	13.0896	13.1421	13.2761	17.0638	11.2475	13.9344	13.0547	14.2792	14.7072	13.7811	18.4416	17.2923
4331	chr16:2660502-2669985	17.8839	17.3312	18.0146	17.5105	19.2102	17.5888	20.0127	17.118	0.0672286	17.5666	16.6024	14.6834	0.0615773	17.9319	18.6908	16.2358	0.39249	25.516	28.9954	26.2083	0.703308	15.4856	16.5347	13.7013	0.238013	15.5781	13.7248	16.4096	1.05534	17.9879	18.6736	14.9734	1.06689	16.8268	17.4024	16.0859	15.6126	17.9211	14.978	12.9409	18.8558	17.4906	18.3934	16.6655	16.1323	19.0464	17.6496	12.3396
3887	chr12:100159473-100166196	14.6211	16.7325	15.646	15.0754	18.0181	20.7022	17.5251	18.0639	0.0948239	18.0667	20.8082	20.5609	0.121594	12.6462	14.5655	15.6705	0.524458	22.5998	21.4283	23.6637	0.752548	14.6517	14.6068	15.6219	0.783323	13.9023	15.3582	15.8765	1.45685	16.2133	19.0773	18.7921	1.60513	16.9626	18.8771	20.0779	21.2829	20.0407	22.5075	22.2574	17.2217	15.7841	15.9907	18.3443	20.6187	17.9587	14.4287	16.8529
6169	chr1:206052701-206058911	14.4027	13.2321	12.2633	10.1198	28.2989	20.8068	36.352	25.2257	2.13524	13.6214	24.318	24.1613	1.44801	14.1386	22.7609	14.9783	3.94289	24.1596	29.0149	17.5849	7.03609	11.6027	23.5205	16.8661	1.66576	7.12151	5.49068	9.99171	2.77721	3.59861	10.1478	3.35959	7.20425	24.4848	29.4096	18.4718	13.3184	9.79818	10.4072	4.83741	18.7385	15.379	14.6537	11.0474	21.4447	21.2746	25.9447	11.7289
4184	chr14:73702886-73716167	14.7705	13.5004	12.4198	15.8438	15.3064	15.995	15.5769	17.4134	1.0273	14.634	14.1744	14.705	0.501249	16.9926	13.9134	17.0554	3.31883	16.7492	17.8881	15.7821	5.36831	16.6548	14.8204	18.0152	3.68231	14.4537	15.0439	15.6391	4.74584	16.725	18.2798	15.0339	8.48148	16.2558	14.3754	16.2519	16.5665	12.4365	13.8132	15.792	12.1838	15.863	13.201	11.4376	15.8064	16.5064	13.4177	13.5594
2574	chr7:97948903-97960343	11.7283	12.5997	12.2849	11.2298	17.3683	20.781	16.2357	18.0765	0	16.6096	16.343	16.7856	0.112298	15.3161	12.395	15.0547	0.205487	18.9864	18.2032	17.577	0.482488	13.3151	13.0211	12.7336	0.213742	15.0258	14.148	16.6942	0.297811	12.9575	14.1992	14.5146	0.43237	15.7126	14.3942	14.6527	16.3402	17.5152	20.2309	17.3917	15.5536	17.0756	13.3364	16.0784	12.464	12.9768	11.0639	17.8637
3107	chr9:92071888-92078398	9.59018	11.4074	12.086	6.76691	10.9954	14.7242	12.0195	6.4169	0	16.3921	14.1288	8.64785	0.125572	12.6327	11.0262	9.47488	0.391167	19.5346	22.4557	20.0923	0.211955	17.793	9.00007	9.49516	0.057782	17.7888	14.0164	11.2598	0.425187	18.8454	10.5665	21.3208	1.2087	16.1478	12.4257	12.2661	15.5633	20.4293	16.7046	16.4556	22.4227	21.1906	24.5309	19.2725	9.42983	16.4939	11.6392	11.551
2521	chr7:64990455-64999936	13.7777	12.6999	11.8052	9.13079	15.294	16.4197	18.0248	13.093	0.174831	14.0471	17.4633	12.6982	0.234043	15.6309	18.8817	11.9452	0.454558	11.4043	13.0888	11.5829	0.5094	11.2558	11.6638	9.14616	0.753866	16.3028	19.0466	12.7845	1.12294	18.3284	17.9286	11.4311	1.28053	14.7018	16.8372	14.2118	13.7402	14.4866	13.2667	11.0604	16.3245	14.5924	15.1037	16.5845	10.6527	13.257	12.6032	12.2355
3776	chr12:42440799-42451511	16.163	16.3686	13.8661	15.8756	18.5485	16.3943	18.8084	17.5499	1.4879	12.352	18.6518	14.8291	1.05755	13.8719	13.3614	12.6227	1.77389	16.3636	15.1158	12.609	3.97191	12.517	16.2172	13.5187	3.14306	11.7479	14.9301	11.5256	4.19427	10.3891	19.0173	8.95432	4.40763	13.0124	18.2254	13.4558	12.6247	13.0654	13.5487	10.1599	13.4636	12.035	9.91159	9.86897	17.9791	14.644	15.5082	9.88513
4766	chr19:52649616-52653116	14.7996	16.8214	15.8662	12.7608	14.2879	12.9249	16.7008	12.0191	0	13.7556	17.7211	13.9289	0.0667237	14.6411	16.8352	9.93822	0.0559595	14.8312	13.7184	13.2087	0.525578	12.8975	13.6732	10.6279	0.429842	11.2013	12.4847	10.011	0.486612	10.814	14.1995	13.162	0.963377	10.5913	14.9951	9.18129	14.2947	11.547	13.0457	8.98669	16.1611	10.7786	12.7434	9.76125	14.9915	16.3975	17.3644	12.6195
5429	chrX:63426518-63434693	15.8702	20.1039	10.7056	11.8706	18.1299	15.5717	14.6878	15.7319	0.140371	13.6907	16.9035	10.3609	0.528571	14.5313	14.5805	10.4428	0.431318	18.9941	14.3478	11.6841	2.64439	13.5559	13.426	11.9724	2.48481	12.2142	14.1581	13.0963	2.76089	13.6687	22.0411	10.9176	2.50264	13.7205	13.1937	12.4597	10.7751	10.5801	9.84694	7.93896	7.74496	13.6541	9.11283	9.76378	14.7768	18.2801	17.4174	9.69373
6062	chr1:150628159-150635776	13.9516	13.9035	14.4727	9.30227	17.5301	14.447	14.1105	9.12766	1.35588	11.2765	13.2552	9.53596	0.781936	14.2396	17.8008	8.09805	1.51732	17.5714	12.6091	8.34667	7.54811	14.0698	16.0887	8.97952	4.099	13.2286	14.6277	7.17549	4.80808	16.526	14.5079	6.20101	7.17237	15.4649	14.5849	7.91956	15.0934	14.4934	10.9747	7.29263	8.04288	14.7058	15.0511	7.04438	18.7839	13.8373	15.1951	8.54437
6069	chr1:155626674-155635703	15.203	18.2026	15.8912	12.6587	13.0611	12.188	14.5439	12.6577	0.155339	9.46513	13.4095	10.5502	0.142281	9.81278	15.5081	9.72845	0.499007	14.138	13.5557	14.4537	1.70658	12.1728	15.6294	10.7133	1.16657	8.93814	14.4149	12.1426	2.05171	9.19357	11.3546	9.30735	2.44026	12.111	15.8085	12.0207	12.2294	12.0346	12.5591	8.69483	15.5184	11.0568	12.5494	10.4074	13.3244	14.1946	15.3552	10.0095
5047	chrY:7377455-7388167	0	0	0.0392807	0.0287601	0	0	0	0.027857	0	0	0	0	0.730476	19.8064	20.435	29.069	0	0	0	0	3.82163	32.1864	26.3867	29.7893	2.54605	30.0507	25.287	32.4158	0	0	0	0.0270523	0	0	0	0	0	0	0.03613	0	0.027365	0	0	0.0249216	0.0462188	0.0461956	0.0388676	26.9795
4617	chr19:11853297-11860978	11.126	11.6137	10.9011	7.90121	14.3971	15.375	13.7588	12.0818	0.248996	13.8934	17.712	12.2051	0.0912261	12.8278	11.5376	9.79732	0.510061	14.6345	17.4282	12.7127	0.419173	9.67778	13.6447	7.78696	0.024487	14.0087	12.6301	11.427	0.554422	13.7757	14.9071	10.5256	0.20489	15.0305	14.7911	11.3298	13.9447	11.2605	12.546	7.45326	16.9821	11.7178	10.8604	10.0789	15.0824	14.1085	13.6592	8.73661
5929	chr1:74740173-74745417	8.27439	10.3064	11.3126	6.46173	10.762	11.1131	11.3192	7.16918	0	13.5658	13.705	10.8311	0.0445376	8.3334	9.37858	7.90397	0.0373526	9.17312	13.7759	10.0348	0.0877049	6.08716	8.96943	6.8212	0.251052	9.56332	9.06607	10.4832	0.0406012	12.6102	11.3398	13.6479	0.0857397	13.9602	14.8765	11.8798	15.0616	16.0781	18.449	16.9148	17.9418	11.3166	16.5019	12.4712	9.72348	8.96375	10.5586	10.4168
2637	chr7:135174033-135184466	9.12521	12.0045	12.9866	8.26816	4.35429	6.5787	8.06077	4.7193	0.122215	6.11244	5.37198	5.66141	0.156718	6.24551	9.7687	6.76389	0.300425	6.57435	9.69487	9.82624	0.881756	20.1517	22.4253	16.733	0.522827	16.9567	16.204	13.991	0.285734	6.16409	7.5721	8.94377	1.22835	11.1112	10.1662	9.14721	9.1568	8.49881	11.0917	9.48077	9.49668	7.3463	8.55178	10.9005	6.0742	6.64032	6.50483	16.711
4778	chr19:53433375-53443110	14.5554	10.4275	11.2378	9.46221	18.5716	13.7856	16.6768	17.4719	0.563201	15.0621	18.414	15.2328	0.323911	7.55033	7.19178	6.05758	1.0665	12.3299	13.1839	9.09328	1.72457	7.26129	10.8085	6.99669	0.540988	6.6039	7.49881	6.8365	1.46548	6.27805	9.34589	7.32268	1.13165	8.72592	11.9661	8.4316	12.3622	9.10811	10.6943	8.6757	7.82887	7.71148	8.52334	7.04758	14.3416	10.4204	12.7021	7.65554
4678	chr19:23340355-23353938	10.4648	15.7238	10.9664	6.69108	13.1756	15.3006	10.9925	11.6877	0.0375498	12.9033	12.9773	8.99324	0.0343934	9.71148	11.3856	6.52151	0.0144224	13.6415	12.7971	11.9597	0.32171	9.90505	13.2758	8.13309	0.0276957	12.1854	9.51161	9.08966	0.250829	9.7716	12.0245	9.96334	0.314502	9.70939	13.5264	8.37303	10.0478	9.56803	10.3148	5.61298	11.9992	13.6005	11.0683	8.88379	10.4613	12.2047	11.127	8.39176
791	chr2:203960014-203967570	7.73535	10.4682	10.4688	9.29581	12.2062	16.4412	13.5102	12.2421	0.303738	10.7359	11.9467	10.378	0.309117	10.0955	12.9013	10.3186	0.596272	12.4812	13.7232	10.1854	1.46094	7.18224	8.08198	6.17354	1.46863	10.439	13.1568	7.10577	2.95886	11.2874	10.1612	12.0803	3.65976	13.2295	10.8962	10.7973	14.5037	13.5175	16.7998	16.991	12.763	12.3277	11.9256	7.59586	10.1558	11.9843	8.81596	8.21169
3927	chr13:19626060-19635907	8.6789	13.3882	12.9902	7.88414	11.6966	14.9138	13.1075	8.54566	0.181282	11.2342	16.6404	8.44866	0.545572	11.0958	10.89	6.79052	0.596815	17.172	12.4297	8.15575	1.75167	11.9491	6.11801	6.71367	0.955064	10.3257	11.5105	7.24851	2.01103	14.1734	14.4679	6.32712	2.53438	13.4405	6.97385	8.86296	9.0297	9.75491	9.82586	6.67742	10.0022	13.4913	5.20987	6.34389	14.2288	17.0358	11.712	8.45888
4755	chr19:51396764-51402961	14.5044	21.9816	12.6964	6.90979	9.9217	11.5699	9.79643	7.2706	0	4.82998	3.79687	2.79837	0	11.9244	11.4401	4.45911	0.0632186	7.30152	4.73166	5.35036	0.0371097	6.32862	10.187	6.78831	0	8.97573	11.9343	9.44199	0.171792	21.7106	28.0725	18.3295	0.0725564	11.2836	16.244	8.05846	5.33852	3.78722	6.80697	3.10976	5.34482	5.58105	5.11075	2.92917	6.39099	10.46	9.53973	7.07385
4763	chr19:52408081-52414733	10.0511	10.9658	11.9546	8.8454	10.0019	11.0092	11.6954	10.8553	0.0191672	8.08635	9.26103	7.14088	0	7.16702	8.9258	7.15849	0.147238	9.52303	7.85785	9.23724	0.207431	6.10148	11.5992	8.43208	0	9.45852	6.35323	8.26461	0.480129	10.49	12.6093	9.32206	0.405565	8.18377	10.1608	6.46672	9.51167	9.99661	11.1702	8.98947	13.6159	11.4031	10.7966	10.2332	8.48433	11.0836	7.38522	6.18452
6228	chr1:235670261-235675550	10.9666	13.625	11.2164	6.17379	7.80764	9.13383	10.1176	5.5286	0	11.236	11.081	6.36732	0.0220794	12.3186	15.2467	6.01749	0.111105	11.7065	10.5252	7.47646	0.0869588	14.0538	11.3894	6.81728	0	13.9644	14.7092	9.72542	0.0805117	9.485	8.39057	6.24547	0.255031	10.8247	10.9435	9.34817	9.06954	7.39547	10.7557	7.17989	13.9099	10.5516	13.747	12.1128	10.2024	10.9457	8.57966	8.09677
3511	chr11:60215182-60225509	7.67524	10	11.7753	4.77316	8.35362	8.57697	8.36124	6.2703	0	6.88931	6.91854	4.62429	0	9.46441	13.8165	8.62527	0	7.51818	8.93017	8.1302	0.0445403	9.67142	13.3056	6.78963	0.0546406	8.21218	10.4174	11.7996	0.144333	4.3724	4.64146	4.77033	0.152398	7.72584	11.4543	10.1269	6.64775	8.45977	8.76957	6.03775	13.4261	11.5322	12.7865	10.7022	9.92394	11.1169	10.5226	9.30663
3943	chr13:36316325-36321264	10.1299	12.5441	7.15555	4.49063	5.48098	7.99555	5.37169	4.59125	0	9.48517	12.9921	5.03751	0	7.80225	8.79142	5.99426	0.356929	11.5717	10.0664	8.25251	0.13968	9.97147	10.108	5.62006	0.342709	12.923	10.987	7.42031	0.086216	12.0961	10.4227	12.5546	0.2731	8.36121	8.29784	5.65593	6.44683	10.9112	5.2496	3.3279	5.99378	9.94644	7.76692	2.54015	9.92289	12.1219	10.0304	3.95972
3955	chr13:48056441-48062297	8.2415	12.1559	7.3285	4.31361	8.0704	11.6542	7.21836	5.14625	0	9.40755	11.4693	5.02132	0	9.43006	7.7933	4.71872	0.434845	12.5253	8.92578	7.99933	0.117811	8.48816	7.39809	5.76637	0.0963511	10.199	9.92292	7.90553	0.218153	9.57923	8.4877	10.589	0.499074	9.05558	8.84046	5.44586	7.62661	8.83183	8.8554	7.16235	8.40892	9.9999	6.5509	7.52136	8.79201	10.3085	9.31312	5.98856
6171	chr1:207632285-207641252	7.16024	6.37084	7.60168	11.5437	5.42429	5.90094	6.16872	7.98657	0.298607	8.03084	5.77303	6.97929	0.0781444	6.82339	6.47344	9.35546	0.436919	5.52432	7.20384	7.4973	0.974602	7.78141	14.0809	8.42567	0.440488	7.16944	5.35592	8.92787	1.04482	4.93374	5.44433	7.75589	1.30378	6.54226	7.4577	8.82281	7.74812	11.0999	7.85515	8.81815	9.02235	6.6186	10.099	9.94348	8.39224	10.4298	13.9292	5.34019
2776	chr8:41590933-41598326	7.36683	9.62907	5.69129	8.70901	6.26866	7.36456	7.90769	8.11262	0.0862316	7.04125	11.9786	7.61511	0.0157966	8.49088	4.67493	8.74387	0.238468	8.24654	5.86323	7.65318	2.11528	8.01911	7.47878	9.71606	0.585139	8.01725	12.7323	9.61074	0.979228	7.27953	5.94296	4.15472	2.25035	6.09404	6.27332	8.32669	8.11094	6.81958	7.27636	8.05024	9.87248	11.2704	5.97356	6.60784	8.50461	10.6421	5.80039	9.21374
2108	chr6:29875650-29881048	10.9912	9.19844	11.8473	8.50305	0.255	0.0710272	0.0833052	0	0	10.6074	7.13253	9.63751	0	0	0.0820817	0	0	12.7937	16.6893	15.4963	0.127805	0.168958	0.076435	0.212052	0	0	0	0	0	0.337946	0.164423	0.161036	0.083294	0.521616	0.1332	0.32058	0.689465	0.402565	0.716911	0.629995	18.4617	9.46487	15.2875	13.2034	9.90468	8.61641	9.33192	0
6078	chr1:158947555-158959388	7.18497	8.61599	6.82747	2.8379	8.76415	9.26771	13.7202	5.49756	0.183186	6.0859	7.33971	3.84463	0.404664	3.99568	8.08876	2.10606	1.40719	9.54021	9.76907	5.70729	0.447029	6.08959	10.7405	4.86139	0.302018	6.85883	10.4717	6.11357	1.70953	8.981	12.1524	7.68978	0.741021	6.54434	10.7866	4.80561	9.26184	6.13428	10.7608	2.92211	8.9182	8.66949	4.03394	3.97072	7.15475	6.98388	6.79086	8.17926
2534	chr7:77339937-77345880	7.52485	12.1259	8.28319	3.2656	5.32725	5.41924	6.4317	3.06264	0.0214534	7.2991	8.85402	3.72144	0.0786002	7.62081	6.18812	2.86452	0.29664	7.45324	5.5059	4.65769	0.34826	9.28472	8.0535	6.01904	0	6.36738	7.27266	4.38178	0.10748	8.59488	7.24336	7.50858	0.794397	5.21169	4.77899	4.20141	6.33206	6.21611	6.51178	2.52735	5.72118	8.33252	5.10396	4.98577	8.08022	20.3985	9.59712	3.46111
3191	chr10:6629619-6635541	8.44874	11.9463	7.24684	6.29427	6.2759	11.4596	5.99889	4.93775	0	7.25173	13.7977	6.36586	0.0197197	7.17822	6.88344	3.08299	0.0661538	11.1793	7.10411	3.90373	0.0776654	4.00428	3.76233	2.5128	0	5.85105	3.9736	3.90872	0.0359536	4.08164	5.39558	2.88686	0.341663	8.08298	7.95274	5.05122	14.8738	12.7699	13.5925	7.08254	12.5718	12.5431	7.98439	9.87166	9.6136	15.2069	9.70145	4.95383
4765	chr19:52620842-52627302	6.92272	9.86319	7.29472	6.24703	7.81314	9.31833	7.44852	7.06702	0	5.64063	11.3243	5.2133	0.0361553	8.241	6.99617	4.04844	0.0303226	11.8705	7.76244	5.93306	0.249194	6.07101	7.21745	4.03123	0.465834	7.26941	5.20389	5.57394	1.12063	7.69533	10.03	7.53573	0.382816	4.79466	5.95486	4.05656	6.20947	6.3915	6.05063	5.52764	5.03651	6.44898	4.55745	4.83475	8.42991	9.65122	7.4758	5.89851
3170	chr9:133031013-133037385	7.85217	5.8617	5.48056	6.57502	7.27295	7.52149	5.99875	7.25826	0.0400186	6.3993	8.79512	6.19246	0.0183273	8.54184	5.70203	7.473	0.338154	7.62425	5.93557	6.7788	1.62408	6.79895	5.63353	6.01807	1.0626	6.72583	8.21508	6.55909	1.23635	6.6564	4.31812	5.91174	1.69354	5.9656	5.13434	5.74209	6.42501	4.97918	4.25141	5.33711	5.10605	7.46322	3.50029	4.06364	7.4586	8.77498	7.57902	7.25004
2909	chr8:97175022-97180753	4.01747	5.9805	4.84538	3.38638	4.08316	6.28868	4.55101	3.28004	0	3.48177	3.20979	2.93817	0.0203768	8.52656	6.33968	6.28533	0.0341791	7.31337	8.89797	8.38608	0.160507	10.6625	4.39166	4.39413	0.0328174	10.1032	5.36294	5.60967	0.0371517	5.80921	3.32973	5.56163	0.392275	9.17118	6.21035	7.20382	4.3294	4.92931	4.72684	5.6867	4.245	4.45751	5.60407	7.59223	6.04675	8.46119	8.57186	4.05982
3409	chr11:17370180-17379293	5.24771	4.67748	7.1567	4.15813	5.38775	5.72226	5.87251	5.4683	0	5.95044	4.41299	5.12993	0	3.88022	3.20918	4.22374	0	3.34512	7.18171	5.07391	0.126183	4.75419	6.06738	5.02466	0.0619188	4.10267	4.69041	3.8103	0	7.60738	5.74672	10.1755	0.172698	4.22297	3.27459	2.68583	5.80876	5.15102	5.47847	5.84679	6.78703	5.43433	7.34277	4.62845	5.97604	6.62464	6.62458	5.62469
4767	chr19:52627908-52636164	5.36331	7.8775	6.21767	3.84341	6.22485	6.40907	5.82837	3.93957	0.0154438	5.67479	6.73652	3.59226	0.0424367	7.07408	5.79644	3.46671	0.0237271	9.63464	7.41236	5.8953	0.111424	4.19811	4.59802	2.39179	0.205036	6.18525	5.70077	4.16683	0.541604	9.55706	8.60092	6.2827	0.381244	5.74133	4.61606	3.29399	8.01457	6.00152	6.98462	4.49695	6.2843	7.33134	6.05164	4.00947	7.85559	10.369	6.75743	2.77748
564	chr2:69443011-69449341	3.91716	5.06757	4.98516	4.76931	4.92912	5.14855	4.83084	3.5825	0.120852	7.40116	4.05502	5.71739	0.0184489	4.8955	6.08985	5.33986	0.742686	6.39569	5.63927	6.63155	0.326971	5.18708	3.65024	3.61671	0.386262	6.62639	3.56578	4.77419	0.571822	6.19622	6.45004	11.7188	1.02997	5.2638	4.77083	5.42869	6.27165	8.44523	7.33648	10.3421	6.11234	5.96051	6.48325	8.05469	3.75404	4.9247	4.01196	4.7944
606	chr2:88876863-88890156	3.96412	6.57879	4.55824	2.71164	6.62794	8.42297	8.76254	6.06112	1.24699	11.194	7.98197	8.9058	0.325079	7.26316	4.66694	4.34352	0.795801	9.56746	7.5772	6.33917	1.92047	4.32292	3.63191	3.10029	0.424498	3.43009	4.84148	2.22524	3.0756	6.27908	3.77285	5.90785	2.87535	5.36662	3.32688	5.18921	4.76013	4.02187	5.06608	3.26216	4.74121	10.1124	9.26256	4.13713	5.66132	5.73293	14.0007	2.66378
4485	chr17:75252632-75258297	5.62744	8.99768	4.30766	4.13275	5.34565	6.97106	7.06479	3.47626	0	6.3555	6.94745	3.06112	0.0206142	7.01291	4.5364	2.7002	0.0345772	6.72596	4.27577	3.70494	0.0405941	6.76184	5.60815	3.23295	0.0331997	6.92123	5.42541	3.57526	0	6.1989	5.71865	7.72354	0.079369	4.72184	4.69616	2.96746	5.1098	9.28299	4.98684	4.25218	4.81185	7.97822	6.61424	3.53405	5.59285	6.98755	5.43819	2.91664
4795	chr19:57896518-57903857	6.03336	6.70611	5.7905	8.89901	7.12757	7.00078	7.04673	9.59535	0.43433	2.48257	5.53786	5.30815	0.556947	6.49621	5.67533	6.55572	1.68155	7.39861	6.36961	5.30545	1.31611	2.67199	6.57802	5.06925	1.17889	3.72749	3.01017	5.21308	2.26299	3.04509	6.34951	4.50116	3.18592	3.90074	5.82959	4.58137	4.39523	3.31643	5.1151	3.70718	4.39342	4.33784	4.13324	3.7829	7.01564	5.52878	5.95652	3.8137
3799	chr12:54942538-54948366	6.22981	5.88098	6.13642	7.08292	8.81773	9.21026	8.87339	7.37247	0.32815	3.05167	4.47765	3.27738	0.520981	6.47596	6.91842	5.58807	3.83157	10.1337	8.53116	5.84564	1.77565	3.59937	3.9646	3.09345	1.93628	4.22436	4.12008	4.74404	2.95921	2.50413	5.48259	2.93342	4.05035	5.15346	6.47713	5.13267	5.32169	4.17612	5.04659	4.47366	6.13581	6.4064	4.20965	5.67957	9.59874	5.77333	6.64336	3.64511
536	chr2:53755319-53760155	6.40881	5.99676	5.74193	6.17871	5.88232	5.62886	7.62471	6.35486	0	1.25574	1.59225	1.40312	0.0724415	3.45023	5.03902	4.89753	0	6.49993	8.1719	9.93778	0.237757	9.05227	10.4085	7.1007	0	1.13127	1.78742	1.92782	0	3.86641	5.50582	5.27257	0.325401	3.00815	4.90631	3.93611	4.2754	3.95417	5.28137	3.86756	3.09101	1.95038	2.39814	1.98707	3.17333	1.63703	2.84078	4.39267
4613	chr19:9741762-9751748	4.83333	7.17301	5.14062	3.45529	6.24938	7.44911	6.0347	4.811	0.0893796	4.90898	6.12654	4.15295	0.350856	6.08739	5.99044	4.39811	0.686593	7.72718	6.25602	3.96019	0.43758	4.52129	4.13209	3.63969	0.414379	5.43342	3.94374	5.40901	0.682338	5.16112	7.68879	5.2234	1.17075	6.48571	5.65265	4.60501	4.01716	3.09031	4.99958	2.8949	5.04893	5.74649	3.84185	4.1704	6.29649	8.47369	5.62857	3.78222
4861	chr21:13889758-13900479	3.34553	5.20567	3.21831	0.833344	3.03889	2.6824	3.02025	2.00402	0.0594662	6.71708	6.34506	2.39129	0.0653609	9.11663	13.9288	2.32449	0.0730887	0.888577	1.34778	1.07824	0.0214518	7.35923	11.6235	5.39227	0.0175442	5.61384	6.49564	3.08891	0	5.36038	3.43597	3.59494	0.125827	1.31328	1.57619	1.22223	1.04153	1.33788	1.19129	0.31723	1.039	1.42979	0.957039	0.946227	13.5769	20.4936	20.6991	15.7589
1298	chr4:8482383-8488709	6.78936	6.39056	3.85763	3.5549	5.80263	8.00044	7.03758	5.61298	0	5.55438	8.31805	3.17834	0	6.46866	4.69285	3.15914	0.278683	6.17386	5.23978	3.5583	0	8.0018	8.4139	4.07137	0	4.97294	3.79579	3.35421	0.302921	4.32568	5.26151	4.58055	0.284308	6.30571	6.99028	3.908	4.57597	3.02297	4.52702	2.73276	5.05051	5.59151	2.75007	2.57407	6.41721	6.80508	4.93586	3.09168
3436	chr11:34897254-34907021	2.67486	2.02468	3.74804	1.4825	4.22834	3.92584	3.36127	1.86367	0.600521	5.55204	3.85471	4.11739	0.298935	2.68481	3.03969	2.8294	0.521476	2.14579	5.17794	5.45055	0.353203	6.4904	4.60496	3.25247	0.25035	4.99505	5.35982	4.97067	0.893846	6.86455	2.90818	7.12068	0.805675	5.67008	5.41127	4.86013	4.53065	7.20922	6.57781	5.54238	6.87284	4.62782	8.86081	5.90386	2.28106	3.69853	2.77081	5.10999
4152	chr14:52280717-52286570	6.6571	6.45646	5.96645	2.57896	3.52771	3.53736	4.37933	3.77245	0.0217833	4.22445	4.60471	3.30633	0.119713	5.15865	8.78142	2.1498	0.167334	5.20797	3.41241	4.10566	0.196452	2.64904	5.00508	3.81362	0	3.89474	4.34863	3.40552	0.400152	3.27263	6.06575	2.17829	0.15364	3.76841	3.80826	3.84362	5.72289	2.30191	5.88459	2.56621	7.66205	6.58049	4.49652	3.23812	7.9507	10.652	9.17564	3.85999
4054	chr13:102669280-102672426	2.53298	2.65342	3.87786	1.76229	2.62488	3.89934	3.00129	1.89661	0	4.41165	2.99116	3.27488	0	2.14648	4.78786	3.29332	0	3.63292	3.64656	3.19025	0.0730874	2.75372	3.54056	2.81943	0	3.33267	5.49459	3.26962	0	4.92814	3.38502	4.97294	0.142899	4.32528	3.99907	4.87133	6.30852	5.11074	5.28872	5.94451	9.12926	5.49592	7.23021	6.36286	2.20273	3.61695	3.30782	5.67993
6262	chr22:16611312-16616782	2.3474	1.76728	2.30752	3.32267	3.6069	3.50462	2.13743	3.49107	3.14661	3.17206	3.51933	2.9405	2.28433	5.01138	3.96907	5.50269	9.48955	5.05013	3.96205	3.67016	7.35717	8.16999	3.77145	4.28986	6.84222	7.33462	5.09203	6.34747	4.67088	2.75136	3.08293	2.64862	8.05539	2.40217	1.77453	2.03375	2.26797	0.95344	1.4857	1.91692	2.30413	2.73024	2.03869	1.3664	2.8961	4.43242	4.26207	1.7877
1945	chr5:112524093-112532633	5.96272	6.89517	6.0602	5.84397	8.59695	9.83271	8.89946	9.39914	0.492698	5.94327	9.36801	9.27064	0.0820512	4.00096	5.6037	4.1604	0.252319	6.86021	7.36494	4.41694	0.0807889	2.08266	4.49345	2.34577	0.0660728	3.9508	1.63087	3.99063	1.12199	2.45669	4.98896	2.85027	0.710808	3.73692	4.54676	3.99505	2.80868	2.39204	2.22058	1.29427	3.91293	4.92447	3.96993	2.46948	6.60885	4.22986	5.94772	2.64564
5843	chr1:25588008-25604799	3.24383	4.37082	3.10749	3.43116	5.60253	4.81857	4.28552	4.12316	0.121505	4.8574	5.4274	5.85305	0.0973796	4.96926	4.98791	3.67383	0.198341	4.28367	5.36599	5.67088	0.26025	3.66685	3.56345	2.52264	0.347272	4.80654	2.80319	4.84465	0.393137	5.37853	5.55091	5.4193	0.495446	4.75182	4.3255	4.3291	5.96068	5.97982	5.78562	8.15293	4.74868	5.61815	5.84518	5.16736	4.71789	5.74703	5.00897	5.48307
5361	chrX:49139779-49148918	4.40911	4.95268	3.63723	5.59582	6.57746	7.55204	5.36372	9.01172	0.0139518	2.37341	4.72813	5.00533	0.012779	5.65161	4.89705	5.53464	0.385827	6.61909	5.90573	4.95962	0.100659	1.99607	3.97321	4.0083	0.246971	4.73957	2.89032	6.33243	0.186392	2.94446	4.95337	2.25127	0.54122	2.87578	4.48483	4.08492	4.43468	2.85354	4.31949	3.62835	5.93378	4.08566	3.22163	3.15475	4.11716	5.03557	4.60123	2.61985
5633	chrX:108139441-108148433	4.33345	4.54493	4.39859	2.98069	6.02158	3.66718	5.15132	3.84944	0	4.53494	5.18604	3.74548	0	3.97661	4.63215	3.26531	0	4.87331	5.81322	4.39792	0.0255761	3.70238	7.20444	3.78738	0.0209173	2.99164	5.44785	3.93307	0.1184	3.19548	4.98499	3.57713	0.0750091	4.9061	5.51775	4.0692	4.64515	3.38355	4.04578	3.56158	4.49863	3.36566	4.31611	2.90944	4.62493	3.85217	4.63015	3.60023
2403	chr6:166894493-166900032	3.91689	4.60116	5.62098	2.66952	5.6329	5.88365	3.97807	4.36335	0	6.03017	7.4144	4.49193	0	3.44276	4.39959	2.67253	0	6.79295	7.21164	5.60143	0.0415173	2.88151	3.05407	1.96322	0	5.18552	5.02861	5.68801	0	4.19915	4.72704	4.49888	0	4.40562	5.06258	4.86485	5.15136	4.78629	5.51945	3.42795	4.49796	4.82485	3.62393	4.24093	3.66441	3.39458	4.28415	4.38315
864	chr3:9841750-9854710	4.95433	5.12021	4.54548	5.22981	5.16948	4.70432	4.8582	5.06558	0.137742	3.61521	5.08389	4.65458	0.288372	5.61032	4.58169	4.07434	0.891825	4.96177	3.83675	3.54443	2.02305	3.62461	4.29834	4.37243	1.2917	3.44786	4.37293	3.69651	2.20166	2.88586	4.96566	1.94534	2.32468	3.73003	4.71626	4.1779	3.92509	3.01844	2.86689	2.16504	2.94043	4.24594	2.85704	2.4513	5.92138	4.96382	4.85107	4.13735
3317	chr10:89406288-89417471	3.64289	3.89033	5.07957	3.80175	4.30849	2.74303	5.95183	5.9238	0.102617	2.94825	3.7875	4.06808	0.0104435	2.62911	6.69652	3.46405	0.543039	3.3223	4.06633	5.79416	0.946019	3.50723	3.91124	4.68328	0.538224	7.09437	4.16585	3.79508	0.666431	3.67067	3.57184	5.364	1.52797	4.57449	2.50775	6.124	4.2159	4.62518	3.77232	4.53654	4.79689	3.93646	3.15143	4.03438	3.45325	3.00901	4.13262	3.89006
6245	chr1:246634727-246642803	2.74142	2.55739	2.60502	3.16614	4.48859	3.3709	5.51278	3.95347	0	3.97493	2.33086	4.2325	0.101226	3.49288	3.95041	3.72727	0.630652	3.83358	4.47286	4.36934	0.569533	3.55756	3.72974	2.97663	0.256185	3.6132	2.91391	3.50329	0.105462	4.17909	3.84676	4.62866	0.807319	4.0097	4.45182	3.55108	3.78935	7.15781	5.60679	5.29902	4.82734	3.06602	6.24174	5.78463	3.06514	2.63469	3.2478	2.6306
2152	chr6:57069287-57080996	3.89525	4.39115	3.48582	3.34156	4.82038	5.92734	3.572	3.2621	0	4.77948	5.37124	3.64922	0.00997437	4.54698	3.44385	2.99235	0.284419	5.00368	5.00885	3.61132	0.0392837	4.94663	4.2994	3.17748	0.128512	5.0623	4.1428	3.65207	0.0545568	3.11626	4.32111	3.95985	0.172816	3.6876	4.88234	3.58959	4.37973	3.34091	4.59448	3.36455	4.63149	3.99461	4.26716	3.57957	3.67868	5.02923	3.98254	3.57132
1742	chr5:242215-247919	3.41548	2.77329	3.31931	1.99824	2.49367	2.48705	5.91277	2.19704	0.0894087	3.2701	3.22498	3.4808	0	1.88054	5.35986	2.55198	0	2.42149	4.24654	4.53285	0.0806332	2.71823	4.19544	2.75933	0.0989182	1.67852	3.3677	2.9872	0	4.0777	4.51252	6.50235	0.11824	2.46819	3.90772	2.90383	4.34989	5.02883	6.37751	5.7633	5.3956	2.75606	5.6306	2.99511	1.82261	2.34218	2.1896	3.78345
5410	chrX:57219330-57223949	4.79273	4.75638	3.00582	2.53422	4.27129	4.31618	4.67288	2.71301	0	4.88326	3.98236	2.99246	0.0252814	4.04232	2.78173	3.84567	0	6.28969	5.70382	3.68769	0.0995697	3.45532	3.39427	2.60198	0	4.24412	2.80706	3.68874	0.184375	4.83787	3.26651	4.2029	0.146008	5.07974	3.58017	3.42523	3.58097	4.61034	4.27274	3.86516	2.79201	3.91382	3.86274	3.75629	2.78652	3.96343	4.23599	2.409
4790	chr19:57487177-57500813	4.44894	4.22184	3.39441	5.26428	6.36027	3.76811	5.54085	6.43388	0.102861	2.19522	4.07886	2.61744	0.162734	3.90446	4.35457	2.93142	0.67522	4.0521	3.14788	3.56952	0.893915	1.83953	4.02474	2.58156	0.386233	2.34067	1.86675	2.02779	1.51474	2.9435	4.52421	3.01776	2.37433	3.23536	4.48247	2.61093	3.27558	2.93257	2.66801	2.39028	3.28911	3.66075	3.86047	2.70177	4.50228	4.10082	4.7938	2.02796
5815	chr1:8921235-8927121	2.78332	4.10599	2.21594	3.24489	11.3033	15.438	9.16796	9.17549	0.389901	3.02161	4.43353	2.64731	0.178563	3.23983	3.38749	2.22159	0.366071	6.31163	4.54844	3.30746	0.156281	1.08467	1.75247	1.40994	0.38344	2.32375	2.28451	2.51251	0.180868	2.01456	1.73413	2.21531	1.26043	4.54458	4.03123	2.31005	0.772825	1.40294	0.525987	0.722214	3.53566	3.53889	2.87983	3.03856	5.29879	5.12799	4.31454	0.572888
3901	chr12:110403279-110411068	5.34374	4.40054	3.18717	4.15292	5.18416	5.9072	3.92606	4.17574	0	3.62013	3.73496	2.77504	0	3.41753	3.47018	2.3441	0	4.64748	3.98292	1.91367	0.35431	2.92749	4.82069	3.19652	0.0482951	2.63413	4.19277	2.60044	0.355378	2.86919	2.90589	1.89735	0.779334	3.31389	4.80046	2.72969	2.6547	1.61823	2.38497	1.85567	3.72567	5.8029	3.26449	1.67937	4.7671	4.51058	4.00888	2.94398
3370	chr10:120844913-120851580	5.37953	3.88871	2.39816	3.51172	3.92294	3.27806	2.69805	3.31193	0.0191241	2.86289	3.97842	2.41264	0.0875824	3.63504	3.32303	3.1086	0.0293813	3.92924	3.50577	2.50943	0.068988	2.39406	6.74584	2.96176	0.112843	3.28252	4.82624	2.50756	0.0319366	3.35198	2.5295	0.825798	0.91047	3.37877	6.47102	2.55862	2.79126	2.47723	2.37995	1.70033	3.34137	3.9497	6.02177	2.12211	4.82667	3.04299	2.87251	2.57952
3922	chr12:133090536-133096478	3.87483	2.95803	4.10689	2.74772	4.32429	4.45227	4.01103	3.76617	0.193113	3.35815	1.8719	2.36859	0.0196533	3.27616	2.90816	3.07261	0	3.84748	5.0062	3.8906	0.038702	2.9931	4.51349	2.69698	0	3.60623	3.23284	2.86757	0.179163	3.14687	3.43557	3.12097	0	4.42278	4.53777	3.2868	3.06217	4.2423	4.23337	3.10011	4.88355	2.9764	4.20397	3.14471	2.66609	3.7473	3.78344	3.06445
4050	chr13:99488624-99496752	5.01194	4.64954	3.62369	4.35876	5.02442	4.95325	4.64759	5.35995	0.20393	2.24161	3.84238	2.59747	0.17242	3.42165	3.70708	2.67133	0.385611	6.09449	4.33967	2.88179	0.679068	1.85157	4.56889	2.42945	0.185124	2.35599	3.89975	2.92711	0.681116	1.96395	3.98596	1.49737	0.580871	2.36734	4.20217	2.55502	2.59487	2.67369	4.1901	1.67368	4.3637	3.77174	2.35998	2.66033	4.87285	3.59192	4.14903	2.4893
4329	chr15:101072781-101079317	1.82911	3.15986	2.05997	1.79105	4.70359	6.68751	4.12818	3.97178	0	2.52205	2.09453	2.19182	0.107205	2.18826	2.84728	2.64242	0.0899102	2.69628	3.12089	2.93204	0.105556	6.69815	3.53521	4.20328	0.0863283	3.06928	4.11471	2.41025	0.19546	1.67469	1.358	1.37436	0.343969	3.87729	2.75029	4.87937	1.89813	1.79541	2.01316	1.69104	3.45317	4.75043	3.00297	4.53349	3.48425	3.33109	3.56705	2.52803
1064	chr3:112413020-112423381	2.00867	2.58723	1.70567	1.36778	1.68296	2.92362	1.6494	1.35363	0.0369193	5.15003	6.23516	4.53634	0.0901755	2.6076	2.13839	1.8337	0.075628	3.53988	2.62514	2.67181	0.443941	4.22562	2.50901	1.65731	0.308614	3.87258	1.48332	3.16519	0.73985	8.14383	7.19636	6.51671	0.238697	5.16386	3.95593	3.72249	5.26882	6.6701	4.74394	3.5287	4.32867	6.03168	3.57365	5.48812	2.72371	4.91932	2.77271	2.63636
3701	chr12:9959546-9968656	0.24303	0.820034	0.323312	0.0676341	3.87844	4.41938	2.81381	2.58765	0.0279924	8.33336	10.4256	5.40751	0.0128197	0.174449	0.34048	0.0541683	0.193528	0.522847	0.233249	0.267136	0	0.250303	0.181175	0.062829	0.206464	4.85475	5.85176	2.82337	0.677823	2.30299	2.09483	1.30417	1.60415	6.18199	9.90593	6.48611	6.17384	5.39127	3.78097	2.83103	4.18296	4.5301	3.9664	2.19777	0.326073	0.488864	0.228509	1.9989
565	chr2:69789472-69799355	2.28503	2.2677	3.108	2.46261	1.3929	2.09507	1.77467	1.3889	4.67037	3.86276	2.98697	2.59403	0.472682	2.17088	1.92795	1.34816	3.78588	2.98813	2.9671	2.33932	10.0994	5.90663	5.09369	2.72202	5.06243	3.0449	1.74944	2.01699	8.46729	3.83042	2.5597	2.37502	7.6437	2.13694	2.14638	2.9519	2.71997	2.50681	3.09366	1.46254	2.99568	3.02249	2.75343	1.83681	3.05582	3.15442	3.37021	1.70609
2557	chr7:92478033-92485008	3.36453	5.54402	3.01616	1.41334	4.40759	3.40819	3.80392	2.09621	0.0182797	3.73158	5.88815	2.27008	0	3.53151	3.621	1.41493	0	4.98491	3.04635	2.61669	0	6.47278	4.90995	2.50276	0	4.31419	4.40659	2.58122	0.122106	2.94243	2.6087	1.86948	0.128929	3.43144	3.19575	2.33932	2.66802	1.86936	2.77423	1.30021	2.35336	4.28244	2.30236	1.76051	2.83912	4.96596	4.35728	1.74044
1455	chr4:71031763-71037274	2.57096	5.10293	4.35167	2.45949	3.3303	4.45255	6.11981	2.11154	0	2.28264	4.50229	3.60268	0	3.89278	3.21596	1.52213	0	4.49402	4.1639	1.82143	0.125185	2.56516	4.56695	2.23283	0	2.56457	2.35279	2.50844	0.193173	1.73784	5.07316	1.52477	0.285553	2.72492	3.78361	2.46721	4.72731	0.867486	3.23018	1.74839	5.21222	6.70353	1.45694	2.90623	3.68303	3.86074	3.24832	2.32508
624	chr2:97821110-97829456	2.28136	4.05424	4.0332	2.54695	6.32267	4.27258	6.25048	4.46914	0.427763	3.43053	2.30673	2.16825	0.265868	2.47541	3.87572	2.0103	0.234712	2.73938	3.46254	2.40559	2.48	3.55177	2.32366	3.42899	0.788766	2.56761	3.85544	1.50237	0.918452	3.44279	3.61598	2.39571	2.55912	4.61102	3.79088	3.73244	3.61722	3.48918	3.19961	2.03746	2.4234	2.96684	1.7104	2.59085	2.37279	4.38746	2.24482	2.18186
4353	chr16:21629614-21637525	3.07845	2.77736	2.71253	2.99852	2.95813	4.99216	3.24022	2.14997	0	2.68694	3.94776	2.47808	0	4.11815	2.91257	1.96488	0	2.58895	3.22315	2.42249	0.0290705	2.8247	3.28594	2.20668	0	3.51565	3.94599	2.7229	0.134576	2.13312	1.51469	2.71057	0.0284191	2.66956	2.77224	2.7501	3.03197	3.90078	3.81581	3.58247	3.33474	3.42805	4.17276	3.84686	3.44196	3.62788	3.68393	2.89859
6094	chr1:169661628-169670891	2.43796	2.51435	3.99737	2.59417	2.42734	3.02178	2.28184	2.09392	0.16518	3.55929	3.51018	1.92649	0.0504317	3.38847	4.59232	3.2497	0.951657	2.46822	2.79864	2.66008	0.198624	1.57548	1.73729	0.895974	0.0812217	3.34713	2.12576	2.49907	0.206885	1.62486	0.622862	0.938509	0.922321	3.24261	2.94987	2.42882	4.10745	6.47529	7.3117	3.54918	6.20246	5.00689	5.92358	4.98581	2.83274	1.65605	2.06756	2.58478
4185	chr14:75577964-75587648	3.52084	2.81346	3.04151	4.10385	1.70583	2.33609	2.41485	2.98894	0.0131667	1.88147	2.42984	1.8687	0	3.07706	2.79119	3.032	0.0202286	2.60686	2.50145	2.60727	0.118743	2.82562	2.51396	3.78274	0	3.53121	4.46347	3.22045	0	2.02521	1.32906	1.37649	0.301815	1.64775	2.93302	3.70187	3.20291	3.45597	2.19807	2.75104	2.90588	3.53105	2.90214	3.36316	4.3456	4.54781	5.6751	2.68136
6080	chr1:160687621-160690643	4.10181	4.79761	2.22727	2.4461	2.42893	3.55188	3.1244	3.55393	0	3.0139	3.96309	1.91248	0	2.23453	3.66489	2.44886	0	2.83645	3.65554	2.81792	0	2.26316	4.91439	1.60956	0	3.46938	3.33665	2.02097	0.0704444	3.92316	3.6707	4.21823	0	3.10531	3.56838	3.3535	1.09455	5.32038	2.43273	2.25031	2.03651	2.99071	4.87027	2.56122	1.80171	3.11048	3.99447	1.78503
940	chr3:46244375-46252065	0.748541	4.91433	1.75088	0.841276	0.835369	2.14399	0.584794	1.00887	0	2.36927	1.83588	0.686348	0	4.44315	4.14867	1.57215	0	4.95505	3.20525	2.37343	0.0598117	2.66865	0.965817	1.07922	0	6.16612	2.74789	3.21923	0	3.08405	2.13534	2.18555	0.0877073	3.17347	2.47788	1.7039	2.8502	5.25629	3.92546	1.80585	1.14352	2.45326	1.2762	1.35385	2.8327	4.95472	4.4936	1.27168
1885	chr5:76909228-76912976	5.07935	3.39963	3.14292	6.0816	2.81543	2.86405	2.39939	3.66174	0	1.27299	2.2826	2.41376	0.0311549	6.5713	5.91036	3.68599	0.156773	3.04956	1.58719	2.02877	0.368108	3.89311	5.17354	4.12263	0	2.79753	4.35605	3.25921	0.284014	0.973363	1.77592	0.695733	0.299883	1.37718	2.11006	2.04455	1.54453	0.927584	1.6519	0.529239	2.26772	2.20185	1.42805	1.21066	6.8678	5.54428	8.9964	2.15904
570	chr2:71388088-71395557	3.37917	2.52986	3.3237	2.55725	2.33451	2.77211	3.13089	2.31714	0.0170708	2.72977	2.63482	2.38916	0.0625434	2.50007	3.38154	2.08114	0.288495	3.12476	2.84489	2.0771	1.47795	2.86972	4.19854	2.72041	0.906551	2.07549	2.12189	3.27142	1.22584	2.25934	3.03038	1.93984	1.11373	2.89035	3.75458	3.04523	3.32211	2.26946	3.98978	3.30117	4.19923	2.78894	3.16543	3.5741	2.58508	2.45128	4.01339	3.0701
947	chr3:48272765-48278859	3.19694	3.89376	3.17596	2.62864	3.6894	4.78165	3.09928	2.98676	0.0209219	3.13204	2.52722	2.43325	0.0191632	2.86849	3.19918	2.3482	0	4.14232	4.18402	3.34433	0	2.5443	2.57285	2.48885	0.246903	3.5163	2.9158	3.11259	0.489146	3.14323	3.13142	2.75785	0.368913	3.15735	4.24763	3.2454	2.78223	2.56748	2.98472	2.13921	3.03021	1.93478	1.61037	2.05879	4.14311	3.81624	2.80098	2.60069
6283	chr22:39052278-39066270	3.92434	3.48627	2.31564	4.0074	3.57477	3.28858	3.02136	4.11615	0.364523	2.41842	3.73047	3.16162	0.342228	4.20267	2.78696	2.8392	0.644041	4.32349	2.85518	2.30464	1.62729	2.67279	3.3915	3.41587	0.99479	2.76994	3.94745	3.40091	1.18705	1.5973	4.15535	1.80187	1.51048	1.64361	2.72385	2.77422	2.03949	1.21153	1.7703	1.72178	2.63977	3.34288	1.81736	2.17511	3.32619	3.78429	3.80889	2.12098
4335	chr16:8837971-8845472	2.18414	2.81199	2.01937	2.0535	4.95497	5.31611	3.59716	2.74484	0.016998	2.48679	2.50952	1.90988	0.0467075	2.54237	2.30381	1.84201	0.287264	3.80991	4.4191	3.00098	0.245274	2.12791	2.80542	1.60239	0.300895	5.1058	4.22568	3.72895	0.170317	2.79693	3.01745	3.7086	1.25884	4.0042	4.40959	4.08693	2.37069	1.04298	1.90899	2.30474	3.00898	3.30102	2.2004	2.38444	2.24405	4.3539	3.44123	1.84319
510	chr2:37124923-37137627	2.92792	2.73276	3.97463	2.32808	2.63682	2.77684	5.09769	4.08714	0.0702585	1.60499	1.98697	1.99827	0.174671	2.40819	5.37163	2.89396	0.061681	2.32465	3.01081	3.0172	0.181036	1.90267	2.53353	1.89235	0.0148059	1.93812	2.53297	1.72099	0.251421	2.33367	3.49359	2.62325	0.51324	3.50964	3.16979	3.93123	2.79967	5.02946	4.23466	3.25722	5.07638	3.58895	5.16203	4.93834	2.26039	2.18135	2.68744	2.81381
4906	chr21:42916753-42925759	2.9992	3.22042	3.22373	2.01824	2.95516	4.55556	3.09597	4.04226	0.0424734	2.69747	3.42032	2.03728	0.207483	3.8822	2.60769	1.7808	0.261016	4.33685	3.256	3.03998	0.2809	2.43066	2.84064	1.84308	0.146194	3.1895	2.71969	2.60607	0.0472862	2.43087	2.51326	1.70534	0.574176	3.69991	4.31153	3.23932	1.79088	2.89568	2.70732	1.8567	2.99443	2.88037	1.98133	1.74888	2.96854	4.12091	2.49639	2.2092
4003	chr13:76983510-76993630	2.75659	2.86596	2.70259	2.61804	2.5392	3.1448	2.13306	2.62429	0	3.21504	3.38206	2.70714	0.0115403	2.94451	2.53959	2.53566	0.154858	2.35336	2.77164	2.52502	0.295433	3.28974	2.40566	2.43204	0.223033	3.10876	2.89492	2.0333	0.652263	2.7492	1.66651	3.57934	1.0886	3.4318	2.27376	3.05379	3.26926	2.6199	3.17419	3.64073	2.60691	3.41778	2.8212	2.50604	3.32671	2.39599	2.87988	3.43224
3544	chr11:71885996-71891736	2.237	3.29177	2.85869	1.87838	3.19746	3.3398	4.2305	2.65111	0	2.64502	4.8444	3.02113	0	3.25301	2.47014	1.76229	0	4.31476	3.62764	2.91463	0.160255	2.62173	3.45032	2.34318	0	3.0977	3.26292	2.74443	0.0370934	2.14524	2.86063	1.76684	0.117498	3.02501	3.19426	2.54107	2.01722	3.25582	2.22487	1.57991	3.26812	3.08113	2.87536	3.25535	1.20745	3.53434	2.32093	2.40858
4490	chr17:80537010-80552020	2.62564	2.63501	2.35483	2.99671	2.47633	3.24438	3.20597	3.12129	0.00849505	3.38162	3.44898	3.14815	0.00778095	3.94413	2.65701	3.27134	0	2.63396	2.12358	2.59423	0.229838	3.00807	1.64948	2.68847	0.0501257	3.73643	2.9118	3.70579	0.255357	2.52214	2.15854	2.70293	0.314562	2.47019	2.77866	2.94846	2.56245	2.43248	2.06281	3.60656	2.44122	2.8805	2.11021	2.50783	2.17703	3.52765	2.6352	2.29168
3547	chr11:74869434-74884487	2.73581	2.5107	3.55011	2.59928	2.34732	2.59828	3.07731	2.39871	0.00847079	1.93095	2.47276	2.45456	0.12414	1.76847	2.47279	2.52435	0.312339	2.84795	2.11751	2.76871	0.198624	2.57531	2.93317	2.77586	0.0999651	2.36268	2.0101	2.45635	0.198044	1.90893	3.00743	2.38718	0.373409	2.55667	3.32009	2.67724	2.93978	3.78267	3.3682	2.82428	3.38847	2.89838	2.99328	3.5293	2.10503	2.76146	3.51278	2.84522
4086	chr14:24009540-24015782	2.19899	2.39351	1.2133	0.838991	3.01386	3.74692	3.09785	1.52968	0.020426	3.75274	2.94706	1.77161	0.187089	2.6732	3.97516	2.29254	0.125526	2.67064	3.47211	2.14421	0.147369	3.1415	2.57796	1.10031	0.24105	3.7251	2.38505	2.11171	0.136443	3.87243	2.27512	2.69247	0.396184	3.15769	2.18866	2.33674	3.57753	3.34216	2.85196	2.2247	3.66275	3.46301	3.93049	2.4804	2.30004	2.61597	2.86797	1.94479
466	chr2:6838342-6846883	2.38481	3.70443	3.25143	2.12811	4.72777	4.93823	9.16169	7.16208	0	0.609495	0.701266	0.559116	0	1.53507	7.21132	1.44442	0	3.06721	3.18446	2.49314	0	0.747534	1.15946	1.10573	0	1.12104	3.26135	2.29622	0.0747905	1.068	1.09121	0.916052	0.868664	5.60472	6.56678	8.16285	4.11568	5.69951	5.80002	2.68778	4.97639	3.6354	5.37966	4.93839	1.50711	2.3754	2.97351	1.26344
3503	chr11:58769831-58777331	2.12539	1.40618	2.63675	1.76625	0.856528	1.02247	0.779489	0.954854	3.53606	3.00769	3.08027	1.40747	0.685134	0.688651	0.76804	0.427667	2.79467	1.52417	1.47323	1.0951	9.07636	6.08055	4.2362	2.74732	3.13474	2.43166	1.47278	0.814476	6.04707	2.91892	2.78116	1.89318	12.5001	2.50296	1.86953	3.46117	1.54391	1.39082	1.70284	1.02027	1.79781	2.14857	1.66539	0.605087	2.04632	2.77103	2.44249	0.9442
2998	chr9:7785527-7791624	1.6703	1.08107	1.72521	1.71788	2.70924	3.8989	2.06517	2.15333	0	2.20558	2.66631	3.75113	0	1.56386	2.18019	1.98285	0	1.56237	2.36978	1.79607	0	1.72029	1.35347	2.0652	0	3.21546	2.363	3.21652	0.0349218	4.78733	2.32922	3.42185	0.184366	2.23215	2.35863	1.98683	5.15477	3.35034	4.88745	6.73984	4.51904	3.86766	3.58498	5.38524	1.70515	1.70429	1.36566	2.37818
4758	chr19:51976955-51992228	1.30471	1.32359	2.20408	1.35152	1.65251	1.98341	2.32627	1.50447	0.125232	3.06774	1.62476	2.38629	0.17588	2.21127	2.2921	2.45568	0.102613	2.3391	3.25574	3.3463	0.376467	3.04586	2.45863	2.47353	0.492626	2.53763	1.91826	1.93677	0.474035	3.16558	2.06325	4.30714	0.544686	3.1959	2.68373	2.91388	2.89744	3.81356	3.62378	3.76714	3.16692	2.88237	4.17696	3.51343	1.75054	1.58765	1.88103	2.82632
4454	chr17:43352787-43357982	2.04549	4.56745	3.96842	2.72766	0.971531	1.25464	0.605919	0.804088	0	4.67592	4.52906	3.82178	0	0.764726	0.59702	0.617385	0	0.916794	1.14518	0.878275	0	3.77452	3.81222	4.35165	0	4.82675	3.32784	4.51749	0.0819682	0.614511	0.683389	0.390431	0.0432741	2.98097	4.35972	4.42554	4.93521	5.85609	5.51241	3.10939	1.35409	0.907814	0.429317	0.976275	0.762344	0.285735	0.0801364	0.324537
2030	chr5:160116064-160131138	3.64267	1.77837	2.51232	3.311	3.07466	2.84904	3.34154	3.08825	0.016918	1.92826	2.61123	3.41825	0.00774792	2.71491	2.14598	2.73364	0.116964	2.36998	2.45289	3.41065	0.366179	2.11789	2.60059	2.4872	0.124782	2.35939	2.23034	2.45293	0.22602	2.45091	1.64884	1.36495	0.328143	2.27289	2.69531	3.01796	2.60645	2.04729	2.02838	2.25628	1.26404	2.9465	1.71652	1.87731	2.92323	2.65913	3.34216	2.17009
1892	chr5:82267546-82273706	2.80329	1.71202	2.86872	2.45045	1.41526	2.11624	2.70107	3.97198	0.66233	1.97176	2.5696	2.24398	0.872065	2.4508	1.58245	3.1241	4.26108	1.77835	2.48352	2.8147	2.23996	1.9248	3.08114	3.25194	1.92353	1.40625	1.71515	1.20038	3.28365	1.999	1.72905	1.97567	3.86858	2.28551	3.56013	3.13037	2.4839	1.4111	2.45015	2.39233	2.5695	1.78645	2.31727	2.08007	2.33065	2.49013	2.6358	1.47801
6079	chr1:160690812-160699987	3.04048	3.83165	2.10957	2.11538	1.80045	1.62986	2.98994	2.37418	0	2.69507	2.33148	1.47927	0	1.68883	3.67045	1.37151	0	3.01103	2.54757	2.08879	0.25066	1.73971	3.55287	1.9339	0.287002	3.08106	1.93677	1.47177	0.324907	2.98262	2.95069	2.71619	0.196035	1.84146	1.88094	2.04792	2.52416	3.69505	1.51855	1.69894	2.14056	2.27042	4.23003	1.77486	2.0505	2.64274	3.44873	1.72746
4452	chr17:43338416-43349017	2.6733	3.60645	3.69135	2.93518	0.952287	1.44681	0.721185	1.06965	0	3.80578	3.95506	3.93575	0.0220335	0.787057	0.668793	0.581881	0.018479	0.629044	1.00223	0.717398	0.216946	3.05445	4.0481	3.37457	0.0709713	4.81717	2.58236	3.76078	0.0803446	1.03258	0.460524	1.01142	0.190876	3.586	4.27337	3.59158	4.01821	4.55108	3.76035	3.128	0.525378	0.667374	0.757464	0.554016	0.467027	0.466792	0.549844	0.636218
4619	chr19:12022768-12025931	1.39965	2.08355	3.59102	1.46069	2.32069	2.66639	2.84302	2.54667	0	2.60535	1.62278	2.14504	0	2.26053	2.52113	2.49572	0	2.10782	2.68664	2.50003	0	2.88307	2.47812	2.71382	0	2.45005	2.58073	1.82928	0	1.73	2.10427	3.11428	0	0.890078	2.15926	2.18813	1.96082	2.33556	1.95732	2.59795	2.59434	1.86354	3.52518	2.869	2.97336	3.28469	1.31602	3.73074
4610	chr19:9634663-9641681	2.52371	2.50457	2.09838	1.62416	1.96146	3.49657	2.24274	2.46602	0.145342	2.28705	3.23084	1.93387	0	3.84954	2.52548	1.75783	0.41868	3.05407	2.42215	2.55732	0.0327691	2.0794	2.11657	1.75343	0	2.20885	1.91607	1.96987	0.182037	2.33953	2.97214	1.61029	0.320348	3.41042	3.02249	1.93749	2.76953	2.29142	2.81238	1.29224	2.29717	2.40812	1.97044	1.8258	2.89227	3.52538	2.96616	1.87393
3545	chr11:71908145-71917331	1.87995	1.72218	1.78641	1.74394	3.44674	3.46451	2.9374	2.82612	0	2.88074	3.26016	1.99736	0.0127136	2.9411	2.41188	1.66533	0.0213252	3.4741	3.79364	1.8876	0.025036	1.78727	2.78499	2.18082	0.0204756	2.28321	2.35271	2.13501	0.0927195	2.48254	2.27076	1.5142	0.0489501	3.01433	3.05287	2.6914	1.75579	2.55505	2.86493	1.41923	2.52092	2.61	2.03964	1.97616	3.17986	2.4241	2.03957	2.27605
909	chr3:32458604-32467714	2.13866	2.79776	2.03225	2.13047	3.07253	3.36715	4.04793	2.16184	0.223939	1.90477	2.91166	1.57259	0.192295	3.75066	3.50208	2.16673	0.645092	3.0848	2.79899	2.03691	0.277694	1.60194	2.35528	1.60214	0.0412928	2.85279	2.58321	2.01165	0.210359	1.50195	2.33842	1.20874	0.468905	2.42128	2.64421	1.5469	2.90534	2.19468	3.39862	1.39996	2.44542	3.1495	1.56697	3.01828	2.28251	3.63932	3.10772	1.44365
1884	chr5:76881216-76889560	3.60859	4.00254	3.5299	2.39988	0.989872	1.88406	1.56299	1.10861	0.0458427	2.07961	2.51237	2.19889	0.0419892	5.71386	3.3987	2.36562	0.0469537	2.56878	1.73168	1.74994	0.137811	1.53036	1.03848	0.754558	0.180333	4.42609	3.45346	2.9284	0.102075	1.03855	0.904211	0.486203	0.458057	1.74361	2.36987	2.01481	1.3382	1.25015	1.39147	0.781215	1.68625	1.64864	1.17618	0.863824	3.44137	4.74433	4.54061	1.81865
1450	chr4:69191846-69199167	0.665301	3.06118	2.81616	2.4827	0.626763	1.88543	1.22853	1.34502	0	1.30359	1.05186	0.686607	0	3.96158	3.51041	2.22431	0	4.16381	4.58578	3.86422	0	1.05896	0.507245	0.586351	0	4.91993	1.90238	4.69892	0	2.5542	1.57613	3.04773	0	2.94877	3.04473	1.75601	1.69463	2.25597	4.07042	2.20655	1.72165	1.12739	1.76704	1.23976	2.8402	3.24432	3.98077	1.24365
6074	chr1:156180078-156187897	2.66162	2.24803	2.31394	2.40339	1.52581	1.96151	1.43787	1.25937	0.0163068	1.77538	1.86031	1.44648	0.014936	4.36985	3.34353	2.87155	0.275583	2.37574	1.57619	1.7118	0.205888	2.44965	3.37737	2.15944	0	1.80766	2.33403	2.09704	0.108928	2.21655	0.851396	0.963568	0.0862605	2.5209	2.25308	1.73903	2.64451	2.05671	2.5738	1.73982	3.44895	3.61918	3.87953	3.75555	3.48246	2.78457	3.24805	1.85449
6277	chr22:32502707-32510981	0.107033	0.265553	0.101707	0.1117	3.99298	4.17073	3.42419	3.0294	0	2.14963	2.79216	1.48846	0	2.64101	1.55307	1.37174	0.0473509	2.41781	1.48952	1.13973	0.111181	2.53543	2.84258	1.41812	0.318252	3.96758	3.71485	2.5646	0.308815	3.30738	4.72022	2.73176	0	1.8718	1.26014	1.19521	3.09889	1.10314	2.10486	1.57565	1.02739	1.75759	0.53915	1.03245	2.09426	2.69126	1.81148	0.855885
3854	chr12:82368067-82374373	1.54474	2.09049	2.33526	1.36785	1.16421	1.15523	1.99674	1.32489	0	2.0637	1.8317	1.67392	0	1.70105	1.47556	1.21289	0	1.96377	2.6282	2.3154	0.255279	1.51865	1.7012	1.13452	0.0894765	2.169	1.59929	1.88635	0.135058	3.39919	1.19639	2.803	0.106954	2.53028	2.9076	1.80338	2.4264	2.89471	3.49809	2.87625	3.81151	2.36835	3.3247	3.04788	1.49163	2.35402	2.04662	2.19243
3937	chr13:27212362-27220509	1.68487	1.94178	1.91091	1.21004	2.53451	2.212	1.54558	1.35518	0.344308	2.0234	2.25804	1.51166	0.215022	1.70684	1.74044	1.27198	1.15413	1.57853	1.72139	1.23217	2.39943	4.19829	3.64659	2.21302	1.0389	2.91014	1.94533	1.9337	1.56814	1.90339	2.45137	0.924779	1.87653	1.90097	1.8976	1.76007	1.8274	1.44043	1.80514	1.46106	1.83495	1.54377	2.19021	1.24515	1.76229	1.82214	2.04413	1.03479
4715	chr19:36323748-36332422	5.36013	4.45823	3.92922	5.71819	3.91467	4.15524	4.044	4.19696	0.499787	1.15029	3.20596	2.02832	0.013464	1.83217	1.27712	1.50761	0.0451676	1.70229	1.81279	1.68337	0.662842	1.62988	1.95038	1.78164	0.260209	1.94488	1.77178	1.89036	0.760986	2.15583	5.06539	2.00446	0.59615	1.62317	1.24348	1.1686	1.76407	1.10238	1.42777	1.17626	2.29798	2.49217	1.85144	1.84659	2.05477	1.31211	1.43996	1.32182
4426	chr17:11971744-11978102	1.46247	1.45137	1.98528	1.98654	2.0207	1.62822	2.40478	1.36099	0.621654	1.84214	2.15316	1.46258	0.0918382	1.81211	1.67256	2.1343	1.04751	1.94772	1.67096	2.00941	2.92978	1.36278	2.40114	1.89041	1.95239	1.6493	2.03941	1.41584	2.37768	1.86503	1.81481	1.73185	3.96029	1.47623	2.20528	2.13858	1.82118	1.36716	2.06952	2.00582	3.04271	1.6072	2.31528	1.51148	2.25808	1.55651	2.02989	1.64413
3552	chr11:77856368-77862982	1.53976	1.12945	2.0993	1.211	0.555	0.753618	0.679917	0.812059	0.0385546	2.42672	2.00515	2.31797	0.0706273	2.04232	2.47874	2.38744	0.1777	1.87234	1.92756	2.85148	0.382474	3.44749	2.55776	2.07686	0.0568736	2.41268	1.08916	2.04157	0.160963	1.03434	1.00649	2.10294	0.101974	1.91579	1.57636	1.0466	2.501	3.41706	2.3405	2.61378	2.43747	2.3175	2.5629	3.34993	2.09584	1.57109	2.32901	3.26298
4716	chr19:37106674-37115830	1.74102	1.82381	1.79226	1.68236	2.155	1.92638	3.24173	2.08579	0	1.84782	1.7756	1.6196	0.0127553	1.95269	2.41978	1.88637	0	1.71673	2.0887	1.96023	0.0251181	1.69351	2.34345	1.31278	0.0616281	1.79271	1.73097	1.54505	0.116279	1.89291	2.37514	1.89895	0.343773	2.25534	2.23825	2.07917	1.85188	1.99377	2.57843	1.76437	2.91336	2.31806	2.58226	2.2742	2.27105	1.13495	2.7738	1.51006
699	chr2:142929044-142937291	1.02014	1.43868	1.47958	1.23273	1.00151	0.790384	1.7995	0.687464	0.773031	1.89366	1.55628	1.06666	3.00213	1.30074	1.45069	1.73525	0.855106	0.635309	1.23674	2.06561	0.920247	1.60366	2.25149	1.76977	0.3421	3.04071	2.09644	1.71533	0.103275	1.99092	0.538144	1.61631	0.57249	3.3575	1.96178	2.06849	1.80525	3.00404	2.76874	1.23715	2.59466	1.62037	2.92094	3.43119	0.600318	1.80005	1.16112	0.736017
6072	chr1:155650288-155659631	1.42182	1.12883	2.07165	1.48382	1.42429	1.23119	1.44402	1.40529	0.491298	1.76441	1.09899	1.64099	0.787499	1.95614	1.84966	1.5053	1.21608	1.58041	1.81946	2.31171	1.28	1.1715	1.85491	1.28651	1.1475	1.22003	1.49071	1.75502	2.23346	2.09911	1.75758	1.70587	2.21387	2.21021	1.8856	2.11694	2.39025	2.13995	2.4854	2.45709	3.63941	1.80892	2.29185	2.34298	1.58971	1.11224	1.02493	1.84078
5108	chrY:13282562-13289605	1.13164	1.93416	1.67274	2.23076	1.303	1.85096	1.59627	1.60994	0.524994	1.47822	0.8504	1.17761	0.779329	2.19999	2.26487	2.34713	0.445007	1.08204	1.8705	1.33891	2.05712	3.23752	2.46057	2.31607	1.20172	2.39521	3.88674	2.28241	1.29997	1.23037	1.13423	0.658289	1.72374	1.06614	0.867795	1.72	0.704603	1.11079	0.989081	0.764545	1.04046	2.00894	0.570034	1.32659	1.33556	2.3185	2.30539	3.16001
6007	chr1:109702615-109710648	2.59072	2.46167	2.04279	2.79958	3.54155	3.72307	2.9111	3.15742	0	2.86215	3.35524	2.44045	0	1.82997	1.82029	1.68932	0	1.66023	2.11614	1.62834	0.143145	0.170315	0.35956	1.03315	0.257556	2.61088	1.97293	3.36195	0.159039	1.24908	1.54694	1.55115	0.167926	2.45375	1.70074	1.29262	0.926666	1.51497	0.770845	1.65819	1.16768	1.17426	1.05511	1.22958	1.29425	2.40239	1.50302	1.21739
2654	chr7:141752288-141756102	2.32162	2.53441	2.75763	1.696	3.2479	3.21657	2.94735	3.83307	0	1.59214	4.03759	1.44956	0	2.39557	2.20708	0.905556	0	2.74707	1.78255	1.43544	0	1.076	1.73074	0.975315	0	1.79291	1.25903	2.7814	0	0.597828	2.09423	0.607731	0	1.59942	2.82757	1.81475	2.16829	1.36731	1.92769	0.445785	2.0748	2.06073	1.98807	0.699831	3.50428	1.81612	2.94692	0.530421
3397	chr11:7513515-7520474	2.86325	2.65209	1.93478	2.83317	2.96713	3.41602	1.61554	2.27254	0	2.49344	2.70494	2.45588	0.0167816	1.94109	2.16486	1.95	0.0281486	2.94307	2.01521	2.40415	0.297422	1.96596	1.54159	1.35707	0	2.62067	1.93232	1.15498	0.0917903	1.76952	1.14792	1.12427	0.323064	1.61851	1.85986	1.59866	1.30736	1.43647	1.61275	1.18102	1.38999	2.31558	1.34613	1.38096	2.70336	3.05753	2.21356	1.30833
4340	chr16:10419374-10424167	2.12464	2.29187	1.49225	1.54246	3.06327	1.83979	2.43928	2.05428	0	2.17201	1.51728	1.25841	0	2.32078	1.10928	1.44126	0	2.38481	2.57108	1.96731	0	1.99795	1.29122	1.01496	0	1.42677	1.2023	0.939018	0.0888416	2.09327	1.57398	2.9622	0.187611	1.3707	1.80012	1.49573	2.24315	3.4456	2.66437	2.6015	2.62952	3.03381	2.69884	3.39719	1.2394	1.54848	1.30284	1.61806
2982	chr8:144858915-144868670	1.67952	2.11726	1.89789	1.16851	1.64638	2.12256	1.61355	1.62125	0	2.31249	2.6753	1.39133	0	2.72884	2.08952	1.46703	0	1.95312	2.30898	1.80869	0.0707276	2.24405	1.60737	1.46688	0	2.29027	1.62469	1.48315	0.130968	1.77669	1.95634	1.60412	0.0460952	1.78009	1.17941	1.59669	2.07734	2.18325	1.82501	1.91753	1.65271	1.97428	1.55484	1.72408	1.82709	1.67399	2.09133	1.86675
2339	chr6:131294372-131300270	1.50144	2.30958	1.5694	0.887917	3.18962	2.92531	1.60113	2.27656	0	1.6916	2.97385	1.53402	0	2.02077	1.72786	1.29678	0.0664229	2.58412	2.44972	1.90823	0.194953	0.773186	0.699563	0.630755	0.159442	2.78282	3.17553	2.28936	0.216599	0.927905	1.65536	1.22822	0.571755	2.22789	1.8896	1.17363	1.89308	1.84222	2.42774	1.48954	2.43514	1.79916	1.51262	2.03668	2.26629	2.68462	1.34114	1.0291
6032	chr1:119174039-119177639	0.983835	1.70865	1.98663	1.79679	2.29394	2.98176	1.9984	2.65199	0	2.53014	1.78231	1.60551	0	1.54483	1.10759	1.302	0	2.38117	2.00651	1.26729	0	1.13994	2.06279	1.8281	0	1.89946	1.60062	2.32164	0	0.886697	1.23261	1.12673	0.124883	2.34619	1.79737	1.92259	2.64172	2.17284	1.18236	1.02327	1.13975	2.29235	1.85843	2.15012	2.33752	1.92405	1.50321	0.6556
4601	chr19:8379293-8386644	1.92752	1.43468	1.83162	1.34105	1.56051	1.35614	1.7741	2.23255	0	2.59654	2.03693	2.25656	0	1.40521	2.04943	2.2488	0	1.29588	2.42806	2.15182	0.0625697	1.42687	1.57166	1.32364	0	2.29487	1.30663	2.40548	0.0289654	2.10947	1.81119	1.6162	0.0611676	1.78758	2.59214	1.64795	1.35017	1.83288	2.5797	2.00478	1.71462	1.97825	2.00256	1.56153	1.75105	1.61554	1.69908	0.688097
5356	chrX:46478654-46490494	0.93499	1.78157	2.02571	0.988774	1.97658	2.10505	1.97515	1.89024	0	2.30834	2.02355	1.67705	0	2.14766	2.61981	1.20871	0.0165454	1.44829	2.40493	2.2867	0.116547	1.46372	1.70771	1.35362	0.0158863	2.42613	1.66313	1.73794	0.0539532	1.69498	1.98671	1.8846	0.0759572	2.10088	2.27751	1.85846	1.85127	2.4596	2.35355	1.41232	1.535	2.48976	2.03462	2.02928	1.8399	2.4241	1.93408	1.59501
2948	chr8:122830089-122836718	0.601152	0.530305	1.52331	0.604132	0.484526	1.04111	1.4246	1.03528	0.230804	2.29035	1.41979	1.51654	0.0704675	1.67811	1.20315	0.818824	0.0295497	0.934052	0.769279	2.15671	0.138767	1.71984	0.746918	1.33827	0.0851174	1.71944	0.941801	1.21247	0.0642393	3.50879	0.937263	5.33288	0.406972	1.41589	0.705046	1.56635	1.8715	3.73715	4.14499	2.26585	1.32652	1.36364	2.89356	3.06047	0.448093	0.522512	1.06766	1.27172
558	chr2:64252675-64258565	3.98421	3.95399	2.42874	2.82427	2.80444	1.62738	1.9087	1.31713	0.173172	1.76755	3.55895	1.23742	0.594805	2.76547	1.20362	1.54987	0.0332566	1.21295	1.15438	0.826303	0.468524	1.3162	2.38174	1.45757	0.287385	2.47698	1.54915	1.69206	1.15677	1.0066	1.43157	0.590348	0.458025	1.35448	1.77009	1.2172	1.40418	2.73018	1.24837	1.01041	1.14458	2.00178	1.66614	3.30843	0.0840506	0.168017	0.353411	2.061
5407	chrX:57102981-57109396	1.72556	1.98647	0.852647	0.672304	1.57359	2.8689	2.73392	2.00009	0.0198752	1.48767	1.33377	1.05781	0.0728179	1.61022	2.90098	1.23074	0	2.00466	2.58355	1.28029	0.0358488	1.49285	2.70141	1.47213	0	1.77679	2.17102	1.90442	0.165955	2.5594	2.07541	0.903403	0	1.90205	3.08238	1.84982	1.805	1.76152	2.23211	0.574312	1.78199	2.38938	1.11258	1.24837	1.85215	2.23689	2.20655	0.68335
3522	chr11:67619701-67626914	1.16636	0.609218	1.16666	0.811483	2.03567	1.43524	1.80804	2.06842	0.0883832	2.10494	2.66901	1.95128	0	1.92782	1.53576	1.12881	0	1.71687	2.35668	2.23516	0.0318833	1.13804	1.43011	1.42831	0	1.07457	1.73112	1.51547	0.206636	0.948453	2.03042	1.3659	0.0623377	0.975952	1.64485	1.26817	2.12133	1.20513	2.41443	1.80738	2.60082	2.07058	1.85534	1.62841	2.74545	2.19526	2.3665	1.58952
2984	chr8:145055669-145066696	1.68658	2.23172	1.45003	1.98364	2.24714	1.87774	1.71292	2.35433	0.0693793	1.65235	1.35796	1.45878	0.169459	1.90965	1.6074	1.34257	0.195417	1.85743	1.58017	2.23458	0.625697	1.15804	1.60908	1.63508	0.426436	1.90205	1.4373	2.01185	1.06206	1.48904	1.60994	1.86585	1.06024	1.44709	2.02154	1.65916	1.23766	1.61609	0.947645	1.49073	1.19625	1.46141	1.41595	1.35575	1.30206	1.43603	2.45423	1.5291
2556	chr7:92468230-92478006	2.12886	1.70815	1.76469	0.913891	1.64284	1.80422	1.79409	1.19043	0	1.64189	2.18816	1.13124	0	1.38181	2.26633	0.883373	0	1.85148	2.21708	1.89816	0	2.33253	2.74355	1.52228	0	1.86559	1.76859	1.47996	0.0653432	1.39964	1.27116	1.30426	0	1.72826	2.46409	1.89674	1.01529	1.42273	1.74191	0.695784	1.7691	1.92984	1.46023	1.41999	2.02574	1.56916	2.38496	1.65577
4213	chr14:92041755-92049863	1.8022	2.00532	1.34926	1.51983	3.22582	3.16844	2.32953	2.50257	0.0943538	1.44459	2.74379	1.70492	0	2.15606	1.80346	1.64327	0.362402	2.05609	1.78208	1.05051	0.59565	2.13736	1.83206	2.08248	0.162383	1.79947	1.12542	1.90335	0.341398	1.23753	2.02526	0.893488	0.748676	1.6207	1.33027	1.31115	1.17312	1.12572	1.14557	1.39818	1.19303	2.22985	0.880299	1.64623	2.44243	2.80739	2.05396	0.748633
1112	chr3:128919296-128929231	1.06968	1.54812	1.52469	1.58147	1.47799	1.77535	1.99171	1.59188	0.0128341	1.83394	1.24882	1.8215	0	2.59942	3.3005	1.76331	0.295764	1.82185	2.56659	1.83716	0.254636	1.42302	0.830661	1.18105	0.0378642	1.46859	0.580095	1.00321	0.08573	2.38722	1.96557	2.15842	0.316821	2.45643	2.46085	1.54288	1.41531	1.8812	1.63612	2.02542	2.06534	1.5429	1.70628	2.14964	1.44516	1.59386	1.84391	0.814636
3406	chr11:14524558-14527625	1.2991	1.28925	1.37162	1.00426	1.94456	3.24979	1.17279	2.04272	0	2.68687	2.37087	1.39284	0	2.33127	1.5889	2.17165	0	1.08689	2.63217	1.68578	0	0.891986	1.21058	1.30608	0.122627	0.89178	1.0959	1.36249	0.485878	1.04074	1.73609	1.79479	0.219869	1.52988	2.34402	1.93423	1.61774	1.70022	1.2616	0.831488	1.33776	1.79373	1.45419	1.30534	3.87334	2.25831	2.0358	1.20921
493	chr2:26297921-26306401	2.03645	1.7619	1.98474	1.96177	2.59733	2.39644	2.75767	2.18167	0.0150359	1.22776	1.76577	1.09664	0	1.54611	1.72435	2.03673	0	2.02207	1.60368	1.75775	0.271202	1.2907	0.973169	1.11369	0.0443602	1.39794	1.75567	1.66821	0.0251095	1.12946	1.36073	0.683437	0.371175	1.32824	1.95029	1.89504	1.2192	1.1276	1.46043	1.30343	2.07401	2.27109	0.736476	1.41662	2.6856	1.57554	1.91477	0.994161
4279	chr15:55304850-55312434	3.73663	3.65034	3.21783	3.04654	1.33107	0.7078	0.948746	1.18035	0.016812	0.114399	0.620514	0.3314	0.200184	1.78114	1.86962	1.04106	0.929851	1.94692	1.96123	1.48407	0.121295	0.420925	0.544064	0.452816	0.0248002	0.781537	0.823222	0.635886	0.140378	0.902062	1.9311	0.76417	0.444665	1.73267	2.65473	1.85811	2.18116	1.08887	1.42883	0.710014	1.97115	2.1766	1.58813	1.47836	2.67644	2.02264	2.52523	1.02267
3866	chr12:88173235-88183818	1.25524	1.70248	2.10725	0.844209	2.51484	1.55796	2.76216	1.579	0	1.43472	1.5362	1.44873	0	1.05119	1.63296	1.0958	0	1.71031	1.56614	1.40849	0.0651945	0.775684	1.94951	1.05466	0.053319	0.861672	1.54297	1.64054	0	1.20673	1.76135	1.69769	0.0637336	0.886938	1.9025	1.68203	1.99298	1.39639	2.48678	1.15156	2.85295	2.37692	1.51751	1.8919	1.35668	1.87035	1.73102	1.3702
3605	chr11:95609668-95615594	1.49434	1.26056	0.851994	1.14364	0.38714	1.294	1.36591	0.906322	0	1.68361	1.44381	1.39954	0.177358	1.40786	0.972004	1.79026	0.0991637	1.76819	2.00789	2.05321	0.077613	0.69258	0.626633	0.482904	0.222164	2.23113	1.62078	2.06154	0.287435	1.61616	1.49776	1.07573	1.0243	2.53413	4.36802	2.75335	3.76827	3.52034	4.17949	6.07348	1.87955	1.2601	1.80657	2.0721	0.501241	1.50297	1.26455	0.853533
977	chr3:72023117-72028917	2.2902	1.96979	2.75658	1.06226	0.711988	1.18989	1.39558	0.668783	0	2.01934	1.54893	1.38661	0.0201344	2.60289	1.29869	1.40376	0	1.06753	1.97823	1.0489	0	1.72975	2.06301	1.33216	0	1.80795	2.98077	1.77374	0.110129	1.41537	1.22423	0.649466	0.271327	2.58917	1.92153	1.40658	1.21207	1.124	1.33446	0.537476	2.17306	2.23612	1.53817	1.93301	1.70709	2.98591	1.50736	0.348829
4655	chr19:21412131-21418811	2.31997	2.30237	0.755841	2.21361	3.02235	2.12372	1.41372	2.41211	0.229042	0.844209	1.28086	1.05348	0.104894	1.24897	1.52562	0.812574	0.381213	1.42603	2.29022	1.13843	0.481976	1.2971	1.17359	1.71362	0.197091	1.36506	1.50976	1.58824	0.860611	1.09239	1.86022	0.86757	0.841387	0.843049	2.20663	1.33233	1.48577	1.04102	1.33249	0.975788	1.40415	1.05905	1.8698	1.43863	1.92691	1.92594	2.36833	1.41345
838	chr2:233213615-233217829	0.525325	1.45975	5.19154	0.65788	0.979891	0.81881	1.49388	0.495616	0	1.95571	1.01512	0.894543	0.0831316	3.67656	1.47194	1.81487	0.557763	1.3562	1.00837	1.58794	0.272842	1.51493	0.979057	1.4939	0	3.02916	3.87446	2.05973	0.656796	2.05616	0.842441	2.20023	0.266729	0.779496	0.938388	0.997249	0.686884	1.34068	2.38756	1.0087	1.39104	1.1191	0.952626	1.71023	1.29219	1.52636	1.38302	0.640113
3637	chr11:108200410-108203433	1.17156	0.436002	1.53074	0.815098	0.607031	0.887675	1.63605	0.888189	0	2.29555	1.27343	1.24686	0	1.31399	0.732737	1.30563	0	0.787643	2.10827	2.51516	0.0760602	1.50828	0.545863	0.757189	0	1.50793	1.42952	1.91397	0	1.50841	0.587118	4.02516	0	0.776071	0.951252	1.63531	0.957412	2.44369	2.30393	2.62449	2.61751	1.16989	2.21303	1.85407	0.491213	0.32731	1.10156	1.11528
4367	chr16:31763217-31769515	0.632741	1.32566	1.60336	0.342396	0.874264	1.46109	1.71366	0.758042	0	2.20408	1.90196	1.47651	0	1.45088	2.18097	1.2536	0	1.05876	2.42911	1.06257	0	1.37577	1.70336	0.908771	0	1.30305	1.60132	0.91885	0.067615	0.941396	1.26838	1.56431	0.0356965	2.16092	2.34045	1.57015	2.10117	1.72523	2.15068	2.06993	2.37358	1.37289	1.69988	1.65303	1.10049	0.864237	1.05766	1.39208
6033	chr1:119164450-119171266	0.909473	1.61174	1.17287	1.03953	2.22154	1.63133	1.7154	1.88243	0.149648	1.08194	1.6319	1.10621	0.18847	1.69036	1.04013	1.01355	0.689738	1.11807	1.93279	1.42812	0.438621	1.27123	1.51339	0.923688	0.193159	1.13715	1.40918	1.36788	0.312386	1.00369	0.911553	0.892775	0.626697	1.3082	2.3736	1.45084	1.57748	1.27531	0.738123	0.831583	2.06421	1.6722	1.17803	1.48826	1.5253	1.96012	1.89351	0.939992
4611	chr19:9626252-9638082	1.7967	1.56019	1.42275	1.17191	1.24126	1.45858	1.74873	1.236	0	1.83357	1.59128	0.977336	0.0493618	1.47777	1.2361	1.46002	0	1.57031	1.47292	1.44004	0.252733	1.50351	1.22082	0.967686	0.0635988	1.04065	1.54274	1.52199	0.431991	1.50364	1.61322	1.00433	0.513144	1.98363	1.88433	1.48385	1.25853	1.35944	1.40678	1.00623	1.75931	1.46189	1.24443	1.2186	2.21812	1.96602	1.40779	0.855192
6070	chr1:155623851-155626214	0.37466	1.11546	0.712038	0.912331	1.74714	1.78436	1.90256	0.883681	0	0.917637	0.36199	0.850649	0	1.34468	0.374923	1.14822	0	0.806034	1.07875	2.3165	0	0.964684	1.22196	1.93717	0	0.771568	0.406361	1.36018	0	1.92954	2.62862	1.83891	0.475576	1.19129	1.52104	1.25512	1.39967	1.47103	1.14612	1.43881	2.3562	1.49651	2.07598	1.24232	1.25671	1.67477	1.76137	1.99731
5115	chrY:13888666-13897893	0	0	0	0	0	0	0	0	0	0	0	0.0272396	0.0253142	2.41132	4.46617	3.23563	0	0	0	0	0.224323	2.42187	3.21981	3.10162	0.0407693	2.56955	4.00786	2.89211	0	0	0	0	0	0.0508634	0	0	0	0.0471055	0	0	0	0	0	0	0	0	0	2.1563
1495	chr4:88442633-88453881	1.37787	1.64091	1.53377	1.23254	1.42786	1.60222	1.99913	2.20196	0.011336	1.38847	0.874839	0.938519	0.0519157	1.69552	2.04856	1.03102	0.0522485	1.52451	1.51134	1.46045	0.654298	0.689283	2.01769	1.2213	0.367891	0.851269	1.15287	1.25772	0.776166	1.41924	1.4994	1.13359	1.27927	1.25176	1.85396	1.93429	1.32364	1.42977	1.78924	1.00789	1.48548	1.60742	1.26915	1.25791	0.880331	1.71578	1.29555	1.01936
1407	chr4:54020048-54025559	0.803426	1.27573	1.29787	1.28564	1.16561	1.32185	1.22396	1.24527	0	2.51877	1.47489	1.09448	0.0211901	1.8743	1.20598	0.89537	0.10663	1.20993	1.15664	1.32468	0.292098	1.73769	1.19789	1.03852	0	1.73729	1.39425	1.34172	0	1.8206	1.12737	2.83923	0.407932	1.78823	0.587112	1.0766	1.20059	1.8927	1.40443	1.33701	1.06372	1.71154	1.69976	1.79217	0.449149	1.43656	1.20868	1.83559
4336	chr16:8833027-8836478	1.0263	1.14583	1.34095	0.803292	1.46236	1.44414	1.82408	0.864518	0	1.63388	1.48739	1.09227	0	1.38129	1.41215	0.285937	0.113508	1.93196	1.60062	1.76266	0.333149	1.71765	1.5541	1.16079	0	1.05677	2.22627	1.11777	0.0616899	1.84994	2.05729	0.839547	0.0651368	1.3597	1.56246	1.21767	1.31797	0.881467	1.45764	1.14955	1.18895	2.04968	1.42167	1.23748	0.573745	1.72037	2.05058	0.879297
3341	chr10:100380920-100388398	1.954	2.29176	1.40665	2.05982	2.14762	3.28151	1.92439	2.07494	0.409207	0.870154	1.1442	1.34439	0.015617	1.32822	1.48134	1.22079	0.0523905	1.84712	1.07976	0.691534	0.461304	0.54886	0.66213	0.995006	0.30182	0.365822	1.02756	0.988845	0.370156	0.853857	1.95847	0.503751	0.420903	1.31792	1.63464	1.22324	1.10604	0.755577	0.569283	0.492684	1.7639	1.05117	0.715839	1.17803	2.51577	2.38216	2.33833	0.946978
3090	chr9:85880976-85886282	1.0848	0.745319	1.03082	0.928908	1.2971	1.51743	0.508496	0.731036	0	1.63504	2.25748	1.04203	0	1.57234	1.33607	1.11595	0	1.97476	1.92211	1.60516	0	1.20321	1.08864	1.61796	0.141782	0.94516	1.17659	1.63591	0	1.80497	1.75638	2.67586	0.084738	1.06132	0.948563	1.025	1.24696	1.72008	2.26095	1.54888	0.773366	1.1851	0.588473	1.76079	1.3995	1.5853	1.56921	1.58875
2981	chr8:144871551-144877827	0.987714	0.980223	0.938569	1.27621	1.24288	1.89386	1.07479	1.8542	0	1.79709	1.70413	1.12128	0	1.32936	1.55321	0.864873	0	1.59371	0.744829	1.26017	0.146571	1.45325	1.18338	1.59592	0.029968	1.81614	0.918245	1.84414	0.067852	0.726689	0.707123	1.84682	0.322395	1.34596	0.744695	1.22113	1.51551	2.49304	1.54158	1.30953	0.980784	1.56557	1.63476	1.40362	1.02547	1.10379	0.928699	1.88053
559	chr2:64886312-64899831	0.818877	1.00771	0.747007	0.865982	1.96872	2.09891	1.3972	1.52306	0.0282957	1.6366	1.67731	2.02655	0	0.675968	0.786673	0.93084	0	1.3389	1.25748	1.32765	0.0170123	0.978326	1.00726	1.0585	0	1.48401	0.888163	1.61725	0.141759	2.22673	1.80565	1.95066	0.0498933	1.2498	1.35638	1.42649	1.28486	1.44682	1.43144	0.85956	1.77805	1.71538	1.45196	1.48106	1.4283	0.768695	0.800748	1.3221
4744	chr19:47047398-47055397	1.3839	0.274681	1.78846	2.3108	1.26202	0.479345	1.74284	1.38025	0.398498	0.542323	1.28362	2.19946	0.0583999	0.745034	2.2158	1.91242	0.538765	0.595458	1.16882	1.5592	1.17878	1.02623	1.2896	1.5742	0.282164	1.59599	0.480319	1.12541	1.22448	1.02632	0.83224	2.06491	1.34911	0.880064	0.898933	1.29811	0.775504	1.57575	2.12883	1.48809	0.329806	0.737031	0.780756	0.667464	0.804606	0.618617	1.30122	1.77061
4352	chr16:20674233-20681995	0.969783	1.47195	0.487869	1.58757	1.18232	0.642173	1.1008	1.23017	0	1.11776	1.10234	1.65138	0.0150457	1.79149	0.970463	0.762892	0.0252369	1.65682	1.25926	1.2149	0.0888855	1.52759	1.75424	1.17982	0.0969261	2.46707	1.29933	1.78108	0.219455	1.76276	0.686118	1.04531	0.173788	1.33017	0.880058	1.14664	1.54508	2.18381	1.64537	1.02234	0.793041	1.16462	1.03448	0.722233	1.84969	0.637503	1.23367	0.999222
1643	chr4:143177946-143180459	1.05692	2.62226	1.50649	1.71579	2.37307	2.44058	1.96795	2.61157	0	1.03546	1.87215	0.899881	0	0.790278	0.881382	0.785247	0	1.3264	0.676255	0.60508	0.18298	0.907125	1.6415	0.455398	0	0.544149	0.191058	0.895317	0	0.181441	1.589	0.230558	0.71552	0.933508	2.0024	0.68847	0.987117	1.21035	0.307924	0.67648	0.699668	1.25086	0.532394	1.48679	1.96954	1.57484	2.48442	0.939067
2382	chr6:158156792-158169360	1.6912	1.99307	2.27666	1.32372	1.49698	1.2509	1.46713	0.831021	0.192765	1.5188	1.56593	1.09994	0.0650488	1.07486	1.33981	1.31539	0.124697	1.2507	1.11591	0.726154	0.951573	1.77811	1.54313	1.25244	0.972799	1.19722	1.03179	0.71631	0.457454	0.943568	1.23599	0.415038	1.00181	0.821552	1.57344	0.747541	1.21754	0.864606	0.95464	0.834392	0.746372	1.00077	1.63281	0.80718	1.26061	1.10248	0.927591	0.724481
5409	chrX:57204834-57209137	1.23471	1.94013	1.46659	0.930621	1.81263	1.15827	1.35849	1.59478	0	1.10884	1.19295	1.46008	0	0.830893	0.92668	0.860004	0	1.32816	1.77753	1.20167	0	1.58958	1.24645	1.26351	0	1.16542	1.11598	1.49418	0	0.95383	1.03128	1.01003	0	1.4177	1.08607	0.976628	1.63365	1.51495	1.70868	1.51469	1.56661	1.64394	1.2439	1.73689	0.805296	1.26483	0.870702	0.783595
1638	chr4:139442392-139449817	1.01379	1.12447	1.41669	1.32769	1.11237	1.34263	1.51416	1.84862	0.583848	0.759516	0.806654	1.28628	0.487584	1.12367	1.31289	1.39565	1.82037	1.47541	1.1447	1.27003	1.146	0.859875	1.556	1.46462	0.329305	1.22811	1.16425	1.4289	1.06104	1.10565	1.2552	1.01469	2.21037	1.70656	1.79157	1.39845	1.05823	1.4634	0.573346	1.41226	0.67112	1.32333	0.961264	1.43811	0.466738	0.99965	0.95322	0.999152
3213	chr10:26988117-26999252	0.954415	1.22344	1.43597	0.913033	0.906622	1.13638	1.65592	0.535976	0	1.05192	1.84428	1.10605	0	1.14181	1.19386	0.99716	0	1.15498	2.44268	1.28403	0.0413086	1.51543	1.59347	0.848166	0.135136	1.18749	1.16457	1.21273	0.0956149	1.06499	1.39504	1.32726	0.222106	1.89669	1.22699	1.13238	0.779961	1.52235	1.98118	1.09448	1.26362	1.58843	1.28203	1.19875	1.06712	1.33323	1.45826	0.908565
4791	chr19:57513039-57518511	0.809151	1.60603	1.07645	0.900734	2.09627	1.75167	2.62972	2.07206	0.0465994	1.66472	1.64175	1.79121	0	1.37944	0.971663	1.12719	0	1.39263	1.86381	1.27853	0.0840512	0.333347	0.980219	0.679851	0.0687409	1.24976	0.965376	1.11628	0.0778196	1.33351	2.1897	0.741342	0.616259	2.14401	1.83959	1.17463	1.13357	1.19136	1.06083	0.621477	1.0713	0.861867	1.30428	1.02443	1.53799	1.71807	1.97809	0.924336
4770	chr19:52898515-52905434	1.02393	1.33371	1.45947	1.02406	0.72949	0.720402	1.16991	0.690015	0.110566	0.752356	1.73128	0.653844	0.0337572	1.20584	0.960605	0.927148	0.084934	1.17026	1.10556	0.747396	0.565044	2.4387	1.90831	1.48899	0.244651	1.12022	0.763512	0.882859	1.41559	1.25241	1.41112	1.59145	0.844821	1.08524	1.45492	0.964739	0.956305	0.753796	1.11867	1.26977	1.14384	1.30649	0.838136	0.810216	0.930181	1.07275	1.02292	0.877264
2550	chr7:87322848-87330901	1.15468	1.47333	1.04498	1.22417	1.36752	1.23794	2.28959	1.51921	0.126664	0.646425	1.43439	0.811464	0.522075	0.838711	1.98085	0.70469	0.681103	1.53781	1.05544	0.868809	0.799624	0.849458	1.79334	0.995044	0.747393	0.849261	1.07347	0.718629	0.687458	0.622991	1.43288	0.50377	1.06089	0.932441	1.16078	0.828904	1.33519	0.917521	0.865047	0.281545	0.691589	0.97612	1.21868	0.497242	1.22956	1.22894	1.08569	0.628121
4354	chr16:25140797-25149484	0.815559	0.505859	0.77498	0.815661	0.475396	1.10346	0.776528	1.0305	0	1.24844	0.689481	1.4177	0	1.05192	0.816131	0.710071	0	1.15144	1.07626	1.71587	0.052948	0.997462	0.52249	0.922432	0	0.99723	0.995135	1.51743	0	0.787539	0.561979	1.9681	0.0517616	0.864397	0.703585	1.10993	1.19015	1.9513	2.27211	2.28374	2.12582	0.904888	1.90003	2.18186	0.854873	0.683554	0.862684	1.78567
3842	chr12:75371091-75377752	1.32948	1.18745	0.821163	0.554981	1.58437	0.978548	0.877656	0.851126	0	1.56299	1.22029	1.28287	0	0.656089	1.59649	0.851932	0	1.57311	1.53117	1.78102	0.0690502	0.821559	1.61055	1.11703	0	1.02671	0.937277	1.35144	0.127862	0.753162	1.26589	1.04405	0.0337515	0.986363	1.18742	1.0021	1.49001	1.63123	1.91729	1.10621	1.62818	1.5341	1.40635	1.3225	1.11485	1.04	1.37505	0.759365
6123	chr1:183613210-183622443	1.05509	0.666327	1.04816	1.43476	1.24246	1.12127	1.21769	0.937244	0.262385	0.939698	1.06574	0.925543	0.0126489	1.03275	1.00783	1.20255	0.212166	1.3413	1.2888	1.21905	0.821984	1.33363	1.25133	1.27084	0.101857	1.679	1.14436	1.18395	0.276743	0.642176	1.34591	1.60065	0.219154	1.01661	0.856683	1.07108	0.806242	0.753198	1.29942	0.675308	1.36516	0.595968	1.30452	0.780659	1.39416	1.92941	1.35279	1.27833
2749	chr8:23416108-23422118	1.1051	0.658029	0.840088	0.768858	0.839806	1.85007	1.272	0.992951	0	0.721774	0.854179	1.12908	0	1.52039	1.17959	1.31367	0	0.633993	1.20204	1.82207	0	0.986413	1.23575	1.14277	0.0625884	1.74479	1.11869	1.44431	0.247991	1.06238	0.812256	1.39819	0.0374068	0.624678	1.19638	0.946092	0.963306	1.30168	2.57568	2.26341	1.46312	0.719334	0.816438	1.33248	0.658982	1.23497	1.24688	1.12214
4421	chr17:6875146-6881530	0.832292	1.17014	0.724974	1.73717	1.86872	1.021	1.12705	1.26197	0.0199717	1.42694	1.34024	1.10231	0	1.30687	1.87397	1.27537	0.153418	0.969892	1.46446	1.04826	0.0360229	0.714334	0.904841	0.537918	0	1.07125	0.451357	0.906474	0.133409	0.642957	1.25129	1.18013	0.352157	1.47022	1.74577	1.58772	0.712549	1.22544	1.51551	0.75467	1.10194	1.47753	1.39748	1.33806	0.620382	0.542561	0.782563	0.581026
943	chr3:46426677-46433564	0.321464	0.12761	0.244375	0.134193	0.0666254	0.668076	0.326484	0.433263	0	0.125975	0.124237	0.182467	0.186527	3.46125	3.08822	1.64796	0	0.0691589	0	0.132506	0	0.198651	2.57621	0.332424	0	0.728218	1.04599	2.70756	0	0.132446	0.193319	0.0841497	0	0.136286	0.104406	0.143588	4.20327	3.59717	3.98973	2.71594	3.66026	3.70941	0.971573	1.93805	0	0	0.241805	0.0489633
2677	chr7:152027505-152035945	0.78696	1.09339	1.04693	1.53305	0.815512	0.817742	0.905818	1.52026	0	1.07938	1.11518	0.833819	0	1.271	1.26002	1.02319	0.208889	1.07226	0.704937	1.54983	0.108995	1.24279	1.12445	1.08506	0.222852	1.18848	0.853546	1.33327	0.0252285	0.864623	0.578424	1.47635	0.186467	0.834085	0.894567	0.937364	0.881985	1.75091	1.60492	1.51108	1.11138	0.977935	1.1628	2.21407	0.938547	1.17259	1.03592	1.5982
3016	chr9:21922276-21931725	0.468623	0.883631	0.75702	0.423851	0.825563	0.892748	1.6182	0.663181	0	1.69871	1.4036	0.74479	0	0.883003	0.844113	1.27952	0	1.20982	2.02394	1.31996	0	1.35141	1.48475	1.12064	0	1.49586	1.52482	0.918704	0	1.3998	1.45605	1.99341	0.0713817	1.09271	1.33175	1.59606	1.66316	1.47196	1.06493	1.28975	1.1168	0.873519	0.991437	1.27136	0.681148	0.576066	0.704997	1.32049
5440	chrX:64842539-64850853	1.1717	1.74422	1.1134	1.11163	2.42842	1.84474	1.35227	1.1485	0	1.82622	1.74957	1.57199	0	0.334511	0.106593	0.267093	0.3063	3.03637	1.94239	1.53672	0	0.109706	0.248149	0.172109	0.0904916	0.274201	0.346592	0.348036	0.486604	1.64573	1.86833	1.35931	0.108167	1.41121	1.29732	1.33814	2.48708	1.72516	2.51368	2.07939	1.23399	1.70186	0.804834	0.995376	2.67966	4.34482	3.50538	0.202802
6119	chr1:178553828-178560028	0.571325	0.496118	0.88221	0.645927	0.814074	1.17498	1.01543	1.01065	0.0822572	1.32935	1.10401	1.98629	0	0.44855	0.929055	0.955061	0	0.998672	1.98771	1.4228	0.111275	1.83883	2.06303	1.33854	0.151677	0.514752	0.387291	1.50377	0.0686836	0.956274	0.501053	0.607572	0.0725213	1.66523	1.39167	1.03673	1.33399	1.3319	1.49806	1.00561	2.17471	1.14103	1.65479	1.29166	1.19773	1.11732	0.805784	0.652655
3387	chr11:4454469-4464776	0.386655	0.639537	0.530713	0.239121	0.667805	0.930044	1.00355	0.579029	0	0.84179	0.581123	0.731568	0	0.578218	1.07479	0.76605	0	0.878052	0.700956	0.767374	0.0892534	2.25662	2.52215	0.832996	0.0182489	0.92898	2.09685	1.31014	0	0.619518	0.516718	0.477959	0.0218134	1.50263	1.88368	1.51119	1.08336	1.01208	0.826089	0.522454	2.01925	1.44908	2.25064	1.89076	0.720521	0.960212	1.73697	2.1594
2372	chr6:150849238-150856692	0.772238	0.707428	1.12894	0.661263	0.677139	1.02877	0.723968	0.720559	0	1.9205	2.00879	1.78705	0	0.6396	0.475556	0.662009	0	2.55596	1.31128	1.714	0	1.40716	1.05175	0.806246	0	1.77383	0.644291	1.50961	0	0.978978	0.95262	0.97187	0	1.69992	1.01288	0.995006	1.1096	1.51602	1.40183	1.14062	1.92688	1.37091	1.43629	1.46833	1.19551	0.796609	1.06122	0.814308
5463	chrX:71264576-71272620	1.15598	1.58424	0.889228	0.536172	1.93948	2.24032	1.56537	1.89186	0.0158507	1.34822	1.54236	1.2498	0	1.28417	0.991531	0.705478	0	1.95402	1.47927	0.680698	0.0285899	0.907102	0.718137	0.782695	0.0701464	1.02025	0.835856	0.599527	0.132351	1.30407	0.937929	0.900595	0.0279493	1.05017	0.983295	1.01424	1.13104	0.594354	0.384895	0.598952	0.947444	1.17265	0.443651	0.929223	1.53866	2.09153	1.65624	0.586902
3929	chr13:20678765-20685230	1.2328	1.90314	0.846054	0.667105	1.20655	0.652371	1.11294	1.29231	0	1.47617	1.12494	1.0885	0	0.798882	0.685368	1.22123	0	1.10509	1.44612	0.988079	0	0.564309	1.27644	0.44265	0	1.41044	1.18854	1.49186	0	0.987627	1.09833	1.47909	0	0.508131	1.33464	1.18544	0.831554	1.14286	1.61624	0.613707	1.22415	0.911885	1.37998	1.61034	1.14864	0.765378	1.09474	1.35613
934	chr3:44329728-44340878	1.1517	1.85239	1.28309	0.939435	0.905403	1.34119	0.726013	0.990222	0.160099	0.739244	0.882528	0.76643	0.0837951	1.14028	1.11277	1.17285	0	1.11071	0.571733	0.654795	0.598168	2.08602	1.77637	1.38604	0.0674771	0.858751	1.80911	0.605549	0.0954862	0.777213	0.796092	0.441826	0.504108	1.13648	0.935129	0.842601	0.890185	0.311857	0.41653	0.457538	0.762413	1.30429	1.00024	0.454912	1.68733	2.04153	2.12843	0.665385
5947	chr1:84185857-84193548	0.403008	0.742768	0.930037	0.320444	1.13357	1.2962	1.46179	0.698358	0	1.4101	1.05689	1.01305	0	0.46492	1.15226	0.417048	0	0.805091	0.828835	1.14701	0	0.711548	1.55584	0.893034	0	0.711383	0.561995	1.21228	0	1.00812	0.577043	1.43173	0	0.976324	1.26215	1.18936	1.4518	1.97792	1.40896	1.54767	1.98185	1.58419	3.07407	2.25612	0.708082	0.386032	0.757858	1.75382
1876	chr5:71209040-71229599	1.46467	0.619903	1.08478	1.06399	1.6071	1.93976	2.73447	2.40952	0.124046	0.991797	0.936491	0.929176	0	1.25622	1.33637	1.63229	0.00952891	0.857274	1.21968	1.42055	0.0894965	0.887359	1.12401	1.44779	0	0.554471	0.677492	1.01656	0.0103577	0.643392	1.25214	0.634315	0.174982	0.593558	0.577136	0.769678	1.02596	1.05712	0.997772	0.868533	1.49717	1.45303	1.38878	1.50634	0.891063	1.17946	1.21514	1.45993
1824	chr5:42813507-42819811	1.40475	1.32439	1.00114	1.07508	0.800646	1.21642	1.14135	1.04132	0	0.963366	0.542899	0.677753	0.11115	0.75626	0.773156	0.939307	0.0310729	0.60443	1.14599	1.25457	0.0364799	1.01276	1.17813	0.998697	0	0.650907	0.533264	1.42796	0.0675506	0.795808	1.12637	0.919307	0.0713251	1.11666	1.42575	1.17649	1.31198	0.758379	0.798063	0.449556	1.48789	1.18455	0.849129	1.48208	1.17798	0.941906	0.792493	0.909343
3895	chr12:105302834-105309240	0.622075	1.30331	0.656804	0.480892	0.859527	1.1372	1.26358	0.558948	0	0.541731	1.06851	0.666963	0	0.682202	1.38336	0.500692	0	1.56137	0.796054	0.759755	0.143597	1.99327	3.09166	2.14429	0	0.640545	1.64929	0.853175	0.199426	0.783138	3.25604	0.859438	0.0701896	0.51281	0.617341	0.617472	1.35565	0.814152	1.5103	0.530879	0.686345	0.429465	0.696342	0.375038	0.231844	0.849669	0.649897	1.68445
5957	chr1:88927206-88930795	1.72699	1.22421	0.937748	1.8023	1.66181	1.8159	0.876979	1.82883	0	0.966816	1.43021	1.1203	0	0.885463	0.987541	1.71841	0	1.45962	0.828743	0.677959	0	0.63524	1.14951	1.11617	0	1.14317	0.535174	1.07481	0	0.762355	1.85457	0.484365	0	0.915202	1.60255	0.826493	0.806467	0.484333	0.431265	0.868495	0.734944	0.54747	0.497099	0.520585	0.965459	0.964973	1.15986	0.751553
933	chr3:44340864-44350393	0.929378	1.06068	0.883136	0.549614	0.963097	0.804776	1.17987	0.563669	0	0.500781	1.48161	0.553903	0	0.875591	0.697522	0.750908	0.308365	0.899748	0.936575	0.702325	0.0724048	2.63228	2.38163	1.6218	0.0197387	1.29191	1.36082	0.910992	0.0446912	1.00514	0.698627	0.63862	0.0707825	0.640271	0.905536	0.700524	0.6944	1.04909	0.852914	0.475878	0.861333	0.866186	0.795854	0.896489	1.71455	2.44071	2.40308	0.601617
3316	chr10:89284720-89291763	0.817296	0.686313	1.07533	0.612365	0.651499	1.25212	0.383105	0.338934	0.0362065	0.985482	1.21486	0.927816	0	0.846149	0.754956	0.59554	0	1.96119	1.32745	1.33891	0.130611	1.42451	1.64038	0.772023	0.0267049	1.94206	1.7729	0.912966	0.0302319	0.84183	0.630127	0.864004	0.127684	1.46594	0.816748	1.08816	1.11562	1.48105	0.824234	1.1267	1.04046	1.06028	0.760045	1.5161	1.12468	1.26463	0.945801	0.670305
3189	chr10:5863493-5868824	1.41193	1.23637	1.18384	0.693415	1.72136	1.36647	1.18093	1.84701	0	0.569582	1.52468	1.13143	0	1.19235	0.831131	0.833036	0	1.5188	1.59425	0.62764	0.0431369	0.684325	0.851349	0.536792	0	1.02625	0.630576	0.844271	0	0.769933	0.665958	0.380473	0.0421703	1.2324	0.876679	1.48393	0.698128	0.815246	0.653328	0.637911	1.04465	0.810937	1.42245	0.65094	2.32156	1.29942	1.40566	0.442764
2476	chr7:43853008-43866752	0.902129	1.21503	1.07155	0.963886	1.06841	0.697482	0.818052	1.06389	0.454597	0.694426	0.778233	0.914393	0.560843	0.925082	0.612588	1.16694	1.31132	0.623834	0.803979	0.996038	1.12116	1.19459	0.600469	0.812112	0.62954	0.431281	0.768789	0.725205	1.40988	1.22788	0.904192	1.05424	1.53773	1.26349	0.601687	1.07934	1.14346	0.664131	0.704002	0.989841	0.767828	0.943743	0.746553	0.815816	0.792516	0.504075	0.878522	1.17777
1115	chr3:129901265-129907244	1.40704	1.39637	1.05555	1.54569	1.91854	1.85967	1.42902	1.64686	0	0.652965	0.787056	0.882726	0	0.598021	1.1116	1.19668	0.0327616	0.955919	1.27934	0.814005	0.0769251	0.686442	1.72522	1.00511	0	0.457522	0.803208	0.806555	0.0356109	0.305112	1.18759	0.193854	0.188004	0.706406	1.68362	0.702911	0.276657	0.944977	0.388355	0.189595	1.22559	1.24893	1.04449	0.669696	1.65599	1.24137	2.08891	0.676775
2338	chr6:131323296-131329145	0.605605	1.05177	0.935143	0.684683	0.784471	1.11437	1.15324	0.867237	0.196183	1.48328	1.38967	0.773436	0	0.81508	0.530276	1.18109	0.0669793	1.6286	1.67104	0.936106	0.157269	0.779662	0.493796	0.293556	0	1.87076	1.23159	1.04434	0.218414	0.857704	0.531116	1.33759	0.384363	0.64187	1.16784	0.84533	0.636311	1.33751	1.12479	1.30821	1.35305	1.14229	1.37276	1.59735	0.253919	0.761374	0.640598	0.288256
3192	chr10:6824519-6833532	0.589548	0.828858	0.746952	0.444353	0.763672	0.510507	1.24741	0.695259	0	1.9734	1.85123	1.64529	0	0.440816	0.639124	0.301132	0	0.528474	0.990188	0.675026	0.102066	0.252997	1.83125	0.698556	0	0.657639	0.746002	1.24852	0.0472495	1.77113	2.36358	1.15745	0.0748343	0.989348	1.83496	0.49375	1.23888	0.675133	1.54584	0.44023	1.39848	0.610513	1.13838	0.651618	0.274652	0.658833	0.785291	1.08504
4769	chr19:52751426-52755047	0.489065	0.849373	0.697097	0.425327	1.01362	1.27049	1.11758	1.56549	0	0.598921	0.590658	0.5552	0	1.53587	0.856464	0.613163	0	0.789122	0.938767	0.503977	0	1.38518	1.93689	1.65946	0	1.13307	1.72395	1.33164	0.470355	0.251873	1.71564	0.5601	0	0.388764	0.992748	0.887457	0.913533	1.08012	0.427455	0.391283	0	0.217053	0.862238	0.221137	1.09363	1.50299	0.804727	1.02426
3687	chr12:8281117-8291582	1.18477	0.797851	0.924778	1.32475	0.570027	1.13584	1.07435	0.655831	0	1.28508	0.776761	1.05677	0	1.29084	0.93154	1.10815	0	0.455156	0.365492	0.465101	0.0219765	0.522953	0.906885	0.492252	0	1.5685	1.92752	1.59759	0	0.348666	0.339279	0.35998	0.0214841	0.313928	0.515345	0.33075	0.158075	0.166134	0.295861	0.162495	0.392151	0.300465	0.298397	0.280608	1.18274	2.26972	1.90968	0.386691
3167	chr9:131680373-131686728	0.627067	0.276583	1.25794	0.48475	0.433212	0.42233	1.20296	0.51648	0	0.955636	0.538543	0.632767	0	1.37535	1.32474	0.854123	0	1.34906	1.27053	1.3881	0	1.00463	1.55823	0.900621	0.147978	1.21963	0.528985	1.01179	0.335043	0.861188	1.257	1.00312	0.176882	0.369232	1.07487	0.70023	0.845945	1.09425	1.64421	1.42704	1.52208	0.989511	0.912509	1.42818	0.623212	0.545037	0.917156	0.742862
2007	chr5:143088591-143095011	0.413813	1.09513	0.589835	0.67178	0.428826	0.716666	0.840551	0.743639	0.0794389	1.28381	0.733001	0.469771	0.0909514	1.05201	0.759189	0.4996	0.061023	0.890266	0.860512	0.805479	0.0358209	2.05995	1.28538	1.15896	0	0.923214	0.598435	1.00155	0	0.497274	0.622138	1.30891	0	0.950285	0.895993	0.962697	0.837382	1.08317	1.32617	1.05944	0.913132	0.857058	1.04224	1.33056	1.00247	1.07904	0.64848	1.10301
3318	chr10:90080051-90086792	0.13137	0.586682	0.312084	0.182799	1.63364	1.42197	1.53435	1.19514	0.0378283	1.93055	1.20581	0.70839	0	0.530431	1.18316	0.549015	0	0.565252	0.567375	0.451252	0.0682308	1.75892	1.3466	0.636793	0	0.811623	0.78367	0.524624	0.221103	1.01485	1.51421	0.902706	0.033351	1.46199	1.28	0.843512	1.65637	0.773698	1.32044	1.05104	1.95673	0.874555	2.24992	1.66321	0.440649	1.5415	1.11169	0.450213
4905	chr21:42800846-42806578	0.231737	0.843256	0.734021	0.698656	1.04063	1.20401	0.549164	1.0411	0	1.28652	1.04487	0.78922	0	1.17826	0.927596	0.903897	0	0.997104	0.518958	0.689874	0	1.43203	0.935765	0.698944	0	1.74986	0.58647	0.897391	0	1.98911	0.541955	1.41544	0	1.1462	1.12896	0.776324	0.937873	0.682401	1.48532	1.48323	1.4318	1.02848	0.933849	1.53681	1.20914	1.12221	0.653672	0.588277
3112	chr9:94266124-94270214	0.649497	1.07428	1.23436	0.376567	0.897415	1.49978	1.0994	0.802431	0	0.742364	1.77801	1.10599	0	1.74831	0.974928	0.784143	0	1.6302	1.24672	1.18987	0	1.11489	0.706112	0.76959	0.137944	1.11463	1.05668	1.10038	0	0.557495	1.08497	0.637571	0.274813	1.03259	1.31841	0.846157	1.31431	0.63753	1.22996	0.346425	1.36154	1.34519	0.327167	0.913664	0.242064	0.483885	0.712472	0.989272
673	chr2:127369875-127377853	0.333011	0.165242	0.949324	0.540607	0.172546	0.288364	0.732792	0.448825	0.25571	0.924376	0.697123	0.850595	0	0.497997	1.05527	0.773167	0	0.298513	0.745754	1.2964	0.0576529	0.457303	1.0344	1.11201	0	1.37159	1.20396	1.08808	0.0800677	0.628847	0.389401	1.6708	0.0281805	1.00003	0.225325	1.02263	0.98489	1.5799	2.42549	1.98934	0.845056	1.28088	0.559151	2.47612	0.310278	0.372147	0.260928	1.85981
617	chr2:96217293-96220998	0.597475	0.830121	1.02194	0.498824	0.866813	1.24169	0.485445	1.44948	0	1.63897	0.461816	0.813923	0	1.28662	0.956631	1.13194	0	0.899775	0.917489	0.738831	0	1.10764	0.668115	0.308923	0	1.10739	0.518423	0.520583	0	1.60007	0.479073	0.938408	0	1.01321	0.873222	0.600467	1.22764	1.05564	0.626649	1.14724	1.10746	1.06067	0.601925	1.51287	0.801634	1.06831	1.12355	0.819032
4164	chr14:59443912-59453014	1.02162	1.83463	1.98781	1.0831	1.31076	0.589768	0.741127	0.655677	0	0.810238	1.08108	0.883635	0	0.611109	0.778924	0.759023	0.021522	0.523307	0.840435	0.668426	0.176869	0.851779	1.22401	0.911821	0.0206645	0.901674	0.897003	0.777109	0.397694	0.901962	0.731398	1.24164	0.0988036	0.515619	1.14552	1.00501	0.908716	0.811789	1.10552	0.809576	0.966146	0.906817	0.931208	0.762564	1.03347	0.706757	0.731871	1.51902
2124	chr6:35561857-35567823	0.371081	0.368267	0.634712	0.413082	0.384545	1.41385	1.13063	0.500137	0.0641122	0.363548	0.501945	0.842523	0.0195743	0.732507	0.44561	0.578967	0.32833	0.718501	1.2109	1.01972	0.154185	0.6115	0.553273	0.959334	0.220675	0.917037	0.724463	0.916087	0.356885	0.687998	0.446316	0.874243	0.113048	1.80919	1.20521	0.704442	2.14876	1.01988	0.908136	2.1851	2.16174	0.856391	0.672921	3.13206	0.497881	1.32701	0.488474	0.508687
2829	chr8:54070288-54074793	0.786238	0.390138	1.40085	0.683771	1.01845	1.27655	1.19778	0.662298	0	0.673993	1.5193	1.05991	0	0.617279	0.590092	0.657161	0	0.845746	0.565947	1.28283	0.153133	0.506106	1.00741	0.635192	0	0.708384	1.17255	1.42719	0.0945199	0.91107	0.197009	1.28634	0	0.83332	0.797988	1.09747	0.917892	0.96469	0.687191	0.754847	0.520481	0.436178	1.18814	1.00727	0.659311	1.42779	0.924077	1.19755
2022	chr5:154878590-154886115	1.58875	1.16792	0.503233	0.982537	1.46346	2.03814	1.25499	1.30856	0	0.980016	1.1939	0.667995	0	1.21433	0.824372	0.393458	0.0520633	1.39251	1.07301	0.72764	0.213931	0.727243	1.42566	1.02682	0.0999784	0.545306	0.893497	0.726321	0.19807	0.606089	1.29749	0.577621	0.418274	0.748394	1.28999	0.394248	0.824346	0.519825	0.617157	0.338959	0.818015	1.20129	0.237123	0.319276	0.789491	0.723336	1.32784	0.627376
2411	chr7:5021037-5028572	0.940231	0.816462	0.837608	1.18566	1.52241	1.01772	0.656504	1.38603	0	0.978715	1.64654	0.767175	0	1.31818	0.823279	1.21155	0.0519943	1.5803	1.29719	0.847787	0	0.423662	0.985682	0.34182	0.0499229	1.87578	1.21099	1.53605	0.0282581	0.423699	0.883482	0.49994	0.119348	0.622834	1.24057	0.787449	0.603719	0.173045	0.359531	0.376121	0.427915	0.938893	0.532818	0.566848	0.854147	0.722376	1.71285	0.850309
1350	chr4:25238665-25247155	0.156465	0.362317	1.53636	0.362863	0.216189	0.406464	0.741575	0.421762	0	0.868637	0.503913	0.592078	0	0.655155	1.14822	0.523113	0	0.67323	0.90101	0.752434	0.0270882	1.23547	0.874821	0.842708	0	1.18148	1.86674	0.946728	0	0.805811	0.679566	1.16048	0	1.82418	0.592866	0.902724	1.26648	0.716718	2.18807	1.26851	1.48462	1.94435	0.840695	1.19485	0.233255	0.407991	0.539427	0.873832
2449	chr7:29636375-29646231	0.943474	0.356693	1.02461	0.468866	0.605245	0.583559	0.638806	0.333037	0	0.528183	0.390672	0.484525	0	1.33028	0.674382	1.00138	0.238508	0.531605	0.862385	0.83335	0.0933371	1.4807	1.17225	0.813035	0	0.78644	0.877116	0.913392	0.0432086	0.555312	0.31521	0.705639	0.0456229	0.904736	0.510706	0.852877	1.00705	1.23479	0.863886	1.12147	1.30862	0.917208	1.35786	1.30012	0.552558	0.953939	0.887102	0.513228
869	chr3:14225211-14230183	0.267152	0.530251	0.761578	0.123912	0.461407	0.308446	1.17574	0.300052	0	1.48313	0.516235	0.758194	0	0.479411	0.89113	1.09166	0	0.287372	0.427334	0.795304	0.046251	0.0917157	0.414913	0.287771	0	0.550167	0.676097	0.775902	0	1.28413	0.624779	1.5152	0.0904292	0.755066	0.795356	0.994406	0.415848	0.961508	1.24532	0.854952	1.47376	0.474261	1.43542	1.02005	0.597397	0.597096	1.17222	1.15291
2373	chr6:150856845-150862887	0.293132	0.436363	0.62673	0.662815	0.683475	0.571121	0.893129	0.938309	0	1.07693	1.13287	1.03991	0	0.789048	0.146669	0.816693	0	1.02478	1.19567	1.66138	0	0.98119	0.887761	0.568362	0	0.905504	0.556384	1.27703	0	1.28321	0.881406	1.05508	0	0.932056	0.595024	1.06383	1.43731	0.503529	1.28102	0.844285	1.01876	0.84562	1.25509	1.32543	0.819365	0.737058	0.895756	0.334859
5109	chrY:13339217-13346091	0	0	0	0	0	0	0	0	0	0	0	0	0	1.6761	1.61149	1.36393	0	0	0	0	0.200733	1.19416	2.34098	1.54037	0	2.45409	2.09594	2.57237	0	0	0	0	0	0	0	0	0	0	0	0	0	0	0	0	0	0	0	1.76601
2955	chr8:127431701-127440906	0.240522	0.381916	0.411398	0.100404	0.697895	0.958065	0.928257	0.615924	0	0.706917	0.418298	0.436874	0	0.647434	0.529519	0.375266	0	0.776178	0.60019	0.561806	0.549656	1.78359	0.896529	0.870529	0	0.39626	0.626094	0.454063	0	0.644129	0.482143	0.472211	0	0.50985	0.507762	0.376019	0.943476	0.283308	0.67271	0.800518	1.75145	1.19556	0.920789	1.04405	0.645417	0.430062	0.271381	2.5278
944	chr3:46417556-46423902	0.209319	0.138487	0.132603	0.0970875	0.361522	0.181255	0	0.329135	0	0	0.134827	0.118812	0	3.19284	1.95501	1.16636	0	0.375269	0.200895	0.0479336	0	0.215583	1.30037	0.225475	0	0.431067	1.05947	2.07711	0	0	0.0699324	0.0913224	0	0.0739511	0.0566525	0.0389568	3.19308	1.78067	3.47604	1.42906	3.14085	2.04376	0.702925	1.34607	0	0	0.262416	0.0531368
2577	chr7:99723172-99729894	0.592836	0.653711	0.625932	0.504117	0.887387	0.741512	0.735894	0.665845	0	1.29067	0.763717	0.710392	0	1.12296	0.856919	0.623975	0.0291409	1.1337	0.821857	0.950308	0.102635	0.542737	0.613822	0.383156	0.05596	0.949569	1.50033	0.813073	0	0.814177	1.12236	0.86215	0.100336	1.11704	0.802261	0.845896	0.861287	1.03451	0.863589	1.01185	1.13375	1.1109	0.53089	1.07223	0.662841	0.588896	0.557415	0.551815
3692	chr12:8787064-8796436	0.472473	0.797112	0.359171	0.55882	0.734422	0.695518	1.05567	1.0507	0	0.509169	0.456495	0.509545	0.112152	1.8653	1.41841	1.50064	0	0.101647	0.136038	0.162293	0.269931	0.924565	1.14472	0.732873	0.160554	1.7514	0.973654	2.81306	0.454398	1.65463	1.32595	1.70059	0.143936	0.450689	0.345264	0.870538	0.661905	0.602898	0.78461	0.574571	0.531712	0.461316	0.333194	0.93999	0.422612	0.0527999	0.399819	1.90705
4131	chr14:45019314-45022462	0.843789	0.418695	0.668171	0.293529	1.16587	0.608885	0.856967	1.04247	0	0.551107	0.271751	1.11754	0	1.00947	0.703651	0.391813	0	1.05893	0.539888	0.96613	0	1.01388	0.524195	0.545349	0	0.579227	1.06771	1.02111	0	1.44853	0.986671	0.828296	0	1.78864	0.570932	0.942239	0.394032	0.828242	0.860407	0.900111	1.02406	1.37311	0.850073	1.27176	0.471714	0.942953	1.58675	0.428402
4771	chr19:52984944-52989463	0.293926	0.0972323	0.0931005	0.545322	2.13213	2.03615	2.08962	1.58459	0	0.0959864	0.757296	0.667345	0	0	0.294132	0.272969	0	1.89703	2.16275	1.34617	0	0.100908	0.182598	0.189967	0	0.504421	1.16892	0.924802	0.0942272	0.100916	0.196399	0.128235	0.0994921	1.24611	0.875068	1.14877	0.640534	0.769361	0.770695	1.00335	0.843162	1.21751	0.690935	0.354406	1.64317	1.42337	1.10546	0.0746149
2674	chr7:150561605-150565847	0.313115	0.10358	0.396714	0.145231	0.432633	0.813406	0.954015	0.773685	0	0.71577	0.907578	0.414699	0.0275277	1.03014	1.77556	1.62842	0.277041	4.04176	1.90325	3.87194	0	0.214991	0	0	0.753679	3.22411	2.03765	3.41023	0	0.967542	1.35993	1.77589	0.582931	2.32305	1.10169	1.16549	0.77983	0.307346	0.364893	0.133606	0.552743	0.6485	0.105149	0.50339	1.05027	0.349913	0.294407	0.079486
1744	chr5:702471-709207	0.986007	0.913294	1.12434	0.914672	0.136237	0.113842	0.0667604	0.221487	0	0.321997	0.444576	0.55967	0.0173371	0.884707	0.789359	0.842448	0.0290804	1.41418	1.32486	1.08381	0.102422	1.21862	0.490037	0.637266	0	0.541483	0.570365	0.525013	0.0316095	2.16663	0.988262	1.50563	0.0333757	0.905712	0.587102	0.367017	0.368356	0.0645227	0.172359	0.29451	0.478666	0.75851	0.59601	0.435927	0.440976	0.808049	0.370838	0.951154
2828	chr8:53731264-53737231	0.445223	0.515488	0.282047	0.413012	0.845857	0.514043	1.2058	0.250026	0.0427343	0.29079	0.860333	0.589667	0	0.399482	0.668303	0.496174	0	0.558741	0.783393	0.611731	0	0.687822	1.10636	0.287752	0	0.458442	1.20724	0.377149	0.0713651	0.764314	0.520615	0.728414	0	0.471884	1.56651	0.621462	1.24746	1.16539	1.16741	1.47232	1.12981	1.18557	0.897077	1.1184	0.497797	0.829245	0.348851	0.508601
3222	chr10:35403060-35410120	1.25435	1.1826	0.715164	1.43996	0.64993	0.434472	1.14655	0.760766	0.0180597	0.675888	0.727159	0.49839	0.0165415	1.2943	0.753138	0.419369	0.194222	0.60718	0.541742	0.430866	0.228019	0.581351	0.175332	0.56749	0.0532812	0.968694	0.476169	0.637537	0.301591	0.323001	0.502888	0.61566	0.509508	0.265893	0.814782	0.630316	0.585756	0.184686	0.767433	0.963416	0.415183	0.835045	0.315923	1.13434	0.631112	1.26159	1.65117	0.334346
2916	chr8:102979373-102991718	0.538047	0.605162	1.26115	0.399297	0.557568	0.496972	0.58288	0.676825	0.0206576	0.562266	0.658479	0.651525	5.59118	0.740247	0.646109	0.559646	0.0158687	0.887447	0.929509	0.591416	0	0.44332	1.1699	0.278196	0.0457094	0.332413	0.350143	0.703204	0	0.221679	0.719036	0.234741	0.0546377	0.798374	1.31061	0.680934	0.435512	0.915432	0.376213	0.390294	0.783599	0.700456	0.325232	0.627133	0.962532	0.60128	0.640806	0.409759
5918	chr1:70366862-70372373	1.04445	0.797333	0.916141	0.614873	0.416288	1.11314	1.38716	1.24527	0.161944	0.236135	0.776256	0.638449	0.211901	0.504619	0.723591	0.58199	0.355432	0.432118	0.925312	0.441559	0.459011	0.992966	0.598944	0.571189	0.341272	0.744552	0.435703	0.700029	0.231807	0.579281	0.724737	0.262892	0.734278	1.27731	0.782816	0.717733	0.67533	0.236587	0.9831	0.411386	0.797789	1.35497	0.404705	0.435934	0.898299	0.628493	0.604338	0.489491
3123	chr9:100139459-100146544	0.624963	0.80629	1.00957	0.565255	1.10098	0.703526	0.888613	0.505388	0	0.673503	0.42268	0.922316	0.0659327	0.728982	0.813021	0.452714	0.470018	1.41175	0.659793	0.815757	0.0649184	0.708034	0.582377	0.444311	0.0530933	0.900925	1.35568	0.544533	0.210369	0.708096	0.626392	1.26787	0.285587	0.52991	0.558186	0.662987	0.350213	0.981517	0.928595	0.56001	0.827437	0.887572	0.75554	0.828914	0.279505	0.628569	0.470098	0.380761
4363	chr16:30859669-30865380	0.542707	0.692474	0.810392	0.647284	0.803424	1.54411	1.25985	0.73145	0.0446496	0.911468	0.973799	0.880135	0.0204482	0.834772	1.16376	0.302407	0.171494	1.33436	1.04173	0.266312	0.322137	0.798499	0.722466	0.450973	0.0329323	0.478988	0.672715	0.337759	0.298254	0.718712	0.932481	0.507373	0.15746	0.575206	0.692456	0.216438	0.651684	0.68491	0.745389	0.396982	0.256618	0.688171	0.546748	0.327188	0.346738	0.953051	0.291589	0.531396
6251	chr1:247286262-247291931	0.468623	0.54258	0.890612	0.652079	0.485625	0.473427	0.555265	0.526334	0	0.994738	0.528238	0.398995	0	0.700796	0.859744	0.652815	0	0.504091	0.524724	0.482912	0.121696	0.563089	0.582254	0.70671	0	0.643381	0.592986	0.623812	0.0375579	0.724036	0.782824	0.357792	0	1.7384	1.01467	0.872166	0.51062	0.306659	0.409588	0.399923	0.517039	0.554615	0.786854	0.753398	0.960594	0.698262	0.660935	0.475851
6084	chr1:161404178-161410693	0.815559	0.741926	0.581235	0.520132	0.77472	0.470811	0.690247	0.503798	0.0195702	0.865587	0.722314	0.810114	0	0.609809	1.63226	0.492316	0	0.877286	0.913194	0.560284	0.176493	0.489981	0.443325	0.65888	0	0.769792	1.17942	0.641514	0.0653632	0.840041	0.544949	0.756108	0	0.648298	0.551831	0.341518	1.20602	0.6004	0.950425	0.347999	0.764846	0.663585	0.753163	0.737529	0.455932	0.987356	1.02244	0.879897
2436	chr7:21500901-21508350	0.237771	0.471936	0.225941	0.537637	0.677594	0.411786	0.965938	0.480695	0	0.873541	0.804056	0.607329	0	0.586694	0.832782	0.364349	0	0.831243	0.741657	0.530879	0	0.67344	1.27402	0.806787	0	0.612076	1.54734	0.820052	0	0.85718	1.31073	0.622414	0	0.693026	0.820503	0.696972	0.832756	0.816866	0.46759	0.380463	0.432855	0.896969	0.598854	0.501718	0.398772	0.531429	0.558911	0.860124
513	chr2:38080800-38086512	0.620128	0.923137	0.515613	0.161793	0.401642	1.47671	0.314906	0.679085	0.0446418	0.911308	0.524262	0.439991	0.0204446	1.18239	0.853273	0.777481	0	0.833829	0.743964	0.639036	0	0.878195	1.01127	0.551092	0	1.3569	0.756672	0.956816	0	0.638743	0.155386	0.405828	0.118074	0.575105	0.566455	0.692481	0.21719	1.14132	0.203252	0.496141	1.02629	0.550441	0.624746	0.514063	0.866694	1.03951	0.874614	0.767438
2721	chr8:8171833-8181319	0.186718	0.324278	0.532283	0.194861	0.967462	0.889266	0.66372	0.975164	0	0.594515	0.225505	0.476926	0	0.586373	0.747396	0.468193	0	0.351488	0.627213	0.737577	0.193955	1.49037	1.52246	1.26712	0.277594	1.3939	0.60755	1.0507	0.0448937	0.288485	0.655008	0.641514	0.0711033	0.791597	0.90964	0.573385	0.13079	0.274917	0.203995	0.268895	1.08155	0.787244	1.22271	1.29454	0.469725	0.365158	0.351124	0.319947
1168	chr3:149752188-149761298	0.631877	0.434136	0.55425	0.57489	0.85628	0.294625	0.839206	0.655102	0.0139962	1	0.375697	0.551787	0.0128197	0.523347	0.77824	1.0292	0.0645092	0.575132	0.839697	0.534272	0.10098	0.500606	0.815289	0.62829	0.0206464	0.650637	0.421748	0.282337	0.0701197	1.1515	1.02306	0.190854	0.32083	0.875782	0.591988	0.976987	1.0895	0.667945	0.679724	0.808865	0.740062	0.733445	1.12626	0.64468	0.652147	0.760455	0.594123	0.629284
546	chr2:58113432-58119130	0.388532	0.385585	1.32912	0.216254	0.402628	0.538306	0.63136	0.314194	0.0223757	0.532902	0.750785	0.6175	0	0.69723	0.93313	0.519594	0.171885	0.417939	0.671212	0.693989	0.040359	0.960384	0.868936	0.703113	0	0.800134	0.758531	0.620637	0.0373668	0.240117	0.38942	0.610237	0.276183	0.658877	0.378565	0.694182	0.725745	1.60177	1.35834	0.696303	0.565849	0.965637	0.78285	1.03065	0.608176	0.868386	1.02289	0.946859
2095	chr6:24667711-24680423	0.557349	0.829683	0.628921	0.436241	0.39708	0.663609	0.778324	0.539914	0	0.682543	1.00969	0.5734	0.00918743	0.468833	0.627457	0.698773	0.0462317	0.786887	1.237	0.813653	0.0361844	0.57403	0.97382	0.630385	0.0443899	0.466291	0.793416	0.379391	0.100505	0.46644	0.663365	0.615505	0.0707472	1.03377	0.933369	0.641827	0.585608	0.854812	1.1265	0.735758	0.737918	0.618396	0.772062	0.945044	0.623163	0.311425	0.622307	0.82239
5952	chr1:86339777-86344673	0.723461	1.07696	1.289	0.943763	1.03085	0.861391	0.826605	0.7313	0	0.885968	0.873744	0.461977	0	0.405709	0.633472	0.403127	0	0.972772	0.954726	0.55914	0	0.279417	0.505623	0.350685	0.0384132	0.931175	0.784674	0.787943	0	1.02462	1.08767	0.532633	0.137749	0.287544	0.660845	0.25246	1.2669	1.24273	0.948484	0.520932	0.359193	1.6054	1.00217	0.327121	0.202223	0.505303	0.340118	0.688706
4760	chr19:52300607-52307977	0.360479	0.596242	1.08472	0.292599	0.933894	0.520249	0.854255	0.364385	0	0.941763	0.580481	0.443327	0	1.13206	0.541098	0.535643	0	0.517017	0.57662	1.03186	0	0.495024	0.559859	0.543623	0	0.433045	0.19549	0.654348	0	0.928251	0.301086	1.61203	0	0.636776	0.536604	0.805076	0.561121	0.884593	0.945202	1.11517	0.954533	0.426627	0.907909	1.01419	0.268697	0.469984	0.225961	1.09812
765	chr2:186431386-186438154	0.457961	0.324634	0.559511	0.409657	0.745763	1.07638	0.398669	0.617232	0	0.897329	0.442474	0.779835	0	0.293508	0.523751	0.619735	0	0.844496	0.313951	0.584288	0.0339793	0.673811	0.48772	0.338268	0	0.404193	0.283834	0.712542	0	0.539096	0.655726	0.556589	0	0.346704	0.849929	0.474866	1.22205	1.15592	1.5439	1.84246	1.21266	0.871067	0.659103	1.26216	0.585188	0.584894	0.492113	0.996482
4215	chr14:92622417-92629608	0.431026	0.733298	0.702137	0.428403	0.446664	0.799797	1.1882	0.622424	0.0354614	0.784227	0.713914	0.524263	0.129922	0.883986	1.97179	0.514663	0.0544812	0.861063	0.709166	0.634527	0.159904	0.380508	0.573794	0.875526	0.104621	0.634033	0.667851	0.581216	0	0.317118	0.370296	0.322371	0.0312642	0.391575	0.699948	0.584456	0.690104	0.604407	0.699636	0.472934	0.366859	0.819835	0.806438	1.07655	0.895001	0.82574	0.75265	1.26613
4890	chr21:32660559-32664759	0.21083	0.418462	0.70119	0.440048	0.436959	0.730256	0.321184	0.284153	0	1.13603	0.509251	0.35901	0.0556057	0.56751	0.949401	0.646133	0	0.566968	0.809382	0.651775	0	0.75999	0.785855	0.817569	0	0.542724	0.914675	0.841945	0	0.651477	0.105656	0.827836	0	1.11728	0.427962	0.294286	0.787626	1.03473	1.84271	0.472296	0.76762	0.654983	1.1682	0.762634	0.235726	0.471215	0.495583	0.883088
3199	chr10:17010207-17018765	0.413926	0.410786	0.491663	0.539971	1.28683	0.492842	0.998427	1.01116	0	0.506903	0.5499	0.205581	0.122818	0.603525	0.258885	0.31714	0.0686696	0.612225	0.546243	0.63982	0.241857	0.373025	0.57858	0.401286	0	0.372938	0.448948	0.751365	0.298568	0.266469	0.414872	0.507907	0.367792	0.712908	0.924245	0.606664	0.386589	0.863386	0.85923	0.529866	0.890546	0.413337	0.886142	0.623871	0.983458	0.636035	0.875687	0.630465
3743	chr12:29135982-29140551	0.193807	0.961685	0.0920819	0.404517	0.803354	0.587381	0.295251	0.457116	0	0.664554	0.280879	0.440029	0	1.04337	0.678799	0.485968	0	0.729664	0.186007	0.266288	0	1.79646	1.0836	0.313148	0	0.399122	1.05103	0.773963	0.0465981	0.199625	0.485625	0.317081	0.0492018	0.410825	0.393406	0.378734	0.362015	0.665826	0.42348	0.682253	0.513192	1.20419	0.781	1.05158	1.08346	1.51608	0.820022	0.51659
2337	chr6:131338777-131348185	0.423598	0.513805	0.357797	0.556682	0.975482	1.01891	0.621421	0.317177	0	1.01444	0.818546	0.561027	0	0.633465	0.612293	0.57698	0	1.01258	1.26483	0.776025	0	0.387801	0.263156	0.152098	0.0999625	1.50238	0.918879	0.580964	0.113165	0.387835	0.518915	0.893244	0.119488	0.59862	0.726102	0.315348	0.659372	0.69299	0.822745	0.662748	0.87241	1.2951	0.711255	1.10665	0.36837	0.525979	0.30978	0.465976
1481	chr4:82473317-82483151	0.585362	0.759667	0.513449	0.53257	0.419953	0.350918	0.503042	0.303438	0	0.70582	0.478556	0.664518	0	0.727232	1.12648	0.62726	0.0398402	0.629666	0.518589	0.742412	0.0233865	0.556505	0.461555	0.494733	0.0573796	0.7882	0.927916	0.653882	0.0216526	1.06673	0.947746	0.942956	0.114312	0.763588	1.0237	0.779363	0.462595	0.839766	1.0626	0.691681	0.625966	0.639485	0.635084	0.787248	0.654484	0.704474	0.592724	0.960169
2377	chr6:152490629-152497176	0.338156	0.201355	0.899725	0.0470536	0.420509	0.585638	0.549499	0.45576	0.194745	1.25891	0.65344	0.537436	0.0178375	0.606829	0.676785	0.150742	0.209438	0.436499	0.973641	0.41816	0.140505	0.696552	0.252091	0.65566	0.0287278	1.04459	0.660181	0.491061	0.130088	0.766275	0.745643	1.37205	0.206034	0.501768	0.329481	0.528654	0.82114	0.929391	1.53689	0.735884	0.223855	0.240124	0.817617	0.815472	0.529321	0.831372	0.254361	0.978608
1549	chr4:106110154-106115653	0.161036	0.639258	0.229535	0.224078	0.917831	0.97612	1.14486	0.596863	0	1.02548	0.388975	0.274218	0	0.144491	0.564021	0.538394	0	0.866121	0.386388	0.663784	0	0.663422	0.450188	0.260198	0	0.414542	1.1353	0.58463	0	0.99522	0.242106	0.685009	0	0.341358	0.8499	0.269737	0.526403	1.18552	0.774121	0.824568	1.38585	1.00058	1.05453	0.728142	0.360103	0.179961	0.681364	0.490559
5972	chr1:94445506-94448856	1.05723	0.918063	0.879051	0.643614	0.821693	0.114436	0.939527	0.178115	0	0.388414	0.25537	0.450075	0	0.592885	0.264494	0.589111	0	0.142156	0.761014	0.544735	0	0.136109	0.123149	0.6833	0	0.272156	0.573344	0.479777	0.127098	0.408364	0.794738	0.864851	0	0.140068	0.751123	0.368933	0.246853	0.778316	0.693036	0.422926	1.66221	0.586517	2.13021	0.876407	0.591038	0.443056	0.248516	0.503222
3600	chr11:94650031-94657830	1.47616	0.845173	1.07901	1.58004	0.588353	0.737453	0.461297	0.535646	0	0.834344	0.493699	0.676756	0	0.560368	0.284076	0.379637	0	0.977162	0.762868	0.741084	0.14744	1.16949	1.16395	1.06414	0	0.292306	0.554214	0.577135	0.191112	0.409359	0.398337	0.334398	0.0288272	0.481403	0.322694	0.602298	0.318155	0.278647	0.347362	0.39973	0.338263	0.151186	0.285991	0.0342289	0.634798	0.634479	0.907514	0.51886
836	chr2:231091066-231101400	0.171398	0.297671	0.77363	0.208684	0.355232	0.445255	0.435186	0.317634	0	0.251877	0.621005	0.340506	0	0.461366	1.02911	0.429777	0	0.460925	0.452375	0.529871	0.0445101	0.882636	0.399296	0.443104	0	0.970675	0.557699	0.622248	0.0206051	0.573764	0.472421	0.813211	0.0217564	0.454154	0.487085	0.598111	0.840411	1.6824	1.3108	1.09703	1.21973	0.988889	1.07921	1.54999	0.239546	0.287311	0.282024	0.652655
4821	chr20:18518036-18522594	0.194274	0.385602	0.369216	0.270329	0.503307	0	0.295963	0.392759	0	1.23715	0.750818	0.220545	0.256196	1.65599	0.291616	0.703648	0	0.313468	0.652596	0.333663	0.100902	1.30058	0.724145	0.376684	0	1.20025	0	0.49371	0.0934211	2.00106	0.0973593	1.71637	0	0.926587	0.236613	0.759295	0.453611	1.33486	1.3584	1.18128	0.578734	0.775993	0.489303	0.644185	0.217215	0.108553	0.365334	0.961696
4443	chr17:35296918-35316213	0.940961	1.00215	0.676059	0.558859	0.80862	0.814807	0.675953	0.572241	0.112346	0.652047	0.620876	0.468968	0.133167	0.617773	0.482294	0.53711	0.345206	0.987492	0.903093	0.520301	0.393356	0.425469	0.491888	0.44499	0.21447	0.236317	0.846333	0.533245	0.761494	0.661898	0.989119	0.150193	0.396195	0.754063	0.372692	0.6407	0.600169	0.337911	0.641891	0.293786	0.501364	0.631508	0.323697	0.304399	0.487547	0.564244	0.66895	0.506868
4165	chr14:59610765-59618496	0.630023	0.227362	0.598675	0.47818	0.356117	0.24798	0.756201	0.231582	0	0.392785	0.719392	0.650198	0	0.719467	0.458519	0.957439	0	0.431268	0.604668	0.826296	0.0594946	0.825845	1.28093	0.592276	0	0.825653	0.993934	0.623797	0	0.530947	0.344434	0.299857	0	1.03198	0.930091	0.863424	0.855876	0.449756	0.400476	0.256611	0.64456	0.762578	0.577013	1.00137	0.640381	0.576053	0.80779	0.828754
5861	chr1:37907865-37914094	0.995165	0.564353	1.14829	0.494554	1.03127	0.184659	1.15509	0.62273	0.0204686	0.905323	0.961511	0.484173	0.018748	1.53073	1.067	0.554526	0.0314469	0.535243	0.477558	0.341836	0.0369191	0.805317	0.529916	0.597243	0	0.951518	0.462586	0.619351	0.0341819	0.366085	0.427475	0.651262	0.180459	0.45204	0.346298	0.396885	0.331944	0.627962	0.80767	0.545962	0.752901	1.00952	0.214838	0.428548	0.635817	1.19156	0.534689	0.595482
4023	chr13:86757453-86765921	0.627486	1.45303	1.29191	0.472948	0.379314	0.679199	0.212429	0.387619	0	0.665977	0.555744	0.474893	0.0137915	0.234592	0.209309	0.174824	0	1.23746	0.853165	0.467003	0.162952	0.430844	0.341092	0.270367	0	0.161529	0.11343	0.15187	0	0.700183	0.524101	0.342203	0	0.387953	0.127373	0.204371	1.22093	1.64247	1.18828	0.736308	0.969242	1.48526	1.15896	0.567451	0.643118	1.57777	1.03249	0.477874
4736	chr19:43321084-43329393	0.373037	0.899077	0.455755	0.55615	0.994041	1.33824	0.703604	0.933721	0	0.365465	0.308933	0.211741	0	0.0956321	0.0533284	0	0.259333	2.17833	1.02293	0.878655	0.221426	2.30521	1.53945	0.929948	0.045273	1.09746	0.462401	0.541715	0.256262	1.31738	1.12167	0.732376	0.162348	0.50834	0.519239	0.595088	0.0497716	0.104618	0.186311	0.170545	0.0705562	0.37842	0.214752	0.192769	0.238336	0.29777	0.50107	0.162339
1379	chr4:39539259-39544115	0.547064	0.995345	1.03969	0.697793	0.850369	0.394766	1.38902	1.04454	0	0.267979	0.616658	0.362274	0	0.40905	0.547448	0.558864	0	0.686548	0.787572	0.75166	0.0473556	0.0939062	1.10454	0.412502	0.0387295	0.469422	0.395568	0.72823	0	0.187829	0.639701	0.238675	0.324061	0.483187	1.33258	0.509078	0.596091	0.35799	0.796912	0.233432	0.422509	0.890244	0.642995	0.494723	0.815552	0.815142	0.685837	0.694378
925	chr3:38422225-38425408	0.278171	0.690154	0.528661	0.483837	0.288264	0.361315	0.847547	0.374914	0	0.408786	0.134382	0.315787	0.0366834	0.748778	0.695916	0.310005	0	0.448838	0.266976	0.477755	0	0.143248	0.648041	0.539354	0	0.716075	0.603415	0.302965	0	1.00283	1.39404	0.273064	0	0.442243	1.01638	0.465941	0.779401	0.546092	1.09408	0.712174	0.27622	0.617279	0.840728	0.503113	0.933057	0.310863	0.915428	0.317769
1102	chr3:125890500-125899275	0.403691	0.651022	0.479506	0.456403	0.418337	0.961311	0.819991	0.850135	0	0.593243	0.390039	0.57285	0	0.543325	0.555464	0.590479	0	0.868489	1.16233	0.866666	0	0.467744	0.705342	0.293523	0	0.675474	0.383117	0.659508	0.0242654	0.311857	0.404614	0.891626	0.0512425	0.641797	0.614585	0.957932	0.471288	0.346721	0.573357	0.775146	1.13576	0.761442	0.610045	0.760556	0.733461	0.563917	0.948927	0.807024
1412	chr4:55938235-55948225	0.443247	0.747806	0.505432	0.462577	0.964591	0.882789	0.630238	0.716881	0.0382902	0.303975	0.856516	0.402549	0.0350715	0.596564	0.53227	0.592767	0.372573	1.14431	0.978442	0.517664	0.0920853	0.502165	0.330435	0.429713	0.188279	0.456407	0.480751	0.579305	0.170516	0.913107	0.710818	0.232058	0.270066	0.563749	0.791774	0.618705	0.827949	0.565605	1.046	0.595771	1.05633	1.18031	1.07172	0.881846	0.792941	0.396271	0.45844	0.438832
1439	chr4:67450493-67463204	0.557393	0.622311	1.12553	0.5817	0.505414	1.41782	0.566098	0.539956	0.0100314	0.784987	0.774156	0.652541	0	0.93774	0.383476	0.232943	0	0.749475	0.702136	0.598321	0.0904681	0.502315	0.519411	0.540373	0.0147978	0.717427	0.528985	0.531189	0	0.610008	0.628501	0.569957	0	0.664618	0.905156	0.447369	0.618191	0.547123	0.639417	0.490544	0.276741	0.8349	0.350965	0.378048	0.584262	0.700761	0.327556	0.583677
6215	chr1:228947563-228951891	1.12528	1.11675	0.777665	0.925247	0.10601	0.177166	0.207792	0.0689378	0	0.501107	0.889548	0.464526	0.134904	1.00967	1.74029	0.45602	0	0.220081	0.294544	0.562226	0.0531315	0.632159	0.571964	0.396698	0	1.05335	0.554769	0.817051	0	0.632214	0.102532	0.133893	0.259705	1.19266	0.498369	0.74252	0.668795	0.401653	0.447055	0.196428	0.541762	0.454012	0.41224	0.246695	0.114378	0.571602	0.673302	0.077907
4378	chr16:35797699-35804523	0.583976	0.515153	0.986524	0.22572	1.14309	0.505682	0.988495	0.131179	0.0747365	0.508552	0.0626919	0.0736606	0.0855677	0.75686	1.68823	0.144624	0.487992	0.907364	1.37005	0.0445765	0.606609	0.534626	0.241859	0.0419366	0.220495	0.801752	0.0703764	0	0.280818	0.467838	1.43076	0.0424632	0.42829	0.962806	0.105369	0.289828	0.848415	1.14643	1.07753	0.124591	0.257724	0.518352	0.326847	0.31295	0.652935	0.942654	1.52523	0.0494153
857	chr3:5140823-5149818	0.246136	0.293124	1.02911	0.479491	0.15304	0.298392	0.399969	0.331738	0	0.626963	0.237813	0.475015	0.0129835	1.01591	0.689665	0.466317	0.0217779	0.264766	0.377969	0.473464	0.0255676	0.659108	0.504602	0.381793	0	0.760332	0.533925	0.571893	0.047344	0.861986	0.197359	0.644312	0.0249947	0.782627	0.359733	0.494738	0.36781	1.25633	1.29077	0.59865	0.879874	0.524344	0.991877	1.0981	0.275201	0.440101	0.324002	0.749798
6073	chr1:155691829-155699522	0.460461	0.399848	0.546938	0.520587	0.536813	0.199364	0.17537	0.814539	0	0.338335	0.667334	0.522728	0	0.413155	0.691176	0.513156	0.254633	0.371484	0.662896	0.632668	0.0298942	0.474242	0.321814	0.558001	0.122244	0.770465	0.436994	0.376127	0.0276779	0.592855	0.403825	1.09235	0.0292244	0.488035	0.280405	0.482049	0.430052	0.79096	0.653988	0.884154	0.419128	0.357627	0.289931	0.69401	0.579189	0.450254	0.378831	0.657511
3052	chr9:35019246-35025461	0.284973	0.353515	0.880081	0.793069	0.369141	0.616917	0.868272	0.624133	0	0.418782	0.275336	0.444825	0	0.703164	0.285173	0.516076	0	0.613084	0.478634	0.538381	0.0370023	0.807131	0.132777	0.736724	0.121049	0.953661	0.772713	0.879391	0	0.73382	0.714062	0.93247	0	0.679586	0.231386	0.716001	0.532306	0.629376	0.871758	0.63839	0.61311	0.505899	0.717739	0.64427	0.557593	1.27386	0.40192	0.271283
1111	chr3:128854508-128860206	0.233119	0.154234	0.59072	0.594697	0.644205	0.740171	0.55244	0.576022	0	0.304516	0.375393	0.573393	0	0.348615	0.466565	0.519594	0	0.417939	0.372896	0.533838	0.040359	0.80032	0.434468	0.552446	0.0330074	0.480081	0.168562	0.451373	0.149467	0.480234	0.934609	0.610237	0	0.164719	0.31547	0.60741	0.870894	0.533923	0.815007	0.646567	0.925934	0.551793	0.78285	0.890108	0.868823	0.868386	0.292254	0.650965
4593	chr19:5158650-5165741	0.37466	0.0619698	0.890047	0.217222	0.129418	0.162215	0.507349	0.16832	0	0.42823	0.72398	0.389881	0.131754	0.952478	1.24974	0.835072	0	0.537356	0.419513	1.02956	0	0.321561	0.581884	0.565009	0	0.450081	0.609541	0.272036	0	0.514543	0.125172	1.06248	0	0.595644	0.40561	0.69729	0.466556	0.980686	1.30985	0.679437	1.32278	0.44341	0.629084	1.24232	0.139634	0.139564	0.293562	0.760878
3716	chr12:14232268-14235122	0.620453	0.923622	0	0.431674	0.642964	0.805904	0.78768	0.418118	0	0.911787	0.449603	0.528266	0.0409106	0.417532	0.310444	0.432161	0	0.834267	0.297742	0.319686	0.161125	0.159756	1.01181	0.501256	0	0.479156	0.672951	1.01363	0	0.479309	1.39921	0.507551	0	0.164402	0.50378	0.60624	0.579478	0.152255	0.813437	0.0992802	0.205367	0.826095	0.312537	0.0935151	0.17343	0.866713	0.437537	0.826905
5352	chrX:44999286-45006625	0.784337	0.479008	0.68798	0.545694	0.625226	0.626936	1.22552	1.09777	0	0.591088	0.816105	0.582184	0.0159128	0.595486	0.422631	0.268952	0.0266913	0.5192	0.173717	0.290142	0	0.434975	0.506001	0.350948	0	0.186375	0.523508	0.262845	0.0870382	0.248579	0.846602	1.06606	0.0919015	0.127893	0.783811	0.538984	0.507142	1.18444	0.580063	0.733713	0.599103	0.481982	0.729395	0.872977	0.607123	0.471969	0.510559	0.275689
3651	chr11:117810820-117812651	0.725189	0.479793	0.229702	0.168181	0.7515	0.837283	0.736515	0.325799	0	0.710467	1.16777	0.823253	0	0.650685	0.725697	0.538786	0	0.780076	0.928006	0.664267	0	0.248964	1.5768	0.468697	0	0.746719	1.04873	0.702067	0	0.746958	0.484565	0.158194	0	0.256205	0.392547	0.539867	0.225765	0.711827	0.422555	0	0.160022	0.214565	0.487059	0.437203	0.810823	1.08055	0.227287	0.184094
2466	chr7:39753489-39764403	0.284007	0.161059	0.231323	0.282279	0.672712	0.175665	0.453268	0.464804	0	0.35774	0.509605	0.713914	0	0.473254	0.568413	0.81388	0	0.26186	0.389397	0.557461	0.16858	0.334294	1.05862	0.734227	0	0.543102	0.220027	0.854315	0.0195102	0.417904	0.487983	0.955861	0.0412006	0.21501	0.494146	0.86082	0.416823	0.438074	0.460997	0.64921	0.725181	0.57621	0.286122	0.660431	0.589725	0.317385	0.381483	0.896062
3074	chr9:76488302-76495692	0.539255	0.594629	0.28468	0.500242	0.869276	0.62261	0.608531	1.0902	0	0.293505	0.926256	0.476138	0	0.376331	0.479674	0.434032	0	0.451166	0.632566	0.246977	0	0.246842	1.00502	0.348526	0	0.246785	1.03979	0.783093	0	0.123432	0.660597	0.117634	0	0.317527	0.778402	0.535265	0.727483	0.235253	0.366584	0.19175	0.991615	1.27642	0.724362	0.505723	1.00489	0.870466	0.788722	0.136893
4777	chr19:53469501-53482212	0.661904	0.553165	0.562763	0.557463	0.469313	0.241332	0.530717	0.25824	0.0100314	0.477818	0.63952	0.533897	0.00918816	0.46887	0.348615	0.213531	0	0.374738	0.501526	0.478657	0	0.538195	0.486948	0.405279	0.0591911	0.681556	0.604555	0.733547	0.117265	0.538242	0.698334	0.52436	0.0707528	0.738464	0.763725	0.564074	0.683263	0.376147	0.334933	0.468246	0.7841	0.247378	0.280772	0.525066	0.272655	0.31145	0.163778	0.583677
1756	chr5:10716140-10724937	0.503351	0.649394	0.621799	0.245141	0.573775	0.784561	1.12467	0.576647	0	0.29588	0.437696	0.31428	0	0.135492	0.402963	0.168286	0	0.758028	0.772951	0.484119	0.026143	0.518416	0.515958	0.325321	0	0.570125	0.709723	0.511668	0.0242048	0.103692	0.252251	0.362347	0	0.586843	0.817398	0.674496	0.564131	0.691708	0.615918	0.161085	0.666426	0.625502	0.96349	0.728308	0.675348	0.506256	0.61526	0.42167
555	chr2:63988512-63996440	0.335111	0.277141	0.212291	0.349724	0.289391	0.532001	0.453792	0.37638	0.0964958	0.656615	0.161889	0.380426	0	0.451023	0.167673	0.342339	0	0.240316	0.536041	0.537177	0.0290082	0.69028	0.208184	0.397073	0	0.63261	0.181732	0.527192	0	0.747869	0.0559795	0.87722	0.141791	0.236785	0.0906983	0.311841	0.521632	1.04163	0.146447	0.571966	0.332759	0.297452	0.844015	0.303048	0.374682	0.436909	0.367603	0.552954
2692	chr8:6924881-6936329	0.0386801	0.0767735	0	0.0538226	0.0801669	0.0334943	0	0.0781985	0	0.15158	0.037372	0.0439107	0.193833	2.74179	1.81924	1.44407	0	0	0.0371235	0	0.100448	0.119513	0.865066	0.124997	0.0164302	0.716913	0.58734	0.533617	0	0.0398412	0.0387686	0	0.0589184	0.0819928	0	0.0431931	2.49267	1.5187	1.92702	1.18835	0.79378	1.57934	1.01317	0.53635	0.0432476	0.0432259	0.145476	0.206203
3577	chr11:86834121-86837479	0.263679	0.785037	0.501118	0.458629	0.273245	0.228327	0.401695	0.710763	0	0.258326	0.509524	0.374169	0	0.354884	0.395796	0.22039	0.0583252	1.13454	0	0.815156	0.205424	0.27157	0.491423	0.596464	0	0	0.714973	0.382907	0	0.407391	0.396423	1.12163	0	0.97814	0.535239	0.883331	0.49253	0.12941	0.345693	0.253151	0.174553	0.351072	0	0.238451	0	0.589334	0.495849	1.50607
6061	chr1:150650452-150657785	0.543447	0.35955	0.286893	0.50413	0.50059	1.04575	0.551934	0.569681	0.0521622	0.354943	0.350046	0.479838	0.0955548	0.704332	0.241701	0.370112	0.373984	1.1042	0.753388	0.373345	0.0627232	0.248761	0.618952	0.390261	0.0256489	0.310879	0.32746	0.526119	0.116146	0.497565	0.60521	0.118549	0.0306589	0.383993	0.931537	0.235999	0.169185	0.414893	0.263881	0.0772962	0.479674	0.589571	0.669159	0.400442	0.540106	1.21463	0.681302	0.367886
4361	chr16:30541069-30546762	0.388873	1.0034	0.443429	0.432887	0.564175	1.21225	0.947872	0.262058	0	0.304783	0.976878	1.0595	0	1.74461	0.389146	0.216688	0	0.920272	0.522512	0.213723	0	0.400511	0.43485	0.351865	0	0.320335	0.0843552	0.169413	0.0373996	0.240328	0.701572	0.356284	0.197447	0.329728	0.378897	0.260547	0.290553	0.152683	0.611792	0.298678	0.514859	0.621312	0.313415	0.797112	0.521752	0.782234	0.877532	0.177692
2440	chr7:22913414-22917709	0.618504	0.818417	0.587729	0.286878	0.320472	0.0892635	0.628163	0.0694673	0	1.31289	1.09558	0.468094	0	0.27748	0.309469	0.516963	0	0.776202	0.890419	0.778998	0	0.212338	0.384239	0.399745	0.0437871	0.424578	1.11806	0.523935	0	1.06178	0.413279	0.539686	0.10468	0.874055	0.334798	0.460445	0.192552	0.809477	0.900979	0.395873	0.409443	0.2745	0.62311	0.621475	0.461026	0.80639	0.387699	0.314022
4249	chr15:34154889-34161933	0.12572	0	0.358394	0.131203	0.325703	0.326594	0.766101	0.254165	0	0.431087	0.364405	0.463842	0	0.507617	0.691945	0.420322	0	0.270471	0.542972	0.345475	0.0326481	0.647413	0.35146	0.325016	0	0.453084	0.340893	0.50206	0	0.323735	0.378022	0.493646	0.0638331	0.532994	0.306237	0.596651	0.645795	0.925527	1.26365	0.844904	0.95709	0.557961	0.569953	1.3264	0.281131	0.210742	0.354625	0.813827
1109	chr3:128836995-128842027	0.527934	0.349287	0.418055	0.612174	0.364725	0.609538	0.714906	0.35577	0	0.862028	0.340054	0.499437	0	0.710543	0.176101	0.343204	0	0.189297	0.168896	0.785823	0.0456996	0.181245	0.24598	0.454945	0.0373752	0.543608	0.477169	0.447214	0	0.634412	0.440951	0.74857	0.0446756	0.652806	0.285773	0.589531	0.328712	0.431839	0.769045	0.619491	0.52423	0.62481	0.531865	1.11399	0.590275	0.196659	0.992781	0.871125
4220	chr14:98985269-98992897	0.638529	0.460862	0.496438	0.323091	0.180462	0.653452	0.825365	0.273826	0	0.739306	1.17778	0.329488	0.01531	0.781265	1.16178	0.129382	0	0.561974	0.445696	0.398787	0.0904467	0.298927	0.270463	0.150068	0	0.597715	0.944394	0.295036	0	0.597906	0.407265	0.227929	0.117893	0.430669	0.329927	0.388925	0.379501	0.740721	0.253677	0.371536	0.422699	1.18507	0.116961	0.384958	0.324513	0.45409	0.218319	0.17683
2651	chr7:140655492-140669521	0.473466	0.5012	0.509896	0.549015	0.556063	0.601316	0.512918	0.510503	0	0.773091	0.365964	0.429993	0	0.623074	0.663317	0.527649	0	0.780928	0.575588	1.08423	0.0163939	0.422618	0.264722	0.244805	0	0.42252	0.171176	0.45837	0.0151784	0.455167	0.569458	0.413131	0.0320531	0.568728	0.563835	0.458214	0.589597	0.340811	0.496585	0.383853	0.417906	0.336208	0.381594	0.399622	0.4235	0.423287	0.445177	0.45673
3166	chr9:131546099-131553142	0.251476	0.374353	0.597408	0.218702	0.456049	0.38108	0.255403	0.338934	0.235342	0.677519	0.607428	0.74939	0.0829073	0.846149	0.817869	0.630572	0.111252	0.676273	0.48271	0.475096	0.130611	0.518004	0.585849	0.487594	0	0.582619	0.477318	0.684724	0.0604638	0.453293	0.567114	0.452574	0.383053	0.53307	0.816748	0.561633	0.352302	0.308553	0.604438	0.603588	0.166474	0.55804	0.0633371	0.454831	0.492049	0.421545	0.23645	0.287274
1812	chr5:37086408-37093990	0.467201	0.521615	0.49945	0.121894	1.08934	0.556275	0.652435	0.59033	0	0.343288	0.282126	0.397785	0.0154029	0.209601	0.818176	0.19525	0	0.816664	0.448399	0.601809	0	0.421036	0.598628	0.717148	0.0744202	0.481073	0.126683	0.424036	0	0.421073	0.292669	0.687935	0	0.309487	0.56902	0.391284	0.65452	0.573242	0.612518	0.448548	0.425263	0.725724	0.470681	0.422501	0.261185	1.04422	0.878574	0.756087
6106	chr1:173367995-173375971	0.832735	0.165284	0.685795	0.463493	0.402709	0.576872	0.394679	0.336704	0	0.380721	0.482744	0.44116	0	0.398497	0.277773	0.494951	0.294719	0.47774	0.799223	0.72464	0	0.343063	0.413862	0.502325	0	0.400147	0.301065	0.362783	0	0.343093	0.389498	0.653956	0.0281876	0.294201	0.856449	0.495944	0.466644	0.326957	1.21305	0.88832	0.551262	0.689879	0.447433	0.903674	0.372427	0.3102	0.574186	0.42279
2297	chr6:114997809-115004280	0.410552	0.407438	0.195062	0.285637	0.354539	0.237006	0.555952	0.138334	0	0.670363	0.462779	0.85446	0	0.245582	0.20542	0.0762558	0.0908132	0	0.262686	0.235039	0.106616	0	0.0637627	0.22112	0	0.140914	0	0.0993654	0.197423	0.211438	0.274327	0.0447793	0.243196	0.145046	0.222233	0.267431	0.191719	0.201494	0.358832	0.525547	0.407671	0.121472	0.275739	0.123757	0	0.152934	0.064337	0.573216
2737	chr8:12484548-12494314	0.453413	0.314982	0.258512	0.378549	1.08069	0.745985	0.920989	1.19165	0	0.133263	0.306656	0.077209	0	0.488197	0.362985	0.606362	0.16047	0.390184	0.391649	0.467238	0.141296	0.653776	1.01404	0.996354	0.0385194	0.606937	0.737666	0.855965	0.0872134	0.326917	0.590785	0.741813	0.115108	0.336395	0.920378	0.582263	0.296428	0.178024	0.198147	0.145103	0.510263	0.241476	0.411111	0.355361	0.304173	0.25335	0.298426	0.414366
1647	chr4:145832801-145842028	0.335928	0.285754	0.638426	0.133553	0.248654	0.332445	0.58487	0.323398	0	0.987325	0.278201	0.299635	0	0.473653	0.528256	0.401112	0	0.309731	0.506642	0.494529	0.0249248	0.395407	0.402476	0.372194	0.0815385	0.0988289	0.260251	0.452981	0	0.444872	0.0961988	0.628114	0.0974652	0.712088	0.272758	0.401917	0.761946	0.989215	0.880827	0.79861	0.540067	0.425968	0.773553	0.925828	0.107313	0.268148	0.135367	0.475116
3528	chr11:67882044-67889510	0.652382	0.647434	0.225426	0.536413	0.73751	0.924409	0.421636	0.399667	0.290321	0.871552	0.859527	0.201982	0	0.3725	0.356094	0.36352	0.157424	0.829351	0.512286	0.488926	0.092409	0.488659	0.386863	0.38331	0.0503842	0.977092	0.450279	0.818185	0.313712	0.977405	0.475544	0.0776246	0.150564	0.377154	0.529705	0.264909	0.664688	0.582147	0.570197	0.341637	0.314087	0.842284	0.238996	0.214532	0.729418	0.397664	0.501875	0.451666
4051	chr13:100080210-100088667	0.314151	0.467653	0.199014	0.327851	0.59684	0.680082	0.584939	0.882098	0.0150768	0.307774	0.708231	0.564669	0.0414282	0.516773	0.628743	0.583504	0	0.732178	0.452263	0.43164	0.0815817	0.269628	0.390326	0.236879	0	0.539131	0.340732	0.418185	0.0251777	0.377512	0.734696	0.171324	0.0531691	0.499445	0.552666	0.526208	0.586808	0.462545	0.411864	0.234584	0.589233	0.278848	0.316491	0.252528	0.409789	0.585119	0.393842	0.558244
3340	chr10:99818702-99827957	0.191378	0.379853	0.454639	0.565884	0.297482	0.16572	0.437326	0.612597	0.0137769	0.281239	0.462265	0.407357	0	0.386362	0.766049	0.319919	0	0.36026	0.505109	0.361558	0	0.492764	0.222922	0.401991	0	0.443385	0.570819	0.521089	0.0690212	0.492807	0.383631	0.657524	0	0.304257	0.776952	0.267134	0.625587	0.516593	0.585441	0.581834	0.570106	0.297276	0.482008	0.519203	0.588436	0.374271	0.629802	0.327931
911	chr3:32967572-32973250	0.54586	0.386943	0.5187	0.651045	0.242428	0.202576	0.475188	0.1051	0.0673636	0.381985	0.678086	0.309837	0	0.559749	0.390174	0.260712	0.137992	0.41941	0.449051	0.535718	0.121503	0.401569	0.508665	0.453593	0.0331237	1.20443	0.338312	0.396342	0.0374984	0.722888	0.46895	0.612386	0.158375	0.165299	0.569847	0.478931	0.801131	0.918519	0.204469	0.598933	0.464597	0.69217	0.314243	0.517141	0.261565	0.522867	0.219962	0.534484
5107	chrY:13252527-13259365	0	0	0	0	0	0	0	0	0	0	0	0	0	0.581008	0.647988	0.541228	0	0	0	0	0	1.20045	0.844774	1.08812	0	1.20017	0.561858	1.59856	0	0	0	0	0	0	0	0	0	0	0	0	0	0	0	0	0	0	0	1.3808
6056	chr1:143764840-143778331	0.32823	0.390889	0.654988	0.342544	0.408167	0.255802	0.733385	0.486621	0	0.225097	0.31713	0.372616	0.0952267	0.147254	0.262769	0.457241	0.0145208	0.247151	0.378025	0.541182	0.0340952	0.405665	0.336451	0.381849	0	0.337976	0.462803	0.476648	0	0.608551	0.592166	0.451085	0.0166656	0.347886	0.533017	0.568117	0.45983	0.354401	0.258193	0.504201	0.217285	0.378749	0.496012	0.514499	0.477086	0.330125	0.401205	0.49994
1256	chr3:185014729-185019517	0	0.0917707	0.439355	0	0.191654	0.240223	0.281749	0.124632	0	0.634164	0.446724	0.472395	0	0.414859	0.277611	0.0515272	0	0.0994709	0.0887506	0.254111	0	0.666677	0.172342	0.657421	0	0.285653	0.401185	0.268571	0	0.285744	0.185367	0.847225	0	0.392038	0.150166	0.671198	0.17273	1.17999	0.484937	0.8878	0.857017	0.902885	1.67689	0.780496	0	0.10334	0.086947	0.56339
1110	chr3:128828222-128834858	0	0.595963	0.951064	0.324959	0.345725	0.404449	0.745429	0.269789	0	0.522958	0.451274	0.454482	0.0703932	0.898037	0.66771	0.33462	0.0295185	0.574195	0.256156	0.366713	0.0346551	0.412327	0.0621775	0.301872	0.0850276	0.343526	0.506589	0.242238	0.0320858	0.343636	0.267507	0.523993	0.101636	0.495039	0.37924	0.48431	0.747812	0.916928	0.40823	0.298948	0.795073	0.177678	0.470548	0.402268	0.22381	0.223697	0.25095	0.40652
4772	chr19:52956502-52960553	0.765039	0.542312	0.31156	0.760383	1.13257	1.13566	0.554991	0.736504	0	0.214145	0.527977	0.12407	0	0.490315	0.437472	0.426295	0	0.470253	0.314679	0.30033	0.0567636	0.225125	0.611065	0.141272	0	0.562681	0.118539	0.31742	0	0.337717	0.438165	0.715231	0.166475	0.231672	0.443699	0.244086	0.408294	0.536389	0.191047	0.279808	0.0723497	0.194019	0.110105	0.263559	0.855379	0.366407	0.411045	0.249698
4268	chr15:49831193-49843599	0.214161	0.354227	0.440927	0.298	0.110965	0.247264	0.217505	0.048107	0.010278	0.244782	0.206918	0.202601	0.0564842	0.672554	0.678651	0.417671	0	0.345555	0.239799	0.343297	0	0.294094	0.299351	0.207621	0	0.257272	0.0387135	0.414665	0	0.183825	0.321976	0.373739	0	0.226985	0.260833	0.259077	1.23344	1.26129	1.80942	1.02805	0.803375	0.190094	0.575348	0.731644	0.279358	0.159553	0.503412	0.190281
1982	chr5:126838562-126845494	0.574879	0.887474	0.121395	0.355525	0.661929	1.10623	0.713604	0.25827	0	0.563209	0.92573	0.362566	0	0.343878	0.447442	0.249149	0	0.6871	0.306524	0.526585	0	0.46051	0.0595229	0.0412833	0	0.657719	0.48496	0.510171	0.0307159	0.592136	0.256086	0.334414	0.129729	0.609305	0.414912	0.17832	0.357942	0.43889	0.111657	0.367951	0.211424	0.623672	0.514809	0.385094	0.285673	0.356911	0.60059	0.145937
3527	chr11:67845549-67851894	0.558271	0.277019	0.39787	0.242757	0.50621	0.483424	0.496116	0.752427	0.0200944	1.23061	0.606816	1.1487	0	0.313072	0.628495	0.427734	0	0.525459	0.401853	0.287647	0	0.215617	0.130057	0.45102	0	0.215567	0.529819	0.557361	0	0.215636	0.559548	0.593689	0	0.443777	0.623275	0.155852	0.651752	0.821978	0.304964	0.759308	0.646747	0.0619419	0.0703036	0.420715	0.234073	0	0.196843	0.212581
1325	chr4:14169935-14175976	0.43977	0.800131	0.557185	0.407954	0.227863	0.888557	0.521078	0.592714	0	0.359036	0.637347	0.12481	0	1.05224	0.806811	0.653463	0.0324254	1.26148	0.351727	0.453179	0	0.754886	0.409804	0.331599	0.0934009	0.830183	0.874463	0.159656	0.246719	0.528467	0.440776	0.143899	0.111645	0.466105	0.357074	0.327387	0.0684545	0.431668	0.128123	0.18765	0.145562	0.520468	0.369204	0.220941	0.4917	0.982906	0.689157	0
4841	chr20:41594586-41602330	0.228715	0.11349	0.380336	0.318251	0	0.198051	0.929147	0.423854	0	0.784251	0.607695	0.129821	0.0150807	0.410434	0.286094	0.159305	0	0.553557	0.21951	0.392814	0.0593947	0.35334	0.159847	0.480417	0	0.824268	0.310083	0.290617	0	0.11779	0.171928	0.523869	0.0290319	0.363616	0.092853	0.670425	0.42722	0.673502	0.549731	0.768541	0.45422	0.659791	0.403231	0.827328	0.255722	0.447289	0.537623	0.740272
6255	chr1:247898556-247905892	0.36215	0.299502	0.11471	0.125981	0.250193	0.052266	0	0.0813497	0.695212	1.18266	1.63288	0.685203	0	0.108314	0	0.0336328	0.0534045	0.0649266	0.115858	0.207329	0.282139	0.559482	0.337472	0.351091	0.230746	0.683653	0.261861	0.306777	0.145123	0.18651	0.302481	0.2765	0.490342	0.255891	0.147025	0.202202	0.507349	0.118492	0.5803	0.231794	0.399565	0.482179	0.54727	0.181945	0.337428	0.40471	0.170256	0.229835
634	chr2:101237559-101245118	0.410045	0.465069	0.389643	0.285284	0.424922	0.35507	0.535435	0.552651	0	0.573887	0.282984	0.299246	0	0.946075	0.586189	0.359048	0	0.819148	0.337323	0.523154	0	0.482648	0.218345	0.378594	0	0.361902	0.825945	0.510391	0	0.301682	0.293559	0.536688	0	0.310428	0.570751	0.457887	0.492383	0.517487	0.511985	0.674869	0.271445	0.415961	0.649155	0.105947	0.458465	0.130924	0.220312	0.401499
912	chr3:33448363-33453503	0.602984	0.256462	0.327418	0.539382	0	0.0745917	0.0874859	0.232197	0	0.506351	0.416137	0.391156	0	0.154581	0.172402	0.57599	0	0.185321	0.41337	0.414246	0.0894791	0.266156	0.401354	0.556735	0	0.532188	0.280287	0.312728	0	0.532358	0.431688	0.22549	0.262422	0.82169	0.279769	0.529051	0.321807	0.338214	0.376445	0.38594	0.171072	0.382302	0.520692	0.259663	0.38525	0.288792	0.566956	0.393611
5464	chrX:71497988-71500132	0	0.614671	0.588551	0.287279	0.427893	0.715106	0	0.278258	0	0.80906	0.797897	0.234375	0	0.555736	0.413202	0.230083	0	0.444164	0.79259	0.425503	0	0.42527	0.384776	0.266869	0	0.212586	0.223925	0.899431	0	0.637961	0.620785	0.13511	0	0.218819	0.335266	0.576362	0.385643	0	0	0.396427	0.136672	0.183256	0	0.248938	0.230836	0.461439	0.582362	0.314461
2676	chr7:152040019-152043289	0.406159	0.13436	0.5146	0.282581	0.420895	0.351705	0.550003	0.547413	0	0.265276	0.523231	0.076847	0	0.364431	0.406444	0.22632	0	0.145633	0.389813	0.279029	0.0703167	0.139438	0.252322	0.350006	0	0.418218	0.293683	0.196604	0.260414	0.976153	0.135696	0.443002	0	0.143494	0.109928	0.529139	0.885116	0.930243	1.18331	0.43327	0.716994	0.600861	0.954762	0.244866	0.151373	0.302595	0.381891	0.618635
3403	chr11:10004937-10020706	0.140409	0.111475	0.320214	0.293063	0.145503	0.413385	0.484845	0.151392	0	0.412675	0.271321	0.446307	0	0.478737	0.365318	0.422487	0.0248465	0.0906214	0.377322	0.443715	0.0583402	0.260299	0.261682	0.435588	0.107355	0.231324	0.395951	0.611693	0.0135037	0.289247	0.281459	0.477812	0.0285165	0.44645	0.387619	0.611484	0.419634	0.578851	0.441794	0.521237	0.799361	0.199408	0.848725	0.846498	0.188386	0.345201	0.369654	0.791287
2699	chr8:7152780-7159835	0.878668	0.560574	0.656031	0.392994	0.845508	0.815212	0.828649	0.930484	0	0.491903	0.242558	0.0712491	0	0.450512	0.251224	0.209833	0	0.540098	0.542126	0.129351	0	0.258561	0.292427	0.486764	0	0.323127	0.340362	0.364565	0.120722	0.840399	0.314527	0.369658	0	0.532163	0.407679	0.245297	0.527554	0.369634	0.767977	0.361537	0.540121	0.835636	0.505835	0.416219	0.421039	0.140276	0.29506	0.286785
490	chr2:19922747-19929801	0.376625	0.685243	0.477181	0.349377	0.455338	0.543552	0.765015	0.0846014	0	0.491973	0.303241	0.391925	0	0.337932	0.565334	0.139909	0	0.135044	0.421713	0.215616	0	0.258598	0.994391	0.202847	0	0.387807	0.544656	0.31904	0	0.646552	0.503315	0.36971	0	0.931417	0.203869	0.245332	0.410378	0.184843	0.384043	0.321412	0.415536	0.390019	0.189715	0.378435	0.491282	0.631331	0.295102	0.286826
3164	chr9:128850236-128857457	0.245278	0.912815	0.757489	0.383961	0.76253	0.212393	0.871879	0.495871	0	0.300373	0.710948	0.382863	0.0970367	0.605216	0.368174	0.102505	0	0.659604	0.294258	0.42126	0	0.189464	0.285705	0.198157	0	0.0631399	0.0665077	0.13357	0	0.12632	0.676056	0.521677	0	0.129983	0.69704	0.342369	0.515428	0.481517	0.160784	0.274732	0.202964	0.163286	0.679536	0.295747	0.342801	0.548206	0.461245	0.140097
2059	chr6:2310409-2317792	0.179922	0.178558	0.51291	0.333811	0.3729	0.259667	0.304554	0.444576	0	0.411296	0.753297	0.374463	0	0.484313	0.240065	0.26735	0.0530646	0.516107	0.518044	0.45322	0.0934478	0.432383	0.335324	0.503904	0	0.185264	0.520389	0.60965	0	0.55597	0.180334	0.353237	0.0304513	0.254262	0.535659	0.602744	0.16804	0.353214	0.314513	0.230318	0.674937	0.425876	0.362524	0.614674	0.201168	0.26809	0.281954	0.685115
3690	chr12:8556766-8562284	1.04313	0.71669	0.609986	0.279133	0.166304	0.0694828	0.162988	0.108147	0	0.157224	0.620217	0.273274	0	0.359985	0.240891	0.357694	0	0.604197	0.616092	0.275624	0	0.247927	0.299092	0.414883	0	0.330492	0.34812	0.174785	0	0.247948	0.0804242	0.0525116	0	0.425229	0.521215	0.358411	0.374707	0.787623	0.210397	0.359506	0.212474	0.569789	0.161677	0.725636	0.897159	0.807038	0.829911	0.611088
2135	chr6:47308179-47315993	0.169999	0.224947	0.107694	0.236551	0.763391	0.392554	0.805721	0.687366	0.0163172	0.388613	0.438001	0.385976	0	0.457603	0.283531	0.72624	0.025069	0.243822	0.163158	0.272507	0	0.116725	0.686467	0.842354	0	0.233396	0.184383	0.411448	0	0.23347	0.340776	0.18542	0.172631	0.780778	0.552128	0.66442	0.105848	0.111245	0.148584	0.326424	0.112538	0.553284	0.627973	0.409959	0.443506	0.633261	0.69265	0.388398
4060	chr13:111189507-111199087	0.462215	0.137613	0.395296	0.321581	0.143696	0.120074	0.704152	0.373779	0.0133096	0.407549	0.267951	0.209888	0	0.414729	0.416286	0.206044	0	0.248599	0.221807	0.73034	0	0.333234	0.172288	0.179241	0.0196336	0.190375	0.401059	0.369169	0.0444533	0.428482	0.231636	0.544474	0.0938742	0.244947	0.225179	0.335494	0.215845	0.589809	0.96957	0.769186	0.397776	0.287192	0.558789	1.42117	0.155039	0.258268	0.347679	0.563214
2082	chr6:16455877-16464625	0.354319	0.200933	0.432887	0.28173	0.157361	0.394477	0.411261	0.204662	0.0291506	0.396716	0.342337	0.258578	0	0.499585	0.455873	0.507687	0.0447855	0.435585	0.4858	0.347736	0.105158	0.521319	0.471679	0.523429	0.064502	0.260599	0.439199	0.514533	0	0.104273	0.101466	0.828128	0.077101	0.321889	0.164395	0.367398	0.0945484	0.44716	0.530886	0.485961	0.335079	0.718863	0.356958	0.54929	0.226377	0.113131	0.380742	0.69387
5867	chr1:41944843-41953816	0.148044	0.195895	0.328248	0.171667	0.30683	0.170927	0.350831	0.299296	0	0.290077	0.238396	0.252095	0	0.177112	0.493826	0.329972	0	0.212332	0.331534	0.542428	0.0768908	0.304949	0.459853	0.574093	0	0.406505	0.32114	0.465802	0	0.304976	0.296765	0.484419	0	0.470728	0.320547	0.468398	0.87569	0.435949	0.733232	0.915969	0.947367	0.306617	0.248577	0.773526	0	0.275737	0.231997	0.8268
1520	chr4:94291864-94299580	0.229544	0.284754	0.490777	0.199629	0.237873	0.298154	0.466259	0.270704	0	0.337327	0.221782	0.0325731	0.0605416	0.875337	0.803969	0.511627	0	0.740754	0.440613	0.236543	0	0.768347	0.588233	0.44507	0.0487519	0.354539	0.560175	0.833346	0.137977	0.177326	0.632691	0.30044	0.0582745	0.304113	0.46595	0.256327	0.321577	0.281644	0.351098	0.18365	0.341901	0.203749	0.115627	0.415165	0.25665	0.641303	0.269787	0.305924
3031	chr9:26970921-26978133	0.245584	0.426512	0.408388	0.341724	0.38174	0.478481	0.685903	0.206871	0.0707163	0.300748	0.296598	0.487888	0.016193	0.275441	0.368634	0.34211	0	0.594385	0.2357	0.253072	0.0318877	0.3794	0.343274	0.396808	0	0.252875	0.599316	0.579524	0.177141	0.442673	0.430754	0.281253	0.0623464	0.26029	0.398806	0.548474	0.401388	0.662912	0.160984	0.432261	0.690938	0.272483	0.432972	0.518203	0.617812	0.54889	0.346365	0.3273
4696	chr19:27745647-27751364	0.232344	0.153722	0.441568	0	0.642065	0.536517	0.550604	0.260958	0.0223014	0.227628	0.299316	0.527527	0.102133	0.416948	0.0775025	0.604179	0	0.33324	0.594651	0.638477	0.241349	0.319064	0.360854	0.600666	0.29608	0.159495	0.504007	0.337405	0.186213	0.478638	0.543377	0.25342	0.196618	0.492516	0.503076	0.38918	0.361667	0.380106	0.338458	0.346995	0.461429	0.481214	0.46815	0.420229	0.346374	0.25965	0.582566	0
1797	chr5:32548455-32560424	0.332969	0.146864	0.140623	0.2574	0.383388	0.44851	0.526041	0.299179	0.0213065	0.32621	0.285963	0.461994	0.00975771	0.53113	0.333202	0.267998	0.0163671	0.47756	0.568122	0.63541	0.0192152	0.30483	0.413707	0.19129	0.0628603	0.457139	0.521649	0.402941	0.106744	0.228643	0.630379	0.314749	0.0939232	0.274484	0.240316	0.351162	0.794724	0.944187	0.485038	0.378874	0.489826	0.591103	0.372721	0.356873	0.289557	0.0826889	0.243502	0.535332
5860	chr1:36330038-36337263	0.551569	0.486565	0.524125	0.127916	0.063509	0.318413	0.124485	0.206498	0	0.660455	0.41449	0.313078	0	0.384924	0.183985	0.307345	0	0.593315	0.705829	0.336822	0.0636607	0.568077	0.228437	0.158438	0.0260323	0.315525	0.465296	0.222493	0	0.505001	0.368553	0.320854	0	0.324777	0.348327	0.410616	0.973047	0.661719	0.964169	0.941417	0.283992	0.489586	0.246967	0.295583	0.342612	0.410927	0.403366	0.186692
2648	chr7:138556758-138566149	0.424365	0.421147	0.224028	0.164026	0.293174	0.28581	0.430993	0.158875	0	0.230972	0.455571	0.160583	0	0.296152	0.283108	0.236465	0	0.355043	0.271525	0.323929	0	0.388503	0.307571	0.365695	0	0.534068	0.715978	0.445071	0.0906957	0.388537	0.283557	0.308573	0	0.599703	0.421136	0.368572	0.616528	0.32398	0.329694	0.422512	0.312139	0.460383	0.665039	0.483257	0.263598	0.316158	0.354675	0.359092
6265	chr22:19936446-19938701	0.785192	0.389619	0.559593	0.136572	0	0.339961	0.199364	0.132283	0	0.192313	0.37932	0.222843	0	0.176131	0.392872	0.109381	0	0.211155	0.376797	0.269711	0.101953	0.202173	0.731689	0.507478	0	0.404252	0.425814	0.427589	0	0.808763	0.196747	0.770776	0	0.416106	0.478156	0.657604	0	0.192681	0.343139	0.251281	0.649736	0.871195	0.9888	0.118345	0.658434	0.438735	0.369139	0.298989
5363	chrX:49307957-49316498	0.362906	0.668856	0.344849	0.721394	0.590971	0.583609	0.47388	0.454181	0	0.253956	0.200362	0.147136	0	0.418656	0.36316	0.288883	0.0458708	0.557675	0.348301	0.142465	0	0.213581	0.193244	0.167535	0	0.320297	0.168691	0.414073	0.199441	0.2136	0.259811	0.101784	0.184262	0.329689	0.420947	0.347355	0.919977	0.610662	0.634377	0.564103	0.1716	0.368142	0.365608	0.375067	0.289828	0.463492	0.682445	0.15793
4843	chr20:44670229-44679205	0.542646	0.636445	0.375015	0.617793	0.460091	0.683481	0.450917	0.531904	0	0.19332	0.619621	0.22401	0.156132	0.309843	0.493661	0.137442	0.0436481	0.583717	0.426116	0.372795	0.15373	0.101616	0.41373	0.318834	0.0419092	0.355573	0.535055	0.358189	0.0237221	0.101625	0.296666	0.0968514	0.0250476	0.261428	0.280385	0.330523	0.184294	0.484226	0.431169	0.284171	0.261255	0.306515	0.44729	0.148705	0.937665	0.165387	0.092768	0.112708
5803	chr1:896177-898458	0	0	0	0	0	0	0	0	0	1.90122	2.06249	1.76243	0	0	0	0	0	0	0	0	0	0	0	0	0	0	0	0	0.0933188	1.99887	0.389011	4.44496	0	0	0	0	1.9937	1.52389	2.88345	1.3663	0.128467	0	0	0	0	0	0	0
4360	chr16:30096935-30104154	0.429355	0.365227	0.466276	0.640112	0.254247	0.584243	0.622943	0.950682	0	0.300456	0.711145	0.278523	0	0.550348	0.552414	0.410134	0.027135	0.395872	0.412076	0.168551	0.0637136	0.252688	0.514411	0.237854	0.0260539	0.189472	0.266105	0.178142	0.0589899	0.126355	0.122953	0.12042	0.0622859	0.130019	0.348617	0.171232	0.114571	0.240825	0.321657	0.117775	0.162416	0.435549	0.247173	0.554679	0.480055	0.822537	0.173015	0.280271
882	chr3:20269429-20281828	0.964267	0.673412	0.542986	0.4721	0.481121	0.432957	0.108814	0.192536	0	0.174943	0.276047	0.141901	0	0.416578	0.178693	0.139302	0.0473986	0.11525	0.205658	0.19628	0.0185489	0.698867	0.698881	0.438559	0	0.220644	0.0774707	0.207449	0	0.2575	0.178976	0.186975	0.0181332	0.113557	0.231983	0.079761	0.6671	1.15683	0.624291	0.708613	0.685618	0.570605	0.79155	0.667464	0.239585	0.319286	0.369377	0.48957
3533	chr11:68867423-68874590	0.247125	0.551815	0.352244	0.34387	0.128046	0.267491	0.50197	0.374705	0	0.181581	0.358152	0.315611	0.0162946	0.443473	0.309123	0.275406	0.109327	0.199372	0.23718	0.25466	0.224615	0.445413	0.403	0.239579	0.0262429	0.445309	0.335044	0.448586	0.178253	0.127272	0.495381	0.121294	0	0.065481	0.551801	0.275959	0.403908	0.363858	0.377989	0.514061	0.695276	0.274193	0.373449	0.186234	0.414461	0.34521	0.40663	0.141152
4684	chr19:23864819-23872406	0.291808	0.173757	0.277289	0.121814	0.72575	0.404297	0.533459	0.550612	0	0.114354	0.169164	0.231888	0	0.418926	0.642429	0.390243	0	0.439452	0.448104	0.441035	0.0909355	0.120217	0.0543849	0.113159	0	0.480756	0.253199	0.29663	0.056129	0.360682	0.11699	0.152774	0.0296326	0.247426	0.379097	0.325855	0.163522	0.286432	0.255048	0.298835	0.386348	0.46623	0.235185	0.281482	0.58728	0.586985	0.658496	0.222232
5046	chrY:7392326-7401043	0	0	0	0	0	0	0	0	0	0	0	0	0	0.546939	0.914988	0.424577	0	0	0	0	0	0.889394	0.852042	0.656612	0.0431543	0.784578	0.936616	0.627012	0	0	0	0	0	0	0	0	0	0	0	0	0	0	0	0	0	0	0	1.3153
6107	chr1:173376648-173386043	0.235658	0.327419	0.358292	0.426287	0.341891	0.244876	0.526545	0.285854	0	0.461748	0.318764	0.401288	0	0.507473	0.282988	0.446465	0	0.608386	0.542818	0.485687	0.0244791	0.0485422	0.35136	0.456924	0.0200202	0.291186	0.306717	0.547546	0.0453285	0.194186	0.236197	0.37013	0.0478613	0.599448	0.382688	0.3421	0.484209	0.370106	0.576718	0.784331	0.49921	0.460187	0.522309	0.397807	0.105394	0.263353	0.265893	0.251257
3688	chr12:8319624-8324920	0.585226	0.663757	0.556107	1.10516	0.259911	0.0723949	0	0.338038	0	0.409532	0.403882	0.284727	0	0.450087	0.167325	0.372685	0	0.0899313	0.160478	0.172306	0	0.688846	0.23372	0.270169	0	0.516515	1.08813	0.424925	0	0.172227	0	0.21885	0	0.35444	0.203647	0.280075	0.0780823	0.0820633	0.146143	0.160531	0.221379	0.296835	0.168453	0.403225	0.280428	0.747432	1.02191	0.318349
6244	chr1:246527504-246535272	0.114004	0.395988	0.270829	0.118976	0.413491	0.345518	0.694707	0.422544	0	0.11169	0.38552	0.161775	0	0.511458	1.31197	0.349389	0	0.0613163	0.27354	0.3916	0	0	0.106236	0.036841	0	0.352166	0.432775	0.372496	0	0.234853	0.171397	0.186518	0.0289422	0.241662	0.185132	0.159132	0.532375	0.223807	0.597854	0.255389	0.452817	0.303578	0.287133	0.206193	0.382398	0.955516	0.964732	0.0868218
4153	chr14:53128745-53135507	0.392887	0.194953	0.808899	0.182231	0	0.28351	0.465526	0.132381	0.0377108	0.449063	0.1898	0.148672	0.207245	0.528784	0.262108	0.328386	0.260717	0.563497	0.502767	0.17994	0.0340095	0.134882	0.122038	0.169284	0.111258	0.337126	0.284086	0.332815	0	0.607021	0.328154	0.34282	0.0997422	0.277609	0.159503	0.511848	0.122313	0.707021	0.686785	0.628667	0.39013	0.406858	0.593719	1.10537	0.146427	0.21953	0.184706	0.59842
2014	chr5:147868278-147874526	0	0	0.067341	0.147915	0.0734383	0.368196	0.143948	0.14327	0	0.416571	0.410823	0.1609	0	0.699451	0.283667	0.394885	0.0313513	0.686077	0	0.389482	0.220841	0.36494	0.330191	0.412219	0.150512	0.291885	0.307453	0.257278	0	0.437967	0.213087	0.231886	0.575714	0.225333	0.920655	0.553949	0	0	0.0619396	0.0453585	0.0938265	0	0	0	0.475413	0.71276	0.199899	0.377791
1735	chr4:186241148-186247584	0.206392	0.546205	0	0.0957301	0.285174	0.297868	0.209616	0.278171	0	0.539206	0	0.117151	0	0.493834	0.413074	0.191676	0	0.444026	0.330143	0.330844	0	0.708564	0.769313	0.311251	0	0.779239	0.596947	0.549481	0	0.0708626	0.275819	0.270137	0	0.583337	0.614464	0.345709	0.706792	0.405179	0.300653	0.660506	0.409888	0.305331	0.415858	0.207384	0.153843	0.461296	0.0646868	0.366757
2126	chr6:38616529-38624444	0.16783	0.166558	0.47844	0.272455	0.579732	0.290659	0.227269	0.188499	0	0.383655	0.378361	0.381051	0	0.451764	0.167948	0.187037	0	0.421244	0.483229	0.53806	0	0.288089	0.417051	0.361568	0	0.633649	0.121354	0.284339	0	0.40336	0.168214	0.43933	0	0.533642	0.227118	0.624707	0.679235	0.768778	0.733439	0.537099	0.296272	0.248284	0.16908	0.539637	0.187649	0.312591	0.315606	0.383443
2953	chr8:126008502-126012155	0	0.601382	0.690992	0.337282	0.376778	0.734628	0.861619	0.32669	0	0.356206	0.585485	0.412753	0	0.217489	1.21281	0.607793	0	0.130368	0.348954	0.249782	0	0	0.225874	0.0783299	0	0.374381	0	0.263996	0	0.249667	0.242945	0.396568	0	0.256906	0.295216	0.473676	0	0.118963	0.211856	0.155142	0.320921	0	0.366294	0.292267	0.406521	0.270878	0.455817	0.0922987
5705	chrX:131712222-131717768	0.479014	1.02999	0.606907	0.222179	0.330929	0.553057	0.648661	0.215202	0	0.31286	0.539951	0.135947	0	0.286534	0.719025	0.22243	0	0.343513	0.383114	0.16454	0	0.411125	0	0.412789	0	0.328824	0.606135	0.115935	0	0.493394	0.480109	0.104493	0	0.423082	0.129646	0.222876	0.22369	0.0783647	0.488448	0.102198	0.475653	0.283457	0.402151	0.433184	0.267789	0.446091	0.375328	0.243201
3509	chr11:60101584-60108947	0.120274	0.537128	0.0571448	0.209198	0	0.364521	0.0610762	0.162103	0	0.294581	0.17431	0.307211	0	0.323752	0.421254	0.100528	0	0.388131	0.346301	0.247882	0.0937015	0.247747	0.0560392	0.155468	0	0.495379	0.195676	0.567641	0.144591	0.123884	0.241098	0.275486	0.061068	0.573643	0.3418	0.302191	0.336992	0.472232	0.578173	0.269434	0.07962	0.106758	0	0.145022	0.470668	0.940862	0.282719	0.549581
4627	chr19:15828861-15837304	0.262227	0.312286	0.299015	0.109465	0.163044	0.045414	0.106529	0.212055	0	0.565188	0.304031	0.148843	0	0.705859	0.682268	0.496801	0.0232016	0.338489	0.402678	0.648534	0.054478	0.054015	0.195487	0.135584	0	0.540024	0.170649	0.495039	0	0.594217	0.420522	0.514824	0.0798859	0.27793	0.212916	0.234258	0.440836	0.463312	0.366708	0.234973	0.138873	0.279311	0.211344	0.316184	0.469107	0.410262	0.246559	0.279585
4147	chr14:50893357-50901034	1.32658	0.686882	1.425	0.802572	0.239081	0.599337	0.527206	0.310947	0	0.395547	0.445817	0.163693	0	0.672775	0.346308	0.289252	0	0.372258	0.387495	0.277369	0	0.415827	0.483726	0.223666	0	0.29695	0.312789	0.335032	0	0.059409	0.115619	0.0754914	0	0.305658	0.140495	0.0644072	0.215474	0.169845	0.453705	0.0738331	0.305456	0.409569	0.290536	0.173864	0.580396	0.64456	1.35579	0.263552
2445	chr7:24789380-24795800	0.0689688	0.136891	0.327686	0.191937	0.142942	0	0.560368	0.139432	0	0.0675687	0.399819	0.274033	0.0181903	0.123766	0.345086	0.307446	0.152558	0.222566	0.19858	0.284287	0.107463	0.426198	0.385615	0.356602	0.0585919	0.497115	0.374022	0.600928	0	0.142078	0.345632	0.135405	0.0700365	0.219297	0.111999	0.308063	0.708554	0.473886	0.904206	0.927012	0.502222	0.918276	0.347412	0.831601	0.385565	0.231223	0.32424	0.315147
3921	chr12:132889550-132898380	0.300882	0.447901	0.23826	0.104668	0.259832	0.56451	0.305582	0.236555	0	0.294774	0.436061	0.0853924	0.0529045	0.899902	0.552004	0.47503	0.177479	0.593368	0.529418	0.344507	0	0.619775	0.04673	0.194463	0	0.361451	0.16317	0.218467	0.0723429	0.774786	0.30157	0.360993	0.101847	0.37205	0.0814343	0.503982	0.281012	0.590677	0.219149	0.19258	0.232378	0.534141	0.202082	0.393026	0.168206	0.336243	0.518659	0.152762
626	chr2:98752841-98762005	0.0966391	0.0959062	0.413238	0.336178	0.0500726	0.334731	0.441668	0.227935	0	0.189355	0.140056	0.191988	0	0.390198	0.338474	0.457718	0.0855055	0.519767	0.695624	0.232367	0.0752884	0.199063	0.360216	0.374753	0.266822	0.547295	0.419263	0.596431	0.185884	0.24885	0.33901	0.189729	0.171737	0.204852	0.313866	0.350722	0.451284	0.426863	0.675719	0.123708	0.287883	0.729124	0.194718	0.29131	0.324152	0.107996	0.136298	0.220792
3182	chr10:4948035-4956078	0.16516	0.273179	0.313884	0.114908	0.171152	0.572067	0.335479	0.370999	0	0.862971	0.744681	0.374988	0	0.148192	0.220368	0.0920303	0	0.0592201	0.211351	0.113464	0	0.283505	0.256509	0.142326	0	0.0566878	0.179134	0.199867	0	0.28353	0.110358	0.144113	0	0.4668	0.53641	0.276645	0.41134	0.432312	0.336825	0.528552	0.364447	0.537533	0.554633	0.365097	0.123108	0.123047	0.155292	0.167707
1051	chr3:104283483-104286311	0.156539	0.155352	0.2975	0.10891	0.97331	0.406655	0.794919	1.0549	0	0	0.151245	0.355414	0	0	0	0	0	0.336774	0.450717	0.645248	0	0.322448	0.437616	0.202345	0	0	0.169784	0.454643	0	0	0	0	0	0.331826	0.635513	0.52441	0.292402	0.768274	0.957732	0.300578	0.310881	0.277896	1.10393	0.283124	0.175024	0.524807	0.294372	0.596075
5208	chrY:21240222-21249982	0	0	0	0	0	0	0	0	0	0	0	0	0.0358979	0.692037	1.08962	0.682576	0	0	0	0	0.164946	0.841086	1.09922	0.469161	0	1.07447	0.590495	0.395304	0	0	0	0	0	0	0	0	0	0	0	0	0	0	0	0	0	0	0	0.691034
1142	chr3:142438903-142442703	0.116508	0.462499	0.110711	0.0810595	0.120736	0.201776	0.118328	0.549598	0	0.114143	0.450274	0.39679	0	0.313616	0.11659	0.259683	0	0.250653	0.223639	0.480244	0	0.239991	0.325708	0.376503	0	0.119968	0.252733	0.507572	0	0.240012	0.350325	0.457477	0	0	0.0945997	0.780613	0.979326	0.686171	0.610987	0.596569	0.154255	0.413663	0.352128	1.05361	0.130266	0.260402	0.109547	0
5411	chrX:57399224-57403517	0	0.10235	0.0980005	0.071753	0.427495	0.53583	0.209485	0.208499	0	0.101038	0.398577	0.117078	0	0.462682	0.309613	0.574671	0	0.221875	0.296944	0.566808	0.0535645	0.424874	0.288313	0.199966	0	0.743357	0.671149	0.449297	0.0991865	0.318684	0.103368	0.877399	0	0.546539	0.502431	0.518242	0.288963	0.404927	0.18028	0.726105	0.409633	0.0915425	0.1039	0.186529	0.230621	0.115252	0.19394	0
6036	chr1:121510068-121514123	0	0.216711	0.311253	0.22789	0	0.378181	0.554444	0.0735778	0	0.427868	0.105491	0.123948	0.0287968	0.195933	0.32778	0.182518	0	0.352342	0.628738	0.300034	0	0.337354	0.508718	0.141133	0	0.674551	0.592109	0.396384	0	0.224922	0.218866	0	0	0.231444	0.79787	0.182884	0.611837	0.428688	0.572575	0.279532	0.144557	0.581484	0.109997	0.460774	0.36623	0.732091	0.30798	0.332603
2219	chr6:78854115-78859151	0.263757	0.610766	0.417723	0.305844	0.637763	0.0761318	0.178584	0.414735	0	0.344537	0.254838	0.199616	0	0.473319	0.967788	0.0979805	0	0.28372	0.421904	0.422799	0	0.271651	0.163856	0.227292	0	0.271588	0.286074	0.383022	0	0.362233	0.440601	0.287683	0	0.652288	0.499705	0.147266	0.246338	0.345197	0.23053	0.168818	0.698418	0.156078	0.265722	0.159015	0.294903	0.491258	0.41333	0.0669564
1889	chr5:80891240-80901510	0.344931	0.342315	0.450682	0.239982	0.62553	0.597372	0.306529	0.174334	0.0744928	0.168965	0.374925	0.220261	0.0341154	0.348181	0.302026	0.240253	0.228894	0.231899	0.455193	0.236966	0.246331	0.310848	0.281249	0.278666	0.164832	0.443965	0.420881	0.156531	0.311002	0.310875	0.302505	0.338598	0.153244	0.27419	0.140034	0.433323	0.442958	0.465542	0.414533	0.193176	0.485224	0.153085	0.608125	0.415906	0.385662	0.192734	0.0810805	0.262689
5961	chr1:89337707-89345852	0.27182	0.64742	0.568249	0.264762	0.450691	0.0470753	0.496917	0.329718	0	0.106521	0.420204	0.0617154	0	0.195115	0.054402	0.121171	0	0.467828	0.260881	0.373477	0	0.223964	0.354617	0.210816	0	0.391846	0.766529	0.315784	0	0.223984	0.326929	0.24904	0.0276028	0.230478	0.264847	0.424948	0.406189	0.640348	0.380123	0.243569	0.43186	0.0482548	0.0547688	0.163875	0.364701	0.121506	0.306695	0.45542
1405	chr4:53236811-53255667	0.281815	0.349597	0.334741	0.147052	0.267703	0.447392	0.310068	0.253217	0.243448	0.414141	0.226904	0.253273	0.0681338	0.400365	0.23501	0.261721	0.436358	0.429455	0.360631	0.419478	0.121974	0.411186	0.262612	0.27321	0.219463	0.266	0.178301	0.289881	0.44043	0.169327	0.14123	0.261272	0.286178	0.224018	0.152547	0.275359	0.350938	0.530193	0.4721	0.315657	0.40421	0.375219	0.260254	0.45307	0.315093	0.367424	0.287058	0.608093
5427	chrX:63358010-63364629	0.401373	0.265553	0.127134	0.0930837	0.27729	0.347561	0.407642	0.135241	0	0.131075	0.452433	0.303766	0	0.180069	0.26777	0.186378	0	0.215876	0.642034	0.229784	0	0.275591	0.311686	0.216176	0	0	0.290223	0.097144	0	0.344518	0.335243	0.306447	0	0.283606	0.380213	0.261452	0.124955	0.328315	0.175405	0.556614	0.398557	0.415647	0.269575	0.201651	0.373975	0.672816	0.628986	0.560401
4833	chr20:34126942-34136575	0	0.182475	0.17472	0.0319812	0.19054	0.199022	0.0466852	0.0929307	0.0132364	0.180136	0.222064	0.287008	0.0242474	0.0824894	0.0459995	0.128069	0.0610072	0	0.264704	0.315792	0.119372	0.331401	0.128505	0.237673	0	0.47332	0.348996	0.26701	0	0.189389	0.184289	0.872383	0	0.14616	0.0746467	0.333648	0.472247	0.270722	0.241059	1.55933	0.152149	0.204008	0.416786	0.609683	0.154186	0.359586	0.129662	0.455094
750	chr2:174202252-174216415	0.0625316	0.217201	0.534782	0.15227	0.226801	0.297814	0.285787	0.273906	0	0.336942	0.0604169	0.266203	0	0.168322	0.375452	0.121953	0.0276637	0.100897	0.180045	0.300712	0.0162388	0.128806	0.233082	0.222281	0	0.289747	0.305201	0.431332	0.0451045	0.22543	0.0626746	0.572912	0	0.198828	0.177705	0.244396	0.525617	0.521725	0.683176	0.740431	0.43465	0.166514	0.755967	0.810532	0.139831	0.314462	0.146988	0.904819
4181	chr14:71124207-71131040	0.129602	0.192928	0.369459	0.180338	0.134304	0	0.197439	0.0873373	0	0.0634853	0.250437	0.331036	0	0.17443	0.129692	0.288866	0	0.348527	0.248772	0.0890355	0.0673123	0.266961	0.0603852	0.125644	0	0.400348	0.421702	0.423459	0	0.133492	0.129898	0.424073	0.032902	0.274725	0.263077	0.253265	0.423649	0.254427	0.962837	0.29033	0.686359	0.46015	0.456984	0.781345	0.0724528	0.434498	0.426503	0.394802
715	chr2:152701399-152709042	0.347605	0.11499	0.275258	0.120921	0.30018	0.0501669	0.294195	0.351372	0.0166823	0.28379	0.391825	0.230189	0	0.363875	0.289874	0.290538	0	0.249276	0.111205	0.199002	0.0300898	0.537012	0.269932	0.411877	0	0.298271	0.251344	0.462717	0.0278589	0.835426	0.232266	0.492877	0	0.245614	0.470399	0.485202	0.162324	0.568667	0.506358	0.222484	0.268462	0.205695	0.233462	0.663622	0.323876	0.258971	0.108945	0.220604
2371	chr6:148639772-148645510	0.15433	0.229739	0.513277	0.107373	0	0.400916	0	0	0.866571	0	0.223666	0.131399	0.0407039	0.0692371	0	0	1.33136	0.33202	0.148119	0.265059	0.801555	0.317897	0.21572	0.199489	0.786657	0.238367	0.167388	0.0560283	1.1874	0.238444	0.232024	0.100997	1.88063	0.408928	0.0626543	0.301588	0.0720687	0.227229	0.202332	0.345725	0.153247	0.136987	0.155479	0.0465213	0.345107	0.5174	0.145109	0.0587662
749	chr2:172542091-172548758	0.265656	0.395462	0.252438	0.231034	0.206471	0.230039	0.674513	0.179023	0.0382481	0.520526	0.32084	0.15079	0.0175165	0.417136	0.398763	0.148029	0.675769	0.142881	0.191224	0.319382	0.17247	0.0684017	0.247554	0.128772	0.169265	0.478701	0.360167	0.289334	0.28743	0.205223	0.332829	0.43463	0.0337211	0.140782	0.161776	0.148326	0.372167	0.521523	0.522427	0.637624	0.439654	0.471606	0.802903	0.680677	0.148513	0.371096	0.124892	0.252894
5476	chrX:73527958-73536417	0.209385	0.311695	0.149225	0.182096	0	0.498609	0.0531637	0.246929	0	0.205134	0.354032	0.326836	0	0.422714	0.36668	0.291683	0	0.900929	0.452156	0.395577	0.0271875	0.808692	0.195117	0.202991	0	0.0539003	0.454202	0.304063	0.0251718	0.269588	0.419727	0.41108	0.0531566	0.221923	0.425028	0.263042	0.342224	0.102763	0.320263	0.134017	0.311873	0.232319	0.26368	0.252469	0.409692	0.409486	0.442967	0.239191
4097	chr14:30965849-30972548	0.396581	0.393573	0.376849	0.229931	0.0684949	0.171706	0.537033	0.133626	0.0380654	0.582795	0.447031	0.262622	0	0.47445	0.132286	0.220983	0.029241	0.213298	0.317184	0.317857	0	0.068075	0.184779	0.299033	0	0.476414	0.286757	0.143976	0.127136	0.272324	0.198744	0.821854	0.03356	0.0700549	0	0.405948	0.185195	0.324395	0.346621	0.338442	0.393798	0.176007	0.399534	0.27894	0.295607	0.590917	0.124295	0.553709
4623	chr19:12451192-12454278	1.00419	0	0	0.299424	0.148661	0.372668	0	0.0966736	0	0.281088	0.277209	0.569992	0	0.257435	0	0.479619	0.126929	0.617255	0.550731	0.197107	0	0.295499	0.267361	0.185434	0	0.29543	0	0.312485	0	0.295525	0	0.375525	0	0.45614	0.34944	0.320388	0.267964	0.422439	0.501536	0.918189	0.284899	0.127335	0.289049	0.259461	0.160396	0.320631	0	0.218503
5680	chrX:120146456-120156069	0.368503	0.594276	0.043771	0.0961433	0.620543	0.757857	0.140347	0.527703	0	0.40615	0.311536	0.156875	0	0.289314	0.368761	0.205337	0	0.0990985	0.221046	0.221514	0	0.474415	0.429241	0.208396	0	0.379444	0.349722	0.200674	0	0.427011	0.184673	0.211013	0.023388	0.39057	0.224406	0.231468	0.344167	0.180857	0.281821	0.147413	0.121973	0.163546	0.23203	0.166623	0.566524	0.205905	0.259864	0.42096
2946	chr8:119873659-119878636	0.266883	0.176573	0	0.247575	0.368755	0.385171	0.180701	0	0	0.261466	0.257858	0.252478	0	0.718394	0.178047	0.247854	0	0.287083	0.256143	0.122232	0.0462045	0.183247	0.414496	0.287482	0.0755763	0.0916024	0	0.0645935	0.299452	0.824685	0.267494	0.0582185	0.451692	0.282865	0.433395	0.149011	0.249258	0.349288	0.155508	0.341637	0.412239	0.394821	0.0896236	0.321799	0.397864	0.397664	0.669167	0.1355
4757	chr19:51804688-51811880	0.246266	0.305498	0.234013	0.0428343	0.255201	0.319874	1.00045	0.539359	0	0.0603168	0.178454	0.104838	0.0974279	0.77338	0.862537	0.754735	0.0272368	0	0.0590889	0.253775	0	0.0634092	0.516342	0.198956	0	0.380367	0	0.268216	0.0296056	0.317074	0.185122	0.120872	0.125039	0.39152	0.649861	0.309375	0.0575006	0.302161	0.322864	0	0.285295	0	0.310125	0.14847	0.41302	0.275208	0.752545	0.140661
5876	chr1:46380900-46391052	0.305323	0.346294	0.290131	0.455196	0.452	0.377697	0.442987	0.323328	0	0.21366	0.379282	0.34661	0	0.352227	0.21824	0.291654	0	0.328431	0.460484	0.449475	0	0.179692	0.203227	0.225523	0	0.449125	0.189232	0.316701	0	0.134781	0.437172	0.114178	0.0221464	0.184918	0.38957	0.267886	0.0814739	0.256883	0.381228	0.362926	0.173246	0.232296	0.175769	0.157777	0.487681	0.389948	0.28708	0.465048
1127	chr3:133429748-133437214	0.296537	0.235431	0.338139	0.206313	0.122918	0.667629	0.301169	0.319734	0	0.290517	0.229207	0.235646	0	0.478929	0.415443	0.396567	0	0.701758	0.341524	0.122232	0	0.305412	0.276331	0.191655	0	0.488546	0.0643255	0.215312	0.0285193	0.122176	0.237772	0.0776246	0.0301128	0.440013	0.57786	0.397363	0.166172	0.232859	0.311017	0.113879	0.274826	0.526427	0	0.321799	0.132621	0.331387	0.223056	0.225833
3517	chr11:62375665-62382984	0.241994	0.120079	0.287441	0.547185	0.250774	0.314324	0.245773	0.448463	0	0.118541	0.23381	0.480756	0	0.488547	0.423786	0.202265	0	0.195232	0.174191	0.20781	0.0314216	0.311545	0.28188	0.391007	0.334074	0.249178	0.393704	0.439271	0	0	0.18191	0.118775	0.184305	0.0641213	0.147366	0.23645	0.056503	0.178151	0.317263	0.154888	0.120148	0.536999	0.121898	0.218841	0.338212	0.608475	0.398186	0.0460737
3741	chr12:26777173-26782083	0.18035	0.178982	0.257064	0.313691	0.280339	0.0780851	0.641082	0.182304	0	0.0883443	0.0871253	0.102369	0	0.0809105	0.180476	0.301483	0	0.0969999	0.259637	0.867294	0.0936697	0.185747	0.252091	0.349685	0	0.185704	0.195609	0.327374	0	0.371527	0.361524	0.767166	0	0.0955748	0.146436	0.654524	0.505317	0.354054	0.94578	0.808029	0.417863	0.160083	0.454232	0.924202	0.100823	0	0.084787	0.48072
4183	chr14:73126645-73134839	0.108078	0.268145	0.15405	0.0751939	0.391996	0.514733	0.548829	0.29133	0.0155606	0.211767	0.469903	0.276059	0.142526	0.775793	0.270384	0.301115	0.0239066	0.406902	0.363049	0.408368	0.224533	0.278281	0.402853	0.139703	0.183633	0.33386	0.234445	0.156948	0.233872	0	0.162487	0.389009	0.0274377	0.11455	0.351017	0.211204	0.35329	0.212173	0.283388	0.172938	0.321958	0.239831	0.108883	0.195474	0.36252	0.543507	0.254051	0.0411543
1992	chr5:131571798-131582180	0.298559	0.59259	0.324233	0.385765	0.176795	0.517063	0.563127	0.632331	0	0.083571	0.329672	0.0484189	0.0224983	0.65058	0.34145	0.118831	0.0377375	0.367036	0.450283	0.0879036	0.177217	0.175711	0.07949	0.330792	0	0.131753	0.18504	0.185811	0.287137	0.0878633	0.470237	0.446594	0.368149	0.271232	0.0692619	0.357208	0.199173	0.627982	0.186391	0.163794	0.141174	0.22715	0.300783	0.359992	0.333815	0.476638	0.360927	0.0974456
3659	chr11:122824428-122834651	0.173258	0.214931	0.288116	0.180814	0.0897722	0.337567	0.39592	0.116757	0	0.297047	0.0836996	0.147516	0	0.42751	0.303415	0.120679	0.0574866	0.279558	0.457286	0.357083	0	0.133833	0.161452	0.0559893	0	0.446006	0.422816	0.345952	0	0.535378	0.390723	0.510232	0	0.459084	0.211017	0.314394	0.444994	0.170066	0.795018	0.277235	0.200717	0.230683	0.130912	0.391704	0.290576	0.338835	0.203633	0.362857
2613	chr7:121315380-121322301	0.063977	0.126984	0.182381	0.133534	0.198894	0.498596	0.389857	0.258681	0	0.68946	0.927201	0.0726283	0.0168737	0.172212	0.128044	0.0356492	0.0283031	0.481734	0.736827	0.439518	0.0332283	0.197675	0.298087	0.165396	0	0.263506	0.20817	0.139359	0	0.329487	0.19237	0.125605	0.129935	0.542465	0.311679	0.178604	0.179255	0.251193	0.447339	0.204742	0.465873	0.340725	0.19336	0.231423	0.0715317	0.571966	0.0601544	0.146168
1909	chr5:97308888-97318147	0.0478238	0.0949222	0.0454443	0.133092	0	0.124236	0.194283	0.0966841	0	0.655942	0.277239	0.407181	0	0.0429105	0.239287	0.15989	0	0.15433	0.0917984	0.164273	0.0248387	0.246276	0.35652	0.30909	0	0.590924	0.259351	0.416691	0	0.88667	0.527265	1.00151	0	0.253438	0.0776616	0.133509	0.49132	0.751083	0.417992	0.581583	0.379906	0.339597	0.33726	0.8073	0.427769	0.267221	0.179866	0.291369
5480	chrX:74121599-74130555	0.29665	0.1472	0.0939632	0.206391	0.461119	0.470943	0.351497	0.433137	0	0.387504	0.429927	0.392892	0.0260801	0.443621	0.247381	0.385698	0	0.212735	0.0949038	0.237763	0	0.356449	0.138218	0.127818	0.0630042	0.458186	0.268125	0.287191	0	0.560184	0.198219	0.55005	0	0.157207	0.240866	0.303656	0.184706	0.485307	0.259279	0.284806	0.261839	0.219428	0.249049	0.417305	0.11056	0.331513	0.232438	0.0753063
2256	chr6:88662251-88670881	0.256545	0.15276	0.243781	0.285582	0.159512	0.17772	0.312663	0.20746	0	0.452407	0.148722	0.407732	0.0811956	0.0920754	0.10269	0.200133	0	0.0551925	0.344709	0.422988	0.0266488	0.211379	0.286877	0.232131	0.0217946	0.422659	0.278252	0.521568	0	0.317096	0.205706	0.402936	0	0.32629	0.291625	0.229182	0.239603	0.705092	0.448454	0.459765	0.475525	0.273259	0.465221	0.866133	0.0573679	0.286695	0.337704	0.781507
1303	chr4:9121945-9131359	0.141109	0.326758	0.223481	0.261801	0.243715	0.244382	0.477711	0.285277	0.243797	0.506898	0.272675	0.373779	0	0.295429	0.235347	0.524193	0	0.404772	0.225718	0.161569	0.0732892	0.435998	0.438314	0.334402	0.0199798	0.145299	0.102033	0.102458	0.045237	0.242242	0.23572	0.0923457	0.0477647	0.249266	0.49649	0.23636	0.307511	0.415529	0.123333	0.301057	0.280239	0.208754	0.236934	0.255217	0.473317	0.105129	0.442261	0.322393
3104	chr9:90903904-90911679	0.170852	0.282594	0.378819	0.237737	0.118034	0.147946	0.0578402	0.345407	0	0.390562	0.220099	0.258608	0	0.357698	0.569906	0.253872	0	0.367567	0.273294	0.117374	0	0.234621	0.31842	0.220847	0	0.351849	0.185308	0.248107	0	0.234641	0.171243	0.11181	0	0.362166	0.277449	0.222584	0.212758	0.167704	0.298658	0.218708	0.52781	0.353856	0.516373	0.480684	0.127351	0.381862	0.53548	0.216859
627	chr2:99270799-99278498	0.172538	0.34246	0.327907	0.0800278	0.476796	0.298812	0.292055	0.542603	0	0.112691	0.444543	0.228515	0	0.25802	0.402872	0.128189	0.0254434	0.556792	0.33119	0.276577	0	0.118468	0.321563	0.33454	0.0488596	0.355322	0.374274	0.167037	0	0.177718	0.288222	0.489292	0.116806	0.365741	0.280187	0.224781	0.0537146	0.508078	0.402141	0.36811	0.114219	0.204199	0.231764	0.485428	0.257217	0.385631	0.324459	0.306599
3601	chr11:94641601-94648049	0.618024	0.47704	0.652526	0.621088	0.426965	0.237851	0.139484	0.370205	0	0.336377	0.597124	0.233866	0	0.246458	0.0687175	0.191319	0	0.295467	0.0659058	0.330228	0	0.77797	0.575911	0.399435	0	0.212124	0.372398	0.19944	0	0.353654	0.275305	0.179756	0	0.145563	0.223026	0.191703	0.128269	0	0.300093	0	0.0454584	0.0609526	0.138361	0.0827991	0.307113	0.537177	0.387399	0.156889
3505	chr11:58996951-59006462	0.232784	0.0924075	0.132721	0.161957	0.289476	0.201575	0.23642	0.345116	0.0134061	0.182447	0.269894	0.290689	0	0.0417737	0.093179	0.181597	0.0617896	0.200322	0.223416	0.159921	0.0967225	0.287701	0.303691	0.210631	0.138432	0.335574	0.302976	0.202826	0.447757	0.479544	0.233316	0.639828	0.283666	0.148034	0.302417	0.259944	0.347857	0.274194	0.406918	0.387383	0.339021	0.3306	0.328325	0.505229	0.520545	0.260142	0.131325	0.212737
2679	chr7:153405751-153413806	0.329828	0.272772	0.313417	0.0764914	0.512691	0.285608	0.334979	0.259312	0	0.269277	0.371786	0.374429	0	0.443913	0.0550098	0.27568	0	0.295659	0.369313	0.302119	0	0.509548	0.307353	0.0355285	0	0.396223	0.298112	0.439053	0	0.39635	0.165291	0.143899	0.0558223	0.349579	0.0892684	0.153463	0.513409	0.0539584	0.38437	0.175922	0.400294	0.341557	0.166142	0.231988	0.4917	0.36859	0.206747	0.0837287
1975	chr5:124966327-124972226	0.150118	0.893878	0.142649	0.208886	0.544476	0.714955	0.381157	0.151745	0	1.32364	0.797728	0.596463	0	0	0.0751117	0.209122	0	0.32296	0.360192	0.206261	0	0.154611	0.349722	0.0485114	0	0.231863	0.16282	0.217998	0	0.0773123	0.150461	0.442086	0	0.795538	0.365668	0.460992	0.420612	0.368381	0.459224	0.192166	0.447195	0.399746	0.37809	0.407266	0	0.0838802	0.0705744	0.171488
4862	chr21:14115154-14124623	0.0467633	0	0.13331	0.0325351	0.14538	0.404937	0.379949	0.0630267	0	0.183256	0.180728	0.318522	0	0.167836	0.467961	0.0781723	0	0.201211	0.224407	0.353387	0	0.144489	0.13073	0.302236	0	0.722276	0.65936	0.407451	0	0.289003	0.140611	0.306031	0	0.446073	0.227818	0.287207	0.43675	0.459017	0.326978	0.419032	0.433395	0.415083	0.141335	0.394699	0.104571	0.209036	0.131908	0.178067
6196	chr1:221965965-221971618	0	0	0.0744277	0.0544937	0.2435	0.203471	0.159096	0.158347	0	0.306939	0.756761	0.444582	0.0206579	0.843335	0.391899	0.436441	0	0.589771	0.375864	0.0538087	0.0813605	0.403345	0.145975	0.101244	0	0.0806503	0	0	0	0.322704	0.235512	0	0.0795374	0.415076	0.254385	0.393585	0.512065	0.153763	0.136916	0.150395	0.311101	0.417138	0.0789081	0.283324	0.525443	1.22542	0.810095	0.0596497
4453	chr17:43323163-43333941	0.246506	0.366955	0.312322	0.171504	0.127725	0.177881	0.20863	0.30455	0.035491	0.201252	0.15878	0.396441	0	0.184317	0.246679	0.0915721	0.0545267	0.176776	0.197155	0.225798	0.12803	0.338512	0.267994	0.318639	0	0.296129	0.401045	0.387801	0.138294	0.211588	0.205892	0.295754	0.229462	0.478991	0.400304	0.596413	0.460453	0.403274	0.502722	0.420737	0.0271974	0.109403	0.206952	0.396305	0.0459358	0.0459127	0.193148	0.0625771
1882	chr5:76357245-76363340	0.290583	0.288379	0.276125	0.0505425	0.301126	0.566155	0.0737804	0.146866	0	0.213513	0.491323	0	0.11496	0.260729	0.581574	0.161919	0.128553	0.547009	0.278889	0.299443	0.0754613	0.14964	0.541565	0.375613	0	0.374013	0.709132	0.316483	0	0.22448	0.0728119	0.190165	0	0.615968	0.176955	0.243365	0.407089	0.285229	0.0634942	0.278981	0.288544	0.451375	0.0731868	0.218984	0.243672	0.4871	0	0.110649
5287	chrX:3553143-3560161	0.189278	0.375686	0.299768	0.175585	0.588437	0.437072	0.320391	0.425177	0	0.370872	0.548633	0.358123	0	0.113222	0	0.140626	0	0.407209	0.242215	0.130033	0	0.389887	0.411555	0.244665	0	0.259864	0.342156	0.183244	0.0303396	0.324934	0.126474	0.578054	0	0.267484	0.3586	0.317044	0.766039	0.309652	0.551447	0.524973	0.167067	0.336017	0.190688	0.266263	0.211629	0.352538	0.415262	0.096099
5620	chrX:103762322-103765692	0.26274	0.130374	0.124834	0.0913993	0	0.455029	0.133422	0.177058	0	0.257406	0.380782	0.223702	0	0	0.394387	0.439212	0	0.565252	0	0.270751	0	0.270604	0	0	0	0	0	0	0	0.947196	0.658352	0.343888	0.133404	0.835422	0.426667	0.293396	0.368083	0.644748	0.229641	0.25225	0.173931	0.233215	0.264697	0.316803	0.587532	0.146809	0.123521	0.100047
4146	chr14:50544972-50554903	0.0445881	0.221249	0.254217	0.155108	0.231029	0.270271	0.271707	0.150237	0	0.393146	0.129241	0.227779	0	0.200036	0.133858	0.347835	0.118353	0.191851	0.299556	0.398212	0	0.413303	0.498597	0.115271	0	0.50503	0.338525	0.323748	0	0.367412	0.08938	0.291796	0.0226392	0.378065	0.362035	0.273847	0.291504	0.350132	0.623537	0.228309	0.472269	0.395775	0.224601	0.618271	0.249266	0.199313	0.167696	0.305612
1058	chr3:107564215-107572787	0.154969	0.102529	0.343602	0.107818	0.160591	0.134192	0.157389	0.278485	0.966844	0.0506076	0.149728	0.205245	0.585838	0.370793	0.0516924	0.172703	0.82269	0.277829	0.198309	0.070975	0.643899	0.159607	0.0962726	0.16693	0.482726	0.319139	0.224108	0.187534	0.81972	0.106414	0.36242	0.473272	0.629471	0.0547495	0.16777	0.346099	0.0964895	0.253522	0.180595	0.198375	0.376154	0.183405	0.104082	0.498282	0.173268	0.288635	0.194279	0.196699
3388	chr11:4495395-4498723	0.266055	0.528074	0.379226	0	0.275708	0.230385	0.27021	0.268938	0	0	0.128529	0.302033	0	0.238721	0.532483	0.148251	0	0.429288	0.255348	0.0913891	0	0.411027	0.371889	0.171954	0	0	0.144283	0.386358	0	0	0	0.0870567	0	0.422981	0.540062	0.297097	0.248484	0	0.465077	0.170288	0.440314	0.236157	0.134018	0.0801999	0.594944	0.148661	0.500317	0.607857
5833	chr1:19267276-19283509	0.163674	0.162433	0.259218	0.189791	0.169613	0.259839	0.110821	0.128682	0.0785507	0.213802	0.210853	0.232259	0.00719477	0.318195	0.327578	0.288808	0	0.264094	0.340356	0.262368	0.085009	0.449528	0.152521	0.317353	0.0231747	0.252801	0.266285	0.39614	0.0655887	0.477666	0.355439	0.464156	0.0554028	0.346952	0.177195	0.228464	0.356685	0.294541	0.262268	0.436499	0.252818	0.242136	0.384751	0.509828	0.152502	0.091455	0.205194	0.311623
2281	chr6:106230953-106235418	0.19832	0	0.471131	0.206969	0	0.343462	0.201417	0.735053	0	0.194294	0.28742	0.337707	0	0.533835	0.793836	0.221016	0	0.42666	0.190339	0	0.257508	0.204255	0.184806	0.192264	0	0.204208	0.32265	0.143998	0	0.204273	0.0993867	0.389357	0	0.210196	0.0805135	0.775107	0.277834	0.486665	0.693346	0.317337	0.0656428	0.264051	0.499492	0.478254	0	0	0.0932353	0.604137
3880	chr12:94355584-94362873	0.303737	0.301433	0.230899	0.169057	0.125903	0.157809	0.431873	0.368434	0.0349847	0.119028	0.0586931	0.137924	0	0.327038	0.24316	0.304647	0.0268744	0.261381	0.349816	0.0417331	0	0.312827	0.226432	0.157047	0	0.437857	0.0658873	0.352863	0	0.500568	0.243545	0.556566	0	0.321926	0.0986484	0.169588	0.113471	0.65591	0.530947	0.194407	0.201071	0.323525	0.244799	0.439482	0.0679208	0.20366	0.114236	0.13879
6221	chr1:230601216-230609014	0.170348	0.28176	0.0539575	0.079012	0	0	0.0576696	0.0382654	0	0.16689	0.21945	0.161153	0	0.611388	0.170468	0.348045	0.0251204	0.427563	0.21799	0.195047	0	0.175446	0.15874	0.0366992	0	0.0584686	0.307936	0.123688	0.109221	0.175462	0.284563	0	0.259478	0.421281	0.783786	0.887711	0	0.111473	0.0496295	0.0363438	0.187948	0.201607	0.0572056	0	0.380928	0.31728	0.16017	0.129732
2013	chr5:147715837-147734078	0.194211	0.21683	0.346026	0.05067	0.125785	0.189194	0.443798	0.114517	0	0.332969	0.422196	0.372048	0	0.0653467	0.14576	0.121745	0	0.182796	0.139796	0.250165	0.0126086	0.425049	0.180977	0.18828	0	0.249971	0.421286	0.405414	0	0.325066	0.291982	0.301854	0	0.411681	0.413937	0.43374	0.272077	0.142974	0.424362	0.0776902	0.514261	0.344772	0.195657	0.160993	0.027143	0.271293	0.0684775	0.443714
4651	chr19:21197736-21207006	0.143301	0.189619	0.181562	0.132934	0.0990003	0.206815	0.194052	0.128759	0	0.280784	0.0923034	0.271132	0	0.214298	0.143402	0.186317	0	0.256912	0.458447	0.393788	0	0.245983	0.0445122	0.123489	0	0.590223	0.207235	0.416197	0	0.442809	0.191505	0.56268	0	0.40502	0.426632	0.266702	0.223062	0.328209	0.793242	0.4586	0.411077	0.0847985	0.288737	0.345575	0.213631	0.160142	0.0898261	0.545668
5892	chr1:54630790-54639598	0.301634	0.149673	0.573251	0.48967	0.312577	0.217661	0.20423	0.271024	0	0.0985035	0.0971444	0.142676	0	0.451075	0.40246	0.420191	0	0.270386	0.0964983	0.172684	0	0.310661	0.187387	0.162457	0	0.310589	0.272629	0.219012	0	0.207126	0.352711	0.197397	0.0255253	0.372979	0.489826	0.308758	0.375618	0.542806	0.52727	0.193061	0.0665594	0.267738	0.45582	0.18185	0.168626	0.168541	0.0945372	0.114857
794	chr2:206804465-206812627	0.108501	0.430714	0.206206	0.150977	0.168657	0.140932	0.27549	0.329031	0.0312432	0.106299	0.524161	0.215554	0	0.194709	0.217155	0.0906887	0.0240003	0.700281	0.260337	0.18635	0.140883	0.279372	0.404432	0.0701255	0.0460883	0.111723	0.176523	0.0787815	0.130438	0.223517	0.163124	0.284025	0.0550906	0.172498	0.220246	0.121161	0.304007	0.159753	0.426748	0.277785	0.287307	0.626006	0.327928	0.490602	0.485255	0.545638	0.306056	0.165262
3598	chr11:94118269-94125657	0.1798	0.356874	0.284757	0.0833962	0.124216	0.155695	0.304348	0.28272	0	0.234867	0.115813	0.136076	0	0.107552	0.239902	0.0333961	0	0.515757	0.230086	0.370566	0	0.432091	0.614345	0.271149	0	0.246852	0.130009	0.348135	0	0.0617326	0.120141	0	0	0.127045	0.0486633	0.0669263	0.391828	0.176488	0.0523833	0.153442	0.396753	0.212794	0.12076	0.650391	0	0.401862	0.281763	0.182574
460	chr2:153015-160785	0.113975	0.0565551	0	0.0792967	0.649604	0.690858	0.752406	0.691258	0	0.279152	0.330361	0.388161	0	0.306796	0.171082	0.412808	0	0.122601	0	0	0.14799	0.0586929	0.212417	0.147326	0	0.0586793	0	0	0	0.058698	0.0571176	0.074588	0.0289348	0.1208	0.416441	0.254545	0.0532238	0.0559374	0.0498083	0	0.07545	0	0.229647	0	0.7646	0.636846	0.750154	0
2681	chr7:155240046-155242738	0.164444	0.815986	0.312524	0.11441	0	0.142397	0	0	0	0.161106	0.317766	0	0	0.2951	0.16456	0.458158	0	0	0.157826	0.451889	0	0.169366	0	0.637692	0	1.35461	0.535075	1.19401	0.316307	0.846904	0.494461	0.215233	0	0	0	0.0918155	0	0	0.143728	0	0	0	0	0	0	0.18377	0	0.250471
938	chr3:46001399-46007906	0.20414	0.202592	0.258644	0.142029	0.211547	0.589238	0.207329	0.0917122	0	0.266662	0.197237	0.154497	0	0.183168	0.136189	0.227502	0	0.146394	0.195925	0.233739	0.0706841	0.280333	0.06341	0.527752	0	0.140134	0.442826	0.247039	0	0.0700895	0.0682024	0.222658	0	0.144243	0.221004	0.113979	0.317764	0.267172	0.65422	0.174213	0.270277	0.5436	0.205661	0.0820484	0.304328	0.152088	0.511849	0.621867
4167	chr14:61114583-61121488	0.256501	0.190917	0.182804	0.133843	0.265807	0.444223	0.39076	0.25928	0	0.251294	0.18587	0.21839	0	0.230149	0.19251	0.285854	0	0.0689786	0.492356	0.264322	0	0.330222	0.239022	0.124334	0	0.198087	0.208653	0.186242	0	0.198151	0.257087	0.125896	0.0651179	0.407791	0.416534	0.322232	0.299451	0.251775	0.336282	0.410433	0.297151	0.341515	0.193808	0.347939	0.143395	0.214984	0.301469	0.146507
4174	chr14:69809152-69819704	0.29375	0.124938	0.358886	0.291962	0.304407	0.218028	0.554055	0.339352	0.0120837	0.452236	0.202726	0.45257	0	0.112959	0.377943	0.21045	0.0185648	0.451404	0.201377	0.259463	0.0871813	0.12966	0.195524	0.244097	0	0.345681	0.18206	0.304697	0	0.129672	0.462662	0.357012	0.0426139	0.177909	0.204439	0.187442	0.0783857	0.205955	0.146711	0.241733	0.333358	0.111745	0	0.278294	0.0938392	0.23448	0.236742	0.319586
704	chr2:148253645-148259882	0.283968	0.211361	0.269839	0.148176	0.441407	0.0614742	0.0721008	0.239205	0	0.0695509	0.205774	0.0805921	0	0.318493	0.284167	0.158233	0	0.229096	0.13627	0.146313	0.0368718	0.21935	0	0.275297	0	0.219299	0.153998	0.567011	0.0341381	0.21937	0.142309	0.464591	0	0.0752433	0.115285	0.15855	0.663036	0.34842	0.310244	0.272631	0.281976	0.315072	0.500645	0.641998	0.0793752	0.238006	0.0667504	0.270326
3902	chr12:111816238-111825646	0.423598	0.186838	0.268348	0.360206	0.0487741	0.122269	0.334611	0.222024	0.0271058	0.0922221	0.272849	0.213724	0	0.253386	0.376796	0.445848	0	0.253144	0.225862	0.258675	0.073336	0.339326	0.263156	0.608391	0.0199925	0.145392	0.0510489	0.205046	0.135798	0.0969588	0	0.0308015	0.191181	0.29931	0.382159	0.315348	0.351665	0.0461993	0.164549	0.180749	0.280418	0.125332	0.237085	0.283755	0.420995	0.210391	0.619561	0.215066
1476	chr4:78713534-78719721	0.50096	1.20739	0.13601	0.44812	0.222487	0.68168	0.145367	0.144682	0	0.140226	0.0691455	0.24373	0	0.0642132	0	0	0.0316604	0.384911	0	0.0983304	0.148679	0.221123	0.333446	0.231268	0	0.368452	0.310484	0.207852	0	0.442284	0.143459	0	0.10901	0.303405	0.232433	0.0799157	0.200518	0.140494	0.18765	0.183222	0.236879	0.19057	0	0.0862914	0.480099	0.399881	0.538318	0.163506
3548	chr11:75039916-75047153	0.367103	0.182159	0.232558	0.127704	0.380422	0.529809	0.434976	0.206156	0	0.119884	0.532033	0.27783	0	0.27449	0.36736	0.102278	0	0.526517	0.293608	0.210165	0	0.315075	0.114029	0.158175	0	0.189001	0.265443	0.177699	0.0294216	0.126041	0.183971	0.280282	0	0.389086	0.298071	0.341612	0	0.18017	0.106952	0.195803	0.40503	0.543083	0.123279	0.405753	0.273635	0.205123	0.172585	0.32617
4292	chr15:76262994-76269672	0.132609	0	0.756067	0.0461307	0.13742	0.229661	0.202021	0.357457	0	0.0649586	0.256249	0.263448	0	0.297463	0.398107	0.258624	0	0.142646	0.254545	0.273305	0.0688744	0.273156	0.247146	0.25712	0	0.20482	0	0.0962858	0.031884	0.204885	0.132912	0.216957	0.0336656	0	0.269182	0.148082	0.495406	0.325415	0.231807	0.297068	0.395036	0.176561	0.534387	0.399739	0.148268	0.370485	0.062343	0.0504955
3200	chr10:18570092-18577466	0.120095	0.178776	0.0570596	0.125332	0.124452	0.207987	0.304925	0.242792	1.00286	0.0588283	0.0580166	0.238585	0.554304	0.215513	0.0600894	0.167298	0.982892	0.32296	0.230523	0.165008	0.467809	0.0618444	0.0559556	0.310473	1.04576	0.24732	0.260512	0.261597	0.548626	0	0.240738	0.117889	1.15856	0.254572	0.146267	0.134107	0	0.235764	0.104966	0.153733	0.119252	0.213198	0.181483	0.217209	0.0671379	0.469729	0.395217	0.0914601
1067	chr3:113024462-113033408	0.494969	0.196486	0.329239	0.103311	0.205171	0.171443	0.854589	0.36691	0	0.339445	0.143469	0.140475	0	0.0888234	0.495316	0.220645	0	0.319459	0.332534	0.136016	0	0.152935	0.184496	0.255923	0	0.458698	0.161055	0.035939	0	0.509827	0.19844	0.291528	0.0502632	0.262305	0.241136	0.221088	0.323596	0.388679	0.129784	0.411846	0.393197	0.175739	0.349058	0.208886	0.110683	0.276569	0.186158	0.263867
5970	chr1:93829913-93838086	0.0541777	0.215067	0.102964	0.263855	0	0.609883	0.495215	0.0730197	0	0.159234	0.314073	0.215264	0.0142892	0.486116	0.433726	0.150944	0	0.233113	0.259987	0.372198	0	0	0.353402	0.245109	0	0.223145	0.293809	0.196689	0	0.223216	0.217206	0.106366	0.0275082	0.344532	0.13197	0.0907484	0.303598	0.425436	0.331468	0.312088	0.28692	0.096179	0.327487	0.293965	0.121151	0.302724	0.203763	0.16504
3380	chr11:3473020-3482099	0.292631	0.48402	0.370761	0.27146	0.0505414	0.211165	0.198134	0.164335	0.0280879	0.955636	0.706838	0.719772	0	0.0437612	0.0488061	0.0543533	0	0.15739	0.187236	0.067012	0	0	0.0454485	0.0315217	0.0207169	0.20088	0.105797	0.14165	0	0.150708	0.14665	0.0957527	0.0990539	0.310155	0.237603	0.190618	0.546611	0.335113	0.341022	0.405813	0.710302	0.606076	0.147405	0.411652	0.327187	0.0545037	0.183431	0.260002
748	chr2:172512573-172519738	0.0617986	0.18399	0.0587237	0.171983	0	0.481619	0.50211	0.166582	0	0.423808	0	0.105233	0	0.0554496	0.371051	0.241048	0	0.132952	0.415181	0.212276	0.0641937	0.0636481	0.115175	0.119823	0	0.254533	0.26811	0.179485	0	0.445576	0.12388	0.283098	0	0.130999	0.301066	0.172522	0.404021	0.36396	0.756188	0.316433	0.61365	0.164562	0.186776	0.633373	0.276384	0.138123	0.116212	0.141191
5469	chrX:72220511-72230614	0.175316	0.217483	0.458131	0.182962	0.181677	0.303623	0.222568	0.177216	0.0126207	0.214696	0.211734	0.298535	0	0.353935	0.307018	0.122112	0	0.707195	0.168261	0.0903309	0	0.225704	0.285897	0.39658	0	0.180521	0.427837	0.286413	0	0.270868	0.219646	0.143414	0.0445076	0.139361	0.320285	0.195771	0.409345	0.215108	0.191538	0.112211	0.232115	0.31123	0.176622	0.184966	0.392037	0.14694	0.164841	0.100136
2766	chr8:38081999-38091940	0.267259	0.132616	0.169308	0.123962	0.323115	0.115714	0.452389	0.210121	0	0.218195	0.0860737	0.202266	0	0.279769	0.356596	0.148922	0	0.239573	0.213753	0.33661	0	0.458763	0.083016	0.287887	0	0.183463	0.0483121	0.258738	0	0	0.223225	0.174901	0.0452328	0.0944212	0.361671	0.223831	0.083203	0.306058	0.194659	0.256589	0.0884614	0.237226	0.134625	0.402815	0.348622	0.149334	0.670109	0.203536
530	chr2:48384541-48390655	0.3621	0.0718708	0.344084	0.151156	0.30019	0.125421	0.294204	0.0976064	0	0.21285	0.069971	0.328853	0.0191005	0.324899	0.217412	0.201769	0	0.155803	0.139011	0.248761	0.0376134	0.29835	0.202456	0.280835	0	0	0.0785476	0.15775	0	0.447564	0.145171	0.284361	0	0.0767568	0.294009	0.202174	0.270549	0.355429	0.632969	0.231762	0.671178	0.257127	0.218878	0.480268	0.404859	0.161862	0.068093	0.275764
4787	chr19:56494762-56501703	0.127585	0.379853	0.363712	0.57698	0.859393	0.22096	0.388734	0.773807	0.0183692	0.0624976	0.123271	0.217257	0.0336502	0.343433	0.0638374	0.213279	0.253994	0.205863	0.367352	0.306776	0.231928	0.0657019	0.118891	0.164919	0.0270973	0.0656866	0.0691902	0.324233	0.214733	0.262831	0.383631	0.0834951	0.388682	0.338064	0.466171	0.0712357	0.178739	0	0.111513	0.0816609	0.12669	0.113248	0.0642677	0.269216	0.285302	0.427738	0.119962	0.242912
4682	chr19:23816379-23824266	0.336852	0.334298	0.106697	0.312482	0.523611	0.340306	0.342113	0.227002	0	0.440019	0.488191	0.159335	0	0.251871	0.168544	0.250268	0	0.181174	0.161648	0.154277	0	0.289112	0.209266	0.217711	0	0.115618	0.121785	0.163056	0	0.173482	0.0562704	0.293927	0	0.178512	0.273509	0.188077	0.262172	0.0551077	0.196278	0.503072	0.0743309	0.199332	0.0565602	0.270776	0.0627716	0.18822	0.0527876	0.21378
3320	chr10:90294974-90300740	0	0.152415	0	0	0.318305	0.265979	0.0779894	0.310489	0	0.300925	0.148386	0.435871	0	0.482306	0.153688	0.256734	0	0.0826021	0.1474	0.105509	0.0398831	0.790883	0.214673	0	0	0.07907	0.0832874	0.111513	0.29541	0.0790953	0.307863	0	0.0779789	0.813885	0.810552	0.171499	0.215156	0.301501	0.268466	0.0491495	0.152503	0.0681608	0.154724	0.0925908	0	0.514888	0.288808	0
2756	chr8:30146006-30151857	0.151349	0.0751008	0.215728	0.15795	0.235261	0.327645	0.0768566	0.356976	0	0.0741385	0.146231	0.128862	0.139713	0.1358	0.151456	0.16867	0	0	0.290517	0.207952	0.0393038	0.155879	0	0.0978187	0	0	0	0.164839	0	0.311786	0.303391	0.346665	0.0384231	0.481238	0.307223	0.126756	0.212031	0.222841	0.462991	0.290614	0.350671	0.403025	0.0762383	0.182492	0.253832	0.253705	0.355766	0.288157
572	chr2:73627645-73640017	0.0715831	0.21312	0.340107	0.224114	0.333811	0.278937	0.145402	0.265315	0	0.14026	0.31123	0.264105	0	0.160572	0.179083	0.239325	0	0.346504	0.274809	0.34424	0	0.184314	0.200116	0.0925297	0	0.479104	0.232919	0.285865	0	0.147464	0.21524	0.421612	0.0181728	0.189674	0.232489	0.139886	0.200567	0.351321	0.344109	0.435259	0.284323	0.254156	0.252406	0.323671	0.560252	0.119994	0.235571	0.0545154
3678	chr12:1711131-1715463	0.102204	0	0.0971184	0.142214	0	0.177002	0.2076	0.0688741	0	0.400516	0.296242	0.0580122	0.242603	0.183407	0.102275	0.1139	0	0.219878	0	0.140427	0.0530824	0.105262	0.0952394	0.330276	0	0.315714	0.110851	0.148418	0	0.315815	0.204875	0.200654	0	0.216648	0.248954	0.171193	0.381816	0.300962	0.357314	0.261662	0.405946	0.63503	0.20593	1.23234	0.45709	0	0.0960971	0.700516
3715	chr12:14214885-14222902	0.165695	0.219252	0.157451	0.230562	0.286178	0.334788	0.0560944	0.148881	0	0.378774	0.106728	0.376204	0.0145672	0.0991149	0.110541	0.123105	0	0.297061	0.424072	0.151776	0	0.284424	0.257341	0.178484	0	0.113743	0.299525	0.0802062	0.106238	0.170669	0.27679	0.0722903	0.168261	0.117078	0.269075	0.30838	0.206337	0.325285	0.193096	0.282809	0.109689	0.0980502	0.166929	0.133193	0.185262	0.123446	0.103864	0.252377
3898	chr12:105309247-105313375	0.214506	0.21288	0.101917	0.0746203	0.444578	0	0.435713	0.144554	0	0.105076	0.103626	0.121757	0	0	0.107328	0.119527	0	0.346113	0.411748	0.294729	0	0.662779	0.599669	0.277275	0	0	0.348984	0.15575	0	0.331419	0.322495	0.0701893	0	0	0.17417	0	0.10017	0	0.281226	0.343237	0.0710005	0.285602	0.216104	0	0.119918	0.119858	0	0.408403
4488	chr17:77167827-77175201	0.120095	0.238367	0.399417	0.167109	0.0622259	0.0519967	0.12197	0.0809306	0	0.235313	0	0.204502	0	0.538782	0.420626	0.167298	0	0.129184	0.115261	0.247513	0	0.247378	0.111911	0.155237	0	0.43281	0.065128	0.0435995	0	0.0618498	0.120369	0.314372	0.0304884	0.318215	0.0487557	0.134107	0.168245	1.06094	0.314897	0.230599	0.198753	0.0532994	0.0604944	0.470619	0.134276	0.201313	0.338757	0.320111
3892	chr12:103222089-103229120	0	0	0.119685	0.043815	0	0.109066	0.12792	0.127317	0	0.431884	0.0608465	0.178731	0.0996586	0.282531	0	0.175458	0	0.203228	0.181325	0.0432643	0	0.454027	0.176055	0.0814043	0	0.0648459	0	0.0914524	0	0.454067	0.12624	0.783052	0.0319756	0.333737	0.255669	0.210972	0.294086	0.432711	0.440342	0.483695	0.333516	0.279496	0.571007	0.68341	0.0704127	0.281509	0.0592134	0.335725
3602	chr11:95019208-95024720	0.562296	0.318875	0	0.22355	0.33297	0.139117	0.163165	0.324794	0	0.157395	0.155223	0.0455953	0.0211863	0.0720754	0.401922	0.134281	0	0.259223	0.154191	0	0	0.0827322	0.299418	0.0519168	0	0.165426	0.0871247	0.291626	0	0.165479	0.161023	0	0	0.170277	0.326114	0.0448502	0.225069	0.39424	0.631878	0.0514139	0.265882	0.285205	0	0.0968567	0	0.269305	0.5287	0
3537	chr11:70209638-70220000	0.427336	0.212048	0.203037	0.148657	0.22142	0.296035	0.303807	0.403169	0	0.125598	0.454173	0.363843	0.0676251	0.11503	0.342109	0.142872	0.0189052	0.367744	0.328111	0.0880732	0.0443899	0.220063	0.278752	0.193334	0	0.0440024	0.0926988	0.155142	0.205494	0.176066	0.471145	0.111864	0.195278	0.135878	0.173489	0.190878	0.199557	0.125839	0.112051	0.109407	0.169735	0.189657	0.0861037	0.0515267	0.477798	0.0477558	0.281262	0.227812
4589	chr18:80023869-80033162	0.238244	0.472875	0.407502	0.198907	0.148133	0.288824	0.241965	0.288991	0	0.28009	0.230187	0.135231	0	0.299275	0.0476823	0.212407	0.0210797	0.410042	0.36585	0.229141	0.0247478	0.0981499	0.266412	0.0615919	0	0.294381	0.206722	0.242181	0.022913	0.147238	0.0955156	0	0.0241933	0.202009	0.193444	0.159625	0.0890041	0.420939	0.0832925	0.121991	0.189258	0.253766	0.432033	0.229813	0.106551	0.479238	0.268811	0.0362879
1342	chr4:23722377-23727827	0	0.0806256	0	0	0.673514	0.914545	0.495063	0.164244	0	0.477555	0.784943	0.553366	0.107136	0.218685	0.487792	0.362156	0	0	0	0.167438	0	0.0836732	0.0757058	0	0	0	0.176231	0.117977	0	0	0.162855	0.691167	0	0.344427	0	0	0	0.0797449	0	0	0	0.0721122	0.0818467	0.244896	0.272505	0.635526	0.0763876	0.309355
4656	chr19:21430787-21441082	0.25807	0.213428	0.24523	0.2394	0.534867	0.0744902	0.174734	0.115941	0	0.252831	0.249343	0.170898	0	0.231557	0.387377	0.0719009	0	0.185069	0.165123	0.23639	0.0670181	0.265794	0.0801617	0.166793	0.0913507	0.0442887	0.186604	0.249842	0	0.0443029	0.12933	0.168888	0.0218388	0.18235	0.209542	0.0960603	0.321369	0.211096	0.150373	0.165178	0.427099	0.305426	0.259992	0.207448	0.240454	0.192266	0.283093	0.294807
6127	chr1:186512486-186523752	0.0393049	0.0390068	0.0746985	0	0.285117	0.204212	0.359269	0.317847	0.0113179	0.115521	0.227854	0.04462	0.0103665	0.0352668	0	0.109507	0	0.126839	0.264062	0.24302	0.102071	0.121444	0.256386	0.228628	0	0.161888	0.468936	0.285388	0.113404	0.161939	0.196974	0.334388	0.0399134	0.333269	0.446794	0.219454	0.330382	0.308646	0.206121	0.251571	0.494369	0.069776	0.158391	0.118481	0.35157	0.0878483	0.184783	0.2694
1841	chr5:50370090-50377918	0.169695	0.168408	0.0537507	0.118064	0.293087	0.0489815	0.40214	0.266831	0	0.110834	0.218609	0.256857	0	0.152261	0.396234	0.0945576	0.150145	0.121693	0.162866	0.1943	0	0.116516	0.0527107	0.292469	0	0.174734	0.0613512	0.287499	0	0.291316	0.283472	0.185089	0.0574409	0.419667	0.597069	0.284242	0.264147	0.055523	0.296636	0.253432	0.149782	0.200835	0.170959	0.545634	0.126489	0.126426	0.212742	0.0430782
1312	chr4:9658471-9667537	0	0.0969427	0.0464116	0.135925	0.303683	0.126881	0.198418	0.263312	0	0	0.0471901	0.166339	0.0257637	0.175296	0.195504	0.190509	0.0432148	0.577923	0.515638	0.436202	0.0253674	0	0.273082	0.189402	0	0.352043	0.211897	0.283707	0.0704599	0.100616	0.14686	0.159817	0.0495979	0.362366	0.515546	0.190892	0.0456162	0.143826	0.0426889	0.125045	0.0646655	0	0.147617	0.176675	0.436874	0.545818	0.321465	0.0743927
4785	chr19:55122249-55128004	0.230811	0.534474	0.219326	0.160584	0.0797282	0.133244	0.0781385	0.103694	0.110771	0.15075	0	0.174681	0.0202918	0.552261	0.153982	0.342966	0.0340365	0.24828	0.147681	0.158565	0	0.158479	0.143389	0.149175	0.163403	0.0792211	0.25034	0.39104	0	0.158493	0.308451	0.201398	0	0.244632	0	0.257741	0.215567	0.0755193	0.201734	0.14773	0.101863	0.273164	0.387549	0.231919	0.0860219	0.429893	0.28936	0.175778
837	chr2:231400877-231408679	0.0567536	0.0563232	0	0	0.117625	0.294868	0.11528	0.0382457	0.0163423	0.222406	0.109669	0.128856	0	0.152769	0.0567934	0.126497	0.150645	0.244197	0.217879	0.701809	0.0884299	0.467617	0.158659	0.220083	0.072322	0.350632	0.0615556	0.453289	0.0545824	0.467659	0.0568834	0.854244	0.0288161	0.360913	0	0.126751	0.0530055	0.111416	0.198416	0.108975	0	0.151128	0.171529	0.0684315	0	0	0	0
1286	chr4:3046337-3056570	0.302906	0.429441	0.246715	0.150531	0.582949	0.299766	0.219741	0.437412	0	0.0423938	0.334471	0.0491238	0.0114129	0.0776532	0	0.0241122	0	0.605117	0.249185	0.208095	0.0674241	0.490241	0.685502	0.279673	0	0.222785	0.234668	0.188517	0	0.0445713	0.34697	0.254867	0	0.183454	0.316216	0.0483211	0.0404145	0.08495	0.0756421	0.0276964	0.257812	0.0768191	0.0871891	0.0260881	0.193528	0.290147	0.162747	0.0988644
3914	chr12:127153668-127156488	0.313966	0.623169	0.298344	0	0.162678	0	0	0	0	0.153796	0	0.0891055	0	0.422565	0.314186	0.0874739	0	0	0	0	0	0.161681	0	0	0	0.161644	0	0	0	0	0	0	0	0	0.127463	0	0.146615	0.15409	0	0	0	0	0	0	0	0.175432	0	0
3145	chr9:112391941-112399397	0.059387	0.0589366	0.225728	0.123954	0.246166	0.565674	0.241258	0.360183	0	0.40727	0.516408	0.134835	0	0.479571	0.297143	0.132366	0	0.127764	0.227988	0.163194	0	0.122329	0.276701	0.15353	0	0.18345	0.193235	0.301841	0	0.122339	0	0.155457	0.0301532	0	0.144659	0.232106	0.44372	0.0582928	0.311434	0.228064	0.471762	0.31628	0.119658	0.53705	0.199199	0.265465	0.279193	0.0904544
1960	chr5:118948084-118952819	0.0935069	0	0.266563	0.260226	0	0.161941	0	0.126027	0	0.549652	0.0903447	0.424606	0	0.1678	0.280717	0.312623	0	0	0.179488	0.192716	0	0.192611	0.17427	0.181303	0	0.0962831	0.101419	0.0678941	0.0899296	0.288942	0	0.36716	0.0474772	0.198213	0.151847	0.208834	0.174663	0.45892	0.572091	0.478792	0.371403	0.663992	0.188406	0.450989	0	0	0.17584	0.0712118
4481	chr17:74583315-74595968	0.10499	0.243119	0.199533	0.0973944	0.108799	0.0606094	0.0710866	0	0	0.27429	0.10144	0.139052	0	0.219809	0.28017	0.331515	0	0.112937	0.167942	0.360638	0	0.216265	0.16306	0.226187	0.0445968	0.360358	0.151831	0.254107	0	0.288378	0	0.274833	0.0177693	0.408017	0.0284158	0.25402	0.163427	0.343519	0.122352	0.111998	0.162172	0.217448	0.246801	0.295385	0.234776	0.195548	0.131623	0.186567
552	chr2:63322227-63329541	0.12108	0	0.115055	0.0842398	0.250945	0.209693	0.0614853	0.0815944	0	0.118622	0.116985	0.171816	0	0.16296	0.363493	0.202404	0	0.0651219	0.116207	0.332724	0	0.0623517	0.225658	0.0391275	0	0.187012	0.196986	0.131871	0	0.124714	0.121356	0.396188	0	0.0641651	0	0.270413	0.452333	0.415971	0.211653	0.154994	0.12023	0.214946	0.304953	0.291987	0.203066	0.202964	0.170768	0.0922103
3367	chr10:119883735-119890745	0.315824	0.376115	0.540198	0.263678	0.130913	0.382874	0.128303	0.212831	0	0.185648	0.305144	0.215119	0	0.170026	0.379255	0.175983	0	0.135891	0.0606228	0	0	0	0.294303	0.20412	0	0.195121	0.137019	0.137589	0	0.195183	0.506474	0.12401	0	0.200842	0.564157	0.211604	0.0589933	0.186003	0.0552076	0.121286	0.167258	0.1682	0.0636352	0.152324	0.0706236	0.141176	0.296954	0.0962086
649	chr2:112039985-112042413	0.182317	0.542804	0.173246	0.380536	0.188932	0	0	0.245724	0	0.357232	0.176152	0	0	0.327173	0.182445	0	0	0	0.34996	0	0	0.375547	0.169894	0.471334	0	0.37546	0	0	0.438356	0	0.365468	0.477253	0.740559	0.193235	0.148033	0.203589	0	0	0.15935	0.116692	0	0	0	0.109916	0	0.407487	0	0
3382	chr11:3509346-3516789	0.416435	0.649434	0.395715	0.28973	0.0616491	0.309088	0.362519	0.120271	0	0.349698	0.574788	0.337677	0	0.0533788	0.178597	0.0662987	0	0.38396	0.17129	0.0817395	0	0.122542	0.277185	0.115348	0.10108	0.0612569	0.0645243	0.129586	0.0286074	0.245106	0.238507	0.194661	0.0604117	0.0630532	0.193215	0.199295	0.277809	0.0583946	0.207985	0.266539	0.275675	0.105611	0.239735	0.143463	0.266062	0.0664822	0.167809	0.0453062
4176	chr14:70293538-70301890	0.212067	0.210458	0.151136	0.0368858	0.164821	0.137726	0.0538447	0.14291	0	0.415524	0.512238	0.240744	0.013983	0.14271	0	0.14771	0	0.114059	0.101766	0.0728443	0.0550715	0.273017	0.148212	0.308387	0	0.163772	0.115005	0	0	0.109216	0.159414	0.069391	0.0807562	0.73049	0.645708	0.266411	0.247577	0.312239	0.185352	0.237533	0.0350965	0.141177	0	0.0958885	0.118554	0.23699	0.0996981	0.0403758
6091	chr1:167317844-167323390	0.159671	0.237691	0.22759	0.11109	0.661858	0.138264	0.405413	0.322803	0.0229889	0.078215	0.231407	0.135947	0	0.214901	0.159783	0.088972	0	0.171756	0.536359	0.16454	0	0.16445	0.297582	0.154796	0	0.575442	0	0.231871	0.153563	0.246697	0.480109	0.104493	0	0.0846165	0.194469	0.312027	0.22369	0.235094	0.348892	0.153296	0.158551	0.212592	0.16086	0.240658	0.357052	0.0892182	0.0750656	0.243201
1719	chr4:176344477-176348812	0.204266	0.202717	0.0970512	0.35529	0.317515	0	0.103728	0.412959	0	0.300179	0.296037	0	0	0.0916401	0.306614	0.0569105	0	0.109863	0.294068	0.0701647	0	0	0.190347	0.0660095	0	0	0.443098	0.148315	0	0.105199	0	0	0	0.108249	0.497564	0.171074	0.572328	0.200502	0.357067	0.0653702	0.135222	0.271967	0	0.184722	0	0	0.480153	0.466687
2073	chr6:11103051-11112191	0.193786	0.192316	0.23018	0.16853	0.100408	0.125854	0.442827	0.326476	0	0.142389	0.187232	0.164993	0	0.0434692	0.0969607	0.188967	0	0.260566	0.0929934	0.13313	0	0.349274	0.0902904	0.0626228	0	0.0498848	0.367819	0.0703526	0	0.249504	0.0485572	0.0634092	0	0.154043	0.314691	0.162297	0.316728	0.332877	0.12703	0.310081	0.64142	0.172009	0.195229	0.408905	0.108334	0.10828	0.227759	0.221371
2653	chr7:141575647-141584446	0.100647	0.199768	0.0956396	0.105037	0.104299	0.0435768	0.153329	0.135651	0	0.246511	0.0486219	0.171386	0	0.361229	0.352513	0.112165	0	0.378928	0.386388	0.449437	0.0261371	0.10366	0.0468946	0.260198	0.10688	0.310907	0.32749	0.0730788	0.0241992	0.155503	0.100878	0.197599	0.0766542	0.320023	0.326885	0.309074	0.141001	0.246983	0.131952	0.289887	0.199882	0.178674	0.0506985	0.212375	0.112532	0.224952	0.0473169	0.0766498
4327	chr15:100440303-100446215	0.224682	0.148652	0.284671	0.104213	0.0776113	0.129706	0.0760638	0	0	0.293495	0.289445	0.212554	0	0	0.149893	0.0417324	0	0.0805625	0.07188	0	0	0.539949	0.209372	0.242024	0	0.0771176	0.081231	0.108759	0.0360144	0.308569	0.225196	0.147038	0.0380268	0.238137	0.182432	0.125449	0.34974	0	0.196378	0.0958718	0.297474	0.465345	0.377259	0.58698	0.0837379	0.167392	0.0704192	0
3703	chr12:10333016-10338658	0.235433	0.0778823	0.0745728	0.0545999	0.16265	0.135912	0.398516	0	0	0.307538	0	0.133635	0	0.0704149	0.157065	0.262375	0	0.337669	0.0753193	0.0539136	0	0.323305	0.29252	0.202883	0	0.32323	0.255353	0.170944	0	0.323333	0.471942	0.462219	0.0398462	0.249531	0.12744	0.262902	0	0	0.0685912	0.100459	0.103903	0.208976	0.0790619	0.0946254	0.0877445	0.175401	0.147577	0.29883
2307	chr6:118617102-118626810	0.0912243	0.316864	0.303399	0.60295	0.141801	0.0394969	0.370596	0.307376	0	0.0893725	0.132209	0.207121	0	0.613892	0.273865	0.228744	0.0403573	0.0981288	0.218883	0.188012	0.11845	0.140932	0.170016	0.147398	0	0.0939328	0.098943	0.331184	0	0.140944	0.137149	0.149249	0.208432	0.0483436	0.0740701	0.152802	0.1278	0.179087	0.159465	0.262746	0.211363	0.080973	0	0.494978	0.152995	0.152918	0.171548	0.173684
906	chr3:32067467-32076504	0.097997	0.194508	0.139682	0.102271	0.304657	0.59401	0.0995276	0.297177	0	0.288023	0.284049	0.194685	0	0.131894	0.196131	0.109212	0	0.685192	0.235133	0.336617	0	0.30279	0.0913194	0.0316682	0	0	0	0.106732	0	0	0.196442	0.128264	0.0995142	0.519327	0.318277	0.383008	0.137288	0.0480957	0.214129	0.313615	0.162182	0.260954	0.197454	0.265863	0.164353	0.054757	0.276426	0.0373157
747	chr2:170973733-170983386	0.22936	0.318669	0.261538	0.12766	0.142609	0.317776	0.186354	0.216389	0	0.0898816	0.487528	0.208301	0	0.288115	0.137713	0.178926	0	0.345408	0.132078	0.157569	0.0476499	0.236225	0.0427463	0.177885	0	0.141702	0.199013	0.23315	0.0220586	0.188996	0.183908	0.120079	0	0.194476	0.111738	0.204897	0.0428426	0.180107	0.320746	0	0.121467	0.407172	0	0.248899	0.153866	0.205052	0.0862625	0.139739
4068	chr14:20715361-20726308	0.0404502	0.401434	0.3075	0.281428	0.37726	0.280216	0.246492	0.27259	0	0.237774	0.234493	0.321441	0	0.0725889	0.202393	0.112698	0.196845	0.217559	0.155289	0.194523	0.0630269	0.166643	0.113082	0.23529	0.0343642	0.124953	0.131618	0.117481	0.0194514	0	0.0810853	0.31766	0	0.0428725	0.164219	0.158094	0.113336	0.317639	0.0707089	0.258901	0.133888	0.143618	0.0815028	0.634054	0.226134	0.180816	0.2282	0.123222
1831	chr5:44788562-44794266	0.0776246	0.0770359	0.0737624	0.108013	0.080441	0.201652	0.473022	0.104621	0	0.228147	0.0749996	0.264365	0	0.139299	0.388395	0.0865079	0	0.250499	0.298003	0.106655	0	0.0799478	0.14467	0.0501696	0	0.159859	0.252578	0	0	0.399774	0.389011	0.406397	0	0.329092	0.504222	0.0866815	0.0724982	0.152389	0.271383	0.0496836	0.0513867	0.275606	0.0782027	0.093597	0.173582	0.173495	0.291947	0.118233
3710	chr12:11462168-11468020	0.0756618	0.150176	0.0718972	0.105282	0.156814	0.131036	0.0768435	0.0509878	0	0.148252	0.0731031	0.12884	0	0.271554	0.378574	0.210801	0	0	0.217851	0.259896	0.0785942	0.779263	0.352531	0.048901	0	0.233725	0.410318	0.0549371	0.0363836	0.233799	0.227504	0.29709	0	0.0801927	0.061434	0.0422449	0.494655	0.371339	0.264521	0.193709	0.350611	0.402956	0.152451	0.182461	0.338385	0.338215	0.355706	0.115243
674	chr2:127616425-127618909	0	0.353714	0.169342	0.123987	0.369349	0.154316	0.180992	0.36028	0	0	0.516546	0	0	0	0.891668	0.297904	0.473033	0.191697	0	0	0	0.183542	0.332131	0.115178	0	0.1835	0.966436	0.51758	0	0.183558	0	0	0	0	0	0.497503	0.332879	0.699701	0	0	0	0.158182	0	0.107439	0	0	0	0
3711	chr12:11606754-11615133	0.105692	0.10489	0.100433	0.0735339	0.0547632	0	0	0.0356124	0	0.103546	0.153176	0.14998	0.0139379	0.2845	0.370181	0.382808	0	0.227383	0.557911	0.290438	0	0.0544275	0.19698	0.136619	0	0.10883	0	0.153483	0.228709	0.163297	0.423734	0.415005	0	0.168031	0.128726	0.206541	0.246779	0.103744	0.138566	0.16912	0.139934	0.0938146	0.266197	0.159299	0.236345	0.826791	0.397507	0.241474
4224	chr14:102234173-102245769	0	0.151587	0.217719	0.0797035	0	0	0	0.0257335	0	0.149645	0.14758	0.108376	0	0.0685266	0.267493	0.148948	0	0.164307	0.183248	0.157403	0.0396665	0.235976	0.142338	0.148082	0.032441	0.275242	0.207087	0.138634	0	0.471994	0.153095	0.674736	0.0581665	0.445205	0.124023	0.191889	0.0713292	0.112449	0.300383	0.293295	0.176953	0.0338953	0.346238	0.391373	0.0853914	0.128023	0.179524	0.203571
2340	chr6:131401453-131414194	0.312795	0.24144	0.23118	0.217624	0.216096	0.270859	0.423574	0.281053	0	0.136198	0.0671594	0.0986371	0.0458326	0.0623688	0.173897	0.174296	0.0153755	0.261699	0.200138	0.214888	0	0.107386	0.0323868	0.0224625	0	0.214721	0.188479	0.328057	0.0501381	0.178992	0.0348345	0.409403	0.0705862	0.184181	0.225756	0.291076	0.129839	0.477606	0.212637	0.200204	0.322104	0.401043	0.280111	0.356204	0.155436	0.155358	0.130714	0.105873
4351	chr16:20645362-20660154	0.0898091	0.267384	0.170681	0.0833116	0.0310225	0.129614	0.15202	0.0403477	0	0.175972	0.14462	0.135938	0.00789562	0.161165	0.209701	0.200174	0	0.225415	0.114926	0.205661	0	0.246659	0.223172	0.0580445	0	0.184951	0.162347	0.217364	0	0.215845	0.0900144	0.235094	0	0.158645	0.048614	0.150431	0.167756	0.235078	0.156991	0.191608	0.297263	0.186006	0.211115	0.415106	0.100414	0.234182	0.112591	0.0227986
930	chr3:40560871-40570272	0.0942031	0.373954	0.0895159	0.0327704	0.0488104	0.24472	0.143512	0.0317413	0	0.230727	0.0455087	0.213884	0	0.0845249	0.235673	0.0787377	0	0.303999	0.22603	0.161792	0	0.436601	0.131676	0.182653	0	0.291	0.255434	0.102599	0.0226498	0.194062	0.0944185	0.339069	0	0.149766	0.152977	0.315583	0.0439909	0.0462337	0.247007	0.211031	0.124723	0.250851	0.142357	0.113587	0.105327	0.263185	0.0442873	0.215226
3430	chr11:27629075-27634939	0.075507	0.0749343	0.1435	0.0525332	0.0782465	0.326919	0.153373	0.0508835	0	0.147948	0.0729535	0.0428588	0.0199147	0.406498	0.30224	0.168296	0	0.324888	0	0.207491	0.0392167	0.155534	0.0703619	0.0488009	0	0.310995	0.327583	0.109649	0	0.233321	0.0756797	0.197655	0	0.480172	0.122617	0.25295	0.141041	0.444695	0.26398	0.0966565	0.249924	0	0.380347	0.455218	0.168846	0.253142	0	0.172511
2640	chr7:136263317-136264435	0.395754	0	0.376063	0.275342	0	0.342695	0.401935	0	0	0.38772	0.38237	0.44927	0	0	0	0.220522	0	0	0	0	0	0	0	0	0	0	0	0	0	0.407634	0.396659	0	0	0	0.321334	0	0.369618	0	0.345898	0.506604	0	0	0.398701	0.477186	0	0	0	0
915	chr3:34680866-34685086	0.314747	0.20824	0.199391	0	0.217444	0.363398	0.426217	0.212105	0	0.616714	0.304103	0.119103	0	0.188274	0.104989	0.175383	0	0.112856	0.100693	0.0720764	0	0.216111	0.488832	0.203424	0	0	0	0.228533	0	0.21613	0.105155	0.137319	0.0532699	0.667189	0.25556	0.35147	0.29396	0.102983	0.458494	0.134302	0.277812	0	0.105697	0.0632517	0.586523	0.468982	0.295941	0.239701
926	chr3:38441201-38444753	0	0.123695	0	0	0.258326	0.10793	0.126587	0.167988	0	0.244221	0.120426	0.141495	0	0	0	0	0	0	0	0.0856274	0	0.128371	0.348443	0	0	0.128341	0.270374	0.0905	0.179809	0.128382	0	0.326273	0	0.264209	0	0.0695916	0.465637	0.489377	0.435756	0.398881	0.165022	0.331903	0.502276	0.375718	0.139359	0	0.117194	0.0949224
4052	chr13:100283433-100286288	0.155059	0	0.294688	0	0.160685	0	0	0.208986	0	0.151911	0.149815	0.264041	0	0.139129	0	0.0864019	0	0	0	0	0	0.319399	0	0.400865	0	0.319325	0.168179	0.450345	0.0745635	0.798569	0	0.101475	0	0.328689	0	0.173151	0	0.608808	0	0	0.102647	0.275268	0.312428	0.467412	0.173369	0.173282	0.145794	0.236176
4077	chr14:22236568-22244186	0.0581242	0.0576834	0.165697	0.242636	0.240932	0.402652	0.413224	0.274186	0	0.170833	0.224634	0.197952	0	0.156458	0.11633	0.129552	0	0.18757	0.11157	0.079862	0	0.119728	0	0.0375663	0	0.17955	0.252169	0.168813	0.139752	0.419084	0.116514	0.076076	0	0.0616049	0.235971	0.0973589	0.162857	0.17116	0.152406	0.0744048	0.269343	0.103185	0.117114	0.280337	0.194963	0.0649552	0.109303	0.132797
4489	chr17:80399794-80408186	0.211056	0.209455	0.451248	0.18355	0.0546784	0.0913799	0.321529	0.142229	0	0	0.203919	0	0.0139163	0.189373	0.316806	0.235209	0	0.170273	0.303844	0.108746	0	0.217373	0.0491686	0.204612	0	0.108661	0.515056	0.0383113	0.0507455	0.054348	0.211539	0.172651	0	0.223695	0.128526	0.206221	0.147838	0	0.184468	0.0675432	0.139717	0.281008	0.053157	0.190863	0.294973	0.23586	0.446503	0.0401834
5371	chrX:50330000-50338533	0.0518923	0.257494	0.147931	0.10831	0.268875	0.0898701	0.263514	0.0699394	0	0.152517	0.100275	0.0883642	0	0.139683	0.0519286	0.144577	0	0.279099	0.0996078	0.142599	0	0.0534453	0.38685	0.268308	0	0.106866	0.393981	0.22607	0	0.2138	0.208044	0.271677	0	0.274999	0.126403	0.144867	0.0484652	0.0509362	0.226775	0.132855	0.171761	0.0460609	0.209115	0.156425	0.17406	0.115982	0.292751	0.197597
1278	chr3:193599956-193613333	0	0.131407	0.157278	0.115154	0.205823	0.171988	0.0336198	0.111538	0.257364	0.227015	0.0959499	0.0751582	0.279384	0.207913	0.033126	0.147564	1.05441	0.142433	0.0635411	0.113707	0.275086	0.0681869	0.0925413	0.27813	0.112489	0.238599	0.143614	0.144213	0.302445	0.0681929	0.0663569	0.151643	0.268922	0.035085	0.13439	0.22179	0.0927498	0.389914	0.173596	0.338998	0.0876546	0.176297	0.100048	0.179614	0.148047	0.110979	0.1245	0.22689
3247	chr10:48990943-48997767	0.129772	0.128788	0.0616578	0.0451439	0	0.112374	0.263599	0.218631	0	0.254276	0.31346	0.220982	0	0.11644	0.129863	0.0723118	0	0.279189	0.12455	0.267459	0	0.0668282	0.12093	0	0	0.200438	0	0.329791	0	0.33417	0.260138	0.212316	0	0.137544	0.0526847	0.144914	0.424207	0.127381	0.340273	0.166122	0.300678	0.172784	0.326847	0.156475	0.145097	0.145024	0.244037	0.296492
3245	chr10:45571382-45577314	0.0746416	0	0.141855	0.0519311	0.0773497	0.0646344	0.0758074	0.0503003	0	0.0731264	0	0.127103	0.0196865	0.267892	0	0.166367	0.0330211	0.080291	0.286551	0	0.155069	0.461253	0.139111	0.144725	0	0.461146	0	0.379374	0	0.230647	0	0.146542	0.189493	0.158223	0.0606056	0.250051	0.0697121	0	0.195716	0.477743	0.24706	0.331269	0.0751975	0.360001	0.0834556	0.0834137	0	0.0568446
5346	chrX:37451928-37461065	0.339236	0.384758	0.414459	0.269737	0.200882	0.0839299	0.246096	0.0326583	0	0	0	0.220063	0	0.478318	0.824437	0.216033	0	0	0.093024	0.0665866	0.0503406	0.399302	0.72256	0.313217	0.123512	0.0998023	0	0.316691	0	0.0499171	0.0971462	0.06343	0	0.410915	0.236095	0.405875	0.135785	0.0951388	0.211786	0.0930549	0.160408	0.129049	0.14647	0.116868	0.162555	0.108315	0	0.147629
4308	chr15:88540526-88544253	0.593949	0.117889	0.225759	0.0826468	0.246199	0.102864	0.120645	0.240154	0	0	0.229545	0.20228	0	0.319757	0.356619	0.198576	0	0.255561	0.228019	0.163216	0	0.48938	0.221391	0.230325	0	0	0.128841	0.0862518	0	0.244712	0.119061	0.155478	0	0.251807	0.289356	0.265299	0.110945	0.116601	0.20765	0.0760314	0.235913	0.210882	0	0.214849	0	0.13275	0	0.0904666
3827	chr12:67766804-67772346	0.159787	0.0792874	0.303673	0.0555849	0.0827919	0.069182	0.0811411	0.269197	0	0.0782715	0.0771915	0.226742	0	0.143371	0	0.0890362	0	0	0.230034	0.164659	0.0414949	0.329138	0.0744493	0.154907	0	0.164531	0.25996	0.174028	0.115255	0.411458	0.160152	0.313706	0.0811302	0.254033	0.389219	0.17843	0.298468	0.0784213	0.0698287	0.255678	0	0.354576	0.241465	0.144499	0.178655	0	0	0.121688
5816	chr1:9086800-9096029	0	0.142846	0.182368	0.0333811	0.04972	0.0415467	0.0487286	0.0323328	0	0.141016	0.0927134	0	0	0.7749	0.480129	0.294085	0	0	0.0460484	0	0	0.0988304	0.17884	0	0	0.0988075	0.156117	0.174186	0	0.0494196	0.048089	0.0313989	0	0	0.038957	0.0535773	0.403296	0.518048	0.712896	0.522055	0.190571	0.596226	0.241683	0.34711	0	0.0536179	0.0451126	0.0365395
4800	chr20:468633-472902	0	0.308775	0	0.360781	0.107474	0.089807	0.105331	0.139781	0.029864	0.203212	0.100204	0.0588681	0.109414	0	0.103784	0.11558	0.0917632	0.223122	0.199076	0	0.269328	0.320447	0	0.268119	0.0881074	0.213582	0	0.225911	0.199488	0.106825	0	0.135743	0.36861	0.329767	0.0842092	0.231624	0.193725	0.407203	0.181293	0.0663806	0.205968	0.092057	0	0.0625259	0.231917	0.1159	0.292545	0.23695
2590	chr7:107383868-107391037	0	0.0612957	0.352146	0.0859434	0.064005	0.213933	0.188186	0.291356	0	0.0605103	0.238702	0.210349	0.0488702	0.332512	0.370844	0.309745	0.109297	0.132878	0	0.297021	0.0641579	0	0.172666	0.199594	0.0262356	0.127196	0.13398	0.134538	0.237605	0.0636182	0.0619053	0.16168	0.156801	0.0654627	0	0.413823	0.0576851	0.121252	0.16195	0.158128	0.0817743	0.0548233	0.124448	0.446838	0.0690575	0.207068	0.232295	0.329263
2718	chr8:8127799-8133981	0.286494	0.142161	0.20418	0.398651	0.148444	0.434147	0.436453	0.434398	0	0	0.0692014	0.081309	0	0.12853	0.286695	0.15964	0	0.154089	0.206223	0.049205	0	0.147534	0.400458	0.277746	0	0	0	0.0520049	0	0.0737736	0.143575	0.140617	0	0.151825	0.348931	0.399902	0.0668934	0.0703039	0.187802	0	0.0948281	0.12715	0.288628	0.0431806	0.160162	0	0.404065	0.327277
5840	chr1:20153946-20160366	0	0.136891	0.196612	0.191937	0.0714711	0.0597221	0.140092	0.0464774	0	0.0675687	0.0666364	0.15659	0.0181903	0.185649	0.276069	0.384308	0	0.148378	0.19858	0.142143	0	0.142066	0.642692	0.133726	0.14648	0.284066	0.224413	0.200309	0	0	0.0691265	0.0902699	0.21011	0.511692	0.335997	0.269555	0.064414	0.203094	0.241122	0.176574	0.0913132	0.0612184	0.416894	0.0831601	0	0	0.32424	0
1250	chr3:179055107-179062330	0.122605	0.24335	0	0.255903	0.19058	0.318501	0.435819	0.165244	0	0.180174	0.236917	0.034796	0	0.385031	0.184036	0.0683178	0	0.197827	0.176506	0.126343	0	0.189411	0.11425	0.237722	0	0.0631225	0.132979	0.178044	0	0.378856	0.307213	0.240707	0.0311257	0	0.0497748	0.13691	0.286269	0.180519	0.160739	0.156946	0.324652	0.163241	0.185277	0.184791	0.205624	0.0685068	0	0.0933719
4632	chr19:18577415-18587893	0	0.25164	0.321263	0.117609	0	0.0731894	0.214603	0.113916	0.012169	0.165611	0.28582	0.0959506	0	0.34127	0.211451	0.164839	0	0.136377	0.162239	0.31936	0.0658477	0.0870508	0.0393809	0.163881	0.0538532	0.0435153	0.229182	0.122739	0.0609658	0.174117	0.0423572	0.0829693	0.0643722	0.179165	0.240196	0.0471914	0.157878	0.20741	0.258557	0.189342	0.111904	0.412627	0.0425753	0.127391	0.141753	0.0944543	0.198678	0.0965529
2289	chr6:111130928-111141848	0.0405502	0.160971	0.0770651	0.112849	0.462235	0.140454	0.411835	0.245938	0.0350295	0.119181	0.117537	0.207151	0.010695	0.145537	0.0405786	0.180763	0.0717569	0.0872386	0.272428	0.139289	0.0421218	0.0417638	0.113361	0.026208	0	0.0417541	0.0439812	0.0883289	0	0.0835349	0.0406429	0.18576	0.0617669	0.171914	0.19755	0.0452814	0.113617	0.159212	0.283535	0.0519083	0.187906	0.143973	0.245113	0.366705	0.226693	0.0906315	0.305019	0.0308817
1679	chr4:163093170-163103788	0.12511	0.413871	0.198142	0.145074	0.0864329	0.108337	0	0.252932	0	0.12257	0.120879	0.213043	0	0.0374189	0.0417327	0.0464759	0	0.358879	0.1601	0.1719	0	0.429515	0.272032	0.296487	0	0	0.090464	0.0605606	0	0.214777	0.0835975	0.136459	0	0.530409	0.406336	0.0931384	0.0778985	0.491221	0.255149	0.133461	0.110429	0.222102	0.21007	0.125711	0.0932559	0.139814	0.156847	0.09528
4519	chr18:23283957-23288878	0.179947	0.267873	0.170993	0	0.279713	0.467463	0	0.181897	0	0.176294	0.347722	0.10214	0	0	0.270109	0.0501349	0	0.290349	0.172705	0.123622	0	0.185332	0.0838424	0	0	0.185289	0.292758	0.0653284	0	0.370697	0.180358	0.117762	0.0456831	0	0.219163	0.100471	0.336125	0	0.157278	0.115175	0.416929	0.159725	0.453217	0	0	0.201094	0.0845975	0.0685208
4634	chr19:20087908-20096742	0.0501243	0.0497442	0.142891	0.209241	0	0.0868083	0	0.101335	0	0.14732	0.145288	0.199159	0.0264403	0.0899494	0.0501595	0.139651	0	0.161754	0.144321	0.172176	0	0.412996	0.186835	0.129583	0	0.20645	0.163096	0.291157	0	0.258145	0.050239	0.459237	0.0254502	0.0531259	0.162795	0.083959	0.280884	0.246004	0.219049	0.256657	0.398181	0.355933	0.100995	0.362629	0.112087	0.11203	0	0.0763462
4487	chr17:76606001-76611275	0	0.0833156	0.15955	0.116818	0.347993	0.145394	0.0852635	0	0	0.0822481	0	0.142957	0	0.225982	0.0840112	0.0467799	0	0	0.161148	0.0576748	0	0.0864649	0.0782317	0.162778	0	0.345779	0.273167	0.487654	0	0.34589	0.420722	0.329644	0	0.533878	0.340828	0.281243	0.235224	0.247217	0.220129	0.107467	0.277878	0.0745182	0.253733	0.253067	0.281598	0.187637	0.0789363	0.0639354
528	chr2:47582986-47591646	0.255657	0.0507436	0.145762	0.0711482	0.211946	0.309933	0.25965	0.103371	0.0147234	0.15028	0.247011	0.116091	0.0134857	0.137635	0.102334	0	0	0.165004	0.147221	0	0	0.0526616	0.142942	0	0	0.210598	0.166373	0.0742516	0.0737629	0.0526663	0.409986	0.368078	0.0259615	0.216773	0.0830327	0.0856457	0.143264	0.150568	0.0893801	0.0654532	0.101545	0.317698	0.154536	0.154131	0.114338	0.514264	0.0961526	0.07788
4071	chr14:20807624-20817205	0	0.229331	0.263503	0.0643096	0.287361	0.280143	0.0469385	0.12458	0.0931574	0.181114	0.0893075	0.393498	0	0.0829371	0.277495	0.0257529	0.0204461	0.0497147	0.0443568	0.0635012	0.168028	0.1428	0.129202	0.0597406	0.0392631	0.0951778	0	0.201344	0.0666729	0	0	0.272209	0.164263	0.146953	0	0.0516091	0.129493	0.136096	0.0403945	0.147905	0.214165	0.123069	0.0465609	0.0278632	0.0516742	0.103296	0.130366	0.140789
1291	chr4:4042123-4049022	0.064181	0.0636942	0.182963	0.178613	0	0.111152	0.0651833	0.259506	0	0.188634	0.0620105	0.10929	0	0.230349	0.256904	0.178814	0	0.207116	0.554382	0.396827	0.100003	0.396611	0.418653	0.124442	0.0272622	0.0660865	0.0696114	0.186404	0	0	0.128655	0.0420017	0.0977618	0.136049	0.208448	0.215008	0	0.188995	0.0560957	0.123237	0.0424871	0.0569686	0.0646589	0	0.14352	0.143447	0.241385	0.0488782
3951	chr13:42865081-42873158	0.274108	0.0544058	0.104188	0.114425	0.0568106	0.189887	0.0556778	0.0738875	0.015786	0.0537087	0.158903	0	0	0.0491893	0.16458	0	0	0.0589708	0.157846	0.263635	0	0.225849	0	0.106295	0	0.225797	0.0594601	0.0796104	0	0.451738	0.0549469	0.358767	0	0.406731	0.0890253	0.214263	0.204804	0.645738	0.287492	0.385974	0.145165	0.048661	0.165689	0.165255	0.12259	0.306322	0.309276	0.250502
4474	chr17:55008205-55018728	0.0420799	0.208804	0.319889	0.0878299	0	0.182191	0.0427371	0.113429	0	0.247354	0.0406568	0.262736	0	0.0377567	0.0842188	0.140686	0	0.181059	0.242318	0.0867259	0	0.130018	0.392125	0.217573	0	0.173317	0.136921	0.0916609	0	0.130029	0.168704	0.137691	0	0.0445997	0.136668	0.281937	0.235805	0.371741	0.147115	0.188532	0.0557128	0.298809	0.12718	0.30443	0.0470489	0.141076	0.158263	0.128187
4768	chr19:52740546-52749825	0	0.142076	0.0906927	0.0332012	0.0989042	0.0413228	0.290796	0.0321586	0	0	0.0461069	0.135435	0	0.171272	0.477542	0.106364	0	0.153998	0.183201	0.0327839	0	0.196596	0.133407	0.246739	0	0.245688	0.258792	0.173247	0	0.0491533	0.334809	0.0624594	0.0242298	0.30347	0.0774942	0.106577	0.133708	0	0.0834182	0.0610873	0.0631812	0.127074	0.0961523	0	0.160068	0.159987	0.179478	0.0363426
4762	chr19:52460889-52466346	0.162275	0.241566	0.231301	0.282253	0.252244	0.0702594	0.164809	0.109356	0	0	0	0.0460547	0	0.218405	0.162389	0.135634	0	0.0872786	0.233617	0.167223	0	0.0835659	0.226826	0	0	0	0.176005	0.0589129	0	0	0.162646	0.0530985	0	0.0859963	0.13176	0.135906	0.0757791	0.398213	0.283665	0.051932	0.107424	0.432118	0.408709	0.244582	0.272156	0	0.0762897	0.0617917
4190	chr14:80464410-80472959	0.10359	0.102805	0.049218	0.108108	0.161023	0.0897019	0.157812	0.279234	0	0.253719	0.200174	0.0293996	0	0.0464739	0.103663	0.317474	0	0.167146	0.0994214	0.106749	0	0.160036	0.144797	0.133903	0	0.213332	0.168533	0.150431	0	0.3201	0.155741	0.101688	0	0.329381	0.210277	0.173515	0.193498	0.152523	0.0452702	0.0994544	0.102863	0.0919493	0.208724	0	0.231646	0.289411	0.194802	0.236673
3417	chr11:23183937-23189778	0.0758043	0.150459	0.144065	0.05274	0.392773	0.196924	0.0769882	0.102168	0	0.148531	0.585926	0.129083	0	0.272065	0.0758574	0.0422396	0	0.0815417	0.145507	0.104154	0	0.234219	0.141278	0.0979861	0	0.0780549	0.164436	0.0550405	0	0.312319	0	0.0496083	0	0	0.123099	0.169298	0.070798	0.0744076	0.331274	0.145556	0.100363	0.201857	0.0763688	0.0914021	0.0847556	0.254139	0.0712751	0.11546
2579	chr7:100838697-100847199	0.0520814	0.258432	0.0989802	0.181176	0.323826	0.360791	0.10579	0.24568	0	0.306145	0.150961	0.0886863	0	0.233654	0.104236	0.145104	0	0.33614	0.149956	0.0715593	0	0.10728	0.0485326	0.0336608	0	0.160883	0.0564881	0.113447	0.0751335	0.0536449	0.156602	0	0.0264439	0.165601	0.253727	0.145395	0.0972838	0.153366	0.136561	0.100004	0.172387	0.184915	0.209877	0.125596	0.0582315	0	0.391757	0.0396636
3203	chr10:20118010-20124934	0.191848	0	0.425372	0.355936	0	0.221502	0.064948	0.172379	0	0.250604	0.0617866	0.254089	0.303595	0.631172	0.255976	0.178169	0.0282909	0.137579	0.0613757	0.131798	0.0332139	0.197589	0.0595917	0.165324	0	0.197544	0.13872	0.185731	0.123006	0.0658689	0.0640955	0	0	0.0677787	0.0519239	0.0714106	0.238904	0.125542	0.16768	0.286515	0.0423337	0.170289	0	0.154215	0.143001	0.142929	0.180385	0.194807
2317	chr6:121191690-121199363	0	0.11454	0.329018	0.080299	0.119603	0.149912	0.175827	0.194443	0	0.0565362	0	0.131022	0	0.103558	0.115496	0.0964675	0	0.248301	0.110771	0.158579	0	0.11887	0.161326	0.223782	0	0.237684	0.125181	0.335206	0	0	0	0.188827	0	0.244653	0.0937121	0.225543	0.16169	0.0566444	0.252189	0.147743	0.191009	0.102445	0.290687	0.313118	0.0645221	0.0644896	0.162779	0.0878966
936	chr3:44855961-44861808	0.0757265	0.150304	0.0719587	0.26343	0.156948	0.0655738	0.0769092	0.204126	0.0872225	0.445135	0	0.12895	0	0.20384	0.227339	0.126589	0	0.244374	0.072679	0.104047	0.117992	0.155986	0.141133	0.195771	0	0.0779748	0.574937	0.054984	0	0.155999	0.227699	0.0991148	0.0384494	0.0802612	0.0614865	0.126843	0.0707254	0	0.19856	0.0484687	0	0.134433	0	0.0456542	0.0846687	0.253878	0.142404	0.173013
2383	chr6:158296637-158303484	0	0.0641779	0.184352	0	0	0.0559982	0	0.0435794	0	0.316778	0.124963	0.146826	0	0.116049	0.0647137	0.108103	0	0	0.186197	0.177707	0	0	0.120523	0.167183	0	0.133177	0	0.187819	0	0.0666096	0	0.211603	0	0.0685408	0.210031	0.144427	0.120795	0	0.33913	0.331127	0.214049	0.229605	0.390899	0.311899	0	0.144537	0.0608045	0.196997
1475	chr4:77630583-77637015	0.20652	0.136636	0	0.0957896	0.0713377	0.0596107	0.139831	0.139172	0	0.337213	0.0665121	0.0390746	0.0181564	0	0.0688884	0.0767181	0	0.148101	0.0660697	0.0472928	0	0.354502	0.256597	0.266952	0	0.070884	0.14933	0.0499839	0	0	0	0.225254	0	0.29185	0.0558951	0.230616	0.128588	0.202715	0.361008	0.176244	0.227857	0.122208	0	0.124507	0.153938	0.153861	0.064727	0.681544
2305	chr6:118579852-118590655	0.204947	0.0406784	0.233699	0.285179	0.212382	0.141975	0.291406	0.331468	0	0.120472	0.158413	0.139596	0	0.183891	0.0820361	0.13704	0.0181335	0.132275	0.118019	0.0844782	0	0.0844321	0.114589	0.105967	0	0.0844126	0.222287	0.119047	0.0197106	0.0422198	0.041083	0.134122	0	0.173776	0.133126	0.205973	0.0765646	0.241405	0.107477	0.157411	0.189941	0.181916	0.165178	0.321253	0.229148	0.091613	0.154161	0.156081
3894	chr12:104824074-104828664	0	0.191457	0.274982	0	0.0999599	0.0835277	0	0.130007	0	0.189004	0.0931981	0	0	0.3462	0.193056	0	0	0.103761	0.185156	0	0	0	0.179774	0.187029	0	0.099324	0.209244	0.0700385	0	0.0993558	0	0	0	0.204473	0.234964	0.269287	0	0.189366	0.168617	0.246957	0.127711	0	0	0.174462	0	0	0.0906968	0.220383
2724	chr8:9058881-9065201	0.28024	0.278114	0.199722	0.243717	0.0726018	0.182001	0.284616	0.141638	0.0201739	0.137275	0.0676906	0.278368	0	0.251449	0	0.0390387	0	0.226087	0	0.288784	0	0.0721567	0.130572	0.0905608	0.0297594	0	0	0	0.168449	0.072163	0.14044	0.137547	0.0355723	0.0742553	0.455084	0.0391171	0.065433	0.206307	0.183702	0.0448418	0.231894	0.124374	0	0.126714	0.156666	0	0.131748	0.0533554
3344	chr10:102836000-102844467	0.15689	0.2595	0.149084	0.0727698	0.216776	0.271712	0.212454	0.246696	0	0.153705	0.101056	0.0890529	0	0.0938478	0	0.145704	0.115679	0.0562549	0.150576	0.0718551	0.0543236	0.161586	0.146199	0	0.0666424	0.269247	0.510495	0.18986	0	0.269333	0.157249	0.171122	0.132766	0.110857	0.127388	0.145996	0.0976859	0	0.0457086	0.066945	0.138479	0.278519	0.105372	0.0630575	0.0584722	0.175328	0.0983441	0.119483
5430	chrX:63409349-63416708	0.0601696	0	0.0571758	0.0418624	0.124705	0.208411	0.0611094	0.121643	0	0.235793	0	0.273225	0	0.161964	0.120424	0.0335277	0	0.129447	0.115496	0.165345	0	0.185911	0.224278	0.155553	0	0.0619561	0.130521	0	0.0289339	0.123952	0.0603072	0.196883	0	0.318864	0.244275	0.06719	0.224784	0.177183	0.368128	0.154046	0.119495	0.106816	0.121235	0.145101	0.201824	0.201723	0	0.229116
2985	chr8:145021244-145028842	0.116554	0.231341	0.110755	0.0810915	0.181175	0.25232	0.177562	0.15709	0	0.114188	0.112613	0.132316	0.0153704	0.26145	0.408227	0.0974196	0	0.062688	0.111864	0.280253	0	0	0.0543061	0.0753303	0	0.0600075	0.0632081	0.0423143	0	0.0600266	0.116821	0	0	0.061767	0.283911	0.162692	0.108857	0.286017	0.254679	0.335703	0.270052	0.0517283	0.0587112	0.140537	0	0.0651261	0	0.133146
1463	chr4:73357145-73370272	0.0337331	0.100432	0.192328	0.0704084	0.209742	0.146053	0.37686	0.113662	0	0.79316	0.619255	0.689305	0	0.0908025	0.168784	0.0939838	0	0.145145	0.29138	0.0695234	0	0.0694854	0.062869	0	0	0.0694693	0.0365873	0.122466	0	0.0347458	0.135241	0.154531	0	0.10726	0.164339	0.188345	0.189032	0.264893	0.117934	0.194318	0.200979	0.239539	0.101953	0.183034	0.150866	0.0376975	0.0317176	0.10276
1043	chr3:101632045-101642053	0.17698	0.263457	0.0840872	0.153915	0.0917006	0.191565	0.134808	0.178898	0	0.216734	0.170995	0.150684	0	0.0793988	0	0.197234	0	0.190375	0.339715	0.334357	0	0.136708	0.0412301	0.085788	0	0.0911173	0.191955	0.192754	0	0.13672	0.133039	0.0289551	0.04493	0.0468946	0.107775	0.123518	0.165292	0.173719	0.0773425	0.141595	0.0585795	0.039273	0.0445745	0.106698	0.445227	0.148334	0.166406	0.0336956
2986	chr8:145028946-145032162	0.137659	0	0.261619	0.0957747	0.285307	0.357609	0.139809	0.278301	0	0.134864	0.133004	0.078137	0	0.370549	0.137755	0.153412	0	0.148078	0	0.283712	0	0.141779	0	0.0889703	0	0	0	0	0	0	0.137974	0	0	0.145902	0	0.15372	0.257135	0	0.120317	0.176217	0.0911287	0.122189	0.138684	0.0829921	0	0.153837	0	0.31451
4894	chr21:36104268-36109979	0	0.0769415	0	0.161821	0	0.13427	0.0787404	0.156739	0	0.0759556	0	0.220034	0	0.0695643	0	0	0	0.416987	0	0.106525	0	0.1597	0.144493	0.150324	0	0.239494	0	0.0562932	0	0.239571	0.155414	0.0507373	0	0.0821722	0.566555	0.259726	0.289637	0.0761011	0.203288	0.396982	0.0513237	0.206451	0.468641	0.327188	0	0.086641	0.145794	0.118088
3652	chr11:118721048-118730032	0.0492875	0.0489137	0	0.0342913	0.0510758	0.298757	0.150172	0.0664288	0	0.144861	0.190483	0.167858	0	0.221119	0.246611	0.082392	0	0.26509	0.331128	0.270882	0	0.152288	0.275574	0.0955651	0	0.101502	0.0534578	0.143148	0	0.101534	0.197601	0.25804	0	0	0	0.0550382	0.138098	0.0483794	0.086157	0.063093	0.195767	0.0874977	0.148964	0.208002	0.0551077	0.11016	0.0926854	0.112607
2480	chr7:46035743-46045152	0.094123	0.140114	0.0894398	0.163713	0.0975379	0.122256	0.0477965	0.158571	0	0	0.18188	0.213702	0	0.211133	0.094189	0.157341	0	0.101247	0.0903351	0.193986	0	0.04847	0.131564	0.24333	0	0.193835	0	0.170854	0	0.193897	0.0471691	0.153991	0	0.0498797	0.0382118	0.0525524	0.307674	0.369555	0.411329	0.331339	0.0311542	0.0835459	0	0.0567451	0.0526187	0.0525923	0.0884992	0.179203
3196	chr10:15011465-15019215	0.228538	0.113402	0.162875	0.0397506	0.177622	0.197897	0.0580267	0.231014	0	0	0.0552022	0.0648604	0	0.102529	0.114349	0.0636728	0	0.0614587	0.10967	0.157004	0	0.353066	0.159724	0.258486	0	0	0.247874	0.165938	0	0.176548	0.286325	0	0.0580189	0.42389	0.185562	0.414704	0.266806	0	0.0499368	0.0731377	0.0756447	0.0507139	0.0575599	0.0688906	0.127762	0.127698	0.268603	0.0870234
3175	chr9:134924094-134928770	0.0946865	0.375873	0.17995	0.329386	0	0	0	0.191425	0	0	0.0914844	0.214981	0.0249732	0	0.284259	0.105522	0	0	0	0.065049	0.0983562	0	0.0882344	0	0	0.194995	0.102698	0.275002	0	0.0975289	0.189806	0	0.0480762	0.200713	0.153762	0.158601	0.0884332	0	0.0827583	0.181812	0.250726	0.168092	0.286175	0.0570848	0.317602	0.105814	0.356116	0.14422
2734	chr8:12216469-12225829	0	0.0938981	0.089908	0.0658278	0.0980484	0.163861	0.28828	0.159402	0	0.139042	0	0.134263	0	0.0424476	0.047341	0.0790825	0	0.254442	0.045404	0.195001	0	0.389789	0.220421	0.214029	0	0.0974248	0.256553	0.240447	0	0.24364	0.094832	0.216716	0	0.100282	0.115236	0.290551	0.0441835	0	0	0.181676	0.250538	0.125975	0.238301	0.171126	0.105788	0.158603	0.0444812	0.180141
1094	chr3:124752568-124758183	0	0.156514	0	0.109725	0.163432	0.204848	0.400432	0.371977	0	0	0.304752	0.044759	0	0.141507	0.15782	0.131818	0	0.254469	0.151363	0.108346	0	0.243644	0.220445	0.0509646	0	0.324784	0.0855268	0.171766	0	0.324888	0.15807	0	0	0.167154	0.19208	0.0440276	0.294588	0.232206	0.068921	0.050471	0.156603	0.139987	0.158884	0.0475402	0	0.44061	0.0741433	0.120107
1637	chr4:138927814-138934855	0.18866	0.0624098	0.0597578	0.0437528	0.0651684	0	0	0.0847576	0	0	0.0607601	0.0713907	0	0.225704	0.440516	0.105125	0	0	0.0603559	0.0432028	0	0.129538	0.117203	0.121933	0	0.129508	0.136415	0.0456613	0	0.0647746	0	0.411547	0	0.133305	0.102122	0.0702241	0	0.246912	0.109929	0	0.208152	0.223279	0.12671	0.151653	0.0703127	0.140555	0.295647	0.143678
2978	chr8:142720778-142724571	0	0	0	0.162418	0.362875	0.202149	0.355639	0.157318	0	0	0.338328	0.198761	0	0	0	0.195122	0	0.125558	0	0.160377	0	0.36065	0.10877	0	0	0.240378	0	0.0847513	0	0.240455	0.350971	0.22916	0	0	0	0.130342	0	0.458291	0.102019	0	0	0.207213	0.235185	0.0703705	0.130507	0.130441	0	0.266678
2306	chr6:118574056-118578291	0.104544	0.415005	0.397369	0.218206	0.325011	0	0.31853	0.352256	0	0	0.202017	0.0593406	0	0.28141	0.209235	0.058254	0	0.112457	0.100337	0	0	0.323019	0.194841	0.135136	0	0.107648	0.11339	0.0759081	0	0	0	0.136833	0	0.110804	0	0.175113	0.292919	0.205236	0	0.20074	0.138414	0.278388	0	0.189083	0	0	0.0982977	0.159235
3777	chr12:43977407-43979740	0.189738	0.188299	0	0.132008	0	0.492899	0.192701	0	0	0	0	0	0	0	0	0.105726	0	0	0.182102	0.130349	0	0	0.176809	0.490518	0	0.195371	0.205792	0.137766	0	0	0	0.248339	0	0	0.308118	0.105938	0.177207	0.186242	0.331671	0	0.251209	0.505249	0	0.11439	0.212143	0.212037	0.535204	0.288997
3372	chr10:130292253-130295850	0.246164	0.244297	0.116958	0.171266	0.127547	0	0	0.0829437	0	0.241167	0	0	0	0	0	0.274335	0	0	0.118129	0.0845565	0	0.126766	0.573475	0.397745	0	0.126736	0	0	0	0.126777	0.123363	0.080548	0	0.130452	0.099937	0.274885	0.229907	0.241628	0.753036	0	0.244437	0.109251	0	0.296816	0	0.137547	0.115728	0.0937352
2457	chr7:32832026-32843665	0.0380454	0.0755137	0.0361524	0.0529394	0.197129	0.230613	0.0772792	0.102554	0	0.0372731	0	0	0	0.0682735	0.0761442	0.0423993	0	0.0409249	0.182572	0	0.11856	0.0783681	0.0354529	0.0245891	0.145445	0.195875	0.206322	0.359116	0	0	0.0381324	0.0248979	0	0	0.0926735	0.148695	0.24873	0.112033	0.299273	0.0974038	0.226671	0.439011	0.114986	0.0688107	0.127614	0.297616	0.286178	0.115897
1119	chr3:130176662-130184109	0.118917	0.118016	0.113001	0.0827356	0	0.205948	0.181162	0.160275	0	0	0.28724	0.0674991	0	0.0533501	0.0595004	0.0662631	0	0.191877	0.114132	0	0.0617632	0.306191	0.221629	0.230573	0	0	0.128979	0	0	0.244974	0.0595947	0.311291	0.0301896	0.0630193	0.0482778	0.0331981	0.166596	0.0583632	0.0519684	0.152226	0.275527	0.263885	0.119803	0.143386	0	0.0664465	0.0559061	0.0905637
3785	chr12:46727181-46734247	0.125329	0.124378	0	0.087196	0.129876	0	0.063643	0.0844578	0	0.122784	0	0.177845	0	0.168679	0.501666	0.174589	0.0554448	0.0674072	0.300712	0.12915	0.0325465	0.0645397	0.233577	0.121502	0	0.12905	0.0679664	0	0	0.129091	0	0.123027	0	0.132834	0.152642	0.0349878	0.409681	0.0615097	0.10954	0.120325	0.0414831	0.500601	0.252524	0.264454	0.140128	0.140058	0.11784	0.0954462
5359	chrX:47866275-47875865	0.0461733	0.0458232	0.307132	0.0963739	0.0478486	0.399829	0.187578	0.155579	0	0.22618	0.0892237	0.18346	0	0.0828592	0.231029	0.128643	0	0.0496681	0.221576	0	0.0239814	0.0475553	0.0860541	0.119369	0	0.0475442	0.10016	0.0670517	0	0.0951189	0.0925579	0.0604341	0	0.146815	0.187453	0.0515607	0.129372	0.135968	0.201783	0.118213	0.213964	0.163938	0.186069	0.139185	0.154877	0.257999	0.0868291	0.246149
1764	chr5:16419969-16426090	0	0.215366	0.206214	0	0.44977	0.689029	0.514269	0.146242	0	0.354344	0.069891	0.0821191	0	0.259622	0	0	0	0.311249	0.208278	0.0496952	0	0.298009	0	0	0	0.0744849	0.235373	0.157569	0	0.149017	0.0725026	0	0	0.230007	0.293673	0.161554	0.06756	0	0	0.138898	0.0478865	0.0642083	0	0.218054	0.161758	0.161677	0.0680152	0.165269
1538	chr4:101899964-101906852	0.0642834	0.0637959	0.305425	0.134174	0.0666157	0	0	0.2166	0	0.125957	0.124219	0.291905	0	0.0576791	0.0643285	0.1791	0	0.345744	0.185089	0.132487	0	0.132415	0.0599031	0.498564	0.109223	0	0	0.140026	0	0	0	0.33655	0.0326393	0	0.104391	0.107676	0.120076	0.063099	0.112371	0.205723	0.127665	0.228238	0	0.58133	0.0718743	0	0.120885	0.342693
2196	chr6:70436656-70448522	0	0.0370346	0.212765	0.0259634	0.0773432	0.0323145	0	0.12574	0	0.255921	0	0.084728	0	0.0669675	0.149375	0.0623824	0	0.0401421	0.107448	0.076911	0	0.0384345	0.0695496	0.19295	0	0.0768512	0.0404752	0.189671	0	0.230627	0	0.122108	0.0189477	0.197762	0.0606005	0.0833434	0.348531	0.549451	0.0978496	0.286622	0.271743	0.0993722	0.413551	0.24748	0	0	0.0701759	0.17052
1080	chr3:119978070-119990309	0.0723609	0.215436	0.378183	0.226549	0.187466	0.156649	0.183728	0.219435	0	0.035446	0.209741	0.0616095	0.00954247	0.357097	0.108617	0.100802	0	0.155675	0.138898	0.0745672	0.0187913	0.260843	0.26972	0.116919	0.0307368	0	0.156967	0.0788104	0.0173982	0.0372665	0.0362632	0.0947097	0.0734811	0	0.0587538	0.0404018	0.101373	0.142055	0.158113	0.0926291	0.0958042	0.096344	0.1458	0.218125	0.161811	0.16173	0	0.0826616
3072	chr9:75351158-75357591	0.0688294	0.136615	0.196214	0.0478873	0.0713267	0.119203	0.0699044	0	0	0.134864	0.0665018	0.0390685	0	0.123516	0.0688777	0.0767062	0	0.0740389	0.198178	0.0472854	0	0.141779	0.0641393	0.0444851	0	0.141746	0.149306	0.149928	0	0.141791	0	0.450438	0	0	0.0558864	0.11529	0.514271	0.270245	0.180476	0.132163	0.0455643	0.122189	0.069342	0.041496	0.153914	0.230755	0.064717	0
4806	chr20:1728521-1733344	0.0918011	0.0911049	0.0872335	0.127739	0.475659	0.158987	0.0932349	0.185592	0	0	0.0886966	0.104215	0	0.247109	0.0918655	0.0511534	0	0.0987492	0.0881067	0.0630668	0.381436	0.283646	0	0.355992	0	0.378107	0.199137	0.0666556	0	0	0	0	0	0	0	0.051256	0	0.0901097	0.0802364	0.0587573	0.243085	0.16297	0.18497	0.166036	0.102641	0.10259	0.0863161	0.209738
5428	chrX:63317608-63327790	0.043489	0.0431592	0.0826503	0.030257	0	0.0376584	0.132505	0	0	0.0426062	0.0840366	0.0493699	0	0.0390211	0.217598	0.0242329	0	0.233903	0.0834777	0.17926	0	0.179162	0.243154	0.0281074	0	0.0447802	0	0.0631536	0	0.134384	0.0871769	0.0284603	0.0220811	0.0921865	0.0353111	0.169971	0.203085	0.0853755	0.228063	0.139176	0.201525	0.0772038	0.0438129	0.288406	0.145873	0.0971999	0.368015	0.165599
1716	chr4:174982917-174990374	0	0	0.0564245	0	0	0.051418	0.120613	0.120045	0	0.0581736	0	0.0337043	0	0.0532786	0.0594206	0	0	0.510986	0.398925	0.489516	0	0.122312	0.331997	0.191886	0	0.0611419	0	0	0	0.122323	0.0595148	0.0777183	0	0	0	0	0	0.23314	0	0.076011	0.0393083	0.0527063	0	0	0.0663908	0	0.0558312	0
3689	chr12:8416652-8425779	0.0970308	0.0962949	0.184406	0.16877	0	0.0840219	0.147819	0.0326941	0	0.142592	0.328123	0.055076	0	0.0435311	0.0970988	0.0811012	0	0.365312	0	0.0666596	0.0503957	0.249837	0.0452095	0.188136	0	0.0499558	0.263102	0.0352264	0	0	0	0	0	0	0.118177	0.027088	0.181245	0.380972	0.212018	0.0310523	0.09635	0.258381	0.0977534	0.146245	0.37971	0.216868	0.2737	0.110843
1376	chr4:37545757-37552478	0.0658805	0.196142	0.187808	0.0458356	0	0.228191	0.133819	0	0	0.258172	0.0636526	0	0	0.118224	0.19778	0.11013	0	0.283467	0.189688	0.0452595	0	0.203557	0.184174	0.0851584	0	0.0678365	0.214364	0.143505	0	0.0678581	0.132062	0.215569	0	0.139651	0.213968	0.0367836	0	0	0.0575811	0.0421668	0	0.116954	0.132742	0.0794363	0.07366	0	0	0.0501725
1870	chr5:69636156-69655311	0	0.0229427	0	0.0321682	0	0	0.0234791	0.015579	0	0.0679461	0.0446724	0.0656104	0	0.0414859	0.0231342	0	0.409092	0.348148	0.133126	0.174701	0.012007	0.0238099	0.0646282	0.0298828	0.0687391	0.214239	0.325963	0.134285	0	0.023812	0	0.0302581	0.11738	0.122512	0.319103	0.154892	0	0	0.0202057	0.0295933	0.0459116	0	0.0698705	0.0139374	0.0516958	0.0516698	0	0.0176059
2049	chr5:175991930-176006067	0.0939698	0.0932572	0.119059	0.15255	0.292138	0.298361	0.063625	0.253302	0	0.0613748	0.15132	0.124457	0	0.477789	0.188071	0.122178	0.0138573	0.404328	0.120251	0.0645567	0	0	0.0875666	0.0404891	0	0.19352	0.101921	0.0909737	0	0.129054	0.0627898	0.0204988	0	0.033199	0.203465	0.0524669	0.0585093	0.0614923	0	0	0.0414713	0.0278033	0	0	0.105066	0.175022	0.206162	0.0954192
2098	chr6:26288074-26296131	0	0.109082	0.156669	0.0382362	0	0	0.111632	0.0370354	0	0	0	0.124779	0	0.246557	0.0549962	0.122494	0	0.0591172	0.105492	0.188778	0	0	0	0.106559	0	0.226357	0.238431	0.119712	0	0.169822	0.0550833	0.179829	0	0.0582487	0.0892463	0.0306849	0.410625	0.32367	0.144103	0.457283	0.254669	0	0.276835	0.430729	0	0	0	0.20927
4719	chr19:38751881-38766542	0.0302038	0.0899243	0.143505	0.042028	0	0.0523088	0	0.0407082	0	0.0887721	0.0875472	0.0342882	0	0.189705	0.030225	0.201962	0	0.162449	0.115953	0.145249	0.0156872	0.0622156	0.0844371	0.0976052	0	0.186603	0.163797	0.241237	0	0.0311105	0.0605458	0.138363	0.0153357	0.2561	0.0735725	0.0505918	0.197464	0.148237	0.184792	0.135324	0.0799784	0	0.0608575	0.145675	0.101311	0.303781	0.312391	0.0230023
4830	chr20:24919442-24933027	0.0651919	0.0323487	0.0619482	0.13607	0.135114	0.225806	0.165525	0.153763	0	0.0638685	0.0629873	0.148015	0.00859707	0.0292471	0.163094	0.0908155	0	0.105189	0.0625683	0.111966	0.0846482	0.067143	0.0607496	0.0842683	0.0553833	0.100691	0.17677	0.047335	0.0626979	0.201447	0.228693	0.12799	0.0331006	0.0345479	0.0793994	0.0727982	0.0608865	0.0319954	0.0569793	0.020863	0.0431563	0	0.0656774	0.117909	0.109335	0.0364267	0	0.12412
470	chr2:12569897-12574343	0.298751	0.0988284	0.189258	0	0	0.517395	0.202278	0.0671085	0	0	0.096216	0	0	0	0	0.05549	0	0	0.191152	0.136827	0.0517216	0.307692	0	0.0643619	0	0.205081	0.216019	0.216919	0	0	0.0998114	0.13034	0	0.105547	0	0.166804	0.093007	0	0.348154	0	0.0659233	0.0883929	0.200651	0	0.222686	0	0	0.0758397
5201	chrY:21035960-21045092	0	0	0	0	0	0	0	0	0	0	0	0	0	0.261043	0.291137	0.324227	0	0	0	0	0.12592	0.54934	0.361478	0.53276	0.12358	0.698998	0.157775	0.774556	0	0	0	0	0	0	0	0	0	0	0	0	0	0	0	0	0	0	0	0.0738551
4154	chr14:53175755-53181523	0.0767635	0.228544	0.072944	0.267037	0.0795486	0.199415	0.0779624	0.155191	0	0.225616	0.148335	0.043572	0	0.137754	0.153635	0.0427741	0	0.0825735	0.0736742	0.0527361	0	0.158122	0	0.099226	0	0.0790426	0	0	0	0	0.076939	0.100472	0	0.0813603	0.124657	0.04286	0.143388	0.301397	0.268373	0.147397	0.101633	0.136274	0.0773352	0	0.0858281	0.17157	0.288708	0.233842
4180	chr14:70536593-70544307	0.114802	0.170897	0.10909	0.0399361	0.297418	0.0497052	0.0582975	0.232092	0	0.168707	0.277299	0.195489	0	0.103008	0.287206	0.0639699	0	0.123491	0.220364	0.197171	0.0596257	0.177357	0.160469	0.111296	0	0.236421	0.124516	0	0	0	0.172597	0.0375647	0.0291448	0.121677	0.186428	0.128197	0	0.112687	0.200679	0.146958	0.227993	0.0509505	0.0578285	0.103818	0.128358	0.128294	0.107943	0.0437148
1906	chr5:95706083-95713306	0.0613024	0.0608375	0.174757	0.0426505	0	0.159251	0.12452	0	0	0.240232	0.0592293	0	0.0323366	0	0.0613454	0.239112	0.16272	0.329711	0	0.0421144	0.0318392	0	0.11425	0.237722	0	0	0.132979	0.0445109	0	0.252571	0.0614426	0.200589	0.0622515	0	0.149324	0.13691	0.114508	0	0.0535798	0.11771	0	0.0544135	0.0617589	0	0.274165	0.0685068	0.115279	0.186744
2836	chr8:59778044-59788481	0.212133	0.0842096	0.161262	0.147589	0.483625	0.404123	0.473981	0.34309	0	0	0	0	0	0.152271	0.0424563	0.0945637	0	0.136913	0.366472	0.204028	0	0	0	0	0	0.0436862	0.0920327	0.154027	0	0	0	0.0277651	0	0	0	0	0.0792493	0	0.148327	0	0.224687	0.0753178	0.128228	0.127891	0	0	0	0.161554
942	chr3:46387406-46393402	0.221535	0.366425	0	0.154131	0.153048	0.191834	0.299993	0.0995269	0	0	0.0713477	0.125746	0	0	0.0738968	0.0411479	0	0.0794341	0.21262	0.101462	0	0.608441	0.137626	0.0954535	0	0.0760375	0.160186	0.107236	0.07102	0	0	0	0	0.234801	0.0599589	0.0824609	0	0	0.0645423	0	0.0488846	0.0655467	0	0	0.16513	0.165047	0.416597	0.112476
2303	chr6:117658787-117665200	0	0.0685204	0.196826	0.0480367	0.0715491	0.0597873	0.140245	0.279169	0	0.135285	0.200127	0	0	0	0.0690925	0.0769454	0	0.519888	0.0662654	0.0948657	0	0	0.193018	0.0892477	0	0.213282	0	0.200528	0	0	0	0.0903684	0	0.146357	0.168182	0.0770998	0.0644843	0	0	0	0.0457064	0.0612852	0.0695582	0.0832509	0.154394	0.231475	0.194756	0.0525817
5489	chrX:75205622-75210629	0.176856	0.0877576	0	0.061523	0.27491	0.153145	0.0898093	0.238364	0	0	0.0854378	0.150579	0	0.158687	0.17698	0.0492739	0	0.190242	0.169739	0.121499	0	0.0910748	0	0.057152	0	0.182107	0.191821	0.0642066	0	0	0.177261	0.0578697	0.0448986	0.0937236	0.287199	0.0493728	0.330353	0.173598	0.231865	0.0565985	0.0585385	0.235473	0	0.0533118	0.197741	0.0988206	0.332579	0.0673441
3379	chr11:3447426-3456906	0.140127	0.0927096	0.133155	0.097492	0.242019	0.12134	0.142316	0.125907	0	0.0915217	0.135388	0.132563	0	0	0.140225	0.156163	0	0.0502443	0.0448293	0.0641777	0	0.048107	0.0870525	0.060377	0	0.0480958	0.101322	0.0339148	0	0.144334	0.0468159	0.183406	0.0237161	0.148518	0.341331	0.104318	0.130873	0.0458485	0.0816497	0.0298961	0.34013	0.12438	0.282341	0.11264	0.208899	0.0521984	0.131755	0.0355721
557	chr2:64073267-64080444	0.185086	0	0.410379	0.0429238	0.0639336	0.267119	0.313294	0.207879	0	0.0604428	0.119218	0.105057	0	0.221427	0.123477	0.103133	0	0.0663648	0.296062	0.169537	0	0.127083	0.287456	0.0398743	0.157238	0.190581	0.133831	0.0895922	0	0.127095	0	0.08075	0	0.0653898	0.100188	0.172234	0.115242	0.0605585	0.107846	0.0789761	0.0408416	0.0547622	0.186464	0.14878	0.0689805	0.206838	0.116018	0.140955
3050	chr9:35003408-35011008	0.0582619	0.23128	0.332178	0.0810702	0.0603757	0.151352	0.177515	0.0392621	0	0.0570792	0.0562916	0.0661404	0	0.261381	0.0583027	0.194788	0.103099	0.188015	0.167752	0.0800511	0	0.120011	0.162876	0.0376552	0	0.119983	0	0.296122	0	0.240043	0.0583951	0.114384	0.0887458	0.185252	0.189224	0.130119	0.217657	0.0571884	0.101845	0.074581	0.0771375	0.103429	0	0.0351251	0.0651417	0.260436	0	0.177482
1842	chr5:50444531-50452389	0	0.0559219	0.0535455	0.0392044	0.0583937	0	0	0.0759464	0	0	0.0544436	0	0	0	0	0.0313989	0.0249287	0.0606141	0.108163	0	0	0.0580357	0	0	0	0	0	0.0818289	0	0	0	0.110629	0	0.0597236	0	0	0	0	0	0	0.0746052	0	0.0567689	0	0.0630032	0	0.0529824	0.0429138
1371	chr4:35855428-35864930	0.186404	0.092495	0.177129	0.0648442	0.0965833	0	0.0946575	0.0314039	0	0.18262	0.045025	0	0	0.0418133	0.139901	0.129835	0	0.050128	0.0447255	0.0640291	0.0726106	0	0.173702	0.0602373	0	0.0479845	0.0505439	0.0338363	0.0896363	0	0.233537	0.152484	0.0473224	0.0987831	0.113514	0.234172	0.217617	0.228712	0.162921	0.238615	0.0616986	0.0827283	0.140844	0.0561897	0.260519	0.0520776	0.306716	0.141959
2522	chr7:64945898-64951162	0	0	0	0.0585199	0	0.14567	0.0854255	0.170046	0	0.247213	0	0.047743	0.0221842	0.301882	0	0.0937375	0	0.0904779	0	0	0	0.346517	0.156761	0.108725	0	0	0.0912286	0.24429	0	0	0.0843041	0.0550449	0	0	0.13659	0.0939256	0.0785569	0.0825621	0.147031	0.107671	0.0556811	0.298639	0.169476	0.202838	0	0.187994	0.237259	0.128114
4254	chr15:39010622-39015774	0	0.170576	0.244992	0.0597918	0	0	0.174564	0.173742	0	0.0841954	0.0830337	0.146342	0	0.231332	0.344001	0.287325	0	0.277333	0.247444	0.11808	0	0.265536	0.0800839	0.222175	0	0.353966	0.0932115	0.0623999	0	0.17704	0.172273	0.731137	0	0.0910863	0.0697794	0.0959671	0.160529	0.0843565	0	0.0550058	0.227565	0	0	0.0518117	0.192176	0.0960398	0	0.0654491
713	chr2:152175877-152180478	0.384918	0.191	0.0914416	0.0669507	0.199442	0.166656	0.195465	0.0648482	0	0	0	0	0	0.0863432	0	0.053621	0	0	0.0923569	0.198327	0.0499796	0.0991096	0.0896724	0.186582	0	0	0.104372	0.069871	0	0	0.0964496	0	0	0.101992	0.312537	0.161186	0.0898744	0	0.084107	0.0615917	0.0637029	0	0.193892	0.0580151	0.430371	0.107539	0	0
501	chr2:33657072-33665918	0.150169	0	0	0.139305	0.103745	0.0866906	0.152514	0.337325	0	0.0490402	0.0483636	0.113651	0	0.0898274	0.100183	0.11157	0	0.269225	0.240209	0.103165	0	0	0.0932909	0.0647038	0	0.0515425	0.162875	0.181726	0	0.051559	0.250854	0.0655164	0.0254156	0.318323	0.203218	0.195638	0.140252	0.0982682	0.0437505	0.128154	0.0331368	0.0444313	0.151287	0.0905343	0.0559673	0	0.0470656	0.0381213
1081	chr3:120038402-120045736	0.120749	0	0.0573707	0.25203	0.0625652	0.104561	0.122635	0.122058	0	0.0591491	0.058333	0.137078	0	0.325032	0	0.067284	0	0	0.057945	0	0.0313573	0.0621817	0	0.0780416	0	0.124334	0.130966	0.0438373	0.0290325	0.124374	0	0.237065	0.0306547	0	0	0.067419	0.0563875	0.118525	0.263845	0.193214	0.0399674	0.321541	0	0.291191	0	0.0674701	0.283837	0.183918
4815	chr20:13357880-13365558	0	0.0572327	0.0548007	0.0802467	0.0597624	0	0.117142	0.0388633	0	0.282497	0.0557198	0.0654686	0	0.10349	0	0.0964047	0	0.0620349	0	0.079238	0	0.178188	0.107481	0.0372727	0	0.118765	0	0.083747	0	0.178204	0	0.264186	0	0.122247	0.0936511	0.0965982	0.107723	0.113215	0.504051	0.369117	0.152708	0.102379	0.116199	0.139073	0	0.128895	0.108449	0.0439197
2952	chr8:125987127-125994738	0.174533	0.173209	0.110566	0.080953	0	0.100756	0.0590863	0.117616	0.0670096	0.0569967	0.112421	0.13209	0.260851	0.104401	0.0582185	0.0972532	0.10295	0.125162	0.0558364	0.0399677	0.24173	0.119838	0	0.0752016	0.0247122	0.11981	0.189301	0.168968	0.027976	0.0599241	0.116621	0.152292	0.147696	0.0616615	0.141713	0.0324828	0.108671	0.114212	0.152546	0.0744732	0.038513	0.05164	0.117222	0.140297	0	0	0.0547016	0.0443063
1483	chr4:83201917-83208400	0.0682987	0.203342	0.129801	0.0950362	0.21233	0.177426	0.138731	0	0	0	0	0.0387672	0	0.367691	0.273386	0.0761147	0	0	0.0655501	0.234604	0	0	0.0636447	0.0882842	0	0.140653	0.0740775	0.0991815	0.131372	0.140698	0.0684548	0.0446964	0.034678	0	0.110911	0.114401	0.255152	0.0670403	0.119389	0.0437145	0.135639	0.242494	0	0.0411761	0.229091	0.0763253	0.192654	0
1968	chr5:122616935-122624322	0.179825	0.237948	0.113918	0.0834075	0.0621164	0.0519052	0.243511	0.0807882	0	0.176174	0.0579145	0.102071	0	0.107567	0	0.0668013	0	0.128957	0.230117	0.123539	0	0.0617356	0.0558571	0.0387408	0	0	0.130027	0.0870456	0	0.061741	0.120157	0.0392273	0	0.254124	0	0.234274	0.223932	0.0588372	0.209562	0	0.238084	0.0532057	0.120776	0.216826	0.13404	0.200958	0.169081	0.0456496
4699	chr19:28427792-28437238	0.140631	0.0465216	0.133634	0.163071	0.0485779	0.0811847	0.0952186	0.0315901	0.0674919	0.183702	0.135876	0.106432	0.0370911	0.0420611	0.04691	0.104483	0.0207383	0.10085	0.0899813	0.0644087	0.511287	0.14484	0.218414	0.181783	0.338505	0	0.101687	0.0340369	0	0.144853	0.187937	0	0.357022	0.149053	0.0380622	0.183213	0.131344	0	0.0409718	0.0900111	0.0930965	0	0.0944525	0	0.0524126	0.0523863	0	0.0357001
4484	chr17:75023738-75028744	0.0884459	0.263325	0.0840452	0.0615353	0.549929	0	0.179655	0.119206	0	0.173301	0.17091	0.100406	0	0.158718	0	0.0492838	0	0	0.169773	0.0607618	0	0	0.247257	0.114327	0	0	0.287788	0.128439	0	0.091101	0.265944	0.0578813	0.0898152	0	0.215442	0.0987654	0.0826048	0	0	0.0566098	0.175651	0.23552	0.178209	0.159967	0.19778	0.197681	0	0.26943
971	chr3:67037862-67044184	0	0	0	0.048728	0.145158	0	0	0.0943956	0	0.137232	0	0.0795087	0	0.188527	0.140174	0	0	0.226016	0.0672191	0.096231	0	0.504937	0.195796	0.0905321	0	0.144234	0.151927	0.15256	0	0.288561	0	0.091669	0.035561	0.148464	0	0.156419	0	0.137495	0.0612147	0	0	0	0	0.084449	0.0783081	0.234806	0.0658531	0
1068	chr3:113346633-113354655	0.0551974	0.219115	0.262255	0.115209	0.1144	0.0477971	0	0.074394	0	0.0540769	0.319984	0.0313308	0	0.0990531	0	0.0307571	0	0.178125	0.105952	0.0758405	0	0.170548	0.154308	0.0356746	0	0.113672	0	0.120234	0	0.113709	0	0.216736	0	0.175508	0.179271	0.123275	0.25776	0.270902	0	0.105987	0	0.195978	0	0.066555	0.123431	0.246737	0.0518994	0.12611
4607	chr19:9539407-9550555	0.158884	0.0788393	0.0754891	0.165812	0.20581	0	0.161365	0.133838	0.0571886	0.0778292	0.0767553	0.0676384	0	0.10692	0.119246	0.0885331	0	0	0.114367	0	0.0618906	0.0409097	0.111043	0.102688	0	0.122701	0.172327	0.144204	0.0191007	0.0409133	0.159247	0.0779832	0.0403359	0.336796	0.0967548	0.0443554	0.0741954	0.0389891	0.0694341	0.0508467	0.0788845	0.105772	0.12005	0.0478941	0.0444114	0.133167	0	0.0605004
698	chr2:142900244-142907915	0.0577227	0.0572849	0.109701	0	0.059817	0	0	0.0777976	0.0831069	0.282755	0.0557707	0.0327642	0.0304483	0	0.231053	0.0643284	0	0.0620915	0.0553997	0	0.11992	0.178351	0.107579	0.0746135	0	0.0594365	0.125213	0.0838234	0	0.0594555	0	0.151101	0	0.122359	0.0937365	0.128915	0.0539106	0.339955	0.100902	0.0738908	0.0764236	0.0512361	0	0.2088	0.129078	0.0645064	0.108548	0.175839
1313	chr4:9638437-9647147	0.0508379	0.0504523	0.0483084	0.0353699	0.263412	0.308154	0.206527	0.171296	0.0292777	0	0.0982373	0.0288562	0	0.0456149	0.101747	0.0849835	0	0.164057	0.0975839	0.174627	0	0.209437	0.0473737	0.229999	0	0.104694	0.165418	0.110738	0.0244465	0.104728	0	0.0665392	0.0258125	0.107764	0.123834	0.198693	0	0.0998024	0	0.0325388	0	0	0.0512165	0.0919477	0.113682	0.170437	0.143401	0.077433
4269	chr15:50867393-50875568	0.0541645	0.161261	0.102939	0.113053	0.0561296	0.140708	0.110021	0.182505	0	0.0530649	0.104665	0.153722	0	0.194399	0.162607	0.0905445	0	0.233056	0.103969	0.0372107	0	0	0.0504736	0.035007	0	0.278863	0.176242	0.117984	0.104185	0.223162	0.0542883	0.0354466	0.055003	0.344448	0.219896	0.15121	0	0.265832	0.142023	0.104004	0.0358563	0.0480777	0	0.0653096	0.0605605	0	0.203713	0.0412499
5675	chrX:118293077-118300607	0.17641	0.0583574	0.0558776	0.0409119	0.0609369	0	0.119444	0.118881	0	0.115219	0	0.0333776	0	0.0527621	0.0588447	0.131066	0	0.379524	0.282185	0.16159	0	0.121127	0	0.0380052	0	0	0.127558	0.0426964	0	0	0.176814	0.0384825	0	0.0623248	0.143237	0.0656644	0	0.23088	0.154187	0.225823	0.0389272	0.104391	0.0592413	0.0709031	0	0.0657142	0.16587	0.31348
1180	chr3:153227333-153232106	0.185525	0.0920591	0	0.0645386	0.0961281	0.321304	0.188423	0.125024	0.0267112	0.0908795	0.268877	0	0	0.249697	0	0.0516891	0	0.199567	0	0	0	0.382155	0.259325	0	0	0	0.301834	0.134707	0	0.0955472	0.185949	0.121412	0	0	0.0753191	0	0.0866364	0	0.162153	0.118745	0.122816	0.164677	0.186907	0.0559249	0.414866	0.103664	0.17444	0.070645
946	chr3:48328249-48333098	0.091309	0.0906165	0	0	0.0946218	0	0	0	0	0.0894554	0	0.0518282	0	0.245784	0.091373	0.101758	0	0	0	0.0627287	0.0474239	0.188083	0.0850871	0	0	0.28206	0	0.132597	0.131724	0.09405	0	0	0	0	0	0	0.511673	0.358507	0.159613	0.233769	0.241782	0	0.091989	0.220194	0.204182	0	0.0858534	0.139076
2830	chr8:55706202-55715876	0.0915449	0.136276	0.17398	0.127383	0.379465	0.158543	0.278924	0.431839	0.0263606	0	0.0442245	0.0779432	0	0.24642	0.274827	0.102021	0	0.14771	0.131791	0.125782	0.0237732	0.0471424	0.0853069	0.118333	0	0.0471314	0.0496453	0.0332348	0	0	0.0458771	0	0	0.0485135	0.148661	0.204452	0.0854991	0.0898582	0.0800125	0.0292966	0.0909026	0.162515	0.0461133	0.165572	0.153532	0.102304	0.215188	0.174294
1850	chr5:55083586-55091235	0.115777	0.344698	0.0550084	0.120826	0.059989	0.150383	0.235171	0.117032	0	0	0.055931	0	0	0.103883	0.0579293	0	0	0.12454	0.222236	0.238615	0	0.0596212	0.0539441	0.0748281	0.0491789	0.0596074	0.18836	0.168129	0	0.238506	0.0580211	0.151535	0	0.0613553	0.047003	0.0646429	0.108131	0	0.252981	0.0741033	0	0.256917	0.0583198	0	0.0647245	0.194076	0	0.0440862
4457	chr17:43872267-43876352	0.216764	0	0	0	0.112314	0.187702	0	0	0	0.106182	0	0.061519	0	0.486235	0.216916	0.0603925	0	0	0.10402	0	0	0.223251	0.100997	0	0.138113	0.1116	0.117552	0.0786947	0.0521178	0.111635	0.10863	0.070928	0.11006	0.114872	0	0.121027	0.202448	0	0.189457	0	0.143495	0.0962025	0	0.0653415	0.12118	0	0.509531	0
3568	chr11:83417916-83424075	0.215673	0.142692	0.068314	0	0	0.186758	0.0730138	0.14534	0	0.140863	0.0694598	0.122419	0	0.0645051	0.143883	0.0801181	0.0318043	0.0773322	0.275991	0.0987774	0.0373386	0	0.0669923	0.0929277	0	0.148051	0	0	0	0.222147	0.144111	0.0940947	0.109506	0.152392	0.0583723	0.0802789	0.0671432	0.0705664	0.0628345	0	0.142773	0.0638122	0.0724264	0.0433418	0.0803802	0.16068	0.135191	0.0547499
2080	chr6:16259015-16264895	0	0.224191	0.0715549	0	0.468202	0	0.229433	0.050745	0	0.0737729	0	0	0	0.135131	0.226063	0.0419595	0	0	0.144542	0	0.11733	0	0	0.146004	0	0.232612	0.163346	0.0546755	0	0	0	0.0492793	0	0.0798109	0.0611415	0.210219	0.351643	0.147828	0.131631	0.240984	0.149546	0.0668395	0.379312	0.136194	0	0	0.0708024	0
2858	chr8:72096360-72104776	0.0526136	0.0522146	0.0499957	0.0366053	0.0545225	0.0911194	0	0.0354558	0	0.206182	0.203337	0.298642	0	0.141625	0.0526505	0.0293173	0	0.0565957	0.201985	0.253017	0	0.325129	0.245142	0.136019	0	0.108351	0	0.19101	0	0.162579	0.0527339	0.20659	0	0	0.0854398	0.0881285	0	0.103288	0	0.168377	0.104489	0.233506	0.106011	0.0317198	0	0	0	0.360619
4615	chr19:9709656-9722342	0.0698114	0.103923	0.165845	0.0728558	0.108516	0.0604518	0.177254	0.117613	0	0.0683942	0.0674505	0.0792517	0.0184125	0.0626392	0.174651	0.155601	0.0463264	0.0375476	0.033501	0.09592	0.0181293	0.107851	0.0325272	0.112799	0	0.0718841	0.0757182	0.0506891	0	0.107861	0.174928	0.0228432	0.0354461	0.110988	0.255077	0.0974459	0.0978014	0	0.0915253	0.0223414	0.0231072	0.123933	0.105497	0.126264	0.0390275	0.312063	0.131281	0.0797492
1302	chr4:9094450-9108450	0	0.0941697	0.060112	0.0660183	0.0327774	0.0821675	0	0.063945	0	0.0619754	0.0305601	0.035907	0.00834225	1.22035	1.29773	1.32185	0.0419787	0.204142	0.0607137	0.0434589	0	0.195459	0.0884235	0	0	0.0977066	0	0	0	0.0651586	0	0	0	0.0335239	0.0513639	0.0883005	0.0886227	0.093141	0.0552904	0.0607339	0.104693	0.0561508	0	0.0381381	0.0353648	0.070694	0.11896	0.0481765
5446	chrX:65437711-65442396	0.189009	0.281364	0	0.0657506	0.0979334	0.327337	0	0	0	0	0.182617	0.0536421	0	0	0.189142	0.0526598	0	0	0	0.194772	0.0490837	0.097333	0	0	0	0.0973104	0	0.274474	0.136334	0.194683	0	0.123693	0	0	0.0767335	0.0527655	0.26479	0.0927634	0.165199	0.120975	0.062561	0.167769	0.285625	0.0569751	0.422657	0.528055	0	0
646	chr2:108523885-108531469	0.0583848	0.115884	0.0554798	0.0812412	0	0.202228	0.118593	0.15738	0	0	0.0564103	0.0662799	0	0.471478	0	0.0325331	0	0.0628037	0.280176	0	0	0.180396	0.108813	0.0377347	0	0.0601182	0.0633248	0.127177	0.0280756	0	0.117037	0.076417	0.0296443	0.061881	0.189623	0.130394	0.109058	0.0573091	0.0510297	0	0.0386501	0.207295	0.176459	0.0703983	0.195837	0.130493	0.164689	0
1527	chr4:99013445-99021899	0.0523771	0.10396	0.149313	0.109322	0.0542774	0.0907098	0	0.105889	0	0.205255	0.101212	0.0594599	0.0138143	0.0939921	0.0524138	0.0291856	0	0	0	0.251879	0	0	0	0.0677037	0	0.161797	0.113618	0.114091	0	0.107899	0.157491	0.034277	0	0	0	0.116977	0.146754	0	0.137337	0.100572	0.138692	0.185965	0	0.126309	0	0	0.0984953	0.199444
2432	chr7:17414063-17420763	0.132174	0.0655857	0.0627987	0	0	0.17168	0.0671191	0	0	0.258981	0.191556	0.150047	0	0	0.0661333	0.0368249	0	0.0710888	0.317137	0.0908027	0	0.204194	0	0.0427126	0	0.136098	0	0	0	0.612637	0.264952	0.086498	0	0.0700444	0	0	0	0.0648693	0	0	0.262493	0.0586604	0.0665791	0.119528	0.0738908	0.221561	0.0621383	0.0503297
1284	chr4:240028-246321	0.0703604	0.139654	0	0	0	0	0.0714593	0.0474152	0	0.137864	0.203943	0.0399375	0	0.0631318	0.0704098	0.0784124	0	0	0.0675288	0.193349	0	0.0724662	0.131132	0.0454746	0	0.144899	0.0763137	0.0510878	0	0.217418	0.0705213	0.0460457	0	0	0.0571295	0.0392849	0.131427	0.138128	0.122993	0.0900683	0.0931557	0.0624537	0.141769	0	0.157338	0	0	0.160753
700	chr2:146544823-146549792	0	0	0.169342	0	0.0923372	0.0771581	0	0	0	0.174591	0.430455	0.252884	0	0	0	0	0	0.287545	0.256555	0.183642	0	0	0.166065	0.115178	0	0	0	0.0646975	0	0.275338	0.178616	0.116624	0	0.18888	0	0	0	0	0	0	0.117972	0.0790912	0.269304	0	0	0	0	0.067859
679	chr2:129961897-129969685	0.227423	0.112849	0.108053	0.0395567	0	0.049233	0	0.0383145	0	0	0.0549329	0.064544	0	0.204058	0.0568955	0.0633621	0	0	0.109135	0.0390595	0	0	0.264907	0.40421	0.0966026	0.117087	0.184999	0.123846	0.0273403	0.0585624	0.0569856	0.0744156	0.0288679	0.0602603	0.230821	0.158723	0.0531008	0	0.0496932	0.0363904	0.0376378	0	0.229116	0.102832	0	0	0	0.0865989
4100	chr14:31701990-31712213	0.0433146	0.0429861	0	0.090407	0.134658	0.187537	0.131973	0.175136	0	0.0424353	0.125549	0.0245859	0.0114241	0.0388646	0.043345	0.0482715	0	0.0931859	0.124714	0.0595138	0	0.044611	0	0.111979	0	0.178402	0.093959	0.157251	0	0.133845	0.0434137	0.0850386	0	0.0459084	0.0351695	0.120921	0	0.0850331	0.075716	0.110894	0.0286738	0.153788	0	0.339477	0.0484294	0.19362	0.0407266	0.230909
4657	chr19:21620237-21631408	0.0792783	0.157354	0.0753337	0.0827356	0.0821546	0.0343247	0.120775	0.0534249	0	0.0776689	0.0382986	0.0449994	0	0.0711335	0.0396669	0.0220877	0	0.0426393	0.0380439	0.0272319	0.226465	0.489906	0.406319	0.461145	0.0168376	0	0.128979	0.0863444	0	0	0.119189	0.0518818	0.0603792	0.126039	0.0643704	0.0663961	0	0	0.0346456	0.025371	0.0262407	0.140739	0	0.0716932	0.17728	0.354381	0.708144	0
4731	chr19:42446147-42453306	0	0.184144	0.0587729	0.129095	0	0.0535581	0.188449	0.0416804	0.0890497	0.181784	0.119517	0.0351071	0.0326257	0.332976	0	0.0689285	0.738783	0	0	0	0.0321238	0.191104	0.0576358	0.0399745	0	0.127373	0.134167	0.0898175	0.297421	0.063707	0	0.121429	0.0942118	0	0	0.1036	0	0	0.378411	0.237524	0.0409443	0.0548999	0.062311	0.074577	0	0.0691192	0	0.0942065
5459	chrX:69697028-69703830	0.195288	0.129205	0.185571	0.0905798	0	0	0.0661128	0	0	0.0637746	0.0628947	0.0369494	0.15452	0.175225	0	0.181364	0.115193	0.070023	0.249905	0.0447206	0.0338095	0.201133	0	0.0841445	0.0276509	0.201086	0.141208	0.236327	0.0313029	0.201151	0.13049	0.0426006	0.16526	0.0689942	0	0.181728	0.121594	0.38338	0.113791	0.291653	0.0861858	0	0	0.0784905	0	0	0	0.0495751
790	chr2:202498632-202504187	0.0797064	0	0.0757405	0.0554549	0	0.27608	0	0.0537134	0	0.0780883	0	0.0904848	0	0.143035	0.0797623	0.0888279	0.0705235	0.0857391	0	0.0547578	0	0.0820919	0	0.051515	0	0	0.0864504	0.0578738	0	0	0.239666	0.104324	0.0404702	0	0	0.0890062	0.0744424	0.156476	0.208996	0.102032	0.0527648	0.141499	0	0.144161	0	0	0.074944	0.182105
2912	chr8:97827598-97835617	0.055218	0.0547992	0.157412	0.0768347	0.0572214	0.0478149	0.168241	0.111633	0	0.162291	0.0533507	0.12537	0	0.148635	0.110513	0.0307686	0	0.0593973	0.0529958	0.0379345	0.0286791	0.0568706	0	0.035688	0	0	0.0598901	0.120279	0.238975	0.113751	0.0553443	0.180681	0	0.117049	0.0448346	0.0616606	0.103143	0.162602	0.144786	0.176711	0.0365537	0.147039	0.333775	0.0998699	0.0617384	0.123415	0	0.0841046
3126	chr9:100363123-100367718	0.289066	0.0956244	0.091561	0	0.299553	0.0834369	0	0.0649329	0	0.0943992	0.0930967	0	0	0	0.289268	0.053691	0	0.103648	0.0924775	0.198586	0	0.297717	0	0	0	0.099216	0	0.209887	0	0.0992477	0	0.0630574	0	0.102125	0.234708	0.107598	0	0.0945799	0.0842168	0.123344	0.255144	0.171055	0.194146	0.0580908	0	0	0	0
4658	chr19:21602971-21612442	0	0.324792	0.0444272	0.0650564	0.0484497	0.0809704	0.0474836	0.0630134	0	0	0.180689	0	0	0.0419501	0.0467862	0.0260519	0	0	0.0448719	0.128477	0.0971309	0.433374	0.609946	0.21152	0.0198595	0	0.0507093	0	0	0.0963139	0	0	0.0949545	0	0.0379617	0.0261042	0.0436658	0.091784	0	0.059849	0.0309503	0.0414995	0.0471016	0	0.888663	0.417984	0.57148	0
4595	chr19:5852219-5857669	0	0	0.154399	0.113046	0.252568	0	0.0825106	0.164244	0	0.159185	0.0784943	0.138342	0	0.0728952	0.0812987	0.0905389	0	0.0873906	0.467833	0.0558126	0	0.0836732	0.151412	0	0	0.0836538	0	0.176966	0.0390668	0.167361	0.0814275	0.106333	0	0.0861067	0	0.0453603	0	0	0	0.155996	0.0537811	0	0	0.0489792	0	0	0.0763876	0.0618711
2964	chr8:131820835-131826284	0.0812566	0.0806404	0.0772136	0	0.0842047	0.0703625	0.165051	0	0	0.0796071	0	0.0461223	0	0.145817	0.0813136	0.0905556	0.0359476	0.0874067	0.23396	0	0	0.167377	0	0.105034	0.276124	0.0836691	0.0881319	0.0589994	0	0	0.0814424	0.106353	0	0	0	0.181475	0.0758903	0.239278	0.213061	0.0520083	0.053791	0.144251	0.0818617	0.0979763	0	0	0.0764016	0.0618824
6195	chr1:221947781-221958635	0	0	0.116301	0.0567678	0.0845538	0.0353271	0	0.0549851	0	0.0799371	0.27592	0.138941	0	0.292843	0.163301	0.159129	0	0.0438845	0	0.0840813	0.021189	0.0840355	0.0760336	0.0263673	0	0	0	0	0	0.0420214	0.08178	0	0	0.0864795	0.0993754	0.0683351	0.114307	0.0800901	0.0356573	0.0261119	0.054014	0.0362122	0.0411006	0.0491913	0.182457	0.273548	0.115078	0.062139
3333	chr10:95719499-95722670	0	0.138553	0.132665	0	0.144677	0	0	0	0.0402015	0.273555	0	0.0792455	0	0	0	0	0	0.450536	0	0	0	0.14379	0	0	0	0	0	0	0	0	0	0	0	0	0	0	0.130392	0.411118	0.122024	0	0	0.371769	0.140651	0.168339	0	0.156019	0.26254	0.212648
4465	chr17:50412688-50420267	0	0.0579802	0.0555164	0	0.060543	0.252952	0.178007	0.196855	0	0.343424	0.112895	0.165809	0	0.052421	0.116929	0	0.0258462	0.0628452	0.112144	0.321092	0.0303438	0	0.163327	0.151038	0	0.120316	0	0	0	0.0601771	0.351341	0.114701	0	0.123844	0.0948742	0.0326199	0.0545649	0.0573469	0	0.0373938	0.193378	0.155574	0.294292	0.0704447	0.0653222	0.0652894	0	0.0444933
2865	chr8:78183500-78187877	0.101153	0	0	0.140752	0.104823	0.0875915	0.102733	0	0	0.0990997	0.0977324	0.114832	0	0.090761	0.202448	0.112729	0	0.108809	0.0970824	0.208475	0	0	0.0942605	0.0653763	0	0	0.109712	0.073446	0	0.10419	0.101384	0.132395	0	0	0.164264	0	0.188946	0.0992895	0.353641	0	0.0669623	0	0.101906	0.0609835	0.113098	0.113041	0.0951094	0
5397	chrX:56024197-56032063	0	0.167595	0	0.156658	0.0583343	0	0	0.151738	0	0	0.108777	0.191712	0	0.151526	0.0563314	0.125468	0	0	0.0540265	0.232033	0.0877105	0.0579767	0.209824	0.109146	0	0.289816	0.0610549	0.245237	0.0270692	0	0.282103	0.0368389	0	0.0596629	0.182826	0.15715	0	0	0	0.108089	0.149059	0.0999322	0.113422	0.13575	0.0629392	0	0.105857	0.12861
2452	chr7:30480038-30484204	0	0.105469	0.100987	0.0739398	0.110131	0	0.107935	0.0716178	0	0.104118	0.102681	0.0603232	0	0.0953567	0	0.0592186	0	0.114319	0	0.146021	0	0.109456	0	0.137373	0	0	0	0.077165	0	0.109465	0	0	0	0.225278	0.258872	0.178012	0.0992566	0	0.185774	0.136043	0.070353	0.188665	0	0.128143	0.118825	0.118765	0.0999254	0.0809358
5110	chrY:13435167-13443256	0	0	0	0	0	0	0	0	0	0	0	0	0	0.196466	0.109557	0.335526	0	0	0	0	0	0.169136	0.10202	0.212275	0	0.169096	0.118744	0.278223	0	0	0	0	0	0	0	0	0	0	0	0	0	0	0	0	0	0	0	0.208442
2015	chr5:151242363-151251256	0.0497918	0.148243	0.0473144	0.103926	0.206393	0.215581	0.0505695	0.134217	0	0.146343	0	0.11305	0	0.223382	0.0996535	0.138725	0	0.107121	0.143364	0.0342067	0	0.051282	0.046399	0.0965429	0	0.0512701	0.10801	0.0723064	0	0.102573	0.149717	0.0977552	0	0.0527735	0.0404287	0.0556013	0.093007	0.0488744	0.174077	0.191215	0	0.265179	0	0.0300186	0	0.0556435	0.140451	0.11376
927	chr3:39343715-39353493	0	0.0898844	0	0.0630141	0.328501	0.117643	0	0.152588	0.0260802	0.266198	0.218771	0.0771142	0	0.162533	0.135952	0.0252341	0	0.0487132	0.0869264	0.093333	0.0470408	0.093282	0.0843997	0.0292686	0	0.0466302	0.0982347	0.098644	0	0.139935	0.0907784	0.0296361	0	0	0.0367699	0.101139	0.0422949	0.0444513	0.0791615	0.0579702	0.0599572	0.0401967	0.0456229	0.109208	0.202533	0.101216	0.12774	0.0344881
3751	chr12:31937073-31944995	0.0558941	0.0554701	0.212452	0.194438	0	0.0484003	0.170301	0.112999	0	0.383316	0.0540038	0.0317262	0	0.0501517	0.111866	0	0	0.0601245	0	0.0383989	0	0.0575669	0.208341	0.0361249	0	0	0.484987	0.0811679	0	0	0.0560219	0	0	0.0592412	0.0453835	0.0312078	0	0.164593	0	0.035775	0.111004	0.198452	0	0.13479	0.124989	0.0624629	0	0.0425671
4752	chr19:50347458-50350184	0.162394	0	0.154314	0.225968	0.168286	0.140622	0.16493	0.218872	0	0.159097	0.313805	0.092177	0	0.29142	0.162508	0	0	0	0	0	0	0	0	0	0	0	0.176134	0	0	0.167269	0	0	0.0824541	0	0.131857	0	0	0	0.141936	0	0.215006	0	0	0.195809	0.18157	0	0	0.247348
3551	chr11:77569937-77574938	0	0	0	0.123194	0.183493	0	0.089917	0.0596624	0	0.086737	0.0855403	0.100506	0	0.0794385	0.0885964	0.147999	0	0.0952352	0	0.0608225	0	0.091184	0	0.114441	0	0	0.288076	0	0	0	0.0887367	0	0	0.187672	0.0718859	0.148296	0.0826873	0.0869031	0	0.0566663	0.117217	0	0.178387	0.106752	0	0.197878	0.0832445	0.0674249
607	chr2:89050190-89057157	0	0	0.120785	0	0.131721	0.165102	0	0.0856577	0	0	0.0614053	0.180372	0	0	0.127198	0.0708278	0	0.13673	0	0.0436616	0	0	0.177672	0.123228	0	0.130883	0.137864	0.138439	0	0	0.1274	0.0831836	0.129077	0.0673605	0.0516035	0.0709699	0.0593574	0.124767	0.111097	0.0406781	0.0841449	0.112825	0.128056	0.0766319	0	0.142047	0.119515	0.0484012
6211	chr1:227589718-227596629	0.128139	0.254334	0.121763	0.0891514	0.199182	0.221919	0.13014	0.474934	0	0.251076	0.0619028	0	0	0.172462	0	0	0	0.137837	0.0614911	0.0440154	0	0.065987	0.119407	0.0414088	0	0	0.0694905	0.0930401	0	0	0	0.209644	0	0	0.156065	0.0357724	0.0598383	0.125778	0	0.0410077	0.12724	0	0.0645467	0.115879	0.14327	0.214797	0	0.0975866
3335	chr10:97555739-97561771	0.0734044	0.291391	0.139504	0.153211	0.0760676	0	0	0.0494665	0	0.143828	0	0.0416653	0	0.065863	0.0734558	0.0818047	0	0.0789601	0	0.151285	0	0.0756013	0.27361	0	0	0.0755837	0.0796152	0.106596	0	0	0.147144	0	0	0	0.238404	0.163938	0	0.144104	0	0.140947	0	0.195467	0.147902	0.132763	0	0	0.0690186	0.111805
6206	chr1:225791235-225801134	0.0447322	0.0887858	0.127519	0.0622439	0	0	0.0908616	0.0602892	0	0.131472	0.0432194	0.101562	0	0.0401365	0.0447635	0.0747769	0	0.144353	0.085864	0.0614615	0	0.046071	0.0416841	0	0	0.138181	0	0.0649589	0	0.09215	0.134503	0.117096	0	0.0474109	0.108962	0.0499513	0.041778	0.043908	0.117291	0.0858924	0.0888367	0.119116	0.135196	0	0	0.149968	0.084119	0.0681332
1916	chr5:99012118-99016954	0.183109	0.36344	0.173998	0	0	0	0.185969	0.0616977	0	0	0.176916	0.0519675	0	0	0.0916186	0	0	0.196968	0.26361	0	0	0	0	0.0591725	0	0	0.397204	0	0	0.0943028	0.0917637	0	0	0.0970369	0	0	0.085508	0	0	0.117199	0.060608	0.243798	0	0.0551965	0.102366	0.306942	0.172168	0
3058	chr9:40310106-40316283	0.358408	0.213414	0	0.0498717	0	0	0	0	0	0	0	0	0	0	0	0	0	0.0771069	0.137594	0	0	0.147654	0.333985	0.0463285	0	0.0738097	0	0	0	0.147667	0	0	0.0363956	0.303896	0.116404	0.200113	0	0	0	0.0458797	0.0474524	0	0	0.0432155	0	0.240317	0.202196	0.163771
4776	chr19:53359490-53365214	0	0	0	0.161454	0	0.0669827	0.314246	0.104256	0	0.0757832	0	0.0878137	0	0	0.0774077	0.0431029	0	0.0832081	0.148481	0.0531414	0	0	0.0720825	0	0	0.0796501	0.167797	0	0	0.159351	0.0775303	0.101244	0	0	0.125615	0.0863787	0	0	0.135218	0.14853	0.256036	0	0.155859	0.0932701	0.172975	0	0	0.11782
1260	chr3:185562561-185571587	0.0981164	0.146058	0.0466173	0.102395	0.0508381	0	0.149473	0.0661198	0	0.0480623	0.142198	0.0278461	0	0.0440181	0	0.136681	0	0.0527713	0.0941678	0.134811	0	0.0505265	0.137146	0.0317068	0	0	0	0.0356205	0	0.0505309	0	0.032105	0	0.155988	0.199165	0.0821732	0.0458183	0.144463	0.0857562	0.0627994	0.129904	0.0435453	0.0988471	0.088729	0.109703	0	0.276762	0.0747223
3309	chr10:84525438-84531069	0.0786308	0.0780344	0.0747184	0	0	0.0680887	0	0.0529886	0	0.154069	0	0.178527	0	0.0705525	0.0786859	0	0	0.0845821	0.226399	0.0540189	0	0.161968	0	0.0508198	0.0334001	0.0809653	0.170568	0	0	0.242974	0	0.25729	0	0.0833394	0.191534	0.17561	0.146876	0	0.343626	0.100655	0.208211	0	0.0792164	0.142215	0.175832	0.0878717	0.0739327	0.0598827
4605	chr19:9453926-9462365	0.209881	0.156217	0.099719	0.109517	0.0543739	0.181742	0.106579	0.282873	0	0	0.0506958	0.0595656	0.0276777	0.0941591	0	0.0292374	0	0.169325	0.151076	0.0360467	0	0	0.0977896	0.101736	0	0	0	0	0.0252314	0.0540453	0.10518	0	0	0.0556123	0.170414	0.0292961	0.147015	0	0.0458602	0	0.0694694	0	0.052861	0.0316334	0.0586661	0.117273	0.246676	0
1104	chr3:126093177-126102115	0	0.0491654	0	0.0344677	0.102677	0.0428992	0.0503149	0.133541	0	0.097071	0.0957316	0.0281202	0	0.133354	0.0991518	0.0552106	0	0.159872	0.0475474	0.102103	0.0514613	0.102048	0.0461654	0.0960568	0	0.153036	0	0.0359712	0	0	0.0993089	0.194526	0	0.105016	0.201126	0.0276607	0.0925388	0.0486284	0.173201	0.0634176	0.0983872	0.263844	0	0.268807	0	0.110727	0	0.0754579
985	chr3:75551278-75559986	0.101699	0	0	0.070756	0.158083	0.176129	0.258219	0.034267	0	0.0996346	0	0.173177	0	0	0	0	0	0.0546982	0	0.0698666	0	0.104743	0.0947692	0.0328646	0	0	0	0.0369212	0	0.104752	0	0.133109	0	0.107789	0	0.0567824	0.0474913	0.149738	0	0.0650925	0.0673237	0.225677	0.102456	0.0613126	0.170562	0.170477	0.239057	0.0387254
4307	chr15:88547267-88551061	0.116693	0.231615	0.110886	0	0	0.303143	0.23703	0.157276	0	0	0	0.0662363	0	0.209408	0	0.130047	0	0	0.111996	0	0	0.120185	0	0	0	0.120157	0.379699	0	0	0	0	0	0	0	0.0947492	0	0.217972	0	0	0	0.0772493	0	0	0	0.260945	0.260813	0.10972	0
2748	chr8:20157536-20165620	0.0547741	0.0543587	0	0	0.227045	0.094861	0.111259	0.0369118	0	0.0536622	0.0529218	0.0310905	0	0.0491468	0.109625	0.0610424	0	0.0589198	0.0525698	0.075259	0.056897	0.0564134	0	0	0	0.0564003	0.0594086	0.0397708	0	0	0	0	0.0834331	0.116108	0.400267	0.0305825	0.0511567	0	0	0.0350581	0	0.0972377	0.110364	0.0330223	0.244968	0.183634	0.103003	0.0834284
1466	chr4:74083502-74094041	0	0	0.0399254	0.0876965	0.0870808	0.109149	0.256033	0.113257	0.0120986	0.0411631	0.0405951	0.0715465	0	0.0376994	0.126136	0.0468243	0	0.045196	0.1613	0.0577295	0	0	0.156612	0.081466	0	0.0432634	0.0911421	0.0610145	0	0.0865545	0.168448	0.109985	0.0639997	0	0.102345	0.0469182	0.0784824	0.164967	0.073446	0	0.0556283	0.0372944	0.0846578	0.0506614	0.0939549	0.0469538	0	0.031998
574	chr2:73687664-73699895	0.108612	0.071859	0.103208	0.0503772	0.0750353	0.0313502	0.110309	0.0731928	0	0.106407	0.0699595	0.10275	0.00954871	0.0974538	0.0362295	0.0403473	0.0160165	0.155777	0.0347471	0.074616	0	0.0745753	0	0.0467981	0	0.074558	0.0392674	0.105149	0	0.0745818	0.0362869	0.0473858	0	0.0767442	0.146981	0.0404282	0.101439	0.106611	0.18986	0.0926897	0.215701	0.0321357	0.0364737	0.0436536	0.121438	0.0404589	0.136164	0.110288
4511	chr18:13700699-13707821	0	0.0617001	0	0.0865105	0	0.107673	0.0631426	0	0	0.0609095	0	0.105868	0	0.111569	0.0622152	0.0346433	0	0.0668772	0	0.170846	0	0.0640323	0	0	0	0.0640175	0.0674321	0	0	0.192114	0.0623138	0.0406867	0	0	0.100961	0.0694256	0.116131	0.183078	0.217358	0.0795859	0.164628	0.11037	0.125269	0.262375	0.0695132	0.0694782	0.058457	0.0946959
5442	chrX:65130175-65134926	0.093192	0	0.17711	0.0648374	0.0965732	0	0.189295	0	0	0.0913002	0	0.264485	0.0245791	0	0.0932574	0.207714	0.0412278	0	0.357766	0.0640224	0.193608	0	0	0.0602309	0	0	0	0	0.0448134	0.191979	0.0934051	0.121975	0.283904	0.0987727	0.0756678	0	0.0870375	0.091475	0.0814521	0.0596475	0	0.165439	0	0.168551	0	0	0.175248	0.141944
1157	chr3:146407146-146411603	0	0	0	0	0.411768	0.172039	0	0	0	0	0	0	0	0	0.198815	0.166059	0	0	0.19068	0.0682446	0	0.204622	0	0	0	0.204575	0.107743	0.288512	0	0.10232	0	0.0650093	0	0.210573	0.080658	0.0554641	0	0	0	0.127162	0.263043	0.264524	0	0.239556	0.222137	0.111012	0	0
468	chr2:8893542-8903195	0.045872	0	0.0435896	0	0	0	0.0465885	0	0	0	0.0443207	0.0781127	0	0.123478	0.0918084	0.204486	0	0.0493439	0	0.0945414	0.023825	0.0472449	0.0427463	0.11859	0	0.0944679	0.0995067	0.133228	0	0.0472491	0.0459769	0.0600397	0.0232911	0	0.0744921	0.0256121	0.17137	0.225134	0.0801865	0.0587208	0.121467	0	0.0462136	0.193588	0	0.051263	0	0.0698693
5477	chrX:73655975-73666201	0	0	0.0822948	0	0.0897459	0.0749928	0.0879564	0.0875423	0	0.0848457	0	0.0245787	0	0.0388532	0.129997	0.0965147	0	0	0.0415593	0.0594963	0.0224901	0	0	0.0559729	0	0.0445875	0.140897	0.0628819	0.0832907	0.0892036	0.0434009	0.226703	0	0.0917899	0	0.16924	0.202211	0.0425041	0.0756938	0.194008	0.0573308	0.0768717	0.130873	0.261059	0.0968304	0.0967817	0.0814293	0.0659547
3118	chr9:97214681-97220761	0.072825	0.144545	0.138403	0	0.226401	0.0630613	0	0.0490761	0	0	0.281449	0.0413364	0	0.196029	0.218628	0.121738	0	0	0	0	0	0	0.0678626	0.0470675	0	0.149974	0.0789868	0	0	0.150022	0.437949	0.0953171	0	0	0.118261	0.243966	0.0680155	0	0.127302	0	0	0	0	0.0439049	0.0814245	0.162767	0.0684738	0
5302	chrX:12939865-12947330	0.118631	0.117731	0.112728	0.041268	0.0614674	0.051363	0	0.0399721	0	0	0.0573095	0.0336682	0	0.319329	0	0.0661034	0	0	0.113857	0	0	0.0610906	0.165821	0	0	0	0.193002	0.0430681	0	0.061096	0	0.0388175	0.0301168	0.0628674	0.0481614	0.066236	0	0.174668	0.103686	0.0759296	0.0392661	0.315899	0.119514	0.0357602	0	0.0662863	0.334628	0
877	chr3:19481980-19490450	0	0	0	0	0	0.226346	0	0.0704596	0	0.153651	0.0505103	0.0890214	0	0.0469073	0.0523148	0.0291304	0	0.11247	0	0.215489	0	0.107686	0	0.0337879	0	0	0	0.075917	0	0.0538475	0.0523977	0	0.0265438	0.166226	0.254685	0.204322	0.0488257	0.10263	0	0	0.103823	0.13921	0.158003	0.157588	0.175354	0.116844	0.0491546	0.0398134
5202	chrY:21020988-21028812	0	0	0	0	0	0	0	0	0	0	0	0	0.0149265	0.253899	0	0.252283	0	0	0	0	0.176362	0.0582878	0.263688	0.365773	0	0.466195	0	0.205461	0	0	0	0	0	0	0	0	0	0	0	0	0	0	0	0	0	0	0	0.0431002
5481	chrX:74168249-74182990	0.0300399	0.0596242	0.228362	0.0626999	0.0622596	0.0520249	0.0610182	0.101218	0.0173001	0.0588602	0.232192	0.0682042	0.0396147	0.0539074	0.030061	0.0334777	0.119606	0.0323136	0.028831	0.0412745	0.202827	0	0	0.0194151	0.0510404	0.0618636	0.0325816	0.0872464	0.158899	0.0618834	0	0.0786356	0.198282	0.127355	0.0731732	0.0503173	0.028056	0.0294864	0.0262556	0.0769082	0.0198861	0.106657	0.0302636	0.0905527	0.0335872	0.0335703	0.141225	0.0915098
2131	chr6:42893647-42903472	0	0	0.0428266	0.0313563	0.0934084	0	0.045773	0.0607432	0	0	0	0.0255818	0	0.0404388	0	0	0	0	0	0.0309622	0	0.0464179	0	0	0	0.0464071	0	0	0	0	0.135516	0	0	0.0477679	0	0.0251638	0	0.0442387	0.0393914	0.0865393	0	0	0.181619	0.0271713	0.554301	1.05768	1.35604	0.102969
5200	chrY:20896630-20905731	0	0	0	0	0	0	0	0	0	0	0	0	0	0.218277	0.0486881	0.0542219	0	0	0	0	0	0.300661	0.226693	0.0628911	0	0.450887	0.263853	0.529905	0	0	0	0	0	0	0	0	0	0	0	0	0	0	0	0	0	0	0	0.11116
5445	chrX:65361890-65365179	0.134604	0.133584	0	0	0.139488	0.233116	0.136707	0	0	0	0.130052	0	0	0.120776	0.134699	0.150008	0	0.144792	0.129187	0.277417	0	0	0	0	0	0	0	0.0977345	0	0.138645	0	0.0880886	0	0.142665	0	0	0	0	0.352943	0.0861535	0	0	0.135607	0.0811506	0	0	0	0
5717	chrX:136923426-136936654	0.100427	0.0664434	0.06362	0.0698709	0.0693803	0.144938	0.135994	0.0451178	0	0	0.0970306	0.0570036	0	0.120146	0.0334991	0.167879	0.0148095	0.144037	0.0321284	0.0229975	0.069546	0.0344775	0.0311945	0.0216356	0	0.103408	0	0.121531	0	0.137922	0.134209	0.0657219	0.0339938	0.0354802	0.0815421	0.0186907	0.0937944	0.0985764	0.146292	0.149982	0.0664814	0.0891413	0.168624	0.0605455	0.0374286	0	0.0629509	0.0509879
5345	chrX:37478342-37484837	0.136345	0.0676555	0.259122	0	0.0706459	0.0590326	0.138474	0	0	0.133577	0.197601	0.116087	0	0.122337	0.136441	0.113961	0	0	0	0	0	0.0702128	0.381163	0.0881211	0	0.140393	0.0739407	0.197997	0	0	0	0	0	0.0722549	0.276765	0.11419	0.0636703	0	0	0.0872676	0	0.0605116	0	0	0.0762226	0	0.0640993	0
797	chr2:208386088-208393926	0.112986	0.112129	0.0536821	0.0393044	0	0.048919	0	0.0761402	0	0	0.0545825	0.0320662	0	0	0.169598	0.031479	0	0.0607688	0.216878	0.116431	0	0.174551	0.15793	0.292096	0	0.0581703	0	0.123056	0	0	0.0566222	0.0369705	0	0	0.0458698	0.157711	0.158286	0	0.0493762	0.0361583	0	0.0501446	0	0.0681172	0	0.252529	0.106235	0
5882	chr1:48208956-48214821	0	0	0	0	0.0782332	0.196118	0.0766732	0	0	0	0.0729411	0.0428515	0	0.135476	0.0755471	0.0420668	0	0	0.0724559	0	0.0784201	0.233261	0.0703499	0	0	0.155471	0	0.109631	0	0.0777604	0	0.0494053	0.0383314	0.16003	0.122596	0.0421512	0	0	0	0	0.0499763	0	0.0760563	0	0.168818	0.168733	0.141967	0.114988
6022	chr1:114363331-114369602	0	0	0.0670941	0	0.146338	0.0611409	0	0	0	0	0.136439	0	0.148979	0	0.282627	0	0.0312363	0	0	0.0970135	0	0	0	0	0	0.145407	0.0765814	0.102534	0	0.145454	0.141537	0.231036	0.107551	0	0.0573299	0.0394227	0.0659442	0.0693063	0.0617124	0.0451921	0.0934825	0.188018	0	0.212839	0	0	0.0663885	0.107544
876	chr3:17774297-17782098	0	0.0563304	0.0539367	0.0789816	0	0	0	0.114752	0	0	0.0548414	0.0644365	0.119764	0.101859	0.227203	0.0316283	0	0.244228	0	0.0389944	0.0589608	0.0584597	0	0.0733703	0	0.116892	0	0.0412134	0.191063	0	0	0.0371458	0.0864595	0	0.0460873	0.0950753	0.106025	0.22286	0.148831	0.0726596	0	0	0.114367	0.0684403	0.126927	0.0634316	0.0533695	0.0432273
3513	chr11:61093578-61099813	0	0.140953	0.0674814	0	0.0735914	0.0614939	0	0.0957125	0	0.20872	0.0686133	0.120927	0	0.127438	0.142129	0.0395709	0	0	0.204471	0.0487868	0	0.0731402	0.198527	0	0	0.21937	0.0770235	0	0	0.146293	0	0.046474	0	0	0.0576609	0.0793005	0.0663249	0.139413	0.186206	0.0909061	0	0.0630345	0.143087	0.128441	0	0	0	0.216331
3055	chr9:35582348-35587799	0.0812268	0.241832	0.0771853	0.0565127	0.0841738	0.140673	0.164991	0.109476	0	0	0.0784799	0.0922108	0	0.145764	0.162568	0.181045	0	0.0873746	0	0.0558023	0	0.0836578	0	0.0524977	0	0.0836384	0.0880995	0.117955	0	0.0836652	0.0814125	0.0531569	0	0	0.131905	0.045352	0	0.15946	0.0709942	0	0	0	0	0.146911	0	0.0907728	0	0.185579
1113	chr3:128959811-128965383	0.0794632	0	0.0755095	0.0552857	0	0.0688096	0	0.107099	0	0.1557	0.076776	0	0	0.712994	0.0795189	0.0442785	0	0	0.0762653	0	0.0412715	0	0.0740485	0	0	0	0	0.0576972	0	0.163697	0.31858	0.156008	0.0403467	0.336887	0.129041	0.354939	0	0.0779991	0	0	0.0526038	0.0705335	0	0.143721	0.0888466	0	0	0.121033
6229	chr1:236926867-236938803	0.148395	0.220905	0.0352529	0.0774333	0.0768896	0.0963749	0.0376782	0.0250005	0.0106827	0.109037	0.0716884	0.0631733	0	0.0998622	0.185624	0.103361	0.0656494	0.0798134	0.284846	0.127433	0	0.0382091	0.0345709	0	0	0.0382003	0.120713	0.161622	0.0178398	0.076425	0.0743673	0	0	0.117961	0.240981	0.062141	0	0	0.0324253	0.0237451	0.024559	0	0.0373751	0.134197	0.0829593	0.0829175	0.0348822	0.0282533
4259	chr15:42884920-42890353	0	0.161756	0.077441	0.1701	0.168905	0	0.248306	0.0549193	0	0.239524	0.23622	0	0.0859771	0.0731232	0.163106	0	0	0	0.0782161	0.0559872	0	0	0.0759426	0.210686	0	0	0.0883914	0	0	0	0.0816822	0	0.206894	0	0.066171	0	0.0761137	0	0	0	0.107899	0	0.164206	0.0491324	0	0.182147	0	0.0620646
4067	chr14:20700825-20707674	0.0646494	0	0	0	0.066995	0	0	0.0435666	0	0.126674	0.0624631	0.110088	0	0.0580075	0.0646948	0.0360239	0	0.0695425	0.186143	0.133241	0.100733	0	0.0602441	0.125351	0	0.133138	0.140239	0.0469411	0	0.13318	0	0	0	0.137042	0.0524924	0.0360962	0.18114	0	0	0	0	0	0.0651309	0	0.0722835	0.144494	0	0.0492349
2294	chr6:114010996-114018008	0.18944	0.0626679	0.0600049	0.0439337	0	0.109361	0.064133	0.0851081	0.254566	0.12373	0.0610113	0	0	0.169978	0.189573	0.0703733	0	0.271705	0.0606055	0.0433815	0	0	0.235376	0.0408124	0	0.0650216	0.13698	0.0458501	0	0	0.126582	0	0	0	0	0.105772	0	0.18595	0	0.0808342	0.083605	0.112101	0	0	0	0.070568	0.0593739	0
5858	chr1:35141422-35146772	0.08276	0.0821323	0.314569	0.115159	0.0857626	0	0.0840525	0.111542	0	0.0810799	0	0.140927	0	0.0742574	0.082818	0.138346	0	0.0890238	0.158859	0.0568556	0	0.0852369	0	0.213954	0	0	0.0897624	0.0600909	0.159188	0	0.0829492	0	0	0	0	0.092416	0.0772944	0	0	0.0529705	0	0.0734598	0.0833763	0	0.370131	0.184972	0.0778152	0
921	chr3:37205388-37210420	0.087989	0.0873217	0.334444	0	0.0911813	0.0761923	0.0893632	0.11859	0	0	0.0850134	0	0	0.236848	0.0880507	0.0490292	0	0.0946486	0.168896	0.120896	0	0	0.0819933	0.113736	0	0.0906014	0.0954339	0.0638877	0.0423114	0	0.0881902	0	0.0893512	0	0.142886	0.0982552	0.164356	0.172736	0.0769045	0	0	0	0	0	0	0	0.165464	0
2914	chr8:99943682-99949604	0.0747676	0.445203	0.213142	0.156056	0.0774803	0.129487	0.0759353	0	0	0.0732498	0	0	0	0	0.07482	0.041662	0	0.160853	0	0.10273	0	0.154011	0	0	0	0.153975	0	0	0	0.231036	0	0.0978597	0.0379626	0.237735	0	0.166982	0.0698298	0.22017	0.0653487	0.047855	0.0989907	0	0	0.0901521	0	0.0835545	0	0.0569406
1225	chr3:167422682-167431167	0	0.10358	0	0	0.0540792	0.135568	0	0.0351675	0	0.102253	0.050421	0.0296213	0	0.0468244	0.0522224	0.0290789	0	0.168407	0.100171	0.107554	0	0.161243	0.0972596	0.0674564	0	0.0537352	0.0566013	0.0757828	0	0.107505	0	0.0341517	0	0	0	0.0582746	0	0	0	0	0.0345464	0.0926428	0	0	0.175044	0.174956	0.245339	0.039743
597	chr2:83873933-83879494	0.0796204	0	0.0756588	0	0	0	0	0.107311	0	0	0.384639	0	0	0	0	0	0	0.25694	0.152832	0.0546987	0	0	0.074195	0.154378	0	0.0819843	0	0.0578113	0	0	0.159605	0.0521056	0	0.168777	0	0.0444551	0	0.0781534	0.13918	0	0.0527078	0	0	0.0480017	0	0	0	0.0606363
6122	chr1:181246197-181255342	0.14526	0.144158	0.0920215	0.0336876	0.0501767	0	0.147528	0.163149	0	0	0.0467825	0.0549676	0	0.217227	0.387631	0.161883	0	0	0	0.0332642	0	0.0498691	0	0.156471	0.0411348	0.099715	0.15755	0.140628	0	0	0	0	0	0	0	0.0540693	0.0452222	0.0950556	0.0846404	0	0.0641069	0.128936	0	0.0875745	0	0.0541104	0.0455269	0.0368751
3883	chr12:95749008-95757677	0.102157	0.152073	0	0.0710743	0.0529315	0.0442302	0.051876	0.0688423	0	0.150124	0.0493509	0.0289927	0	0	0.0511141	0.0569236	0.0451936	0.0549442	0.0490227	0.0701809	0.106116	0.105214	0.0951955	0.0660248	0	0.0525948	0	0.111262	0	0.210446	0	0.100281	0	0.108274	0	0.0570379	0	0.150412	0.178575	0.0326926	0.0338133	0.0453383	0	0.153971	0	0.0570811	0.0480264	0.0388996
5479	chrX:73801458-73809385	0.0558588	0.0554352	0.0530795	0.0777263	0	0.145109	0	0.0376427	0	0.273624	0.0539698	0.190237	0	0	0	0	0	0.300433	0.214443	0.0767493	0	0.0575306	0	0	0	0	0	0	0	0.345214	0.111973	0.182777	0	0.118408	0.0453549	0.124752	0.208679	0.0548296	0.195288	0.0357524	0.147912	0.198327	0.0562748	0.168381	0.0624549	0.124847	0	0
4621	chr19:12098326-12104292	0.148433	0	0	0	0	0.128532	0	0.0500137	0	0.0727097	0.143413	0	0	0.133183	0.222805	0.0413548	0	0	0	0.101972	0	0	0.0691591	0.0479667	0	0.0764197	0.0804958	0.161662	0	0.0764442	0	0.194276	0	0	0.180781	0.0414378	0.207945	0.0728489	0	0	0.147391	0.0658762	0.149538	0.0894874	0	0.165877	0.209346	0.0565207
3946	chr13:37965980-37975592	0.0460677	0	0.0437755	0.0320511	0.190956	0.119674	0.0935743	0.0620892	0	0.0451325	0.0890195	0.0261486	0	0.0826696	0.1844	0.0256698	0	0.0495544	0.176855	0.0316482	0	0.0948928	0.0858571	0	0	0.0474354	0.0499655	0.0668983	0	0.0474506	0	0.0602958	0	0.0488263	0.187024	0.077164	0	0.135657	0.0402643	0.0589712	0	0.0817816	0.0464107	0	0	0	0	0.0701673
6212	chr1:227618386-227631143	0.0347114	0.0344482	0.098953	0.0483002	0.0359708	0.090173	0.105761	0.116959	0	0	0.234763	0.0394053	0.00915503	0.0311453	0.0694716	0.0967095	0	0	0.133258	0.0238466	0	0	0.0646923	0.112172	0.0442333	0.142968	0.0376484	0.0252035	0	0	0.0347908	0.0681482	0.0176244	0.0367901	0.0281841	0.0581421	0.0648381	0.0340719	0.0303386	0.0666511	0.0459572	0.0924322	0.0699399	0.125561	0	0	0.195825	0.10574
890	chr3:21189011-21194217	0	0	0	0	0.176269	0.368231	0.086377	0.0573135	0	0.333289	0.246518	0.0965495	0	0	0	0	0.0752504	0	0	0	0.132517	0	0	0	0	0.0875738	0.18449	0	0	0.0876018	0	0	0.0863654	0.180283	0.138111	0.0474859	0	0	0	0.0544354	0	0	0	0	0	0	0	0.0647704
3788	chr12:48109293-48115444	0	0.214316	0.0684028	0.100165	0.0745962	0.187001	0	0.0970194	0	0	0	0.0408593	0	0	0.072035	0.0401112	0	0.154866	0.138175	0.0989058	0	0.0741389	0.0670794	0.0930486	0.0611539	0	0	0.104534	0	0.222436	0.0721491	0	0.0365495	0	0.116896	0.0401917	0.0672305	0.0706582	0	0.0460736	0.0953059	0.0638952	0	0.130195	0	0	0	0.0548211
2078	chr6:14294643-14302844	0	0.107167	0	0	0	0.0467539	0.164508	0.0363852	0	0.105793	0.0521668	0.030647	0.0996829	0.145337	0.108061	0.0300858	0	0	0.10364	0.111278	0	0	0.100627	0.0697921	0	0	0	0.0392034	0	0.166841	0	0.0353343	0	0.114452	0.131519	0.0602924	0.100854	0.052998	0.047191	0.0691161	0.0714852	0.0958506	0	0.0651025	0.120737	0.0603381	0	0
1767	chr5:18666945-18676153	0	0.047724	0.045696	0	0.0996668	0.124924	0	0.0324065	0	0.18845	0.0464624	0	0	0.129445	0.144367	0	0	0.0517283	0.0461534	0.0660733	0	0.148584	0.0448118	0	0	0.0495164	0.0521575	0.0698331	0	0	0.0481986	0.0944114	0	0.101937	0.0780917	0.0268497	0.0449128	0.0472027	0.0420307	0	0.0318342	0.0426847	0.0968936	0.0869754	0.107534	0	0.0904309	0.109868
637	chr2:102906878-102913577	0.132194	0.131191	0	0.0919723	0.0684949	0.343411	0.134258	0.044542	0	0.064755	0.0638616	0	0	0	0.0661431	0.0368304	0	0	0.126874	0.0908162	0	0.068075	0.184779	0.128157	0	0.204178	0	0.143976	0	0	0.132496	0.0865109	0	0.0700549	0.107335	0.147617	0.0617317	0.064879	0.0577702	0.0423052	0	0.0586692	0.066589	0.0398486	0.0739018	0	0	0
550	chr2:62088710-62100497	0	0.0372828	0.107096	0.0784121	0.0389308	0.0650621	0.076309	0.0506331	0.0108177	0.0368051	0	0.127944	0	0.168541	0.0751882	0.041867	0	0.0404111	0.0360559	0.0516176	0	0.0386921	0.0350078	0.0728412	0	0.0386831	0	0.0818323	0	0	0.0376536	0.0491706	0	0.0398174	0	0.0629265	0.0350867	0.147502	0.0985054	0.0240452	0.124347	0.0333461	0.113543	0.113245	0.0420039	0.125948	0.0353231	0.0858312
5205	chrY:21087150-21091916	0	0	0	0	0	0	0	0	0	0	0	0	0	0.166709	0.0929639	0.051765	0	0	0	0	0	0.287037	0.259706	0.0600414	0	0.382628	0.100759	0.337263	0	0	0	0	0	0	0	0	0	0	0	0	0	0	0	0	0	0	0	0.212246
6189	chr1:216145057-216150415	0	0.0820097	0.0785248	0	0.171269	0	0.083927	0	0	0	0	0	0	0.0741466	0.330777	0	0	0.177782	0	0.170312	0	0.0851096	0.154011	0.106817	0	0	0	0.120002	0	0.0851171	0	0.216318	0	0.17517	0.201291	0.138417	0.077179	0.243342	0	0.105783	0	0	0	0	0	0	0	0
2223	chr6:80109512-80113639	0.107279	0	0.101941	0.0746384	0.111171	0	0	0.0722945	0	0	0.207303	0.0608931	0	0	0	0	0	0	0	0.0737002	0	0	0.299907	0.0693356	0	0.110464	0	0.077894	0	0	0.215049	0.0702063	0	0	0.0871059	0	0.100194	0	0	0	0.142035	0.190447	0.108078	0	0	0.119887	0.201739	0
2310	chr6:119394057-119399037	0.0889076	0.176467	0	0	0.0921332	0	0.0902961	0.179742	0	0	0.171802	0	0	0	0.0889699	0	0	0.191273	0	0	0	0	0.0828493	0.172385	0	0	0.19286	0	0	0.0915765	0.178222	0.17455	0	0	0	0.0496405	0	0.0872695	0.0777074	0	0.117712	0.0789166	0	0.0536008	0.0994062	0	0	0.0677092
1720	chr4:176291963-176300290	0	0.0527726	0	0	0	0.0460466	0	0.0358347	0	0	0	0.0603666	0	0.0954254	0.0532131	0.118523	0	0.114401	0.102072	0	0	0.164302	0.0495524	0.0687362	0.0451752	0.0547546	0	0.115831	0	0.164316	0.0532975	0.139199	0	0.0563602	0	0.0890703	0.0993281	0.0521961	0.139431	0.238246	0.0704037	0	0	0.128235	0	0	0.0999973	0.0809941
4437	chr17:29987658-29991258	0.122979	0.244093	0	0.171123	0	0.212983	0	0.0828746	0	0	0.11882	0.0698047	0	0.110345	0	0.0685265	0	0.132287	0	0.0844861	0	0.12666	0	0.0794828	0	0	0	0.0892937	0	0	0	0.0804809	0	0.130344	0.199707	0.137328	0	0.120713	0	0.0787129	0.081411	0	0	0.0741421	0	0	0	0
2301	chr6:116091022-116100418	0	0.0467692	0.134345	0	0	0.0408083	0.0957252	0.158791	0	0.0461699	0.0455329	0.0267497	0.0124295	0.0422849	0	0.0525197	0	0.15208	0.13569	0.0971271	0.0244765	0	0.0439153	0.0609168	0.0400361	0	0.102228	0.034218	0.0226618	0.0970826	0.0472344	0	0.0478562	0.149846	0.153059	0.0263126	0.0880285	0.0925166	0.0823796	0.120653	0	0.0418307	0.0474775	0.142059	0.158075	0	0	0.0717802
4583	chr18:69972652-69977749	0	0	0	0.0604369	0.0900188	0.0752208	0.176448	0.117078	0	0	0	0.0493069	0.0458218	0	0	0	0	0	0.166742	0.179032	0	0.0894669	0.0809479	0.0561431	0	0	0.0942171	0.0630731	0	0.0894748	0	0	0	0.276207	0.0705322	0.0970024	0.243391	0	0.151848	0	0	0.0771054	0	0.0523706	0	0.097076	0.163354	0.0661552
4663	chr19:21880628-21890401	0	0.0449652	0.172218	0	0.0939054	0.0392343	0.0460165	0.0305332	0	0	0	0.0257179	0	0.0406539	0	0.100988	0	0.0974762	0.0434854	0.0622538	0	0.0466649	0.126664	0.0585671	0	0.0933081	0.147427	0.131593	0	0.186676	0.0908249	0.0296513	0.0230051	0.24011	0.110366	0.0758929	0.0423166	0.0889481	0.079202	0.0289999	0.029994	0	0	0.0273159	0.101318	0.101267	0.298212	0
5872	chr1:45316434-45321282	0.0913278	0	0.0867837	0.0635404	0	0.0790835	0	0	0	0.178948	0	0.103678	0	0.16389	0.182784	0.0508896	0	0	0	0.0627417	0	0.0940611	0.0851046	0.0590261	0	0.188079	0	0	0	0.0940694	0	0.119535	0	0.0967968	0.0741541	0.203967	0	0	0.159645	0.175363	0.241832	0.0810648	0	0.11012	0	0.102061	0	0
2864	chr8:78155679-78162935	0.0610236	0	0	0.0424566	0.126475	0.105684	0.0619767	0.0411233	0	0.0597848	0.11792	0.103913	0	0	0	0.0680071	0	0.0656423	0.175703	0.0419229	0.0316944	0	0.0568654	0	0	0.125671	0.198561	0.0443085	0	0.0628555	0.0611632	0.0798709	0	0.129356	0.0990969	0.0340718	0.113987	0	0.0533361	0.0781163	0	0	0.122956	0.0735801	0	0	0.172133	0.0929473
4664	chr19:21858175-21867391	0.0960939	0.143048	0.0456563	0.0334281	0	0.166421	0.146392	0.0647568	0	0	0.0464221	0.0818162	0	0.0862214	0	0.0535454	0	0.0516834	0.0461133	0.132032	0	0.0494849	0.0895459	0.155266	0	0.14842	0.0521123	0.0697725	0	0.0989785	0.0481568	0.0314432	0.0243954	0	0.0780239	0.0804793	0	0.141485	0.0419942	0.0307524	0.0318065	0.255886	0.0968095	0.0579333	0	0.0536935	0.0903524	0.109773
4291	chr15:74354144-74361624	0	0.117495	0.168753	0.0411853	0	0.05126	0	0.0797839	0	0	0	0.0336007	0	0	0.118476	0.0989562	0	0	0.0568141	0.0406676	0.0307454	0	0.110325	0.0382592	0	0.060954	0	0	0	0	0.0593318	0.154959	0	0.0627413	0.0480649	0.0330516	0.055287	0	0.103478	0.151555	0	0	0	0	0.0661866	0	0	0.0901642
2381	chr6:157700363-157706464	0	0	0	0	0.0752074	0.0628443	0.368539	0.244536	0	0.284404	0.07012	0.0823883	0	0.260473	0.14525	0.0404398	0	0.156134	0.0696536	0.0498581	0	0	0.067629	0.0469055	0	0	0	0	0	0.0747529	0.0727403	0.0949891	0	0	0	0	0.271126	0	0.0634317	0	0	0.193256	0	0.131261	0	0	0.0682381	0
6275	chr22:30676788-30679926	0	0	0.13406	0.0981546	0	0.122165	0	0.0950722	0	0.138216	0	0.160157	0	0	0	0.0786123	0	0	0	0	0	0	0.131466	0.273543	0	0	0	0	0	0	0	0.0923261	0	0	0	0	0	0.27696	0.246614	0.270894	0.0933931	0	0.14213	0.0850543	0.157739	0	0	0.107442
1857	chr5:60658481-60666417	0.0557955	0	0.0530193	0.155276	0.289099	0.19326	0.0566669	0.0752001	0.160664	0.0546628	0	0.0316702	0	0.0500632	0.0558346	0.0310903	0	0	0.05355	0	0	0	0.0519935	0.108183	0	0	0.0605164	0.0405124	0.107322	0.0574704	0.111846	0.219084	0.0283296	0.118273	0.0906068	0.0623054	0.104221	0.109535	0.0975332	0	0.036936	0	0	0.0336381	0.0623841	0	0	0
2675	chr7:150583141-150609982	0	0.0654929	0.0470324	0.0114785	0	0.0571456	0	0.0667085	0	0.0969805	0	0.028094	0	0.0592134	0.0990595	0.0551592	0	0.0177471	0.110841	0.0680056	0	0.0169921	0.0461224	0.0319891	0.00700802	0.118917	0.107366	0.0718754	0	0.0679744	0.0826803	0.172751	0	0.0699453	0.0803755	0.0552699	0.0462263	0.0323887	0.01442	0.042239	0.0546086	0.043933	0.083106	0.258611	0	0.0184373	0	0.0502584
496	chr2:31687629-31695250	0	0	0.0552105	0.0404234	0.180628	0	0	0	0.150574	0	0.16841	0	0	0	0.0581421	0	0	0	0.0557631	0	0	0	0.162427	0.112654	0	0	0.126035	0.0421866	0	0.0598455	0.0582342	0.114069	0	0.0615806	0	0.0973206	0.0542643	0.0570309	0.152346	0.148751	0.115387	0	0	0.105085	0	0	0	0
2663	chr7:143785956-143793742	0	0	0	0.0791337	0	0.0492456	0.0577584	0.0766487	0.0982555	0.0557158	0.054947	0.0322803	0.0149993	0.0510275	0	0.0316892	0	0.0611746	0	0.117209	0	0.117145	0.10599	0.0735116	0	0.292794	0.246728	0.0825855	0	0.0585774	0.0570003	0.0372174	0.0288753	0.120552	0.0461761	0.0635056	0.0531144	0.111645	0.049706	0.0363998	0.075295	0	0	0.0342861	0	0.190661	0.106945	0.0433106
4745	chr19:47392829-47398771	0.074516	0.0739509	0.141617	0	0.0772195	0	0	0.150647	0	0	0	0	0	0.0668604	0.223705	0	0	0.160312	0.0715172	0.051192	0	0	0	0	0	0	0	0.0541051	0	0	0	0	0	0.315913	0	0.0416051	0.13919	0.0731431	0.0651288	0.0953879	0.0493288	0	0.150142	0.314471	0.0833152	0	0	0
3546	chr11:73939029-73947458	0.0525325	0.104268	0.149756	0.0365489	0.0544384	0	0.0533529	0.0354011	0	0	0.0507559	0.0298181	0	0.188542	0.0525693	0.0878163	0	0.226034	0.100837	0.0360895	0	0.0541047	0.0489528	0.135809	0	0	0.0569773	0.0762863	0	0.0541094	0.0526526	0	0.0266729	0.0556783	0.085308	0.117323	0.0981262	0	0	0.134494	0.0695518	0.0932582	0	0.0633418	0.0587357	0.0587062	0	0.0800141
3550	chr11:77548980-77563052	0.0629359	0.124917	0.119609	0.175148	0	0.0544981	0	0	0	0.0924875	0.0304038	0.0535849	0	0.0564701	0.12596	0.0701382	0	0	0.151008	0.12971	0.0326876	0.129639	0.0879711	0.0610142	0	0.0648045	0.0341305	0	0	0.0324126	0	0.0411869	0.0479327	0.0333524	0.153303	0.0527093	0	0.0617763	0.0825113	0.100705	0.0416629	0.0558635	0.0634046	0.0569144	0.0703677	0	0.0591756	0.19172
786	chr2:196123763-196133033	0	0	0	0.0332334	0.0990003	0	0.0485131	0.128759	0.0550185	0.0467974	0.138455	0.0542264	0	0.0857192	0.0956011	0.0266168	0	0	0.137534	0	0	0	0.0445122	0.092617	0	0.0983705	0	0.0693661	0	0	0.0957526	0.03126	0	0.0506275	0	0.0800105	0	0	0.0417496	0.0305733	0.0316213	0.0423992	0.0481228	0.172788	0.0534076	0.160142	0.179652	0.0727558
3415	chr11:22992705-23000627	0.111788	0.0554701	0.053113	0.0388877	0	0	0.056767	0	0	0.0547594	0	0.0317262	0	0	0	0.0311453	0	0.120249	0.107289	0.0767978	0	0	0.156256	0.0722498	0	0	0.0606233	0.0811679	0	0.172716	0	0.146314	0	0.118482	0	0.218454	0.156608	0.109728	0.0488528	0.035775	0.0740025	0.148839	0.0563103	0.0673951	0	0	0	0.0425671
4261	chr15:45013211-45014718	0	0	0	0	0	0	0	0	0	0	0	0	0	0.263496	0	0	0	0	0	0	0	0	0	0	0.374223	0.302385	0	0	0	0	0	0	0	0	0	0	0	0.288255	0	0	0.194404	0	0	0.531138	0	0	0	0.223647
4533	chr18:31803770-31810043	0	0	0.0670727	0	0	0.0611214	0	0.0475664	0	0.138304	0	0.0400648	0	0.189999	0.0706342	0.0393312	0	0	0.135488	0.0969826	0	0	0	0	0	0.218041	0	0	0	0.0727036	0	0.138577	0	0.0748116	0.0573116	0.0394101	0.131846	0.138568	0	0.0903555	0.0934527	0.0626528	0.142221	0.0425543	0.157839	0.31552	0.0663674	0
5814	chr1:6560514-6570438	0.089239	0.0885622	0.0423994	0	0	0.0386374	0	0	0	0.0437137	0.172442	0.101306	0	0.120106	0.0893016	0.0497257	0	0	0	0.0306533	0	0.0459549	0	0	0	0.0918885	0.0967897	0.0323976	0	0.0459589	0	0.146001	0.0679654	0.0472915	0.036229	0.0249128	0.0416728	0.0437974	0.116996	0.171352	0.0886129	0.0396054	0.0449518	0.0807009	0	0.14959	0	0
4633	chr19:19943770-19956655	0	0.034106	0	0	0.071227	0.0595182	0.0698068	0	0	0.168345	0.0996133	0.0975348	0.0815768	0.0925077	0.103172	0.134048	0	0.0739355	0.0659672	0.0236097	0	0.0707904	0.0960746	0	0	0.035387	0.260921	0.0249532	0	0.0353983	0.103336	0.112452	0	0.109274	0	0	0.064194	0.1012	0.150186	0.0879854	0.136502	0.0610094	0.207735	0.103595	0	0	0.0646266	0.0261725
5344	chrX:37465409-37473413	0.165964	0.109804	0.262845	0.115468	0	0	0.112371	0	0	0	0.0534506	0.0314012	0	0.198552	0.387522	0.0924787	0.269214	0	0	0.0760111	0	0	0.0515518	0.0357548	0	0.056964	0.0600023	0.0803364	0	0	0	0	0	0.0586343	0.0449186	0.0926643	0.051668	0	0	0.0354085	0	0	0.0557335	0	0	0	0	0
1440	chr4:68029331-68036051	0	0	0	0	0	0	0	0.0444028	0	0	0.190986	0	0.0173783	0	0	0.0367154	0	0	0	0	0.034222	0	0	0	0	0.0678465	0	0	0	0	0.0660409	0.0862406	0	0.139672	0	0	0	0.0646763	0	0	0	0	0	0.0794482	0.147342	0.147268	0.0619534	0
2164	chr6:61600186-61606274	0	0.0721777	0	0	0	0	0.0738652	0.196046	0.0209426	0.0712529	0.140539	0.123846	0	0.0652573	0	0.121579	0	0.156468	0.209407	0.0499646	0	0	0.0677734	0.0470056	0	0.0748886	0	0	0	0	0	0.0951919	0.0369276	0.231254	0.118106	0.121823	0	0.0713893	0	0	0.096292	0	0.146542	0.0438472	0	0.0812766	0.136768	0
2458	chr7:33158830-33174607	0	0.0557092	0.160026	0.0195276	0	0.0243045	0.0855175	0.0567432	0.00808209	0.0549954	0.0271183	0.0796573	0	0.0755517	0.0280872	0.062559	0	0.0905754	0.0269379	0.0578466	0	0	0.0784648	0.0362806	0	0.144504	0	0.0611383	0	0.02891	0.0281317	0.0183681	0.042753	0.0297482	0.0911581	0.0783557	0	0.0275503	0.0981266	0.107787	0	0	0.0848295	0.0846069	0.0941454	0.0940981	0.0263905	0.128252
5178	chrY:19082270-19088475	0	0	0	0	0	0	0	0	0	0	0	0	0	0.192081	0.0714082	0.0795243	0	0	0	0	0	0.0734938	0.0664957	0.276717	0	0	0.309583	0.0518122	0	0	0	0	0	0	0	0	0	0	0	0	0	0	0	0	0	0	0	0.108688
1813	chr5:37264634-37272610	0.0555157	0.275473	0.105507	0.0386244	0.0575299	0.0961454	0.112765	0.149646	0	0	0.0536383	0	0	0.0498122	0.0555546	0.0928033	0	0	0.0532815	0	0	0.0571772	0.103466	0	0	0.0571639	0	0	0	0	0.111285	0.108993	0	0.0588401	0	0.0309965	0	0.0544928	0.0970441	0	0.147003	0	0	0.0334694	0.124142	0.06204	0	0.0845579
1281	chr3:197243000-197248821	0.0760647	0	0.07228	0.105842	0	0	0.154505	0.102519	0	0	0.220477	0.0431753	0	0.06825	0.076118	0.0423847	0	0	0	0.052256	0	0	0.141763	0.0491614	0	0.156646	0	0	0	0	0.0762386	0.0497787	0.0772423	0.0806197	0	0	0	0	0	0.0973703	0.201416	0.135034	0.0766311	0.045858	0.0850468	0	0	0
3510	chr11:60185435-60193210	0	0.0565188	0.108234	0.0396228	0.0590169	0	0.0578402	0.0383785	0	0.0557946	0.110049	0.0969779	0	0.102199	0.113981	0	0	0.0612611	0	0.0782496	0.029579	0.175965	0.10614	0.0368078	0	0	0	0	0	0	0	0.03727	0	0	0.138724	0.0953932	0.0531896	0	0	0	0.0377007	0.0505508	0.0573748	0.0343346	0.0636757	0	0.160644	0.0433718
1066	chr3:112690299-112701577	0	0.116896	0.0373095	0	0.0406876	0.0339991	0	0.0793771	0	0.0384661	0	0.0222863	0	0.176147	0.0392906	0.0218782	0.0173698	0.168939	0.150732	0.161841	0	0.0808764	0	0	0	0.0808576	0	0.0285084	0	0	0.196764	0.0513896	0	0.0832286	0.0318799	0.10961	0.14668	0	0.0343169	0.0251303	0	0.0348509	0	0.0473421	0.175598	0.0877548	0.110752	0
4250	chr15:35238616-35243837	0.169609	0	0.0805849	0	0	0	0.0861289	0.0571489	0	0.0830829	0.24581	0.144408	0.0223669	0	0.0848639	0.0945093	0.0375171	0.091223	0.0813915	0.0582601	0	0.0873425	0.0790257	0	0	0.261967	0.18396	0	0.16312	0	0	0.110996	0	0	0.0688574	0.0473495	0.158408	0	0.0741211	0.108558	0	0	0	0	0	0	0.0797374	0
2029	chr5:159366332-159373656	0	0	0.114898	0.126187	0	0.0523516	0	0	0	0	0.0584126	0.102949	0.0318907	0.0542459	0.181499	0.0336879	0	0	0.232096	0	0	0.124533	0	0.039074	0	0	0.0655725	0.131691	0	0	0.121191	0	0.0306966	0.0640775	0.0490885	0.101267	0.112929	0.0593432	0.158523	0.0773911	0.040022	0.0536633	0.121815	0.0364485	0.0675962	0.0675622	0.170535	0.0920845
6166	chr1:205884553-205890432	0	0	0	0	0.0780469	0.065217	0.229472	0.101507	0	0	0.218302	0	0	0	0	0.0419666	0	0	0.0722834	0.155222	0	0	0	0	0	0	0	0.0546848	0	0.15515	0	0.246438	0	0	0	0.0420509	0	0.0739267	0.131653	0	0	0.0668509	0	0.0908114	0.0842079	0.168331	0.0708144	0.057357
2673	chr7:150307240-150313286	0.146469	0.072679	0.0695906	0.0509521	0	0.126832	0	0.049352	0	0.143496	0	0	0	0.0657105	0.146572	0.0408077	0	0	0	0.0503116	0	0	0	0	0	0.226226	0.0794309	0.106349	0	0.0754329	0.0734019	0.0479265	0.0371841	0.15524	0	0	0.0683979	0	0.0640087	0.0468737	0.0484804	0.0650047	0	0	0	0.0818411	0.0688588	0.055773
3543	chr11:71705991-71714722	0	0.150993	0.0481922	0	0.0525556	0.0439161	0	0.0683535	0	0	0	0.0287868	0	0.0455052	0.0507512	0.0847792	0	0.0545541	0.0973492	0.0348413	0	0.0522334	0.0472598	0	0	0.0522213	0.110013	0.0368239	0	0.156714	0.0508316	0.165948	0	0.0537526	0.123536	0.0849493	0	0	0	0	0.0335732	0.0900328	0	0.0305755	0.113409	0.0566758	0.0953708	0.0772467
6126	chr1:185947626-185954216	0.0671899	0	0	0.0467467	0.208883	0.174545	0.272957	0.0905573	0	0.0658259	0.0649177	0.0381379	0.0177211	0.060287	0	0	0	0	0	0.0461591	0	0	0	0	0	0	0	0	0.129239	0	0	0	0.034115	0.0712134	0.10911	0.0375147	0.0627526	0.0659519	0.117451	0	0	0	0	0.0405076	0.225372	0.225259	0.0631754	0
4151	chr14:52164861-52172557	0	0.0570989	0.164017	0.0400295	0	0	0.0584338	0.0387724	0	0.112734	0.0555895	0.130631	0	0	0	0.0320597	0	0.12378	0.220879	0.197632	0	0.0592572	0	0.148742	0	0.0592434	0.0624034	0.0417756	0	0.0592624	0	0	0	0.0609806	0	0.128496	0.107471	0	0.0502872	0.220952	0.0380877	0	0	0.034687	0	0	0	0.043817
3300	chr10:79604769-79608013	0	0	0	0	0	0	0	0.0919666	0	0.133701	0.395568	0.154926	0	0	0.136567	0.0760443	0	0.1468	0	0	0	0	0.127172	0	0	0	0	0	0	0	0	0.0893102	0	0.144643	0	0.152394	0	0	0.119279	0.0873483	0	0	0	0	0	0	0	0
5959	chr1:89087359-89088526	0	0.376276	0	0	0.392907	0	0.385073	0	0	0	0	0	0	0	0	0	0	0	0	0	0	0	0	0	0	0	0	0	0	0.390533	0	0	0	0	0	0	0	0	0	0.242676	0	0	0	0	0	0	0	0
1347	chr4:24500975-24508027	0.0627887	0.186937	0.119329	0.0873691	0	0.0543706	0	0	0	0.0615141	0.121331	0.106919	0	0.225352	0.125665	0.0349871	0	0	0.120524	0.0431354	0	0.0646679	0.0585102	0.0405809	0	0.0646529	0	0	0	0	0	0.0821811	0	0.133097	0	0	0	0.123264	0	0	0	0.0557328	0	0.0757084	0.0702031	0	0	0
4804	chr20:1396938-1407244	0	0.0852799	0.040828	0	0	0.111616	0	0.0579085	0	0.0420936	0.0415128	0.024388	0	0.0385516	0	0	0	0.0924355	0.0412367	0.0295173	0.0223155	0.132755	0	0.0277692	0.0182506	0.176966	0.0466012	0	0	0	0.0430641	0.0281179	0	0	0.0697726	0.0959577	0.0802565	0.168697	0.0375532	0.0550005	0.0284429	0.0381375	0.259715	0.0518066	0.0480394	0	0.0403987	0.0654428
1285	chr4:399612-409299	0	0.0907287	0	0	0	0	0.046425	0.0616085	0	0.0895662	0	0.0259462	0	0.205074	0	0.0509422	0	0	0.0877429	0.0314032	0.0237413	0.188316	0.0425962	0.059087	0	0.0470682	0.0991574	0.0663804	0	0.0941665	0	0	0.0232094	0.145345	0.0742307	0	0	0.0448688	0.0399526	0.0585147	0	0	0.184206	0.0826751	0.0511088	0.102166	0.0429799	0
1559	chr4:109312805-109321394	0	0.102326	0	0.179341	0.0534244	0.178568	0.104718	0	0	0.0505074	0	0.0292627	0	0.0462575	0	0.0287269	0	0.110912	0.0989585	0.0708345	0	0	0.048041	0.0333198	0	0	0.055916	0	0	0	0.0516718	0.0337383	0.0785281	0.0546412	0.125579	0.115138	0.0962985	0	0.0450594	0.0659942	0.204769	0	0	0.031081	0.0576417	0.0576127	0.193895	0.0392619
4555	chr18:46868452-46877781	0	0.0942101	0.0451033	0.0330233	0.0491871	0	0.0964127	0.0639725	0.0136677	0	0.0458599	0.0269418	0	0.0851772	0	0.0793453	0	0.102115	0.0455548	0.0326082	0	0.0977711	0	0.122708	0	0	0.154443	0.0344637	0	0	0	0.186374	0.0240999	0	0.0385395	0.053003	0.0886607	0.0465905	0.0414856	0.12152	0	0.126393	0	0.0858474	0	0.106086	0	0.0361478
4614	chr19:9723690-9729535	0	0.0751779	0.0719833	0	0	0.131193	0	0.0510488	0	0.0742146	0	0.0429981	0	0.0679698	0.151611	0.0422107	0	0	0	0.104083	0.0393442	0.0780196	0	0.0489595	0.0321775	0	0.0821619	0.0550028	0	0.0780264	0.151851	0.0495743	0	0	0.184523	0.0845909	0	0	0.0662094	0.0484853	0.100295	0.0672397	0.0763165	0.0913396	0	0.084655	0	0.0576906
1179	chr3:152596604-152605968	0	0.046929	0.0449348	0.0657997	0.0980066	0.0818955	0.0480262	0.0318667	0.0136166	0.0463277	0	0.0805232	0	0.0848588	0.0473208	0.0790488	0	0.0508667	0	0	0	0.0974057	0.0440654	0	0.0200864	0	0.0512887	0.103005	0.0909571	0.243536	0.0947915	0.0928387	0.0480197	0.0501193	0	0.0792074	0	0	0	0.0605329	0.0626078	0	0	0.0570177	0	0	0.0444622	0
3636	chr11:107231439-107236618	0	0	0	0	0.0885938	0.14806	0	0.0576123	0	0	0	0.242632	0	0.153418	0	0	0	0.0919626	0.0820515	0	0	0	0.0796665	0	0	0.0880302	0	0	0.0822214	0.0880584	0.0856875	0.111896	0	0	0.0694157	0.1432	0.079846	0	0.0747221	0	0.0565948	0.0758848	0.172257	0.0515416	0	0.0955393	0.080384	0
5804	chr1:1412252-1418852	0	0	0	0	0	0	0.136272	0	0	0.0657262	0.129639	0	0	0.120391	0	0.0747656	0	0	0	0	0	0	0	0.0867194	0.19948	0	0.145529	0.0487118	0	0	0.0672415	0.0439042	0	0.142211	0	0.0749157	0.0626575	0.131704	0	0.0858794	0	0	0	0.161785	0	0	0.126159	0.0510922
3407	chr11:15064020-15068599	0	0.0959585	0.0918808	0	0	0.0837283	0	0.130319	0	0	0.186844	0	0	0	0	0.107757	0	0.10401	0.185601	0	0	0	0.0901031	0.0624929	0	0	0.104873	0	0	0	0	0.189833	0	0	0.157019	0.0539867	0.0903061	0	0	0.123775	0.128018	0	0	0.0582938	0.10811	0.108055	0	0
2554	chr7:91447795-91454614	0	0.0644413	0	0.090354	0	0.0562281	0.395688	0.0437583	0	0.127231	0.0627379	0.110572	0	0.0582627	0.0649793	0	0	0.0698484	0.0623206	0	0	0	0.0605091	0.125902	0	0	0.140856	0	0	0	0	0.0424944	0	0.0688222	0.15817	0	0.121291	0	0.113507	0	0	0.0576369	0.0654174	0	0.145203	0.072565	0	0.0494515
2910	chr8:97200740-97206678	0	0.0740007	0.0708561	0	0	0.0645691	0.0757308	0	0	0	0.0720445	0.0423247	0	0.0669055	0.0746185	0.0415497	0	0	0.0715653	0.0512265	0	0.153596	0	0	0	0.07678	0.161751	0.216566	0	0	0	0	0	0	0	0	0	0	0	0.0477261	0.049362	0	0.0751215	0.134864	0.0833713	0.0833294	0.070111	0
992	chr3:78581209-78588919	0.0574308	0.170986	0	0.119871	0	0.049731	0	0	0	0.0562649	0.110977	0.0651969	0	0.103061	0	0	0	0.123555	0	0.0394546	0	0.177449	0.0535174	0.0742361	0	0.177408	0	0.0833994	0	0	0.0575621	0.112753	0	0	0.0466312	0.192395	0.0536379	0.0563726	0.0501959	0.110276	0	0	0.173575	0.103872	0.0642125	0	0.107999	0
3606	chr11:95934454-95943860	0	0.0934389	0	0	0	0	0.0478117	0	0	0	0	0.106885	0.0869139	0.04224	0	0.0262319	0.312397	0.0506396	0	0.0323413	0	0.145456	0.0438686	0.030426	0	0	0.0510597	0.0683633	0	0.0484897	0.0471841	0.215657	0.0239027	0.0997912	0	0.131423	0	0	0.041146	0.0903939	0	0.0417863	0.0948542	0.113526	0	0	0	0
849	chr3:848019-853278	0	0.0835532	0	0.0585755	0.174493	0	0.171013	0	0	0.329931	0.244034	0	0	0	0.0842508	0	0	0	0	0.0578392	0	0	0.0784548	0	0	0.0866914	0	0.122261	0	0	0.168769	0.0550973	0	0	0	0.18803	0.0786316	0	0	0	0.111468	0	0	0.101515	0	0	0	0.128235
3395	chr11:6747292-6754907	0	0.0577061	0.110508	0	0	0.0503513	0.0590553	0.156739	0.0167436	0	0.0561807	0	0	0.104347	0.116376	0.0648014	0	0	0	0.0399467	0.0302004	0.119775	0.0541849	0	0	0	0.063067	0.0422199	0	0	0.11656	0.038053	0	0	0.0472129	0.129863	0.108614	0.0570758	0.152466	0.0372171	0.0384928	0.103226	0.0585802	0.0701118	0.0650134	0.129961	0	0.044283
2320	chr6:122504871-122514220	0	0.0470043	0.0900137	0.0329526	0.0490819	0.0820269	0	0.0319178	0	0.185608	0.0457618	0.0537683	0	0.127492	0	0.0791756	0	0.101897	0.0454574	0.0976153	0	0	0.0441361	0	0	0	0	0.10317	0	0.0487853	0.0474718	0.123984	0	0.0501998	0	0.0264448	0.0442355	0.0929817	0.0413968	0.06063	0.0627082	0.168164	0.0477162	0.0856638	0.158869	0	0.0890672	0.072141
4038	chr13:90846804-90854278	0.651684	0.470357	0.225185	0.0824367	0	0	0	0.039924	0	0	0	0	0	0.0531574	0	0.0330119	0	0	0	0	0	0.061017	0	0	0	0	0	0.0430163	0.0569775	0	0.118759	0.0387708	0	0	0	0	0	0	0	0	0	0	0	0.0357171	0	0	0	0
5909	chr1:65637768-65648036	0.0431248	0.0855955	0.0409791	0	0.0893788	0	0.0437983	0	0	0	0.0416664	0.0489564	0	0	0	0.02403	0	0.0927776	0.0413893	0.0296265	0.0223981	0.0444155	0.120559	0.055744	0.0183182	0	0	0.0626247	0	0	0.12967	0.084666	0	0.228536	0.105046	0.0722346	0	0	0.188461	0.110408	0	0.0382786	0.0868919	0.0519984	0	0	0	0.0328425
2983	chr8:144955095-144959802	0	0.0933496	0.0893828	0	0	0	0	0	0	0	0	0.106783	0	0	0	0	0	0.202365	0	0.0646207	0	0.0968782	0.0876534	0.0607938	0	0.0968557	0	0	0.0452322	0	0.0942781	0.0615573	0	0.0996958	0	0.0525189	0	0	0.164427	0.301025	0.373612	0.0834926	0	0.170127	0.10517	0.105118	0	0
3433	chr11:31608175-31609536	0	0	0	0	0	0	0.330224	0	0	0	0	0	0	0	0	0	0	0	0	0	0.168874	0	0	0	0	0	0.352657	0	0	0	0	0	0	0	0	0	0	0.319155	0.568371	0	0.430486	0	0	0	0	0	0	0
611	chr2:90143021-90151122	0.0546592	0.0542446	0.0519395	0.0380285	0.0566423	0	0.166539	0.0368343	0	0	0.105621	0.0310253	0	0.0490436	0	0.0304572	0	0	0.104919	0	0.0567776	0	0.101869	0.0353268	0	0.056282	0.059284	0	0	0	0.109568	0.0715408	0	0.115865	0	0	0.102099	0	0	0	0.108551	0	0.110132	0.0659061	0.183341	0	0.0513934	0.0416267
2171	chr6:63950260-63956533	0.211754	0	0.0670727	0.147326	0.146291	0	0.0716871	0.0951328	0	0.0691518	0	0.0801296	0	0.189999	0	0.157325	0	0	0.135488	0.0484913	0	0.218092	0	0	0	0.0726804	0	0.205003	0	0	0	0	0	0	0.0573116	0	0.0659232	0	0	0	0	0	0	0.0425543	0	0.07888	0.0663674	0.10751
3178	chr9:137844214-137849562	0	0	0	0	0.171589	0	0.0840839	0	0	0.0811102	0	0.0469932	0	0.14857	0.082849	0.0461327	0	0.0890571	0.0794591	0	0	0	0	0.0535086	0	0	0.089796	0.0601134	0	0	0.0829802	0	0	0.0877487	0.0672225	0.138676	0.0773233	0.0812655	0.217084	0	0.0548067	0.0734873	0	0	0	0	0	0
4428	chr17:19879675-19896052	0.0540785	0.0536683	0.0513877	0.112874	0.0560405	0	0	0.0546645	0.00778601	0	0.0522497	0.0306956	0	0.169829	0.0811746	0.105468	0	0.0872572	0.0519021	0.092879	0.0140436	0.055697	0.0755902	0.104854	0	0.055684	0.117308	0.0588985	0.0390072	0.0557019	0	0.0176952	0.0274578	0.0573169	0.109773	0.0452911	0.0252535	0.026541	0.0236329	0	0.0715987	0.0720021	0.0272406	0.0326029	0.0302322	0.0604339	0.076271	0.0205922
642	chr2:105979107-105986046	0	0	0.0606361	0	0	0.165768	0	0.129005	0	0.0625157	0	0.10866	0	0	0.0638558	0.0711135	0	0	0.122486	0.0438378	0	0.0657208	0.0594629	0.0412417	0	0	0	0.0463324	0	0	0.0639569	0.0417596	0	0	0	0	0	0.187906	0.111545	0.0408422	0.0844844	0	0	0.115412	0.0713462	0	0	0
2720	chr8:8197205-8206652	0.0937444	0	0.04454	0	0.0971456	0.162352	0.0476043	0.0947602	0	0.183683	0.0452871	0.0532106	0	0	0	0	0	0	0.0449859	0.0322009	0	0.09655	0	0.0908819	0	0	0.0508381	0.0680666	0	0	0	0	0	0.0993581	0.114174	0.0785116	0.0875534	0	0.0409674	0.0600011	0.0310289	0	0.0472213	0	0	0	0	0.0713927
3393	chr11:6069106-6075893	0.0652399	0	0	0.04539	0.0676069	0	0	0	0	0	0.0630337	0	0	0.175612	0	0.036353	0	0.0701777	0.187843	0.0896389	0	0.134385	0.0607944	0.0421652	0	0	0.07076	0	0	0	0	0	0	0.0691467	0.0529719	0	0.182794	0.0640379	0	0.0417568	0	0.0579086	0	0.039332	0.145888	0.145814	0.0613419	0.0496846
3699	chr12:9902699-9911285	0	0	0	0	0	0.0893154	0	0	0	0.10105	0.149484	0.0292729	0	0.0462736	0	0	0	0	0	0	0	0	0	0	0	0.0531031	0.167807	0.0374457	0	0.10624	0.0516899	0.16875	0	0	0.0418741	0.0287946	0.144498	0.202487	0.180301	0	0	0.0457766	0	0.0310918	0	0.0576329	0	0.157102
1226	chr3:167430824-167435955	0	0	0	0.0600365	0	0	0	0	0	0.0845399	0	0	0	0.0774263	0	0.0480834	0	0	0	0.118564	0	0.0888742	0.160823	0.0557711	0	0	0.0935929	0.0626552	0	0	0	0	0	0.274377	0	0.0481799	0	0	0	0	0.0571241	0.0765946	0	0	0.0964814	0.0964328	0	0
4714	chr19:36255756-36265235	0.23357	0.278158	0.133169	0.0975023	0.0968177	0.0809021	0.0474436	0.0629602	0	0.0457657	0.0902684	0	0	0.0419147	0.0467467	0	0	0	0.044834	0.0641845	0	0	0.0870617	0	0	0.0481009	0.0506665	0.0339184	0	0	0.234104	0.183425	0	0.0495114	0.0379297	0.0260822	0	0.0458533	0	0	0.0618483	0.082929	0.0941237	0	0.0522302	0.0522039	0	0
4409	chr16:70616691-70625455	0.0505247	0	0.0960215	0.035152	0	0	0	0	0	0.049499	0	0.0286785	0	0.0906678	0.0505601	0.0281533	0	0.108697	0.0484913	0.0347101	0	0	0	0.0653092	0	0.260124	0	0.110056	0	0	0	0	0	0.0535502	0.0410238	0	0.0943758	0.0991875	0.0441598	0.0646766	0.0668935	0.0448469	0	0.121842	0	0	0.0475059	0.038478
1999	chr5:136540941-136543623	0	0	0.156845	0	0.171046	0	0	0	0	0	0	0	0	0.1481	0	0	0	0	0	0	0	0.169997	0	0	0	0	0	0	0.5556	0	0	0	0	0	0	0.0921577	0	0	0.144264	0	0	0.146509	0	0	0.184548	0	0	0
5426	chrX:63272569-63282655	0	0.13071	0.0834369	0.0916349	0.0454958	0.0760337	0.133766	0	0	0.0430117	0.0424182	0.0498397	0.0231585	0.0393924	0	0	0	0.0944515	0	0.030161	0	0	0.0818226	0.0567498	0	0	0.0476176	0	0	0	0	0.0287312	0	0.0465319	0.0356472	0.0245127	0.0410035	0.086188	0.0383722	0.1967	0.0871897	0.116908	0	0.0264683	0.0490872	0.0490625	0	0.0668701
5174	chrY:18996635-19004670	0	0	0	0	0	0	0	0	0	0	0	0	0	0	0.16544	0.122829	0	0	0	0	0	0.113515	0	0.0712338	0	0.226977	0	0.0800265	0	0	0	0	0	0	0	0	0	0	0	0	0	0	0	0	0	0	0	0.0839371
3236	chr10:42645191-42654770	0.0462264	0.0458758	0.0439263	0.064323	0.0479035	0.0800576	0.0938967	0.0311515	0.013311	0	0	0.157432	0	0	0	0	0.0204504	0.0994502	0	0.0317572	0.0960359	0	0	0.0896297	0.0392713	0	0.0501376	0.0671287	0.0444579	0	0.0463321	0.0605035	0.046942	0	0	0.0516199	0.0431735	0.0453747	0.040403	0.0887615	0.153007	0.0820633	0	0.0278691	0	0.154977	0.0434644	0
568	chr2:71020906-71024472	0	0	0	0.172754	0	0.107507	0	0.167329	0	0	0	0	0	0	0	0.0691797	0	0	0	0.0852914	0	0.127867	0.231383	0	0	0	0.134656	0.0901448	0.059701	0	0	0	0	0	0.100806	0	0	0	0	0	0	0.2204	0	0	0	0	0	0
4803	chr20:897124-903148	0.0735018	0.145889	0.0698447	0.0511381	0	0	0.0746498	0	0	0	0.0710162	0	0	0	0	0.0409567	0	0	0.141088	0	0	0.0757016	0.0684933	0.142515	0	0.0756841	0	0.0533687	0.14138	0	0.0736699	0	0	0	0	0.164155	0.137295	0.0721476	0.128485	0	0.145972	0	0.0740492	0.132939	0	0	0.0691102	0
2897	chr8:90089333-90095881	0.0676208	0.0671079	0.128513	0.0470465	0.140148	0	0	0	0	0.0662481	0	0	0	0.182021	0.0676682	0.0376796	0	0	0	0	0	0.0696446	0.063013	0	0	0.0696284	0	0.147296	0	0	0	0.0442528	0	0.14334	0	0.113266	0	0.0663749	0.0591022	0.0432807	0.0895285	0	0	0	0	0	0.127161	0.0514978
3542	chr11:71740712-71749874	0	0.0479635	0	0.0672503	0.0500836	0.0418505	0.0490849	0	0	0.0946979	0.0466957	0.0548656	0	0	0.0967279	0.0807914	0	0.051988	0.0927702	0.066405	0	0	0.0450368	0.0312362	0	0.149295	0	0	0	0.0497809	0.0484406	0.0632569	0	0.102448	0.0392419	0.0269845	0	0.0474396	0.0422417	0	0.063988	0.042899	0.04869	0.145687	0	0	0.0454424	0.0368066
2754	chr8:27491923-27497770	0.0757265	0.0751522	0.143917	0	0	0.0655738	0.0769092	0	0	0.0741892	0.0731656	0	0	0	0	0	0	0	0.145358	0.0520237	0	0	0	0	0	0.15595	0	0	0	0.0779997	0	0.0495574	0	0	0	0.0845619	0.141451	0.148663	0.0661868	0.145406	0.10026	0.134433	0.0762904	0.0456542	0.0846687	0	0	0
4159	chr14:57328587-57332180	0	0	0	0.0857282	0	0	0	0	0	0	0	0	0	0	0	0.13732	0	0	0	0.253952	0	0	0	0	0	0	0	0	0	0	0	0	0	0	0	0	0.115081	0	0	0.0788662	0.163139	0.218744	0.124136	0.0742865	0.137769	0	0.115857	0
2415	chr7:6947702-6958742	0	0.0398053	0.0381138	0.0279057	0.0831294	0	0	0.0270294	0	0	0.116259	0.113833	0	0	0	0.0446996	0	0	0.0384953	0.027555	0.166656	0.0413099	0.0747527	0.0518463	0	0.0413003	0.174013	0.0582459	0	0.0413135	0	0.0262487	0.183287	0.0425113	0.130268	0.0671839	0.0749211	0	0	0	0.0796561	0	0.0404082	0	0.0896916	0.0448232	0.037713	0
1879	chr5:72926262-72936085	0	0.0894727	0.0856706	0.0940881	0.0467137	0	0	0.0303778	0	0.0441631	0	0.051174	0	0.040447	0.0451098	0.0753554	0	0	0.0432641	0	0.0234127	0.0464274	0.0420065	0.0874035	0	0	0.0977847	0	0	0.0928629	0.0903626	0	0	0.0955553	0.073203	0	0.0421012	0.0884954	0.0787989	0.0865569	0	0	0	0.0271769	0	0	0.0847697	0.205981
4646	chr19:20611051-20618132	0.125063	0.124115	0	0	0	0	0.0635082	0	0	0.0612622	0.0604169	0	0	0	0.125151	0.0348438	0	0.201793	0	0.128876	0	0	0.0582706	0	0	0	0.203467	0.0454034	0	0.128817	0	0	0.0634996	0.198828	0	0.0349137	0	0.0613794	0	0	0	0.166514	0	0.0753983	0.139831	0	0.0587954	0
1798	chr5:32662801-32667449	0	0.0945343	0	0.132548	0	0	0	0.0641926	0	0.093323	0	0.054069	0	0	0	0.106158	0	0.204933	0.27427	0.0654408	0	0.0981076	0.177532	0	0	0	0	0.0691647	0	0	0	0.0623385	0	0.100961	0	0	0	0	0.0832567	0.060969	0	0	0.0959661	0	0.106505	0.106452	0	0.0725445
5901	chr1:58169729-58174110	0	0.200589	0	0	0	0	0.102639	0	0	0	0.0976432	0.0573635	0	0	0	0.0563131	0	0	0.0969937	0	0	0	0.188349	0.0653166	0	0	0	0.073379	0	0.312284	0.101292	0.0661368	0	0	0	0	0.0943866	0.0991988	0	0.064684	0	0	0	0	0.112995	0	0	0.0769647
2581	chr7:102970588-102983136	0	0.105066	0.0670674	0.171866	0	0.0305583	0.0716814	0	0	0.0691463	0	0.0600924	0	0.063328	0.141257	0.019664	0	0	0.0338694	0.0727311	0	0.0363457	0	0.022808	0	0.145349	0.0382755	0.0256233	0	0	0	0	0.0179179	0.0374028	0.114614	0.0197035	0.131836	0.207836	0.0308439	0	0	0.0313239	0.0355524	0.106377	0.0789134	0.0394369	0.0995431	0.0806262
2698	chr8:7241363-7253747	0.0715137	0.106457	0.0679555	0.124387	0	0.0309629	0	0.144577	0	0	0	0	0	0.0962499	0	0.0199244	0	0.0769263	0.0686357	0.122824	0	0.073654	0	0	0	0.0368185	0	0	0	0	0	0	0	0.151592	0.029033	0.0598932	0	0.105294	0.125009	0	0.165695	0.0634773	0.108069	0.0431143	0	0.0399591	0	0
3876	chr12:92386730-92394176	0.1784	0.0590157	0.0565079	0.0413733	0	0	0	0.0400741	0	0	0	0.0337541	0	0.0533573	0.0595084	0.132544	0	0.0639676	0.0570735	0.0408533	0	0	0.0554146	0	0	0	0	0.043178	0	0	0	0.0389166	0	0.0630278	0.144853	0.066405	0	0.0583711	0.103951	0	0.0393663	0.0527841	0.119819	0.0358514	0.0664888	0	0	0
2129	chr6:40861389-40868726	0.06035	0	0.0573473	0	0.125079	0.0522589	0	0.0406693	0	0.0591249	0	0.0342555	0	0.0541498	0.0603924	0.0672564	0	0.0649177	0	0.0414601	0	0.0621562	0.0562377	0	0	0	0	0.131458	0	0	0.120976	0.0394946	0	0.063964	0.147005	0.0673914	0	0.118476	0.0527474	0.038627	0	0.0535682	0	0	0	0.0674425	0.226977	0.0459607
2315	chr6:121041384-121049351	0	0.110314	0.052813	0	0	0.096254	0.0564464	0	0	0.1089	0.0536989	0	0	0.0498684	0.111235	0.0619387	0	0.0597849	0.160025	0.076364	0	0	0	0.0359209	0	0	0.120562	0.0403547	0	0.0572468	0	0	0	0.17672	0	0	0	0.109109	0.242884	0.0355729	0.0367923	0.0493328	0	0.0670144	0	0.12422	0.0522576	0.0846534
5835	chr1:19541549-19547611	0	0	0	0.0508176	0.0756912	0	0	0.147665	0	0	0	0.0414591	0	0	0.0730924	0.0813999	0	0.0785694	0.0701017	0.100358	0	0.0752272	0.068064	0.0944144	0	0	0.0792213	0.0530342	0	0	0	0.0956001	0	0.0774151	0.0593062	0	0	0.143391	0	0	0	0	0	0	0	0	0	0.111252
4721	chr19:38935164-38941835	0.132748	0	0	0.0923583	0.0687823	0	0.0674108	0.0447289	0	0	0.128259	0.0376749	0	0	0.0664207	0.07397	0	0.0713978	0.063703	0.0455987	0.0344733	0	0	0.0857966	0	0.0683448	0.0719902	0	0	0.0683667	0	0	0.0337009	0	0.0538929	0.0370592	0	0.195454	0.0580126	0	0.087878	0.117831	0	0	0.074212	0.0741747	0.0624084	0.101097
4818	chr20:15980070-15986191	0	0.143577	0.068738	0.0503279	0.149923	0.062639	0.073467	0.0974948	0	0.0708688	0.069891	0	0	0	0	0	0.128007	0.0778122	0.0694261	0.0993905	0	0	0.0674081	0	0	0.0744849	0	0.0525231	0	0	0.0725026	0	0	0.076669	0.117469	0.0807772	0.06756	0.0710045	0.189673	0	0.0478865	0.0642083	0.145752	0	0	0	0	0
2439	chr7:22703358-22709314	0	0	0	0	0.0770381	0	0.0755019	0.20039	0.0214066	0.0728317	0	0	0	0.20011	0	0.0414242	0	0	0	0	0	0.229697	0.207826	0.192189	0	0	0	0.107956	0	0.153145	0	0.0486506	0	0	0	0.0415073	0	0	0.0649757	0	0	0.0659868	0	0	0.0831194	0	0.0698991	0
5097	chrY:12559210-12565355	0	0	0	0	0	0	0	0	0	0	0	0	0	0.129304	0	0	0	0	0	0	0	0	0	0	0	0	0.0781514	0.052318	0	0	0	0	0	0	0	0	0	0	0	0	0	0	0	0	0	0	0	0
3508	chr11:59923928-59931395	0	0.0588498	0	0.082514	0.061451	0.0513492	0	0	0	0	0	0.0673183	0	0	0.0593411	0.0991285	0	0.0637877	0	0.0407384	0	0	0.110517	0.0383258	0	0	0	0.0430566	0	0	0	0	0	0	0	0.0662183	0.110767	0	0.0518292	0	0	0.105271	0	0.0715012	0	0.0662685	0.111513	0.0451606
2926	chr8:109301077-109307459	0.0693794	0.20656	0	0.14481	0.143793	0	0.140926	0.0935082	0	0	0	0.118142	0	0	0	0.0773191	0	0.149261	0.0665873	0	0	0	0	0	0	0.0714392	0.0752497	0	0.0333626	0	0	0.0454037	0.0704535	0	0	0.0774743	0	0.0681011	0	0	0.0459284	0.184749	0	0	0	0.077533	0	0.0528371
6214	chr1:228676128-228682649	0	0.0673858	0	0.0472412	0	0.117595	0.0689612	0.0457577	0	0	0.0656045	0	0	0.12185	0.203845	0.0756712	0	0	0	0.0466474	0.0352662	0	0	0.0877698	0	0	0.220938	0.0493018	0	0	0	0.088872	0.034476	0.143934	0	0	0.190249	0	0.237388	0.0434598	0	0	0	0	0	0	0	0.051711
2621	chr7:124957311-124967789	0	0.0838801	0.160631	0	0	0.0365947	0.0858412	0.056958	0	0	0.122494	0.0239877	0	0.151675	0	0.0706453	0	0.0454591	0.0405598	0.116131	0	0.0435254	0.0787618	0	0	0.0435153	0.0458363	0	0	0	0	0.110626	0	0.0447913	0.0343137	0	0	0.0414819	0	0.135244	0.13988	0.0375115	0.0425753	0	0.0472509	0.0944543	0.0794711	0.0643686
2658	chr7:143105117-143110504	0.0821916	0	0	0.057184	0	0.0711722	0.0834753	0	0	0.322093	0.0794121	0	0	0.0737475	0.164499	0	0	0	0.157768	0	0	0	0.076591	0.106243	0	0	0	0.119357	0	0	0	0	0.041732	0	0	0	0	0.0806773	0	0	0.05441	0.0729553	0.0828037	0.0495519	0	0	0	0
3030	chr9:26826000-26831465	0	0	0	0.112736	0.167916	0	0.0822841	0.0545978	0	0.0793741	0	0	0	0	0	0.0451452	0	0	0.155516	0.0556594	0	0.0834435	0	0	0	0.0834242	0	0	0	0	0	0	0	0.0858704	0	0.0904717	0	0	0	0.155568	0	0	0	0.146534	0	0	0	0.0617013
3693	chr12:8763633-8766112	0	0	0	0	0	0.309255	0.362714	0.120335	0	0	0	0	0	0.160222	0.178693	0	0	0	0.171382	0	0	0	0	0	0	0.18387	0	0	0	0	0	0	0	0	0	0	0.33355	0	0	0	0	0	0	0	0	0	0	0
1795	chr5:31390075-31399000	0	0	0.0942895	0.0345179	0.0514134	0	0.0503882	0	0	0	0.0479355	0.140806	0	0.133549	0.148944	0.0276455	0	0.106737	0	0	0	0.0510982	0.0462326	0.0641312	0	0.102173	0	0.0360236	0	0.0511027	0.0497268	0.0974048	0.0503814	0	0	0.110804	0.0926736	0.146098	0.0867265	0.095265	0.0328435	0.088076	0	0	0	0	0	0.0377839
569	chr2:71157776-71165609	0.056529	0	0.0537164	0.078659	0.11716	0	0	0	0	0.0553815	0	0.0320866	0	0.0507214	0.0565687	0.0314991	0	0.121615	0.108508	0	0	0.116442	0.0526771	0	0	0	0	0.041045	0	0.058226	0.0566583	0.0369941	0	0.0599142	0	0.0315623	0.0527958	0	0.0494078	0.0361814	0.0374216	0.100353	0	0.0340804	0	0.0631725	0.0531515	0.0430507
2662	chr7:143537704-143543505	0	0	0	0.212414	0.0790961	0.0660937	0.077519	0.051436	0	0.0747774	0	0	0	0	0.0763804	0	0	0.0821038	0	0	0	0	0.142252	0	0	0	0	0	0	0	0.0765014	0	0.116263	0.0808976	0.123948	0	0	0.0749206	0.133423	0.195412	0	0	0	0	0	0.085297	0	0
3595	chr11:93260775-93269187	0.105277	0	0	0	0	0.0911627	0	0	0	0.05157	0	0	0	0.0944613	0.0526755	0	0	0.113245	0.0505202	0.108487	0	0	0.0490517	0.0680417	0	0	0.0570924	0.0382202	0.10125	0.0542188	0.105518	0	0	0.111582	0.128221	0	0	0.103338	0.0920148	0.0673826	0.0696924	0.0467233	0	0.0634698	0.0588544	0.11765	0.098987	0
3553	chr11:78080836-78089728	0.0497974	0.0988395	0.0473197	0.0692921	0	0.0431211	0	0.0671161	0	0.14636	0	0.084797	0	0	0.0498324	0.0554962	0.0220302	0	0.0477934	0	0.0258637	0	0.0464042	0.0321846	0.105763	0.0512759	0.0540109	0.0723145	0	0.102585	0.0499113	0.0325887	0	0	0.0404333	0	0.0465087	0	0	0.0318728	0.0659307	0	0.150505	0	0	0	0	0
1939	chr5:110533798-110545603	0	0.074452	0.0356441	0.0260975	0.0777428	0.0649629	0.114289	0	0	0.036749	0.0724839	0.0425829	0	0.0336567	0	0	0	0.0403495	0	0.0773084	0	0	0.0349545	0	0	0	0.0406843	0	0	0	0.112789	0.0245478	0	0.11927	0.0304568	0.0628305	0.0700664	0.0736387	0.0655701	0.0720257	0	0.0665904	0.0377898	0	0	0.0838376	0.0352693	0.0285668
2288	chr6:110917873-110928127	0.0431837	0.0428562	0	0.0300446	0.0895009	0.0747881	0	0.0873032	0	0	0.0834466	0	0	0.116241	0	0.0240628	0.0382086	0.0929042	0.0414458	0.0296669	0	0.0444761	0.120723	0	0	0	0.093675	0.0627102	0	0	0	0.056521	0.0219261	0	0.0701264	0	0.0806635	0.0847761	0.0377436	0	0.0571742	0	0.0435053	0	0.048283	0.0482587	0.0406035	0.0328873
3850	chr12:80782524-80788903	0.069412	0	0.0659583	0.0482927	0	0	0	0	0	0	0	0	0	0	0.0694607	0	0	0	0	0	0	0	0.0646822	0	0	0	0.15057	0.0503991	0	0	0	0	0	0	0.0563594	0.116266	0.0648279	0	0.0606678	0	0.2757	0.123224	0	0.167389	0.0776085	0.0775695	0.0652647	0.105724
4150	chr14:51748535-51752557	0	0.327733	0	0	0	0	0	0	0	0.215689	0.106357	0	0	0	0	0.0613383	0	0	0.105649	0.151247	0	0.113374	0	0.0711453	0	0	0.238786	0.159854	0	0	0	0	0	0	0	0.184384	0	0.108051	0	0	0	0	0	0	0	0	0.103502	0.167666
2170	chr6:63321318-63335844	0.060969	0.0605066	0	0.0212093	0.0631811	0.0263975	0	0	0	0.0597313	0.0294536	0.0346068	0	0.0820579	0.0305059	0.0339731	0	0.0327918	0	0.0209427	0	0.0941906	0	0.0394049	0	0	0	0	0	0.0627993	0	0.0199499	0	0	0.0495041	0.0340413	0.0284713	0.0299229	0.0532884	0.0195116	0.0201804	0	0.122846	0.0367571	0.0340843	0.0340671	0.0286631	0.023216
1605	chr4:132118161-132125940	0.0569214	0	0	0	0.117973	0	0	0.0767176	0	0.0557659	0.0549965	0	0	0	0	0	0	0.0612296	0.0546307	0	0.0295638	0.2345	0.106085	0.0735777	0	0.293057	0	0.0826598	0.0821157	0.0586301	0.114103	0.0372509	0.0289013	0	0.0462176	0	0	0	0	0	0.0376814	0.0505249	0	0	0	0	0	0
2134	chr6:45236449-45241799	0	0	0	0.0575794	0.0857626	0	0	0	0	0	0	0.0469756	0	0.0742574	0	0.0461155	0	0	0	0.113711	0	0.170474	0.0771206	0	0	0.0852171	0	0	0	0	0	0	0.0420206	0	0	0	0	0.0812351	0.0723342	0.0529705	0.0547862	0.0734598	0.0833763	0.149684	0	0	0	0
973	chr3:67833379-67838443	0	0.08677	0	0	0	0.151422	0.0887986	0.294602	0	0.171316	0.0844763	0	0	0	0	0	0	0	0	0.060066	0	0	0	0	0	0	0	0.063484	0	0	0	0	0	0.0926688	0.0709918	0	0	0	0	0.0559615	0	0	0.0880842	0	0	0	0	0
4606	chr19:9508129-9515054	0	0.0634551	0	0	0.0662598	0.166103	0	0.0430886	0	0	0.0617777	0.0362932	0.016864	0.057371	0	0.0356286	0	0.0687794	0.122734	0.0878528	0	0.0658537	0.0595831	0	0	0.131677	0	0	0	0	0.0640862	0.041844	0.0649299	0.0677689	0	0	0.119435	0.125524	0	0.0409248	0.0423276	0	0	0.0385483	0	0	0.120239	0.0486947
1874	chr5:70512460-70531584	0	0	0	0	0.0239956	0	0.0235171	0	0.0666767	0.0453708	0	0.0131434	0.116036	0	0	0	0.399512	0.0498161	0.0222236	0.047723	0.16837	0.0238485	0	0	0.0983579	0	0	0.0168129	0.222696	0	0	0	0.152841	0.0490842	0.15041	0.0905001	0	0.0454577	0.0202385	0	0.0153287	0	0.0233279	0.0418801	0	0.0258768	0	0.0176345
4792	chr19:57652607-57656643	0.109697	0.217731	0	0.0763208	0	0	0	0	0	0	0	0	0.0289323	0.196855	0.219549	0	0	0.118	0.210566	0	0	0.112981	0.102223	0	0	0	0	0	0	0	0.109948	0	0	0	0	0	0	0	0.383513	0	0	0	0	0	0	0.122589	0.103143	0
2604	chr7:118114164-118121690	0	0.0583885	0	0.0409336	0	0	0.0597536	0	0	0.345842	0.11369	0	0	0.0527902	0.176628	0.0983515	0	0.189863	0.0564669	0.121257	0	0	0	0.190127	0	0	0.127626	0	0	0	0	0	0	0.124716	0.0477711	0.0656992	0	0	0	0	0	0	0	0	0	0	0.0553194	0
691	chr2:136071820-136079325	0	0	0	0.0410481	0	0	0	0.0397591	0	0	0	0.0669775	0	0.0529379	0	0	0	0	0	0	0	0.060765	0	0	0	0.182253	0.127983	0.0856772	0	0.0607704	0.0591342	0.115832	0	0	0.0479048	0	0.165309	0.115824	0.103134	0.15105	0	0	0.118877	0.0355696	0.131932	0.065933	0.0554741	0
4594	chr19:5548576-5553242	0	0	0	0.0660183	0	0.0821675	0	0.063945	0	0.0929631	0	0	0	0.0851407	0	0	0	0	0	0.0651884	0	0.293188	0	0	0	0.0977066	0	0.137796	0.0456296	0.390951	0	0.124196	0	0.100572	0	0	0	0	0.165871	0	0.0628157	0	0	0.0572071	0.106094	0	0	0
4761	chr19:52472461-52485485	0	0.0674841	0	0.0236551	0.140934	0	0	0.0458244	0.0391614	0	0.0657002	0.0578964	0.0179347	0.0305068	0.0340237	0.0378908	0	0	0	0.0233577	0.0353176	0.0350175	0.0316831	0.0219745	0.0577687	0	0	0.0493738	0	0.140082	0.0340776	0.0222504	0	0.144144	0.110426	0	0	0.0667469	0.0297167	0	0	0.120717	0	0.0409959	0.0380148	0.0379956	0.0319684	0.0517865
4521	chr18:26231675-26245800	0	0.0311121	0.02979	0.0436227	0.0649746	0	0.0318395	0.0422528	0	0	0.0302897	0.0177946	0.00826843	0.0843873	0	0.0349375	0	0.0674453	0.0601765	0.0430744	0	0.0645763	0	0.0202617	0	0.0322807	0	0	0	0	0	0	0.0477529	0	0.0509094	0.0175038	0.058559	0.123089	0.0274006	0.100327	0.0622599	0	0.0315834	0.207903	0.140207	0	0	0.0955003
3804	chr12:56492498-56498659	0.143735	0	0	0	0	0.0622324	0.0729901	0.048431	0	0.0704087	0.208312	0	0	0.0644842	0.0719181	0.0400461	0.031794	0.0773071	0	0	0	0	0.0669705	0.0464488	0	0	0.0779485	0.0521822	0	0	0	0	0	0	0.0583533	0.0802529	0	0.0705435	0.188442	0	0.0475756	0	0	0	0.0803542	0	0	0
3032	chr9:27637116-27643620	0	0	0.0646909	0	0.0705481	0.117902	0.0691414	0	0	0	0	0.0386421	0	0.122168	0.204378	0.075869	0	0	0	0	0	0	0	0	0	0.0700994	0	0	0	0.0701218	0.0682338	0.178209	0	0	0	0	0	0	0	0.0435734	0.045067	0	0	0.0820863	0	0.228237	0.192032	0
4545	chr18:42461608-42467075	0	0.0803749	0.0769594	0.0563473	0	0.0701309	0.082254	0.0545778	0	0.079345	0	0.091941	0	0	0	0	0	0.0871189	0	0	0	0.083413	0.150941	0	0	0.0833937	0	0.0588052	0	0.0834203	0	0.106003	0	0.085839	0	0	0.0756405	0	0.0707865	0	0.107228	0	0.0815923	0.0488269	0	0	0.0761501	0
4357	chr16:29709122-29719509	0.0852616	0.0846149	0	0.0593198	0	0	0.0865932	0.0287285	0	0.0417654	0	0.0241978	0	0.038251	0.0426607	0.0712641	0	0.137572	0	0	0	0.0439067	0.0397259	0.0551054	0	0.0438965	0.0462378	0.0619073	0	0	0.0854565	0	0	0	0.103843	0	0	0	0	0	0.0846634	0	0.128845	0.0257013	0	0	0.0400836	0.0324662
1116	chr3:130024231-130029463	0.169252	0.0839843	0	0.0588777	0	0	0	0	0.0974731	0	0	0	0	0.0759319	0	0	0	0.0910312	0	0.116275	0	0	0	0.0546947	0	0	0	0	0	0	0	0	0	0	0	0.14175	0	0.166134	0.0739653	0.10833	0	0.0751163	0	0.0510196	0.0946192	0.0945716	0.0795698	0.0644486
3932	chr13:23525044-23532770	0	0	0	0	0	0	0	0.0386219	0	0	0	0.032531	0	0.0514238	0.057352	0.0319353	0	0.0616496	0	0.0787458	0.0297665	0.177081	0.106813	0	0	0	0	0	0	0	0	0	0	0.0607438	0	0	0.0535269	0.0562559	0.0500919	0	0	0.152614	0.0577386	0	0	0	0	0
923	chr3:38071423-38077656	0	0	0.202509	0	0	0	0	0.0478716	0	0	0.0686353	0	0	0.127479	0.142175	0.0395836	0	0.0764142	0.0681788	0.0488024	0	0.146327	0	0	0	0	0	0	0	0.14634	0.0712001	0.0464889	0	0	0	0	0.0663462	0.0697288	0	0.0909352	0.0940523	0	0	0	0	0	0.133586	0
3604	chr11:95309460-95317607	0.108701	0.0539384	0.0516463	0.0378138	0.112645	0	0.110399	0.109879	0	0.0532473	0.0525126	0	0	0	0	0	0	0	0	0.0746771	0	0.111954	0	0	0	0	0.0589493	0.0394633	0.156814	0	0.0544749	0	0.027596	0.0576053	0.0441302	0	0.101522	0	0	0.0347871	0	0	0	0.032767	0	0.060738	0	0
2921	chr8:106788829-106794857	0.0734531	0	0	0.0511042	0	0	0.0746003	0	0	0	0	0.0416929	0	0	0	0.0409295	0	0	0	0.0504618	0.03815	0.0756514	0.0684479	0.0474734	0	0	0	0	0	0	0	0.240348	0	0	0	0	0	0	0.1284	0.282082	0	0	0.0740001	0.221418	0	0	0	0.167819
6217	chr1:229173971-229180173	0	0.0708512	0	0	0	0	0	0	0	0	0.0689783	0	0	0.064058	0	0	0	0	0	0	0	0	0.0665279	0	0	0	0.0774333	0.0518373	0	0.0735358	0.214668	0.0467212	0	0.151336	0.115935	0	0	0	0	0.0456948	0	0	0.143849	0.0860827	0	0	0	0.380592
4710	chr19:34722067-34727461	0.082085	0.0814625	0	0.0571098	0.0850632	0	0	0	0	0.0804187	0	0	0	0.0736518	0	0	0	0.0882977	0.157563	0	0	0	0.0764916	0.159157	0	0	0	0	0	0	0	0.0537186	0	0	0.133299	0	0.076664	0	0.0717443	0	0.0543394	0.0728607	0	0.0494876	0	0	0	0.125027
3171	chr9:133076137-133085152	0	0	0.0466742	0	0	0	0.0498852	0	0	0	0	0.0278801	0	0	0	0.0821087	0	0	0.0471414	0.0337438	0	0.101176	0.0457711	0.0952365	0	0.101153	0.053274	0.035664	0	0.0505926	0	0	0	0	0.0398817	0.0274245	0.0917485	0	0	0.031438	0.0975469	0.0435984	0	0	0.0549182	0.109781	0	0.0748135
3786	chr12:47445282-47448016	0	0	0	0	0	0	0	0	0	0	0	0	0	0.145284	0	0	0	0	0.310806	0	0	0	0	0	0	0	0.175619	0	0.0778623	0	0.162289	0.105964	0	0	0	0	0	0.158936	0	0.103636	0	0.143723	0	0	0	0	0	0
1922	chr5:101315475-101320608	0	0.0856038	0	0	0.178775	0.149387	0	0	0	0	0	0	0	0	0	0	0	0	0	0	0	0.0888396	0.0803803	0.0557494	0	0	0	0	0	0.0888474	0	0.112899	0	0.0914234	0	0.0481611	0	0	0	0	0	0.0765647	0	0	0	0.0963953	0	0
3825	chr12:64130614-64136206	0	0	0.150479	0	0	0	0.160831	0.106716	0	0	0	0.0898862	0	0	0.158469	0.0441201	0	0	0	0.0543955	0.0411239	0	0	0	0	0	0	0.0574909	0	0	0	0.0518168	0	0	0	0.0442087	0.07395	0	0.0692044	0.101357	0.0524157	0.140563	0	0.0477357	0	0	0	0
6128	chr1:186914433-186922867	0	0	0.0997781	0	0	0.0454625	0.0533213	0.141521	0.0151179	0	0	0.0596009	0	0.0471075	0	0.117019	0	0	0.0503884	0.0360681	0	0.0540726	0.0489238	0.0339321	0	0.0540601	0.0569435	0.114362	0	0	0	0	0	0.0556453	0	0.0586269	0.147102	0.103068	0	0.0336034	0.0347553	0	0	0.0633042	0	0	0.0493644	0.11995
686	chr2:132139787-132147993	0.16188	0.160652	0.153825	0.075084	0.0559176	0	0	0.0727261	0	0	0.0521351	0.0306283	0	0.0484162	0	0	0	0.232176	0.31073	0.0741402	0	0	0.301698	0.0697496	0	0	0	0	0	0	0	0	0	0	0	0	0	0	0	0	0	0	0	0.0325314	0	0	0	0
1178	chr3:152559625-152565247	0	0.0781593	0	0	0	0.136395	0.0799867	0.0530734	0	0	0	0	0	0	0.0788119	0	0	0	0	0	0	0.0811137	0	0	0	0.16219	0.0854204	0.0571842	0	0	0.157873	0	0	0.0834728	0.0639469	0	0	0	0	0.0504082	0.104272	0.0699063	0.158686	0.047481	0	0	0	0.119957
6248	chr1:247024661-247030174	0	0	0.0763174	0.111755	0	0.0695458	0	0	0	0.0786831	0	0	0	0	0	0	0	0	0.0770813	0.0551749	0	0	0.0748408	0.0519074	0	0	0	0	0	0	0	0	0	0	0	0.0448421	0.0750095	0.0788337	0.140392	0	0.0531667	0	0	0.0484196	0	0	0.0755149	0
3149	chr9:115172465-115180335	0.0562633	0.0558366	0	0.0391446	0	0	0	0	0	0.0551212	0	0.0319358	0	0.050483	0	0.031351	0	0.0605217	0.107998	0.115958	0	0.115894	0.157288	0.109091	0	0.0579338	0	0.0408521	0	0	0.112784	0.0368202	0	0	0	0	0	0	0	0.0360113	0.111737	0.0499407	0	0	0	0.188627	0	0.0428483
6253	chr1:247354310-247363372	0.0488634	0	0.0464321	0	0.101272	0	0.099253	0.0329286	0	0	0	0	0	0.0438433	0	0	0	0.105123	0	0	0	0	0.0455337	0	0	0	0	0	0	0.0503302	0.0979502	0.0639549	0	0.0517894	0	0	0	0	0.0854155	0.0625499	0	0.0433723	0.0492272	0.0589177	0	0	0.0459438	0
5863	chr1:38425099-38430783	0	0	0	0	0	0	0	0.0524946	0	0	0	0.0442158	0	0.279579	0.155905	0.0868123	0	0	0	0	0	0.0802291	0.0725897	0.0503461	0	0.0802105	0.168978	0.0565605	0	0	0	0.0509783	0	0	0	0	0	0.0764625	0.0680845	0	0	0	0	0	0	0	0	0.0593244
5298	chrX:7974855-7979912	0	0	0	0	0	0	0	0.236008	0	0	0	0	0	0	0	0.0487869	0	0	0	0.120298	0	0	0	0	0	0.0901535	0	0	0	0.0901824	0	0	0	0.0927971	0.07109	0	0.0817719	0	0	0	0.0579599	0.15543	0.0882061	0.0527848	0.0978929	0.0978437	0	0.0666784
2025	chr5:156657714-156666743	0	0.04867	0.0932036	0.0682408	0	0	0	0.0660978	0	0.0480464	0.0473834	0.0278368	0	0	0.0981526	0	0	0	0.0470683	0	0	0	0.0457001	0	0	0	0.0531914	0	0	0.0505141	0	0.0320943	0	0.103957	0.0796397	0.027382	0	0	0.0857277	0	0.0324652	0	0.0494071	0	0	0.0548055	0.0461117	0.0746975
948	chr3:48722938-48730005	0.0626554	0	0	0.0435919	0	0	0.063634	0.0844458	0	0.0613835	0	0	0.099151	0	0.0626994	0	0	0	0.0601339	0	0	0	0	0	0	0	0	0.0454933	0	0	0.0627987	0	0	0.0664074	0	0.0349829	0	0	0	0	0.124432	0	0	0.0377738	0.140108	0	0.0589118	0
824	chr2:222433749-222441169	0	0.0592225	0.0567059	0.0415183	0	0	0.0606071	0.0402145	0	0	0	0.0338723	0	0	0	0	0	0	0.0572735	0.122989	0	0	0	0	0	0	0	0.0433293	0	0	0	0.0390529	0	0	0.0484535	0.0666377	0.055734	0.0585756	0.260787	0.038195	0	0	0	0.035977	0	0.0666882	0	0.0454466
5642	chrX:111670290-111675965	0	0	0	0.0542825	0.080852	0	0	0.157733	0	0	0.0753827	0.0885718	0	0	0	0.043475	0	0	0.0748814	0.0536001	0	0	0	0	0	0.0803377	0	0	0	0	0	0	0	0	0.0633498	0	0	0.0765837	0	0	0.103298	0	0	0	0	0	0.0733596	0.0594185
2839	chr8:60493461-60499925	0	0.0679799	0.0650911	0	0	0.177947	0.0695692	0	0	0.0671088	0.0661829	0.0777623	0	0.184386	0	0	0	0	0	0	0	0	0	0.0442718	0	0	0.0742952	0	0	0	0.068656	0	0	0	0.0556184	0	0	0	0	0	0	0.0608018	0	0.0412971	0	0.153099	0.0644066	0.104334
814	chr2:218108678-218122049	0	0.0328664	0.0314698	0.0230412	0	0.057355	0.0336348	0	0	0.0973359	0.0319976	0.037596	0	0	0.0662816	0.0369076	0	0.0712483	0.0317848	0.0227516	0.0172006	0.0341088	0.0308609	0.0214042	0	0	0	0.0240463	0	0.0341118	0.0663867	0	0	0.105302	0.02689	0.0554724	0	0.0650148	0	0.0211969	0.0219235	0	0	0.019966	0	0.111029	0.0311389	0.0756639
5875	chr1:46325548-46332308	0	0	0.0622414	0	0.135754	0	0.0665234	0	0	0	0	0.0743578	0	0.0587711	0	0.0364981	0	0.140916	0	0.0449984	0	0.0674608	0	0.127001	0	0.13489	0.0710425	0	0	0	0.0656502	0	0	0	0.106367	0	0	0	0.057249	0.0419235	0	0.11628	0	0	0.0732351	0	0	0.0498831
4309	chr15:89232355-89239939	0	0	0.0554798	0.0406206	0.0605031	0.101114	0.0592966	0	0	0	0.112821	0.03314	0	0.104773	0.0584257	0	0	0	0	0.04011	0	0.0601322	0	0	0	0	0	0.0423924	0.112302	0	0	0	0	0	0	0.0325984	0.054529	0	0	0.0373692	0	0.0518238	0	0.0703983	0.0652791	0	0	0.088928
3158	chr9:122530593-122536151	0	0	0	0	0.0825536	0.0689829	0	0	0	0.0780462	0	0.0904359	0	0	0	0	0	0	0	0	0	0	0	0	0	0	0	0.0578425	0	0	0	0.0521338	0	0	0	0	0.297609	0.156391	0.348139	0.0509885	0.0527363	0	0.24077	0.0960552	0	0	0	0
2427	chr7:12289622-12296117	0	0.0676555	0	0	0.0706459	0	0	0	0	0.0667886	0	0	0	0.122337	0	0	0	0	0.196287	0	0	0	0.0635271	0	0	0	0	0	0	0	0	0	0	0.0722549	0	0.0761266	0.0636703	0.200749	0.178753	0.0436338	0	0.0605116	0.0686802	0.0411	0	0	0	0
6028	chr1:117815373-117821863	0	0	0	0	0.0707003	0.0590781	0	0.0459762	0	0	0	0.0387254	0	0.0612158	0	0	0	0.0733887	0.130959	0	0	0	0	0	0	0	0.147995	0.0495373	0	0	0.068381	0.0446482	0	0.0723105	0	0.114278	0	0	0	0.0873348	0.0451642	0	0.137466	0	0	0	0.0641487	0
4886	chr21:28301127-28307279	0	0	0	0	0	0	0	0	0	0	0	0	0	0.0645785	0.144047	0	0.573128	0.0774202	0	0.0494449	0	0.0741268	0	0	0	0	0	0	0	0	0	0	0	0.0762827	0.0584387	0	0.0672196	0	0.062906	0.0460662	0	0.0638848	0	0	0	0	0	0
5439	chrX:64781085-64789474	0.0527829	0	0.0501566	0	0.0546979	0.0914126	0.0536073	0.0711398	0	0.103423	0	0	0	0	0	0	0	0	0.0506587	0.0725231	0	0	0	0	0	0	0	0	0	0.0543674	0	0.0345425	0	0	0.0428574	0.0294707	0.049297	0.103621	0.0461335	0	0.104825	0.0468514	0.053176	0.0636438	0.0590158	0.0589861	0.0496292	0.0401978
6068	chr1:154671475-154677936	0	0.0680114	0.0651214	0.14304	0	0.0593432	0	0	0	0	0	0.0777984	0	0.0614905	0	0.0381869	0	0	0	0	0	0	0.127723	0	0	0	0	0.0497596	0	0	0	0	0	0	0	0	0	0.0672685	0	0	0	0	0.0690416	0.0826325	0.153247	0.0765852	0	0
726	chr2:158847011-158849245	0	0	0.188284	0	0	0	0	0	0	0	0	0.112468	0	0.177786	0	0	0	0	0	0.272245	0	0.204073	0	0	0	0	0	0	0	0	0	0	0	0.210008	0.160883	0.11063	0.185057	0	0	0	0	0	0	0.119457	0	0	0	0
1315	chr4:9760952-9765008	0	0	0.103725	0	0	0	0.110861	0	0	0	0	0	0	0.195884	0	0	0	0	0	0.07499	0	0	0	0	0	0	0.118393	0.158514	0	0	0	0	0	0	0.0886303	0	0	0	0	0.0698657	0	0	0.10997	0	0.122046	0	0.102635	0
3334	chr10:96731990-96738173	0	0.0710689	0.136098	0	0	0	0	0	0	0	0	0	0	0	0	0	0.221766	0.0770321	0	0.049197	0	0.0737552	0.0667323	0.0462835	0	0	0	0	0.0344362	0.0737617	0	0	0.0363603	0.0759003	0	0	0	0	0	0.0916705	0.0474064	0.127129	0.0721453	0	0.0800683	0.080028	0.0673333	0.109075
3529	chr11:67978502-67982041	0	0.12415	0.237748	0	0.129637	0.108326	0	0	0	0	0	0	0	0	0	0	0	0	0	0.0859419	0	0	0.116574	0	0	0.128813	0	0	0	0	0	0	0	0	0.101574	0	0	0.122794	0.109339	0	0	0	0.12603	0.0754196	0	0	0.117624	0.095271
3941	chr13:34798094-34802020	0	0	0	0.0784587	0.116862	0	0.114531	0	0	0.220962	0	0.0640098	0	0.101184	0	0	0	0	0	0	0	0	0	0	0	0	0.244624	0	0	0	0.113028	0	0	0.119523	0.0915644	0	0	0	0	0	0.0746527	0	0	0	0	0	0	0.0858822
2061	chr6:3167220-3173917	0.0661165	0	0.0628268	0	0.0685153	0	0	0	0	0	0.0638806	0.0750572	0	0.0593239	0	0	0	0	0.190367	0.181687	0	0	0	0	0	0	0.0717108	0	0	0.0681013	0	0	0	0	0	0	0	0	0	0	0	0	0	0	0	0	0	0.100704
4410	chr16:72064269-72073376	0.0972439	0	0	0.101485	0.050386	0.0842064	0.0987626	0	0.0140008	0	0	0.0275984	0	0.0436267	0.145968	0.0541862	0	0.052302	0.0466652	0.100209	0	0	0	0.0314248	0.0619596	0.0500655	0.0527359	0	0	0	0	0	0	0	0	0	0.0454109	0.0477261	0	0.0311205	0	0	0	0.0586266	0	0.0543361	0	0
3539	chr11:71586230-71591666	0.0814509	0.0808332	0.154796	0.0566686	0	0	0	0.054889	0	0.159595	0	0.0924652	0	0	0.081508	0	0	0	0	0	0	0	0	0.0526425	0	0.0838692	0	0	0	0	0	0	0	0.0863284	0	0.136431	0.0760718	0.0799502	0	0.104265	0.0539196	0	0	0.0491053	0	0.182046	0.0765843	0
5184	chrY:19647506-19651863	0	0	0	0	0	0	0	0	0	0	0	0	0	0.0911775	0.101689	0.113246	0	0	0	0	0	0	0.0946931	0.0656763	0	0	0	0.368915	0	0	0	0	0	0	0	0	0	0	0	0	0	0	0	0	0	0	0	0.0773886
2474	chr7:42869813-42876404	0.0671797	0	0	0	0	0.0581729	0.0682289	0.0452718	0	0	0	0	0	0	0	0	0	0	0.128952	0	0	0	0	0.0434189	0	0	0	0.0487783	0	0	0.202	0	0	0	0	0	0.125486	0	0	0	0.0444722	0	0	0	0.0751126	0	0.0631658	0
1566	chr4:112207493-112213993	0	0.0676034	0	0	0	0.117974	0	0.0459055	0	0.0667372	0	0	0	0.122243	0	0	0	0.0732759	0.130757	0	0.0353801	0	0	0	0	0	0	0	0	0	0.0682758	0	0	0	0.0553105	0.038034	0	0	0	0.0436002	0.0450947	0.0604651	0	0	0.076164	0.0761257	0.06405	0.155634
3847	chr12:79539848-79545636	0	0.0759181	0	0.0532229	0	0.132484	0.077693	0	0	0	0	0.0434214	0.0201762	0.0686391	0.0765519	0.0852527	0	0.164576	0	0.0525539	0	0.315151	0	0	0	0.0787695	0	0	0	0	0	0.0500625	0	0.0810792	0	0	0	0.0750888	0	0.0489627	0	0	0.077068	0.0461195	0	0.0854886	0.143855	0
3319	chr10:90135149-90145087	0	0	0.0423397	0	0.13852	0	0.0452525	0.0900789	0	0	0	0.0252909	0	0.159916	0	0.0248278	0	0	0.0427635	0.0306102	0.0231418	0.0458902	0	0.0287974	0	0	0	0.032352	0	0.0458942	0.0446585	0	0.0226232	0.0472248	0	0.0248777	0	0	0	0.0285185	0.14748	0	0	0.0537248	0.0498181	0.149379	0	0.101799
3594	chr11:93103974-93117345	0.0993528	0	0.125879	0.0230412	0	0.0286775	0.0336348	0	0	0.0973359	0	0	0	0	0	0	0	0	0	0.0227516	0	0.102326	0	0.0428085	0	0.0341009	0	0	0	0.0341118	0	0.0650191	0	0.0351008	0.13445	0.0369816	0.0309305	0.0325074	0	0.0635907	0.0657705	0	0	0.019966	0.111085	0	0.0622777	0.0504426
2744	chr8:17907211-17916624	0.141124	0.0466847	0.0894018	0	0	0.0814693	0	0.0317008	0	0	0.0454507	0	0	0	0	0	0.020811	0	0	0.0323172	0.0977294	0.0968987	0	0	0	0	0	0.0341562	0.0452419	0.0484536	0.0471491	0	0.0238849	0.0498585	0	0.026265	0	0.0461748	0	0.0301089	0	0.0835104	0.0473918	0.056721	0	0	0.0442308	0
1118	chr3:130141303-130147638	0	0.138728	0.0664164	0.048628	0.14486	0.0605233	0	0.0942019	0	0	0.0675304	0	0	0	0.139886	0.0389463	0	0.0751841	0	0	0	0	0	0	0	0	0	0.0507491	0	0.0719922	0	0	0	0	0	0	0	0	0.0610891	0.0447357	0	0.0620397	0	0.0842757	0	0	0.065718	0
1444	chr4:68570072-68576698	0	0	0	0	0	0	0	0	0	0	0	0	0	0	0.0668718	0	0	0.0718827	0	0.0459083	0.0347074	0.13765	0.186814	0.129569	0	0	0	0	0.0321342	0.344155	0	0.262392	0	0	0	0	0	0	0	0	0	0	0	0.0402875	0.0747159	0	0.125664	0.30535
792	chr2:206253842-206267606	0	0.0319281	0	0	0.0333393	0	0	0.0433609	0.00926402	0.126076	0	0.0182613	0.00848528	0.0866004	0	0	0.0284656	0.0346071	0.0308773	0.044204	0	0.0331349	0.0299798	0.0207931	0.0409973	0	0.0348942	0	0.185648	0.0331378	0	0	0.0326701	0	0	0	0.0600947	0	0.0281192	0.0617752	0	0.0285567	0	0	0	0	0	0.0245012
6218	chr1:229412496-229420609	0	0.162493	0.0518627	0.0759446	0	0	0	0	0	0.0534704	0	0.0309794	0	0.0979422	0.0546166	0	0	0	0	0	0.0283468	0	0	0.105824	0	0.0561987	0	0	0	0	0	0	0	0	0	0	0	0	0	0.0698657	0	0.0484451	0	0	0	0	0	0.124695
4842	chr20:41684924-41695822	0	0.0806478	0.0386104	0	0	0.0351845	0	0	0.0117001	0.0398072	0.039258	0	0	0	0	0.022641	0.143804	0.0874147	0.0389968	0	0.105517	0	0	0.0262609	0.0172593	0.0836768	0	0	0.0390776	0.0837035	0	0.0265907	0.144414	0	0	0	0.0758973	0.0797668	0.0355134	0.0260065	0	0.036066	0	0	0	0.0454072	0	0
5173	chrY:18944747-18949879	0	0	0	0	0	0	0	0	0	0	0	0	0	0.232234	0	0.048074	0	0	0	0	0	0.355428	0.0803959	0	0	0.177673	0	0.125286	0	0	0	0	0	0	0	0	0	0	0	0	0	0	0	0	0	0	0	0
1143	chr3:143797679-143805775	0	0.108556	0.155915	0.076104	0.0566773	0.0473602	0	0.0368571	0	0	0.15853	0	0	0.0490739	0	0	0	0.0588325	0.0524919	0	0	0	0.0509661	0	0	0	0	0.0397118	0	0	0	0.0715849	0.0277698	0	0.0444082	0.0305371	0	0	0	0	0	0.0970936	0.0551002	0	0.0611513	0	0.0514251	0
3215	chr10:27465310-27470939	0	0.0780622	0.074745	0	0	0	0	0	0	0	0	0.0446477	0	0	0	0.0438302	0	0	0	0.162114	0	0	0	0	0	0.0809941	0	0	0	0	0	0.0514763	0	0.083369	0.0638674	0.0439181	0	0	0	0	0	0	0	0.142266	0	0.0879029	0	0.059904
2937	chr8:114281593-114286513	0.0899916	0	0	0.0626107	0	0	0	0	0	0	0	0.0510804	0	0	0	0	0	0	0	0.0618237	0	0	0	0	0	0	0.0976059	0	0	0	0.0901974	0	0	0	0.0730691	0	0.0840484	0.0883335	0	0.0575991	0.0595735	0	0	0	0	0.100568	0.0846147	0.0685347
2365	chr6:144923392-144932448	0.0977914	0.0485249	0.0464629	0	0	0	0	0	0	0.0479031	0	0	0	0	0.04893	0	0	0	0.046928	0	0	0.0503591	0	0	0	0	0.0530329	0.0355025	0	0.0503635	0.147023	0.127995	0	0	0.0794023	0.081901	0	0	0	0.0312957	0	0	0	0	0	0	0	0.0372374
5094	chrY:12355053-12358537	0	0	0	0	0	0	0	0	0	0	0	0	0	0.114018	0	0	0	0	0	0	0	0	0	0	0	0	0	0	0	0	0	0	0	0	0	0	0	0	0	0	0	0	0	0	0	0	0	0
1264	chr3:186865307-186875043	0.045481	0.0451361	0	0	0.0471311	0	0	0	0	0	0	0.0258156	0.0119955	0.0408084	0	0.0253429	0	0.0978466	0.0436507	0.0312452	0	0	0	0.0293948	0	0.0468313	0.0493292	0.0330232	0	0	0.045585	0	0.0230926	0	0	0	0	0.133929	0.0397515	0.0291101	0	0.0403701	0	0.0274197	0	0.152478	0.0427636	0
2119	chr6:32493818-32501013	0	0	0.0584789	0	0	0	0	0	0	0	0	0	0	0	0	0	0	0	0	0	0	0	0	0	0	0.31684	0.066748	0.0446841	0	0	0	0	0	0.0652262	0.199874	0	0.0574767	0.0604071	0.0537883	0.0393893	0	0	0	0	0.068808	0	0.0578639	0.0468676
937	chr3:46046257-46054342	0	0	0	0	0	0	0	0.0369072	0	0	0	0.0310867	0	0	0.0548057	0	0	0.0589125	0	0	0	0	0	0.0353967	0	0.0563933	0	0	0.0263361	0	0	0.107523	0	0	0.0444686	0	0.153451	0.0537583	0.047868	0.105161	0	0	0.0551752	0.0990547	0	0	0	0.0834181
2963	chr8:131740745-131747161	0.0690118	0.0684884	0	0	0	0	0.0700896	0	0	0.0676108	0.066678	0	0.0182016	0.0619217	0.0690602	0	0	0	0	0	0	0	0.0643092	0.044603	0	0	0.149702	0.100217	0	0.0710834	0	0	0	0.0731444	0	0	0	0	0	0	0.0913701	0.122513	0.0695257	0.041606	0	0	0	0
576	chr2:75210983-75219555	0	0	0.049086	0	0	0	0.104926	0	0	0.101215	0	0	0	0	0	0.0287838	0	0.0555659	0.0991547	0	0	0.0532022	0	0	0	0.0531899	0	0.0375069	0	0	0	0.135221	0.026228	0.0547495	0.0838851	0	0	0	0.0451488	0.0330625	0	0	0.0520409	0	0	0	0.0485698	0
6165	chr1:205890691-205905299	0	0.060167	0	0.0421805	0.0314132	0.0262493	0.0307868	0.0204279	0	0.029698	0	0.0344126	0	0	0.0303347	0.0168912	0	0.0652155	0	0	0.0157441	0	0.0282478	0.0391837	0	0	0	0	0	0.0312234	0.0303827	0.0198379	0.0307827	0	0.0246131	0.0507754	0.0566229	0	0	0.0194021	0	0.0269069	0.0610783	0.0365508	0.0677859	0	0.0570044	0
5494	chrX:75642664-75649367	0.0660574	0	0.125541	0.0459587	0	0	0	0.133546	0.247278	0.0647164	0.0638235	0	0	0.177812	0	0	0	0	0	0	0	0	0	0	0	0	0	0	0	0.0680403	0	0	0	0	0	0.0368823	0	0	0	0	0.0437293	0	0	0	0	0	0.0621105	0
1728	chr4:184736175-184745240	0	0	0.0928335	0	0	0.0422982	0	0	0	0	0	0.110905	0.0772997	0.0876575	0	0.0272186	0	0	0.0468814	0.0335577	0	0	0	0.0631408	0	0.0502974	0.0529802	0.0354673	0	0.0503135	0.0489589	0	0	0	0	0.0545465	0	0	0.0426936	0.0625292	0	0.0867159	0	0.0294491	0.0546153	0.0545878	0	0.0372005
690	chr2:134803886-134811555	0	0	0	0.120511	0	0.0499968	0.0586395	0	0	0.0565657	0.0557852	0	0	0	0	0.0321726	0	0	0	0	0	0	0.0538034	0.074633	0	0.118904	0	0.0838453	0	0	0	0.0377851	0	0	0.093761	0.0322372	0	0	0.151393	0	0.0382218	0	0	0.0348091	0	0	0	0.0439712
5305	chrX:16175752-16184467	0.0508087	0	0	0	0	0	0	0	0	0.0995545	0	0	0	0.0911775	0	0.0283116	0	0	0	0	0	0	0	0	0	0.104634	0	0	0	0.0523339	0	0	0	0.0538513	0.0412544	0.0567368	0	0	0.133224	0.0325201	0	0	0	0.0306317	0.0568084	0.0567799	0	0
3908	chr12:120606997-120614359	0.0601451	0.059689	0	0	0	0	0	0.0405312	0	0.0589242	0	0.0341392	0	0	0.0601873	0	0	0	0.0577246	0.0413193	0	0	0.112094	0.0388724	0	0	0	0.0873412	0	0.0619506	0.0602827	0.0393605	0	0	0.0488352	0.0671626	0.056173	0	0.0525683	0	0	0	0	0.108781	0.0672474	0	0	0.0458046
5488	chrX:75171788-75179180	0	0	0	0	0	0.0518701	0.0608366	0.0403668	0	0	0	0.0340006	0.0157987	0	0.0599431	0.0667561	0	0.0644348	0	0	0	0	0.0558193	0	0	0.0616795	0	0	0	0	0	0.0392008	0	0	0	0	0	0	0.052355	0	0.0793077	0.0531697	0	0	0	0.0669408	0.0563221	0
3120	chr9:98266814-98271182	0	0.100593	0	0	0	0.263316	0	0	0	0.0993039	0.0979337	0.115068	0	0	0	0	0	0	0	0	0	0	0	0	0	0	0	0.0735973	0	0.104404	0	0	0	0.107431	0	0.056594	0.0946675	0.198988	0	0	0	0	0	0	0	0	0	0
2136	chr6:47634877-47647929	0	0	0.0322389	0	0	0.0587567	0.10337	0	0	0	0	0.0192574	0.00894812	0	0.0679015	0	0.0300183	0	0	0	0.0176209	0.0349423	0.0316151	0.0219273	0	0	0	0.0246339	0	0.0349454	0.0340045	0.0444054	0	0.0359586	0	0.0568281	0.0633727	0	0.0889589	0.17372	0.112296	0.0301144	0	0.122724	0	0	0	0
4837	chr20:39721012-39727464	0	0.0681063	0	0	0	0	0.0696986	0	0	0.0672336	0	0	0	0	0.13735	0.0382402	0	0	0	0	0	0	0	0	0	0	0	0	0	0.0706869	0.0687837	0.0449111	0	0	0	0	0.0640945	0.269449	0.179944	0.131774	0.0454302	0.0609148	0	0.0413739	0	0	0	0.052264
5304	chrX:16038040-16051365	0	0	0.0631569	0.0231208	0	0.0287765	0.0337509	0.0223947	0	0	0.0321081	0.0188629	0.00876481	0.0894533	0	0.0555524	0.0294033	0.0357471	0.0318945	0	0	0.068453	0	0.0214781	0	0	0.0720874	0.0482585	0.0319606	0.0342295	0.0333079	0	0.0168732	0	0	0.0371093	0.0931117	0	0	0	0.0659975	0.0294975	0.0669588	0.0601048	0.0743122	0.111412	0.0312464	0.0759251
813	chr2:215922303-215930906	0	0.102159	0	0.0358098	0.0533375	0.0445695	0.0522739	0	0	0.0504252	0	0.0292151	0	0.0461822	0	0.0573603	0	0	0.0493987	0	0	0.106021	0	0	0	0.0529982	0.055825	0.0373718	0	0	0	0.0336834	0	0	0.0835828	0	0	0	0	0	0	0.0456861	0	0.0310304	0.0575479	0	0.0483948	0.0783959
6164	chr1:205859304-205864229	0.0899002	0.0892184	0	0.0625471	0	0	0	0	0	0	0	0.0510286	0	0	0	0	0	0.193409	0.0862823	0	0	0	0	0	0	0	0	0	0	0.092599	0	0	0	0	0	0.0501947	0	0.0882439	0.078575	0	0.059513	0	0	0.108399	0.201032	0	0	0
3083	chr9:81009358-81015277	0	0	0	0	0	0	0	0	0	0	0	0	0	0	0.074858	0	0	0.0804673	0.071795	0	0	0	0	0	0	0.154053	0	0.0543153	0	0	0	0.195819	0	0	0	0	0	0	0	0	0	0	0.0753626	0	0	0	0.070336	0.0569695
1316	chr4:10170014-10172994	0	0	0	0	0	0.12864	0	0.100111	0.0855547	0.291083	0.143533	0	0	0	0	0	0	0	0	0	0.154315	0.153003	0.276868	0.0960139	0.0631028	0	0	0	0	0	0	0	0	0	0	0	0	0	0	0	0	0	0	0	0	0	0	0
4567	chr18:57064652-57072399	0	0	0	0	0.0592302	0	0	0	0	0	0	0	0	0	0.17159	0.0955462	0	0	0	0	0	0.117734	0	0.0369408	0	0	0	0	0	0	0	0	0	0	0	0.0319126	0	0	0.0499562	0.073166	0	0	0.115164	0	0.0639058	0	0.161224	0
3392	chr11:5928629-5938951	0	0	0.0407647	0.0298467	0	0.0371477	0.0435692	0.0578188	0	0	0.0414485	0.0243502	0	0.0384919	0	0.0717128	0	0.0461461	0.205864	0	0	0.0441831	0.039976	0	0.0182224	0	0.046529	0	0	0	0.0429973	0.0561487	0	0	0	0	0.0400661	0.0421088	0.037495	0.0274576	0.0283988	0	0.0432187	0	0	0.0479408	0.0806721	0
2357	chr6:141955572-141965391	0.0450966	0.0447546	0.0428528	0.0313755	0	0	0.0916018	0.0607804	0	0.0441811	0	0.0255974	0	0	0	0	0.0199505	0.0485098	0	0	0.0468444	0.0464463	0.0420237	0	0.0383115	0	0	0.0982321	0	0	0.135599	0	0	0	0.0366164	0	0	0	0.078831	0.0865922	0	0	0	0	0	0.100793	0.0424021	0.103032
3642	chr11:110396311-110409362	0	0.101017	0.0644827	0	0	0.117522	0	0	0	0	0	0.0385177	0	0	0	0.0378124	0	0	0.0651282	0.0699282	0.0176223	0	0.0948527	0.021929	0	0	0.0368004	0	0	0	0.0340071	0.0444088	0	0.0359614	0.0550986	0.0568325	0.0633776	0	0.0296553	0.0217166	0.022461	0	0.0341822	0	0	0	0.0319023	0.0258397
3100	chr9:90223853-90227706	0.114906	0.114035	0	0	0	0	0	0	0	0.112574	0	0	0	0	0	0	0	0.123603	0	0	0	0	0	0	0	0	0.124629	0	0	0	0	0	0	0.121787	0.186597	0.0641565	0	0	0	0	0.0760667	0.101994	0	0	0	0	0	0.262527
2477	chr7:43810663-43821357	0	0.0821861	0	0.0576171	0.0429094	0.0358556	0	0	0	0	0	0.0235032	0	0	0.0414361	0.0461457	0.146547	0	0	0	0	0.0426463	0.0385855	0.0802854	0	0	0.0898212	0.0300651	0	0	0.124505	0.0270979	0	0	0	0.0231191	0.0386725	0	0	0.0265026	0.0548221	0.0367539	0	0	0.0462966	0	0.038933	0
3042	chr9:31326353-31334694	0	0.210736	0.151336	0.0369345	0.0550127	0	0	0.0357746	0	0	0.0512913	0.0301327	0	0	0	0.0295809	0	0	0.0509502	0	0	0.0546754	0	0	0	0	0	0.0385455	0	0	0.106416	0	0	0	0	0	0.0495807	0	0.046399	0	0.0351428	0	0	0	0	0.0593255	0	0.0404291
3793	chr12:50902560-50912117	0	0	0	0	0.0480138	0	0	0.0312232	0	0	0.0447659	0	0	0	0.139096	0.0258175	0	0.0498395	0	0	0.0240642	0.0477194	0.0863512	0	0	0.0477084	0.050253	0.0336416	0	0	0.0464387	0	0	0	0.0376201	0.0517387	0.0865457	0	0.0809919	0.0296553	0.0306718	0.0411261	0.0466778	0.0558664	0	0	0	0.0705711
4539	chr18:35353552-35361787	0.0537699	0.106724	0	0	0.0557207	0	0.0546096	0.036235	0	0	0	0	0	0.0964914	0	0.0599232	0	0	0	0.0369396	0.111708	0.0553791	0.100212	0	0	0	0	0.0390416	0.0258564	0	0.107786	0.0351884	0	0.0569898	0	0	0	0.105558	0.0469962	0	0.106785	0.0477275	0	0.0324169	0	0	0	0
1171	chr3:151465884-151475799	0	0	0.0424379	0	0	0	0	0	0	0	0	0	0	0.0400718	0.0446913	0.0497709	0	0	0	0.0306812	0	0	0.166467	0	0	0	0	0	0	0	0	0	0	0	0.0725239	0.0997415	0	0	0.0390339	0	0.0886933	0.0396413	0.0449926	0.0269247	0	0	0.125975	0
4612	chr19:9713465-9716784	0	0	0	0	0	0	0.135471	0	0	0.13068	0	0.0757128	0	0.119684	0.133482	0.0743265	0	0.143484	0	0	0	0	0	0	0	0	0	0	0	0	0	0	0	0	0	0	0	0	0	0	0.0883015	0	0	0	0	0	0	0
5404	chrX:56938094-56949398	0	0.0777514	0.0372237	0.0272541	0	0.0339209	0	0	0	0	0	0.08894	0	0.0351483	0.0392003	0.0436557	0.0346598	0	0.112789	0.053823	0	0	0	0.0506355	0	0	0.0424873	0	0	0	0	0	0.0198896	0.0415186	0	0	0.0731715	0.0384511	0.034238	0.0250725	0	0.0347708	0.0394645	0.0944664	0.0437985	0	0	0
5508	chrX:77077095-77086082	0.0492711	0	0.0468196	0.0342798	0.0510587	0.0426653	0.150122	0	0	0	0	0	0	0.0442091	0.147917	0.0274548	0	0	0.0945764	0	0	0.0507457	0.0459137	0.0318444	0	0	0	0	0.118465	0.0507502	0	0.0644886	0	0.0522216	0	0.0550198	0	0.0967266	0	0	0	0	0	0	0	0	0	0.0375233
1685	chr4:164995690-165005061	0.0472523	0.0468939	0	0.0328753	0	0	0	0.0318429	0	0.138879	0	0	0.0623132	0	0.0472854	0	0	0.0508287	0	0	0.0490837	0	0	0	0	0	0.0512504	0	0	0	0.0473603	0.0309231	0	0	0.0767335	0	0	0.0463817	0	0.0302438	0.0312805	0.0419423	0.0476042	0.0284876	0	0	0	0.0719717
5639	chrX:109866294-109870869	0	0.0960424	0	0	0	0	0	0	0	0	0	0	0	0	0	0.0539257	0	0	0	0	0	0	0.0901819	0	0	0	0	0	0	0	0.0969976	0	0	0	0	0.0540339	0	0	0	0.0619417	0.12813	0	0	0	0	0	0	0
5523	chrX:80312121-80317995	0	0	0	0	0.0781133	0.0652725	0	0	0	0	0	0	0	0	0.0754313	0	0	0	0.217035	0	0	0	0.0702421	0.0487179	0	0.0776164	0	0	0	0.0776413	0	0	0	0.0798924	0.122408	0.0420867	0	0.0739897	0.0658826	0	0	0	0	0.0454443	0	0	0	0.0574058
644	chr2:106211565-106215027	0	0.12691	0	0	0	0	0	0.0861772	0	0.125284	0.123555	0	0	0	0	0	0	0	0	0.0878528	0	0	0	0.0826501	0	0	0	0	0	0	0	0	0	0.135538	0	0	0	0.125524	0	0	0	0	0	0	0	0	0.120239	0.0973893
3684	chr12:7588230-7607747	0	0.0675515	0	0	0	0.0196473	0.0230436	0.0152901	0	0.0444573	0.0219219	0.0128787	0	0.0203582	0	0	0	0	0.0435523	0.0155874	0.0707058	0.0233683	0	0.0293286	0	0.0233629	0	0.0329487	0	0	0.0227411	0.0593937	0.0115203	0	0.0184226	0.0760096	0.0211908	0.0222712	0.0198309	0.0290445	0.01502	0.0201395	0	0.0410368	0.0253685	0.0507115	0.0213336	0.0172794
2872	chr8:81898016-81903943	0.0747045	0.074138	0	0.0519749	0	0.0646889	0	0	0	0.073188	0	0	0	0.0670296	0	0.0416268	0	0	0	0	0	0.0769404	0.139228	0	0	0.0769225	0	0.054242	0	0	0	0	0	0	0	0	0	0	0.0652936	0	0.0494536	0.0663096	0	0	0	0.083484	0	0
1054	chr3:104439933-104445795	0	0.14992	0	0.0525511	0	0	0	0.0509008	0	0	0	0	0	0	0	0	0	0	0	0	0	0.0777933	0	0	0	0	0	0	0	0	0	0.0494306	0	0	0.0613292	0.0421728	0	0	0.0660175	0	0.0500019	0.0670448	0.152191	0.0455374	0	0	0.0710198	0
3540	chr11:71612092-71615634	0	0	0	0.0869622	0	0	0	0	0	0.122455	0	0	0	0.112151	0	0	0	0	0	0.0858691	0	0.128733	0	0	0	0	0	0	0	0	0	0	0	0.132477	0	0	0	0.12269	0.109247	0	0	0	0.125923	0	0	0.139682	0	0
3628	chr11:103572407-103579117	0.0659885	0	0	0	0	0.0571414	0	0	0.038003	0.0646489	0	0	0	0	0	0	0	0	0.0633328	0.0453337	0	0.135927	0.184476	0.042649	0	0	0	0.0479134	0	0	0	0.129554	0	0	0.0535797	0	0	0	0	0.0422359	0	0	0.0664799	0	0	0	0.0620457	0
4362	chr16:30615777-30624188	0	0	0	0	0	0.13676	0.0534671	0.0354769	0	0	0	0.0298819	0	0	0	0	0	0	0	0.0723334	0	0	0	0.0340249	0	0.0542079	0.0570992	0.0764495	0	0	0	0.0344522	0	0.0557974	0	0.0293936	0.0491681	0.0516749	0.0460129	0.101086	0	0.140187	0.0530369	0.0634773	0	0	0	0
6181	chr1:211687139-211694456	0.060515	0.060056	0.057504	0	0	0	0.12292	0.081561	0	0.0592865	0	0.0343491	0	0	0	0	0	0	0.0580796	0	0	0	0	0	0	0.0623116	0	0	0	0.186995	0.121307	0	0	0	0	0.0337878	0	0	0.0528916	0.0387326	0.0400603	0	0	0.0729668	0	0	0	0.0921725
1259	chr3:185372296-185380593	0.0533681	0	0.0507127	0.111391	0	0.138639	0	0	0	0.156854	0	0.0302924	0	0	0.106811	0	0	0	0	0.109991	0	0.0549653	0	0	0	0.0549526	0	0	0	0	0	0	0	0.169692	0	0	0	0	0	0.0341582	0.0353291	0	0	0.0321747	0.0596701	0	0	0.0406434
5895	chr1:55021044-55033673	0	0.0347973	0	0.0731846	0	0.0303623	0.0356109	0.0236288	0	0.0687029	0.0338775	0	0.00924781	0.0314609	0	0	0	0	0.0336521	0.0240882	0	0	0.065348	0	0	0.0722085	0.11409	0.0509179	0	0	0	0	0	0	0	0.0195771	0	0	0	0.0224422	0	0.093369	0.0706487	0	0.0392037	0.039184	0.0659365	0
2867	chr8:79386104-79391685	0	0	0	0	0	0	0	0.0534632	0	0	0.229957	0	0	0.0711844	0	0.0442071	0	0	0	0	0	0.0817095	0.0739291	0	0.0336993	0	0.0860478	0	0	0	0	0.051919	0.0402817	0	0.0644166	0.0442958	0	0	0.0693408	0	0	0	0	0	0	0	0	0
5558	chrX:85811990-85819969	0	0	0.0527336	0	0	0.0961092	0	0	0	0.163105	0	0.0944987	0	0.0497934	0.0555337	0.0309228	0	0	0	0.0381246	0	0.0571557	0.0517133	0.0717337	0	0	0	0	0	0.114321	0	0	0	0.058818	0	0	0.0518298	0.0544723	0	0.0710389	0	0	0	0.0334568	0	0.0620167	0	0
2375	chr6:152037902-152042443	0	0	0	0	0	0	0.0990236	0	0	0	0	0	0	0	0	0	0	0	0.093577	0.0669825	0	0	0	0	0	0	0	0	0	0	0	0.127614	0	0	0	0.0544384	0.182123	0.191409	0.0852181	0	0	0	0	0.176344	0	0	0	0.148507
2409	chr7:4590930-4600359	0.0939233	0	0.044625	0.0653462	0	0	0	0.031647	0	0	0	0	0	0.0842739	0	0	0	0.0505161	0	0	0	0	0.0437616	0	0	0	0	0.0340983	0	0.0483714	0.0470691	0	0	0.0497739	0	0	0	0.0460964	0	0.0300578	0.0621762	0	0.0473114	0	0	0.104961	0	0.071529
2837	chr8:60305358-60312325	0	0	0	0	0.0658605	0.0550338	0	0	0	0	0.0614053	0	0	0	0.0635992	0	0	0	0.0609969	0.0436616	0	0	0	0	0	0	0	0.0461462	0	0.0654625	0	0.0831836	0	0.0673605	0	0.0354849	0	0	0	0	0	0	0	0	0.0710595	0	0	0
924	chr3:38290491-38294225	0.118567	0	0	0	0	0	0	0.0799013	0	0	0	0	0	0	0	0	0	0	0	0.081455	0	0	0	0.0766312	0	0	0.257199	0	0	0.122126	0	0	0	0	0	0.132401	0	0	0	0	0	0	0	0.0714821	0	0	0	0
2356	chr6:141452940-141460677	0	0.0567963	0.0543828	0	0.0593068	0.099115	0.174373	0	0	0	0.055295	0	0	0	0	0	0	0	0	0	0	0.0589432	0.0533306	0.0369885	0	0	0	0	0	0.0589484	0	0.037453	0	0	0	0	0.0534508	0.0561759	0	0	0.0378859	0	0.0576566	0.0345032	0	0	0	0.0435848
1799	chr5:32672573-32678102	0	0	0	0.0557156	0	0	0	0	0	0	0	0.0454551	0	0	0.0801373	0	0	0.0861422	0	0.0550152	0	0	0	0	0	0.0824587	0	0	0.0770175	0.16497	0	0	0	0	0	0	0	0	0.0699928	0	0	0	0.0806775	0	0	0	0	0
5883	chr1:48437944-48446631	0	0	0	0.0709271	0	0	0	0	0	0	0.0492487	0.0867979	0	0	0	0.0284028	0	0	0	0.0350178	0	0	0.0949982	0	0	0.104972	0	0.0370104	0	0	0	0	0.0258808	0	0.124162	0.142299	0	0.0500333	0	0.0326249	0.0674864	0.0452444	0.051352	0.0614608	0	0	0	0
801	chr2:209078020-209084644	0	0.0663381	0	0	0.138541	0.115766	0	0.0900925	0	0	0	0	0	0.0599776	0.0668919	0	0	0.0719044	0.192465	0	0	0	0	0	0	0	0	0	0	0.0688517	0.0669979	0	0	0	0	0	0	0	0	0	0	0	0	0	0	0.224103	0.125702	0.0509071
3826	chr12:66281497-66290831	0	0.0470798	0.0901584	0.0660112	0	0	0.0481805	0.0639382	0	0	0	0	0	0.0425658	0.0949457	0.0264343	0	0.10206	0.0455304	0	0	0.0488594	0.088414	0.0306607	0	0	0	0.0344453	0	0	0	0	0.024087	0	0	0.0529746	0	0	0	0.0303637	0.0314045	0.0421086	0	0.0286005	0	0	0	0.0722569
6081	chr1:160716922-160725930	0	0.0487834	0	0	0	0	0.049924	0	0	0.0963167	0.0949878	0	0	0.0441061	0	0	0	0	0.047178	0	0	0.0506274	0.0458067	0.0317702	0	0	0	0	0	0.0506319	0	0.0321691	0	0	0.0798253	0.0548916	0.0918198	0	0	0.0314624	0.0325409	0	0	0	0	0	0	0.0374358
526	chr2:47100196-47108458	0.107188	0.0531877	0	0.0372876	0	0	0.0544312	0	0	0.0525062	0	0	0	0	0	0.0298637	0	0	0.0514373	0	0	0.110396	0	0	0	0	0	0.077828	0.0257719	0	0	0	0	0	0	0.0299236	0.0500547	0.0526067	0	0	0	0	0	0	0	0	0	0
4039	chr13:90839491-90844113	0.0957925	0.095066	0	0	0	0.0829496	0	0	0	0	0	0	0	0.085951	0.0958596	0	0	0.103043	0	0	0	0.0986594	0	0.123823	0	0	0	0	0	0	0	0	0	0	0	0	0	0	0	0	0	0.170056	0	0	0	0	0.090069	0
3176	chr9:135437307-135444509	0.0614811	0.0610148	0	0	0	0	0	0.0414316	0	0	0	0	0	0.0551647	0.0615242	0	0	0	0	0	0	0.0633212	0.0572917	0	0	0.0633065	0.133366	0.0446406	0	0.0633267	0	0	0	0	0.0499199	0	0	0	0	0	0	0	0.061939	0	0	0	0	0
567	chr2:71046742-71050606	0	0	0	0	0	0	0	0	0	0	0	0.0650367	0	0	0	0.0638458	0	0	0	0	0	0	0	0	0	0	0	0.166389	0	0	0	0	0	0	0	0	0.107012	0	0	0.0733364	0	0	0	0.0690778	0	0.128045	0.215466	0
941	chr3:46329668-46332857	0	0	0	0	0	0	0.140992	0	0	0	0	0	0	0	0	0.0773555	0	0	0	0	0	0	0	0	0	0	0.15057	0	0	0	0	0	0	0.147137	0	0.0775107	0	0	0	0	0.2757	0	0	0	0	0	0	0.105724
2940	chr8:115212253-115218202	0	0.0738639	0	0	0	0.128899	0	0	0	0.0729174	0	0	0	0.0667818	0	0	0	0	0	0.0511318	0	0	0	0	0	0	0	0	0	0	0.0745985	0.0487078	0	0	0	0	0	0	0	0.0476378	0.0492708	0	0.149965	0	0	0	0	0.113364
1493	chr4:87921803-87927332	0	0	0	0	0	0	0	0.0539659	0	0.156911	0.154746	0	0	0	0	0	0	0	0.0768583	0.0550152	0	0.0824778	0	0	0	0	0	0	0	0	0	0.0524072	0	0.0848766	0	0.0894246	0	0	0	0.0512559	0	0.071082	0	0.0482795	0	0	0	0
856	chr3:4127291-4137307	0	0.0877488	0	0	0	0	0	0	0	0.0866245	0.0427146	0	0	0	0.0884814	0	0	0.0951116	0.0424305	0.0303718	0	0.0455328	0	0.0285732	0	0	0.0479503	0.0642002	0	0.0455368	0	0.14466	0.0448941	0	0	0.0493679	0.04129	0	0	0	0	0	0	0.0266532	0	0	0	0.0673374
2312	chr6:119764798-119771994	0	0	0	0	0	0	0.0624934	0	0	0	0.0594515	0	0	0	0.0615755	0.034287	0	0.0661896	0	0	0	0.063374	0.0573395	0.039769	0	0	0.0667387	0.0446779	0	0	0	0	0	0	0.0499615	0	0	0	0.107562	0	0	0	0.0619906	0	0.0687984	0	0.0578559	0
2000	chr5:136565217-136571216	0	0.0732483	0.0701357	0	0	0	0	0.0497386	0	0	0	0	0	0	0	0.123382	0.0326524	0	0.0708378	0	0	0	0	0	0	0.0759994	0	0.0535911	0	0	0	0	0.0374754	0	0.0599289	0	0	0	0.0645101	0.0944817	0	0	0	0	0.0825237	0.0824822	0	0
4681	chr19:23571069-23580044	0	0.0489628	0	0.0343257	0.051127	0	0	0	0.0142067	0	0	0	0	0.0442682	0.0987431	0	0	0.106142	0	0.0338942	0	0	0.0459751	0	0	0	0.107023	0.0358229	0	0	0.0494498	0	0	0	0	0.0275467	0	0.0484279	0	0	0.0326605	0	0	0	0	0	0	0.11272
4099	chr14:31271807-31280829	0	0	0	0.0682937	0	0	0	0	0	0	0	0.0278584	0	0	0.0491144	0.0546966	0	0.0527947	0	0.0337176	0.0254911	0	0	0	0	0.0505371	0	0	0	0	0	0	0.0249199	0	0.0398507	0	0	0	0.0428971	0.0314136	0.0324904	0.0435646	0	0	0	0.054848	0	0
1814	chr5:37778276-37786017	0	0	0	0	0	0	0	0	0	0.0560396	0.110533	0.0324679	0	0.0513241	0	0.0318734	0	0	0.0548988	0.0392966	0	0	0	0.0369694	0	0.117798	0	0	0	0	0.0573316	0.0374337	0	0	0	0.0319374	0	0.0561469	0	0.0366114	0.0757326	0	0.115254	0.0689707	0	0	0	0.0435623
3177	chr9:136780314-136789786	0	0	0	0.0325248	0	0	0	0	0	0	0	0	0	0	0	0.0260492	0	0.0502867	0	0.0642319	0	0	0	0	0	0	0	0.0339435	0	0	0	0	0	0	0	0	0	0.0917744	0	0.0897641	0.030947	0.0414951	0.0470966	0.0281838	0.104538	0.0522425	0	0.0356022
2360	chr6:143077708-143086385	0	0.0506442	0	0.0710088	0	0	0.0518282	0	0.0146945	0	0	0	0	0.0457884	0.051067	0.0284356	0	0	0	0.0350581	0	0	0	0	0	0	0	0	0	0	0.0511479	0.0667923	0.0259106	0	0	0	0	0	0.0446025	0.065325	0	0	0	0	0	0	0.0479821	0
3680	chr12:4018996-4025863	0	0	0	0.0897225	0	0	0	0.0434525	0	0	0	0	0	0.115711	0	0.0359295	0	0.0693603	0	0.0442974	0	0	0	0	0	0	0	0.0936362	0	0	0	0.0421974	0	0.136682	0	0.0360016	0	0	0	0	0	0	0	0	0	0.144116	0	0
4587	chr18:74293058-74298748	0	0	0	0	0	0	0	0.0524392	0	0	0	0	0	0.069821	0	0.0433604	0	0	0	0	0	0.0801445	0	0	0	0.0801259	0	0.169503	0	0.160303	0	0	0	0.0824754	0	0	0	0	0	0	0	0	0	0.0469136	0	0	0	0.0592619
5096	chrY:12465499-12478126	0	0	0	0	0	0	0	0	0	0	0	0	0	0	0.0701867	0	0	0	0	0	0	0.180592	0.0653583	0.113326	0	0	0	0	0	0	0	0	0	0	0	0	0	0	0	0	0.0232152	0	0	0	0	0	0	0.106829
2344	chr6:134598240-134605136	0	0	0.122028	0	0	0	0	0	0	0	0.0620375	0	0	0	0.128508	0.0357784	0	0	0.0616248	0	0	0.0661306	0.0598336	0	0	0	0.0696417	0	0	0	0.193067	0.0840399	0	0.0680539	0	0	0	0.0630258	0	0	0	0.0569934	0	0	0	0	0.0603725	0
1248	chr3:177657044-177671140	0	0	0.0597027	0	0	0	0.0957151	0	0	0	0	0	0	0.028187	0.0628728	0.0175047	0	0	0	0.0215815	0	0.0970637	0.0292738	0	0	0.0646941	0	0	0	0.0647148	0	0.0616752	0	0.0665911	0	0	0.0293397	0	0.0274569	0	0.041592	0	0.0316483	0.0189392	0	0.0351063	0	0.0239242
1758	chr5:12663588-12668504	0.18013	0	0	0	0	0	0	0	0	0	0	0.051122	0	0	0	0	0	0	0	0	0	0	0	0	0	0	0	0.0653949	0	0.0927685	0	0	0	0	0.0731286	0	0	0.0884054	0.0787188	0	0.0596219	0	0.181471	0.0542985	0	0	0	0.137181
3526	chr11:67759689-67765370	0	0	0	0	0	0	0	0	0	0.0763567	0	0.0442391	0	0	0	0	0	0.167676	0	0	0	0	0.072628	0	0	0	0	0	0	0	0	0.0510052	0.0395727	0.0826061	0	0	0	0	0.0681204	0.0997695	0	0	0	0.046988	0	0	0	0
4630	chr19:17592763-17603116	0	0.0424464	0	0	0	0.074073	0	0	0.0985275	0	0	0.0242773	0.0451226	0	0	0.0476654	0	0	0.0410495	0	0	0	0	0	0	0	0	0.0310553	0	0.0881094	0	0	0	0.045332	0.034728	0.0477611	0	0.0419827	0.0373827	0	0	0	0.0430893	0	0	0	0.0402153	0
4652	chr19:21253166-21264283	0	0	0	0.0277125	0.0412768	0	0	0.0536844	0	0.0780462	0	0	0	0	0	0	0	0	0	0	0	0.0410238	0	0	0	0.0410143	0	0.0578425	0	0	0	0.0782007	0	0	0.0323415	0.0222395	0.111603	0	0.0696277	0.0764828	0.0263681	0	0.0401283	0.0480276	0	0	0	0
4895	chr21:37583711-37592312	0	0	0	0.0716362	0	0.0445798	0	0	0	0	0	0.0292219	0	0.0461929	0.0515181	0.0286868	0	0	0	0	0	0	0.047974	0.0665467	0	0	0	0	0	0	0	0	0	0.054565	0	0.0287444	0.0480821	0	0.0449966	0.131804	0.0681611	0	0.0518654	0.0310376	0	0	0.0484061	0
2750	chr8:24235765-24242893	0	0.0616482	0	0	0	0	0	0.0418616	0	0.0608583	0	0.0352597	0	0	0	0	0	0	0	0.0426756	0	0	0.0578864	0.0401483	0	0	0	0	0	0	0	0.081305	0	0	0	0	0	0	0.162881	0	0.0822446	0.0551386	0.0625819	0.0374506	0	0	0.116816	0
1908	chr5:96164810-96172177	0	0	0.0571138	0.0418169	0	0.0520461	0.061043	0	0	0.0588842	0	0.034116	0	0.107859	0	0	0	0	0.0576855	0.123874	0	0	0	0	0	0	0	0	0	0	0.0602417	0	0.12207	0	0	0	0	0.117994	0	0.0384697	0.0397884	0	0.0605519	0.0362358	0	0	0.0565132	0.0457735
2736	chr8:12459030-12468471	0.046902	0	0.0445683	0	0	0.0406138	0.0476345	0.0948204	0	0	0.0453159	0	0	0.0420834	0.0469349	0	0	0	0	0	0	0	0	0.0909396	0	0	0	0	0	0	0.0470092	0.0613878	0.023814	0.0497106	0	0	0	0.0460378	0	0.0600392	0.0310486	0	0.0472513	0.0282764	0	0	0	0.0357191
1855	chr5:59301790-59315633	0	0	0.0303969	0	0.0662981	0	0	0.0215567	0	0	0	0.0363142	0	0.0287021	0.0320109	0	0	0	0	0	0	0.0329459	0.0298087	0.0206745	0	0	0	0.0232264	0	0.0329487	0	0.0209341	0	0	0	0.0178604	0	0.0627982	0	0.0204742	0.021176	0	0.0644534	0.0771412	0	0	0	0
965	chr3:57304052-57310296	0	0	0	0	0	0.0614053	0	0	0	0.069473	0	0	0	0	0	0	0	0	0	0	0.0368304	0	0	0	0.0903648	0	0	0	0	0	0	0.046407	0	0	0	0	0	0	0.0619792	0.0453875	0.0938866	0.0629437	0	0.128256	0.0792862	0	0	0
4809	chr20:5304696-5307873	0	0	0	0	0	0	0	0	0	0	0	0	0	0.125032	0	0	0	0	0	0	0	0.143519	0	0	0	0	0	0	0	0.143531	0.139667	0	0	0	0	0	0	0	0	0	0	0.123689	0	0	0	0	0	0.106123
5493	chrX:75631567-75637470	0	0.0744394	0	0	0	0	0	0	0	0.0734855	0	0	0	0	0	0	0	0.0806854	0	0	0	0	0.0698971	0	0	0	0	0.0544625	0	0	0	0	0.0380847	0	0	0.0837599	0	0	0	0	0	0	0	0.0904423	0	0	0	0
3530	chr11:68622945-68634155	0.0790025	0	0	0.0274826	0	0.136821	0.0401182	0	0	0	0	0.0224214	0	0	0	0	0	0	0	0	0	0	0.0368096	0.02553	0	0.040674	0	0	0.018995	0.040687	0	0.0258506	0	0	0.128293	0	0	0	0	0	0	0.0350623	0	0	0	0.0882871	0	0
6264	chr22:18938816-18947848	0	0.0486538	0	0.0341091	0.101609	0.0424528	0	0	0	0	0	0	0	0	0.04906	0	0	0	0.0941053	0.0336803	0	0	0	0.0316858	0	0.0504812	0	0.0355969	0	0	0.0491377	0	0	0.0519614	0.0398066	0	0	0	0.0428496	0	0.0649089	0	0	0	0	0	0	0.0373364
4779	chr19:53831404-53845084	0	0.0321241	0.030759	0	0.100632	0	0	0	0	0.0317125	0.0312749	0	0	0.0580881	0.0647846	0	0	0	0	0.0222377	0	0.0333384	0	0.0209208	0	0	0	0	0	0	0.0648872	0	0	0	0	0	0	0	0.0282918	0	0.0214283	0	0.0326107	0.0195151	0	0.0361738	0	0.0246517
4098	chr14:31240557-31251389	0.0408796	0.0405696	0	0.0568831	0	0	0	0	0	0	0	0.0232038	0	0.110039	0.0409083	0	0	0	0	0	0	0	0	0	0	0.0420933	0.0443385	0	0.0589735	0	0	0	0	0.0433276	0	0.0912985	0	0	0.0357298	0.026165	0	0	0	0.0246456	0.0457068	0.0456839	0.0384371	0.0311326
2869	chr8:80739764-80744514	0.0932117	0.0925047	0.0885738	0.064851	0	0	0	0	0	0	0	0	0	0	0	0	0.0412364	0	0	0	0	0	0	0.0602436	0.0791873	0.0959791	0	0	0.134469	0	0	0.0610001	0.141982	0	0	0	0	0	0.0814692	0	0	0	0	0	0.104219	0	0	0
1921	chr5:100982837-100990224	0	0	0	0.0417037	0	0.0519052	0	0.0403941	0	0.0587248	0	0	0	0.0537834	0.179951	0	0	0	0	0.0411795	0.0311324	0	0.0558571	0.0774817	0	0.0617213	0	0.0435228	0	0	0	0.0392273	0	0.127062	0	0	0	0	0	0	0	0	0	0	0	0	0	0
2021	chr5:154635980-154644486	0	0	0	0	0	0.0450777	0.15861	0	0	0	0.0502965	0.0590964	0	0	0.0520935	0.0290072	0	0.055997	0	0.0357628	0	0.053615	0	0	0	0	0	0.0377979	0	0	0	0	0	0	0	0.0290654	0	0	0	0	0	0	0	0.0313842	0	0	0.0978933	0.0396449
815	chr2:218113478-218114746	0.348974	0	0	0	0	0	0	0	0	0	0	0	0	0	0	0.194455	0	0	0	0	0	0	0	0.225546	0	0	0	0	0	0	0	0	0	0	0	0	0	0	0	0	0	0	0	0	0	0	0	0
787	chr2:197578433-197587686	0	0	0.0909475	0.066589	0	0	0.145807	0.0322489	0	0	0.0462365	0.0543261	0	0	0.0478884	0.0266656	0	0	0	0	0	0.0492871	0	0	0	0	0	0	0	0.0492914	0	0	0	0	0	0.0267192	0	0	0.0836526	0.0306295	0.0316794	0.0849543	0	0.0577017	0	0.0534789	0	0
3226	chr10:37937012-37944189	0	0	0.0586256	0.0429238	0	0.0534238	0	0	0	0	0	0.035019	0	0.110714	0	0.0343778	0	0.0663648	0	0	0	0	0	0	0	0	0.0669154	0	0	0	0.0618363	0	0	0.0653898	0.200375	0.0344468	0	0	0	0	0.122525	0.0547622	0	0	0	0	0	0.0469851
6144	chr1:193375077-193383555	0	0	0.0992603	0.0363377	0	0.0452265	0	0	0	0	0	0	0	0	0.156796	0.0291029	0	0	0	0	0	0	0	0	0	0.0537795	0	0	0	0	0	0	0	0	0.0424075	0	0	0	0	0.0668581	0	0.0463596	0.263089	0	0	0	0.0982165	0
5447	chrX:65927365-65932801	0	0.0808332	0	0	0	0.0705308	0	0	0	0	0	0	0	0	0.081508	0	0	0	0	0	0	0	0.0759007	0.0526425	0	0	0.0883426	0	0	0.083896	0	0	0	0	0.0661345	0	0.152144	0	0	0.0521326	0	0	0	0	0	0	0.0765843	0
1535	chr4:100992906-100997352	0	0	0	0	0	0	0	0	0	0	0.096216	0	0	0.0893527	0	0	0	0.107121	0	0.0684134	0	0	0	0	0	0	0	0	0	0.102573	0	0.13034	0	0	0	0	0	0	0.0870385	0.0637385	0	0	0	0	0.111343	0.111287	0	0
4559	chr18:51112856-51117176	0	0	0	0	0	0	0	0	0	0.100407	0.198043	0	0	0	0	0	0	0	0	0.0704083	0	0	0.0955039	0	0	0	0	0	0	0	0.102722	0	0	0.108625	0	0	0	0	0.0895766	0.0655971	0	0	0	0.0617879	0	0	0	0
872	chr3:16015596-16024185	0	0.051163	0.0489888	0.0358681	0	0	0	0.0347417	0	0	0	0.0292627	0	0	0	0	0	0.0554559	0	0	0	0	0.048041	0	0	0	0.055916	0	0	0	0.0516718	0	0	0	0	0.0575691	0	0.101208	0.0450594	0	0.0682563	0	0.0519379	0.031081	0	0	0.0484737	0
789	chr2:199246975-199255234	0	0.053207	0.101892	0.0373011	0.0555588	0	0	0	0	0	0.0518005	0	0	0	0	0	0	0.0576715	0.102912	0	0	0	0.0499603	0.034651	0	0.110411	0.05815	0	0	0	0.0537362	0.0350862	0	0.170473	0.0435319	0	0	0	0	0	0	0	0	0	0.0599446	0	0	0
5098	chrY:12593587-12599119	0	0	0	0	0	0	0	0	0	0	0	0	0	0	0	0	0	0	0	0	0	0.0824331	0	0	0	0.082414	0	0.0581143	0	0	0	0	0	0	0	0	0	0	0	0	0	0	0	0	0	0	0	0
4645	chr19:20518221-20524319	0	0	0	0	0	0.0628752	0	0	0	0	0	0	0	0	0	0	0	0	0.0696879	0	0	0	0.0676623	0	0	0	0	0	0	0.0747897	0	0	0	0	0.117912	0	0	0	0	0.046474	0	0	0.219452	0.0437753	0	0	0.0682717	0
1561	chr4:109855977-109860952	0	0	0.0845688	0	0.0922258	0	0	0.0599742	0	0	0	0.0505158	0	0	0	0	0	0	0	0	0	0	0	0	0	0	0	0	0	0	0	0	0	0	0	0	0	0	0	0	0	0	0	0.0536547	0	0	0	0
886	chr3:20616328-20619030	0	0	0	0	0	0	0	0.110408	0	0	0	0.0929954	0	0	0	0	0	0	0	0	0	0	0	0	0	0	0	0	0	0	0	0	0	0	0	0	0	0	0	0.104863	0.108458	0	0	0.0987738	0	0	0	0
4300	chr15:82702480-82708397	0	0	0.0711075	0	0	0.129596	0	0	0	0.0733117	0	0	0	0	0	0	0	0	0	0	0	0	0	0	0.031786	0	0	0	0	0	0.0750019	0	0	0	0	0	0.0698888	0	0.0654039	0	0	0	0	0	0	0.0836251	0	0
5903	chr1:62178464-62183792	0.0831016	0	0	0	0	0	0	0	0	0	0.160583	0	0	0.074564	0.0831599	0	0	0	0	0	0	0	0	0	0	0	0	0	0	0.171193	0	0	0.0421941	0	0	0	0	0.0815705	0.145266	0	0	0	0	0	0	0	0	0.0632875
4069	chr14:20705115-20716020	0	0.040298	0	0.0282512	0	0.0351619	0	0.054728	0	0.0397816	0	0	0	0	0	0	0	0	0.0389718	0.0557921	0.0210899	0	0	0.0524881	0	0.0418115	0	0.0294835	0.117158	0	0	0.0265736	0.0206173	0.0430376	0.0329702	0.0226718	0.0379243	0	0	0	0.0806421	0	0	0.0244806	0.0908018	0.0453781	0	0
6238	chr1:242212993-242217888	0	0	0	0	0	0	0	0.0609542	0.0520912	0	0.174784	0	0	0.0811584	0	0	0	0	0	0	0	0	0.168575	0.116919	0	0	0	0	0.0434954	0	0	0	0	0	0	0	0	0	0	0	0.119755	0	0	0	0	0	0.0850468	0
1537	chr4:101669091-101678357	0	0.0474253	0	0	0	0.0413808	0	0	0	0.0468176	0	0	0	0	0	0.0266282	0	0	0	0	0	0	0.0445314	0.0308857	0	0	0	0	0	0	0.047897	0	0	0	0	0.0266817	0	0	0	0	0	0	0.0962871	0	0.160292	0.213615	0	0
817	chr2:218169170-218179890	0	0.163973	0	0.0574773	0	0	0	0	0	0	0	0.0234462	0	0.0370629	0.0413356	0	0	0.088866	0	0.0283774	0.0214538	0	0.038492	0	0	0	0	0.0299922	0	0	0.0414011	0.0270321	0	0	0.0335392	0.0230631	0	0	0.036103	0	0.0273446	0	0.0832285	0.024903	0	0	0	0
5122	chrY:14588806-14597503	0	0	0.0483806	0	0	0	0	0	0	0	0.049192	0.0288994	0	0	0	0.0283702	0	0	0	0	0	0.104875	0	0.0329061	0	0	0.110443	0.0369679	0	0	0	0	0.0517021	0	0	0	0	0	0	0.0325874	0	0	0	0	0.056926	0	0.0478718	0.0387744
2441	chr7:23073208-23086251	0	0.0336929	0	0.0236206	0	0.0587973	0	0.0457577	0	0.0997835	0	0.0192707	0	0	0	0.0378356	0	0	0	0.0233237	0.0176331	0	0.0316369	0	0	0	0	0.0493018	0	0	0	0.044436	0	0	0	0	0	0.0666497	0.0296734	0.0217299	0.0224748	0.0301352	0	0.0204681	0	0.0758806	0	0.051711
4683	chr19:23847289-23857146	0.0898455	0.0445821	0	0.0312545	0	0.0777999	0	0	0	0	0.130211	0.0254987	0	0	0.0449543	0	0	0	0	0.0308617	0	0	0	0	0	0.0462565	0	0.0326178	0	0.0925426	0	0	0	0	0	0.0250821	0	0.0440951	0	0.0287528	0.0297384	0	0.0452573	0.0270831	0	0	0.0422387	0.0684235
2413	chr7:6840768-6845943	0	0	0.081301	0	0	0	0	0	0	0	0	0	0	0.0767681	0	0	0	0	0.0821149	0	0	0	0	0	0	0	0	0	0	0	0	0	0	0.0906815	0	0	0.0799077	0	0.0747798	0	0.0566385	0	0.0861952	0	0	0.0956131	0	0.130317
6230	chr1:237916849-237921655	0	0	0	0	0	0	0	0.0620827	0	0	0	0.0522918	0	0	0	0	0	0	0	0	0	0	0	0	0	0	0	0	0	0	0	0	0.046776	0.0976425	0	0.0514373	0	0.0904284	0	0.11793	0	0	0.185624	0	0	0	0	0.07016
600	chr2:84467988-84476707	0	0.0504002	0.144776	0	0	0	0.0515786	0	0	0.0497544	0.147204	0	0	0	0	0.0282986	0	0	0.0487416	0	0	0	0	0	0	0	0.0550824	0.0737492	0	0	0.0509015	0	0	0	0	0.0283554	0	0	0	0	0	0.0450784	0	0.0306176	0	0.0567538	0.047751	0.0773531
2366	chr6:145104064-145108661	0	0	0	0.067009	0	0.166801	0	0	0	0	0	0	0	0	0	0	0	0	0	0	0	0	0.0897504	0.124496	0	0	0	0	0	0.0992045	0.0965335	0	0	0.102081	0	0	0	0	0	0	0.0637584	0	0.0970306	0.0580656	0	0.107632	0	0
5654	chrX:114602201-114606789	0	0	0	0	0	0.167128	0	0	0	0	0	0	0	0	0.0965699	0	0	0	0	0	0	0	0	0	0	0	0	0	0	0.0993991	0	0	0	0	0	0	0	0	0.0843453	0.0617662	0	0	0.0972209	0	0	0	0	0
5632	chrX:107871428-107879722	0	0	0	0.0371437	0	0	0.0542212	0	0	0.0523036	0.051582	0.0303034	0	0	0.0534248	0	0	0	0	0.0366768	0	0	0	0	0	0.109945	0	0	0	0	0	0.0349381	0	0	0	0.0298082	0	0.104808	0.0933238	0	0.0353419	0	0	0	0.0596917	0	0	0
1280	chr3:196520031-196525494	0	0.0804337	0	0	0	0	0.0823142	0	0	0	0	0	0	0	0	0.0451618	0.0358555	0	0	0	0	0	0	0	0	0	0.087906	0	0	0	0	0	0	0	0	0	0.0756958	0.15911	0	0	0	0	0	0.0977253	0.090619	0.0905735	0.0762059	0
3087	chr9:82883729-82891699	0	0.165408	0	0	0	0.0962177	0	0	0	0	0.0536786	0.0315351	0	0.0996993	0	0	0	0	0	0	0	0	0.0517717	0	0	0	0	0	0.106864	0	0	0.0363583	0	0	0.0451102	0	0	0	0	0	0	0.0493142	0	0	0.062118	0	0	0.0423108
5966	chr1:91662451-91672448	0	0.0439578	0.0420898	0	0	0	0.0449855	0.0298491	0	0	0	0	0	0.0794862	0	0	0	0	0.0425112	0.0304295	0	0	0	0.11451	0	0	0.0480415	0	0	0	0.044395	0.028987	0	0	0	0.0494617	0	0.0434776	0	0	0.029322	0.0393162	0.0892471	0.0267039	0	0	0	0.0337327
2639	chr7:135320871-135324799	0	0	0.107105	0	0	0.0976014	0	0	0	0	0	0.0639773	0	0	0	0	0	0	0	0	0.0585406	0.116086	0	0	0	0	0	0	0	0	0	0	0.0572289	0	0	0	0	0	0	0	0	0	0	0.0679525	0	0.125959	0	0.0858385
788	chr2:199179579-199186022	0	0	0	0	0	0	0	0	0	0.134655	0	0	0	0.0616622	0	0	0	0	0	0	0	0	0	0.0444161	0	0	0	0.0498986	0	0	0.0688798	0.0449739	0	0	0	0.0383704	0.128368	0.134913	0.12013	0.0439859	0	0	0.0692344	0.0414316	0	0	0	0.0523369
2358	chr6:142015649-142022089	0	0	0.0653337	0	0	0.0595367	0.0698284	0.0926662	0	0	0	0	0	0	0	0	0	0	0	0	0	0	0	0	0	0	0	0.0499218	0	0.0708186	0	0.0899896	0	0	0	0	0	0	0.0600932	0	0.0910296	0	0.0692667	0.0829019	0	0	0	0
2972	chr8:137824631-137830449	0	0	0	0	0	0	0	0	0	0.074559	0	0	0	0	0	0	0	0	0.0730412	0	0	0.0783816	0	0	0	0.156727	0	0	0	0.156777	0	0	0	0	0	0	0	0	0	0	0	0	0	0	0.0850906	0	0.0715568	0
3567	chr11:83428600-83436577	0.0555087	0.110175	0	0	0	0.0480667	0	0	0	0	0.0536315	0	0	0	0	0	0	0	0	0.0762683	0	0	0.0517263	0	0	0	0	0.0403042	0	0	0.0556356	0.0363263	0	0	0	0.0309926	0	0.054486	0	0	0	0	0	0	0.0620635	0.0620323	0	0
5465	chrX:71696822-71703196	0	0	0.0660101	0	0	0	0.0705514	0.0468128	0	0.136113	0	0.0394301	0	0	0	0	0	0	0.0666708	0	0	0	0	0	0	0	0	0.0504387	0	0	0	0	0	0.0736263	0	0	0.0648788	0	0	0	0.045986	0.12332	0	0	0.0776694	0	0	0
2054	chr5:179047878-179056363	0	0	0	0	0.0540792	0	0.0530008	0	0	0.0511264	0	0	0	0.0468244	0	0.0581579	0	0	0	0	0	0	0	0	0	0	0	0	0	0.0537524	0	0.0683035	0	0.0553108	0	0	0	0	0.0456116	0	0	0.0463214	0.0525744	0	0	0	0	0
2741	chr8:12688390-12691931	0	0.12408	0	0	0	0	0	0	0	0	0	0	0	0	0.125115	0	0	0	0	0	0	0	0	0	0	0	0	0	0	0	0	0	0	0	0	0	0	0.122724	0.109277	0	0.248301	0	0	0	0	0	0	0
4306	chr15:87829824-87840842	0.0401895	0.0398847	0	0.0279614	0	0.0348013	0.0816345	0	0	0	0	0	0	0	0.0402177	0	0	0.0432314	0.0385722	0	0	0	0	0	0	0	0.0871801	0	0	0.082792	0	0	0	0.170385	0.0652642	0	0.0375354	0	0.0351266	0	0	0	0	0	0	0	0	0.0306071
5103	chrY:12953369-12964165	0	0	0	0	0	0	0	0	0	0	0	0	0	0.036802	0	0.0457097	0	0	0	0	0	0	0.076442	0	0	0.0422336	0	0.0595622	0	0	0	0	0	0	0	0	0	0	0	0	0	0	0	0	0	0	0	0.0937092
1014	chr3:87927737-87943931	0	0.0814122	0.0259842	0.0190248	0	0	0	0	0	0	0.02642	0	0	0	0	0.015237	0	0	0	0.0187857	0	0.0281632	0.0764444	0.0176732	0	0	0	0.0198547	0.0525973	0	0.0274073	0	0.0138841	0	0	0	0	0	0.0239	0	0.0181019	0	0.0275484	0.0164857	0	0.0305584	0.0514219	0.0416498
2434	chr7:20120709-20126557	0.0757136	0	0	0	0	0	0.153792	0	0	0.0741766	0.0731531	0	0	0	0	0	0	0	0	0	0.117972	0	0	0.0489344	0	0	0	0	0	0	0	0	0	0.160495	0	0.0422737	0	0.0743186	0	0	0	0	0	0.0456464	0.0846542	0	0	0
1646	chr4:145698823-145704802	0	0	0	0	0	0	0	0.0499049	0	0	0	0	0	0	0	0	0	0.15932	0	0.0508753	0	0	0	0	0	0	0.160642	0	0	0.076278	0	0.096927	0	0	0	0	0	0.0726905	0	0.0473988	0	0	0	0	0	0	0	0
3574	chr11:85606311-85614001	0.0575801	0.0571434	0	0	0	0	0	0	0	0	0.0556329	0.0326832	0	0.0516645	0	0	0	0	0	0	0	0.0593034	0	0.0372146	0	0	0	0	0	0	0.115424	0	0	0.0610282	0	0	0	0	0.0503264	0	0.0381174	0	0	0.104142	0	0	0	0.0438512
2664	chr7:144418957-144423209	0	0	0	0	0	0	0	0	0	0	0	0	0	0	0	0	0	0	0	0.071534	0	0.321728	0	0	0	0	0	0	0	0	0	0	0	0	0	0	0	0.102208	0	0.0666459	0	0	0	0	0	0	0.0979048	0
2710	chr8:7706518-7713055	0.0677346	0	0.0643644	0.0471256	0	0	0	0	0	0	0	0	0	0	0	0.075486	0	0	0	0	0	0	0	0.0437775	0	0.0697456	0	0	0	0	0	0	0	0	0	0	0.0632613	0	0	0.0433535	0	0.0601229	0	0.040836	0	0	0	0
1528	chr4:99171452-99190269	0.0235332	0.0467095	0.0447246	0.016373	0.0243871	0.0203781	0	0	0	0.0230555	0	0	0	0.0211155	0.0235497	0.0131132	0	0.0253144	0	0	0	0	0.0438593	0.0152098	0	0.0242319	0	0.0512615	0	0	0.0235871	0.0154008	0	0	0	0	0.0439581	0	0	0	0.0155788	0.0208887	0	0.0141878	0.0263122	0	0	0
1966	chr5:122475952-122479132	0	0	0	0	0.144268	0	0	0	0	0	0.134509	0	0	0	0.139314	0.0775743	0	0	0	0	0	0	0.12973	0	0	0	0	0	0	0	0	0.0911071	0	0	0.113038	0	0	0	0	0	0	0	0	0	0	0	0	0
4057	chr13:109265090-109271115	0.0734896	0	0	0	0	0	0	0	0	0	0	0	0	0	0	0.0409499	0	0.0790518	0.0705321	0	0	0	0	0	0	0	0	0	0	0	0	0	0	0	0	0	0	0	0	0.047037	0	0	0	0.132917	0.0821677	0.0821263	0	0
1822	chr5:41993612-41999954	0	0	0	0	0	0	0	0	0	0	0.0674558	0	0	0	0.0698659	0.0389033	0	0	0.0670072	0	0	0.143813	0	0.0451233	0	0	0	0	0	0	0	0	0	0	0	0	0.0652061	0.0685305	0	0	0	0	0.0703368	0	0	0	0	0.0531703
1539	chr4:102235267-102245925	0	0.0824636	0	0	0	0	0.0421958	0	0	0	0	0	0	0	0	0	0	0	0.0398749	0	0	0	0	0	0	0.0855609	0	0.0301667	0	0	0.0416419	0.0543788	0	0.0880697	0	0	0.0388031	0	0.036313	0.0265921	0	0	0.0418563	0	0	0.0464296	0	0.0316408
1266	chr3:187463747-187472000	0.0536526	0.106491	0.0509831	0	0.0555992	0.0464594	0.0544906	0	0	0	0	0	0	0	0	0	0	0	0.0514934	0	0	0	0	0	0	0	0	0	0	0	0.0537753	0	0	0	0.0435635	0.0299563	0.0501093	0	0.0468937	0	0	0.0476234	0	0	0	0	0.0504469	0
2416	chr7:6871227-6875725	0	0	0	0.0684835	0	0	0	0.0663329	0	0	0	0	0	0	0.0985017	0	0	0	0	0.0676227	0	0	0	0	0	0	0	0	0	0	0	0	0	0	0.0799229	0	0	0	0	0	0	0	0	0.0593433	0	0	0.0925514	0
2118	chr6:32471841-32481344	0	0	0	0	0	0	0	0	0	0	0	0	0	0	0	0.0778926	0	0.0501227	0.0447208	0	0	0.0479906	0	0	0	0.0479794	0.101077	0.0676655	0	0	0	0	0	0	0	0	0.0435187	0	0	0	0	0	0	0	0	0.0520721	0	0
830	chr2:224223927-224230340	0.0690441	0.137041	0	0	0	0	0	0	0	0.0676424	0	0	0	0	0.27637	0	0	0	0	0	0	0	0	0.0892477	0	0	0	0.100264	0	0.0711167	0	0	0	0	0	0	0	0	0	0	0	0	0	0	0	0	0	0
6223	chr1:232118115-232125541	0	0.0591746	0	0	0.0617902	0.0516327	0	0.040182	0	0.0584164	0	0	0	0.107002	0	0	0	0	0.114454	0	0	0	0	0.0770748	0	0	0	0	0	0	0	0.0390214	0	0	0	0	0	0	0	0	0	0	0	0.035948	0	0	0.0560642	0
5186	chrY:19657574-19668204	0	0	0	0	0	0	0	0	0	0	0	0	0.0659203	0	0.0416856	0.0464235	0	0	0	0	0	0.0429031	0	0	0	0.0428931	0.0903619	0.120985	0	0	0	0	0	0	0	0	0	0	0	0	0	0	0	0	0	0	0	0.0951724
1595	chr4:128260328-128267686	0	0	0	0.0418681	0	0.0521098	0	0	0	0	0	0	0	0	0	0.0335323	0	0	0	0	0	0	0	0	0	0	0	0.0436943	0	0	0.0603154	0	0	0	0	0	0	0	0	0.0385168	0	0.106831	0.060626	0.0725603	0.0672839	0	0.113165	0
4599	chr19:7791837-7801535	0	0	0.0433874	0	0	0	0	0	0	0	0.0441151	0	0.0120425	0.0409683	0.0913824	0	0	0.09823	0	0	0.0711432	0	0	0	0	0	0	0.0331525	0.0658687	0.0470298	0.0457636	0	0.023183	0.0483934	0	0	0.0426438	0.0448179	0.0399072	0	0	0.0405282	0	0	0	0	0.0429311	0
566	chr2:70620648-70625536	0	0	0	0	0	0	0	0	0	0	0	0	0	0	0	0.100947	0	0	0	0.0622283	0	0	0	0	0	0	0	0	0	0	0	0	0	0	0	0.0505746	0	0	0	0	0.0599634	0	0.0912552	0.0546094	0	0	0	0
1961	chr5:119424565-119430783	0	0.0706689	0.0676659	0	0	0	0	0	0	0	0	0	0	0	0	0.039679	0	0.0765985	0	0.0489201	0.0369844	0	0	0.0460231	0.181485	0	0	0	0	0.0733466	0	0	0	0	0	0	0	0	0	0	0.0471396	0.0632068	0	0	0	0	0	0
1806	chr5:34783712-34786931	0	0.409463	0	0	0	0	0	0	0	0	0	0.156128	0	0	0	0	0	0	0	0	0	0	0	0.0888874	0	0	0	0	0	0	0	0	0	0	0	0	0	0	0	0	0	0	0.138555	0	0	0	0	0.104739
3950	chr13:41419198-41426048	0	0.0641498	0.0614238	0.0449726	0	0	0	0	0	0	0	0	0	0	0	0.108056	0	0	0	0.0444073	0	0	0	0.0417775	0	0	0	0.0469343	0	0	0	0.0423021	0	0	0	0	0	0	0	0	0	0.0573761	0.0651214	0	0.072273	0	0	0.0492277
4177	chr14:70436467-70443159	0	0.0656641	0	0	0	0.11459	0.0671993	0	0	0	0.0639283	0.0751133	0	0.0593682	0	0	0	0	0	0	0	0	0	0	0	0	0	0	0	0.0681522	0	0	0.0335951	0	0.107448	0	0	0.0649468	0.0578306	0	0	0.0587305	0	0	0	0	0	0.0503899
5897	chr1:55728817-55738118	0.0476079	0	0	0.132491	0	0	0	0	0.0137088	0.0466414	0.0459979	0	0	0	0	0.026528	0	0	0.045692	0	0.0989061	0.0980655	0	0.0307694	0	0	0	0	0.0228933	0.049037	0	0.0311558	0	0	0	0	0	0	0	0	0	0	0	0	0	0	0	0
1234	chr3:171576672-171582177	0	0	0.0764283	0	0	0	0	0	0	0.0787974	0	0.0456532	0	0	0.0804866	0	0	0	0.154387	0	0	0	0.0749496	0	0	0	0	0	0	0.165689	0	0	0	0.0852466	0	0	0	0	0.0702979	0	0	0	0	0	0	0	0	0
738	chr2:165707805-165716159	0	0	0	0	0.0549271	0	0.0538318	0.0357189	0	0	0	0.0300858	0	0	0	0	0.0234488	0.0570157	0.0508709	0	0	0.109181	0	0.068514	0	0.0545777	0	0.0384855	0	0	0.0531252	0.0346872	0	0	0	0	0	0	0	0	0	0	0	0.0639104	0	0.0592332	0	0.0403662
4310	chr15:89463857-89470416	0	0	0	0	0	0.0584567	0	0	0	0	0	0.0766362	0	0	0	0	0.029865	0.0726168	0	0.0463772	0	0	0.0629074	0.0436307	0	0.0695117	0	0	0	0	0	0	0	0	0.054813	0	0	0	0	0.0432081	0	0.0599212	0	0	0	0	0.0634739	0.0514115
4257	chr15:41131606-41137201	0.0791366	0	0	0	0	0	0	0	0	0	0.0764604	0	0	0	0	0	0	0	0.0759519	0	0.123306	0	0	0	0.100845	0	0.0858325	0	0	0	0	0	0	0	0	0	0	0	0	0.0506514	0.0523876	0	0	0	0	0	0	0
6092	chr1:167863091-167869903	0.0650005	0.0645076	0	0.0452234	0	0	0	0	0	0	0.0628024	0	0	0	0	0.0362196	0.028756	0	0.0623846	0.044655	0	0	0	0	0	0	0.0705003	0	0	0	0	0	0	0	0	0	0	0	0	0.0416036	0	0	0.130969	0	0	0	0	0.0495023
6086	chr1:161480757-161486360	0	0.156849	0	0	0	0	0	0	0	0	0	0	0	0	0.0790791	0	0	0	0	0	0	0.0813887	0	0	0	0	0.08571	0	0	0	0	0	0	0	0	0	0.0738048	0	0	0	0	0	0	0.047642	0	0.176621	0	0
768	chr2:187510609-187516863	0	0	0	0.0492577	0.0733678	0.0613071	0.0719049	0	0	0.0693619	0	0	0	0	0	0.0394507	0	0	0	0	0	0	0.0659748	0	0	0	0.0767896	0.0514063	0	0	0	0	0	0	0	0	0	0	0	0	0	0	0	0.0853671	0	0	0.066569	0
3832	chr12:70085290-70091969	0	0.0657919	0	0	0	0.0574066	0.13466	0	0	0.0649489	0	0	0	0.0594838	0	0	0	0	0	0.0455441	0	0	0	0	0	0	0	0	0	0	0	0	0	0	0	0.0370148	0	0	0	0.0848638	0	0	0	0	0.0741231	0	0	0
5874	chr1:45753522-45762513	0	0	0	0.0342646	0	0	0	0	0	0	0	0	0	0	0	0.0548852	0	0	0	0.0338339	0	0	0.0458933	0.0318302	0.0418393	0	0.106832	0.107278	0	0	0.0493618	0	0.0750174	0	0	0	0	0	0	0	0.0326024	0	0.0496159	0	0	0.0550371	0.0463066	0
1265	chr3:187174196-187181059	0	0	0	0	0	0	0.0655252	0	0	0	0	0.036621	0.0170163	0	0	0	0	0	0	0	0	0	0	0	0	0	0	0	0	0.132909	0	0.042222	0	0	0.157156	0	0	0	0.0563899	0.0412944	0	0.114535	0.129996	0	0	0	0	0
1500	chr4:91175554-91187307	0	0	0.0358018	0.026213	0	0	0	0	0	0	0	0.0427713	0	0	0.0377028	0	0	0	0.0361602	0	0	0.038804	0	0	0	0	0	0.0547127	0	0	0	0.0493128	0	0.0399326	0.0611831	0.0210362	0.0703764	0	0.0329301	0	0	0	0	0	0.0842509	0	0.0354253	0.0286932
3797	chr12:52112035-52118408	0	0	0	0	0	0.180488	0.0705624	0	0	0	0	0	0	0	0	0.0774283	0	0	0.0666813	0.0477305	0	0	0.0647431	0	0	0.0715401	0	0.0504466	0	0	0	0.0454678	0	0	0	0.0387918	0	0.0681972	0	0	0.0459932	0	0	0	0	0	0	0.0529117
983	chr3:75360056-75365719	0	0	0.0742963	0.0543975	0	0	0	0	0	0	0	0	0	0.0701539	0	0	0	0	0	0	0	0.0805266	0	0	0	0	0	0	0	0	0	0	0	0	0	0.0436545	0	0.076746	0	0	0	0	0	0.0942746	0.0874192	0	0.073515	0.0595444
5549	chrX:84738500-84745112	0	0.0664585	0	0.0931823	0	0	0	0	0	0	0	0	0	0	0	0	0	0	0	0.138016	0	0	0	0.043281	0	0	0	0	0	0	0	0	0	0	0	0.0373899	0	0.0657325	0	0	0	0	0	0	0	0	0	0
3792	chr12:50491882-50498717	0	0.0642905	0	0	0	0	0.131587	0	0	0	0.125182	0	0	0	0	0.0360977	0	0	0.0621747	0	0.0336463	0	0	0	0	0	0	0	0	0	0	0	0	0	0.0526	0	0	0	0.0566209	0.0414636	0	0	0	0	0.0724316	0	0	0
737	chr2:164459140-164463944	0	0.0914651	0	0.0641222	0	0	0.0936035	0	0	0.0902932	0	0	0	0	0	0	0	0	0	0	0	0.0949225	0	0	0	0.0949004	0	0	0	0.0949308	0	0	0	0	0.0748331	0	0	0	0	0	0.0610116	0	0	0.0555641	0	0	0	0
643	chr2:105991646-105995245	0	0	0	0	0	0	0	0	0	0	0	0	0	0	0	0	0	0	0	0	0	0	0	0	0	0	0	0	0	0	0	0	0	0	0	0	0.114889	0	0	0	0	0	0	0.0741627	0	0	0	0
2100	chr6:27178264-27186526	0.0535942	0.0531877	0	0.0372876	0	0.0464088	0	0.0361166	0	0.105012	0	0	0	0	0.107263	0	0	0	0	0	0	0	0	0	0	0.0551854	0.0581288	0	0	0	0.107433	0	0	0	0	0	0	0	0	0	0	0.0475715	0.0539933	0	0	0	0	0.0408156
4825	chr20:19752022-19756780	0	0.0923492	0	0	0	0	0	0	0	0.0911659	0	0	0	0	0	0	0	0	0	0	0	0	0.0867141	0	0	0	0	0	0	0	0	0.0608976	0	0	0.0755565	0.0519561	0	0.182681	0.0813323	0.0595598	0	0	0	0	0	0	0	0.0708677
1497	chr4:90446530-90455373	0	0.0496936	0	0	0	0	0.0508554	0	0	0	0	0	0	0.0449289	0	0.0279018	0.177218	0.0538632	0	0.0688002	0	0	0	0.0323629	0	0	0.0543101	0.0363576	0	0	0	0	0	0	0	0	0	0	0.0437653	0	0	0	0	0.0301883	0.0559862	0	0	0
3156	chr9:121789977-121796727	0	0.1302	0	0	0	0	0	0	0	0	0.0633791	0	0	0	0	0	0	0	0	0	0	0	0	0	0	0.13509	0	0	0	0	0	0	0	0	0	0	0.122531	0	0.114668	0	0	0.0582259	0.066086	0	0	0.0733067	0	0.0499569
6109	chr1:173683960-173692052	0	0	0	0	0	0.0473836	0	0	0.0157567	0	0	0	0	0	0	0	0	0	0	0.0375923	0	0	0	0.035366	0	0	0	0.0397314	0	0.0563626	0	0	0	0.0579968	0.0444302	0.0305522	0	0	0	0	0.072448	0.0971416	0	0	0.0611816	0	0	0
4608	chr19:9587772-9597068	0	0	0	0	0	0.0824945	0	0	0	0.0466665	0	0	0	0	0.0953338	0	0	0	0	0	0	0.0490591	0	0	0	0.0490477	0	0	0	0.0490634	0	0.0311726	0	0.100972	0	0.0265956	0.0444877	0	0	0	0	0.0422807	0	0.0287174	0	0	0	0
6124	chr1:183700889-183709310	0	0.0521836	0	0	0	0	0.106807	0.0354348	0.0302824	0	0	0	0	0.0471802	0.0526192	0	0	0	0	0	0	0	0	0	0	0	0	0.0381794	0	0.0541608	0	0	0	0.0557311	0	0.0587174	0	0.0516135	0	0.0673106	0	0.0466734	0	0	0	0	0.0494406	0.040045
2386	chr6:158880395-158889163	0	0.100237	0.0479888	0	0.0523339	0	0	0	0	0	0	0	0	0	0	0.056281	0	0	0	0	0	0	0	0.0652794	0	0	0	0	0.0971392	0	0	0.0330496	0	0.0535258	0	0	0	0	0.0882793	0.0323235	0	0	0	0	0	0	0.0474842	0
5194	chrY:20541099-20547636	0	0	0	0	0	0	0	0	0	0	0	0	0	0.0607757	0	0.037743	0	0	0	0	0	0	0	0	0	0	0.0734657	0	0	0	0	0	0	0	0	0	0	0	0	0	0	0	0	0	0	0	0	0
2213	chr6:77658207-77666402	0	0.0536225	0	0.0375924	0	0.0467882	0	0	0	0	0	0	0	0.0969623	0	0	0	0.0581218	0	0	0	0	0	0	0	0.0556365	0	0	0	0	0	0.0707203	0	0	0	0	0	0	0.0472255	0.0345833	0	0.0479604	0	0	0	0	0	0
3288	chr10:68861132-68868373	0	0.121373	0.0581075	0.0425445	0	0	0	0	0	0	0	0	0	0.109735	0	0	0	0	0	0	0	0	0	0	0	0	0	0.0888005	0.0294053	0	0	0	0	0	0.0496511	0	0	0.0600234	0	0.0391391	0	0	0	0	0	0	0	0
2329	chr6:125700303-125707480	0	0.0612274	0	0	0.0639336	0.0534238	0	0	0	0	0.0596089	0	0	0	0	0	0	0	0	0	0	0	0	0	0	0	0.0669154	0	0	0	0	0	0	0	0.0500938	0.0688936	0	0.0605585	0	0	0	0	0	0.037195	0	0.0689459	0.116018	0
2287	chr6:110499173-110506068	0	0.0637311	0	0	0	0.0556084	0	0	0	0	0	0	0	0.0576206	0	0	0	0	0	0	0.0667071	0	0.119685	0	0	0	0	0	0	0	0	0	0	0	0	0	0	0	0.0561282	0	0	0	0	0	0	0	0.120762	0
3286	chr10:67683765-67690648	0	0	0	0	0	0.334232	0	0.0867029	0	0	0	0.0365146	0	0	0	0	0	0	0	0	0	0	0	0.0415772	0	0	0	0	0.216542	0	0	0	0	0	0	0	0	0	0	0	0	0.057101	0	0	0	0	0	0
1310	chr4:9505689-9519520	0	0.0317734	0.0912697	0	0	0	0	0.0215754	0	0	0	0.0181728	0	0.028727	0	0.0178401	0.0141638	0	0.0307278	0	0	0	0	0.0206924	0.0271992	0	0.0347252	0	0	0.0329773	0	0	0	0	0.0259958	0	0.0598037	0.0314263	0.0559659	0.040984	0.0211944	0	0	0	0	0	0.0301033	0
5651	chrX:114040288-114044811	0	0.0971463	0	0	0	0	0	0	0	0	0	0	0	0	0	0	0.0433056	0	0	0.067249	0	0	0	0	0	0	0	0	0	0	0	0	0	0.103751	0	0	0	0	0	0	0	0.0868885	0	0	0	0	0.09204	0
3194	chr10:14984386-14998891	0.0915859	0.0302971	0.0290097	0.0849599	0.0316363	0	0	0.0617189	0	0	0.0294962	0	0	0.0273922	0	0	0	0	0	0.041946	0	0	0	0	0	0	0	0.0443329	0	0	0	0	0	0	0	0	0	0.0898985	0.0266828	0	0.0202096	0.027098	0	0.0184052	0	0	0	0
2965	chr8:132075615-132086002	0	0.0423075	0	0.0593198	0	0	0	0	0	0	0	0	0	0	0	0	0	0	0	0	0	0	0	0.0275527	0	0.0438965	0	0.0309537	0.0409999	0.0439105	0.0427283	0	0	0	0.0346143	0	0	0.0418453	0.0372603	0.0272858	0	0.0378401	0.0429483	0.0257013	0	0	0	0
1289	chr4:3977337-3986411	0	0	0	0	0.0505692	0	0	0.06577	0	0	0	0	0	0	0	0	0	0.0524922	0.0936698	0	0	0.0502592	0	0.0630782	0	0.0502476	0	0	0	0.0502636	0	0.0319352	0	0	0	0.0272462	0	0	0	0	0	0.043315	0	0.0294199	0	0.0545337	0	0
2525	chr7:65403285-65422188	0	0.0232485	0	0.032597	0	0.0202854	0	0	0	0.0459013	0.022634	0	0	0	0.0234426	0.0130535	0	0	0.0224834	0.0160936	0	0	0	0	0	0	0.0254083	0.0340189	0.011265	0	0.0234797	0.0459921	0	0.049658	0	0	0.0218791	0.0229946	0.0409501	0	0.0155079	0	0	0.0282465	0	0.0261793	0.0220265	0.0356813
2328	chr6:124890407-124897762	0	0.0597458	0.0572069	0	0	0.052131	0	0	0	0	0	0.0341717	0	0.0540173	0	0	0	0	0.0577796	0	0	0	0	0	0	0	0.0652962	0	0	0	0	0	0	0	0	0	0	0	0.105237	0	0.0797066	0.0534371	0	0	0	0	0	0.0458482
5511	chrX:78214664-78217277	0	0.168129	0	0	0	0	0	0	0	0	0.163685	0	0	0	0	0	0	0	0	0	0	0	0	0	0	0	0	0	0	0	0	0	0	0	0	0	0	0	0	0	0	0	0.170676	0	0	0	0	0
5732	chrX:142423016-142428961	0	0	0	0	0.0771806	0	0	0	0	0.145933	0.0719597	0	0	0	0	0	0	0	0	0	0	0	0	0	0	0	0	0	0	0.0767142	0.0746487	0	0	0	0.0604731	0	0	0	0.0650959	0	0.0986078	0	0	0	0	0	0	0
3142	chr9:108792594-108800781	0	0.0536749	0	0	0	0.0468339	0	0	0	0	0.052256	0	0	0	0	0	0	0	0	0.0371561	0.0280906	0	0	0	0.160817	0	0.0586613	0	0	0	0	0	0.109845	0	0.0439147	0	0.0505132	0.0530886	0	0	0	0	0	0.0326069	0	0	0	0
2003	chr5:139502943-139512402	0	0.0464577	0.0444835	0.0325695	0	0.0405366	0	0	0	0	0	0	0	0	0.0936911	0	0	0.100712	0	0	0	0	0	0	0	0	0	0	0	0	0	0	0	0.049616	0	0	0.0437212	0	0.0409155	0.0299625	0	0.0415522	0.0471614	0.0282226	0	0	0	0.0356511
1712	chr4:173098723-173106034	0.0605646	0.0601053	0	0	0	0	0	0.0408139	0	0	0	0	0	0.108685	0	0	0	0.0651486	0	0	0	0	0.0564377	0	0	0	0	0	0	0.0623827	0	0.0396351	0.0307511	0	0	0	0	0.0594487	0	0	0	0	0	0	0	0	0	0
5105	chrY:13169765-13175843	0	0	0	0	0	0	0	0	0	0	0	0	0	0.0653646	0.0729	0.0405928	0	0	0	0	0	0	0	0	0	0	0	0	0	0	0	0	0	0	0	0	0	0	0	0	0	0	0	0	0	0	0	0.0554794
1308	chr4:9476817-9480370	0.124606	0	0	0.0866931	0	0	0	0	0	0	0	0	0	0	0	0	0	0	0	0	0	0	0	0	0	0	0	0	0	0	0	0	0	0	0	0	0	0	0	0	0	0	0	0	0	0.13925	0.117161	0
1555	chr4:107584696-107597311	0	0	0	0	0	0	0.0356504	0.023655	0	0	0.0339151	0.0199244	0	0	0.0702535	0	0	0.0377589	0.0336895	0	0	0	0	0	0	0	0	0	0	0.0723117	0	0	0	0	0.0285014	0	0	0	0	0.0449342	0	0	0	0.0211625	0	0	0	0
5466	chrX:71778379-71784752	0	0.0689504	0	0	0.0719981	0.120325	0	0.0468201	0	0	0	0	0	0	0.0695261	0	0	0	0.0666813	0.0477305	0	0	0	0	0	0.0715401	0	0.0504466	0	0	0	0	0	0	0	0	0	0	0	0	0	0	0	0	0.0776816	0	0	0
5099	chrY:12599792-12608723	0	0	0	0	0	0	0	0	0	0	0	0	0	0	0	0	0	0	0	0	0	0	0	0	0	0.102104	0.053775	0	0	0	0	0	0	0	0	0	0	0	0	0	0	0	0	0	0	0	0	0
1932	chr5:106977917-106986698	0	0.0500444	0	0	0	0	0	0	0	0	0	0	0	0.0452461	0	0	0	0	0.0483975	0	0	0	0	0	0	0	0.0546935	0.0366143	0	0	0.101084	0.0330006	0	0.0534466	0	0.0281552	0	0	0	0	0	0	0	0	0	0	0	0.0384035
1290	chr4:3999152-4005713	0	0	0	0	0	0	0	0	0	0	0	0.0383064	0	0	0.0675341	0	0	0	0	0	0.0350512	0.0695066	0.125776	0	0	0	0.073197	0	0	0	0	0	0	0	0	0	0	0	0.0589851	0	0	0	0	0	0	0	0	0
6199	chr1:223022050-223030156	0	0.0542112	0	0	0	0	0	0.0368116	0	0	0	0	0	0	0	0	0	0.0587599	0.0524271	0	0	0	0	0.035305	0	0	0	0.0396628	0	0	0	0	0	0	0	0	0	0	0	0	0	0	0.0550323	0	0	0	0	0
3683	chr12:7178839-7189374	0	0.0417132	0	0.0292433	0	0.0727934	0.0426884	0	0	0	0.0406105	0	0	0	0	0	0	0.0452132	0.0403404	0	0	0.0432899	0	0	0	0	0.0455883	0.0305188	0	0	0	0	0	0	0.0341281	0	0	0	0.0367369	0.0538051	0	0.0373086	0	0	0	0.0469717	0	0
939	chr3:46111371-46118653	0	0.120689	0	0	0	0	0	0	0	0	0.0587495	0.0690283	0	0	0	0.0677644	0	0	0.116717	0	0	0	0	0.0392994	0	0	0.0659507	0	0	0	0	0	0	0	0	0	0	0	0	0	0	0.0539727	0	0	0	0	0	0
6087	chr1:161486732-161495378	0	0.0508257	0	0	0	0.0443478	0	0	0	0	0	0	0	0	0.05125	0	0	0	0.0983061	0	0	0	0	0	0	0	0	0.0371859	0	0	0	0	0	0	0.0415836	0.0285948	0	0	0.0447624	0	0	0	0	0	0	0	0	0.039003
5678	chrX:119318691-119324645	0	0	0	0.0517392	0	0.128791	0	0	0	0	0	0	0	0	0	0	0	0	0	0	0	0	0	0	0	0	0.080658	0.107992	0	0	0	0.0486669	0	0	0	0	0.0694546	0	0	0	0	0.066009	0	0	0	0	0.0699226	0
2424	chr7:11594242-11600178	0	0	0.0708799	0	0	0.0645908	0	0	0	0	0	0	0	0	0	0	0	0.0802369	0	0	0	0.0768237	0	0.0482091	0	0.0768059	0	0	0	0	0	0	0	0	0	0	0	0	0.0651946	0	0	0.0662091	0	0	0	0.0833575	0	0
6085	chr1:161472931-161480292	0	0	0	0	0.0623357	0	0	0	0	0	0	0.0341438	0	0.0539733	0.0601955	0	0	0	0	0	0	0	0.0560544	0.0388777	0	0	0.065243	0	0	0	0	0	0	0	0	0	0.0561807	0	0	0	0	0	0	0	0	0	0.0565592	0.0458108
844	chr2:238204719-238211677	0	0	0	0	0.0659456	0	0	0	0	0	0	0	0	0.0570989	0	0.106379	0	0	0.0610758	0.0437181	0	0.0655414	0.0593005	0.0411291	0	0	0	0.0462059	0	0	0	0	0	0	0	0	0	0	0.0556201	0	0	0	0	0	0	0	0	0.0484638
3720	chr12:14702785-14710642	0.0563564	0	0	0	0	0.0488007	0	0	0	0.0552124	0	0.0319886	0	0	0	0	0	0	0	0	0	0	0.0525162	0.0364237	0	0.0580296	0	0	0	0	0	0	0	0	0	0	0	0	0.0492569	0.0360709	0.0373073	0	0	0	0	0	0	0
5841	chr1:21389829-21402141	0.0359659	0.0713863	0	0.0250229	0.0372708	0.031144	0.0365277	0	0.0207129	0	0.0347497	0	0.0189718	0	0	0.0200409	0	0	0	0	0	0	0.0335152	0.0464903	0	0.0740675	0	0	0	0	0.0360482	0	0	0	0.0292027	0.0200811	0	0	0	0	0	0	0	0.0216832	0	0.0401928	0	0
4133	chr14:45491976-45501194	0.0480365	0	0	0	0	0	0	0	0	0	0.046412	0	0	0	0	0.0267669	0	0	0	0.0330008	0	0	0	0.0310465	0	0.0494627	0	0	0	0	0	0	0.0487802	0.0509131	0	0	0	0	0	0	0.0317996	0	0	0	0	0	0	0
3783	chr12:46032127-46035283	0	0	0	0	0.290729	0.121468	0	0	0	0	0	0	0	0	0	0.078164	0	0	0	0	0	0	0	0	0	0	0	0	0	0	0.140596	0	0	0	0	0	0	0	0	0	0	0	0	0	0	0	0	0
6224	chr1:232229606-232234799	0	0	0.0810193	0	0	0	0	0	0	0	0	0	0	0.076502	0	0	0	0	0	0	0	0	0	0	0	0	0	0.0619073	0	0	0	0	0	0	0	0	0	0	0	0	0.0564422	0	0	0	0.0953297	0	0.0801673	0.129865
1271	chr3:191185385-191191000	0	0.156514	0.0749313	0	0	0.136565	0	0	0	0	0	0	0	0	0	0	0	0.0848231	0	0	0.0409555	0.0812148	0	0	0	0	0	0	0	0	0	0	0	0.0835769	0	0.0440276	0	0	0	0	0	0	0	0	0	0	0	0
3089	chr9:85458366-85466868	0	0	0	0	0	0.0450989	0	0.0350972	0	0.0510242	0.10064	0.0591242	0.0412089	0	0	0	0	0	0	0	0	0	0	0	0	0	0	0	0	0	0	0	0	0	0.0422878	0	0	0	0.0455205	0	0	0.0462288	0.0524693	0	0	0	0	0
2846	chr8:64764926-64777239	0	0.0356903	0.0341736	0.0250209	0	0	0	0	0	0	0	0	0	0	0	0.0400786	0.0159099	0	0	0.0247064	0.0373568	0.0370393	0	0.0232433	0	0.0370307	0	0.0261123	0	0	0	0	0	0	0	0.0200795	0	0	0.0942976	0.0230181	0	0.0319217	0	0.0433629	0	0.0401895	0	0
1084	chr3:120616846-120623596	0	0	0	0	0	0	0	0	0	0	0	0	0.0865056	0	0	0	0	0.0705623	0	0.0450651	0	0	0	0	0	0	0	0	0	0	0.0657475	0.0858574	0	0	0	0	0.0612653	0	0	0	0.0434248	0	0	0.0790951	0	0	0	0
2038	chr5:163334352-163340585	0	0.0704989	0	0	0.073615	0.0615136	0	0	0	0.0695955	0	0	0	0	0	0.0395836	0	0	0	0	0	0	0	0	0	0	0	0	0	0.0731701	0	0.0464889	0	0	0.0576794	0.079326	0	0.0697288	0	0.136403	0	0	0	0.0428273	0	0	0	0
2740	chr8:12706878-12713376	0	0	0	0	0	0	0	0	0	0	0	0	0	0	0	0.075939	0	0	0	0	0	0.0701804	0	0	0	0	0	0.0494763	0	0	0	0	0	0.0722215	0	0	0	0	0.0595569	0.0872273	0	0	0	0.082162	0	0	0	0.051894
6035	chr1:119483760-119489557	0	0	0	0	0.0791507	0	0	0	0	0	0	0.043354	0	0	0	0	0	0	0	0	0	0.0786655	0	0	0	0	0	0	0	0	0	0	0	0	0	0	0	0	0	0	0	0.0677964	0	0	0	0	0	0
4059	chr13:110965846-110972486	0	0.0661783	0.0633661	0.0927894	0	0.0577437	0.0677255	0	0	0.0653303	0	0	0	0	0.0667308	0	0	0	0	0	0	0	0	0	0	0	0.0723263	0	0	0	0	0	0	0	0	0	0	0.0654554	0	0.0426811	0	0	0	0	0	0	0	0.0507844
3694	chr12:8804844-8810581	0	0	0	0	0	0	0	0	0	0	0	0	0	0	0	0	0	0	0	0	0	0.079488	0.0719192	0	0	0	0	0	0	0	0.0773547	0	0	0	0	0	0	0.0757562	0	0.0493979	0	0	0	0	0	0	0	0
2647	chr7:138439420-138450594	0.0396285	0.0786559	0.0753135	0	0	0	0	0.0267053	0	0	0	0.0224937	0.0104519	0	0	0	0	0	0.0380337	0	0	0	0	0	0	0	0	0	0.114337	0	0	0.0259339	0	0	0	0	0	0	0	0.0507284	0	0	0	0.0238913	0	0.0442858	0	0.0603596
5306	chrX:16216873-16222271	0	0	0	0.0570675	0.0850001	0	0.0833052	0	0	0	0	0	0	0	0	0	0	0	0	0	0	0	0	0	0	0	0	0	0	0	0	0	0	0	0	0.0915944	0	0	0.0716911	0	0	0.0728067	0	0	0	0	0	0
5048	chrY:7500590-7509604	0	0	0	0	0	0	0	0	0	0	0	0.0278832	0	0	0	0	0	0	0	0	0.0255137	0.0505937	0	0	0	0	0	0.0356679	0	0	0	0	0	0	0	0	0	0	0	0	0	0	0	0	0	0	0	0
2224	chr6:80475484-80488343	0	0.0683499	0	0	0	0.0596385	0.034974	0.0232062	0	0.0337371	0	0	0	0	0	0.038377	0	0.0370425	0	0	0.0178854	0	0	0	0	0	0	0	0	0	0.0345149	0.0225359	0	0	0.0559212	0	0	0.0338017	0.030098	0	0.0227963	0	0	0	0	0	0.0323786	0
2650	chr7:139461619-139468664	0	0	0	0.043728	0	0	0	0	0	0	0	0	0	0	0	0	0	0	0.0603217	0	0	0	0	0.0406213	0	0	0	0	0	0.0647378	0	0	0	0	0.153097	0	0	0	0.109867	0.0804556	0	0	0	0	0.0702728	0	0.0590958	0
3346	chr10:103205480-103213543	0	0	0.0521843	0	0	0.047554	0	0	0	0	0	0	0	0	0	0	0	0	0.0527067	0.0377275	0	0.113121	0.102349	0	0	0	0	0	0	0	0	0.0359389	0	0	0	0	0	0	0	0	0.0727086	0	0	0.0331083	0	0	0	0
1295	chr4:4160756-4164310	0	0	0.118372	0	0	0	0	0	0	0	0	0	0	0	0	0.0694132	0	0	0	0	0	0.128299	0.116082	0	0	0	0	0	0	0	0	0	0	0.13203	0	0.0695525	0	0	0	0	0	0.110572	0	0	0	0	0	0
3301	chr10:80104701-80116174	0	0.0766062	0	0	0	0	0	0.0260094	0	0	0.0372906	0	0	0	0	0	0	0	0	0	0	0.039751	0.0359659	0	0.081972	0	0	0.0280239	0	0	0.0773682	0	0	0	0	0	0	0.0378847	0.0337337	0	0.02555	0	0	0	0	0	0	0
4712	chr19:35572434-35575371	0	0.149588	0	0	0	0	0	0.101576	0	0	0	0	0	0	0	0	0	0	0	0	0	0	0	0	0	0	0	0	0	0	0	0	0	0	0	0	0	0	0	0	0	0	0	0	0	0	0	0
3408	chr11:15011625-15027098	0	0.0284018	0	0	0	0	0	0.019286	0	0	0.0553021	0	0	0	0	0	0	0	0	0.019661	0	0	0.0266688	0.0184967	0	0.0589371	0.0310404	0.0207798	0	0	0	0.0187289	0	0.0303327	0	0	0	0	0	0.0183175	0	0	0	0	0	0.0319822	0.0538179	0.0217952
2468	chr7:40141770-40148199	0	0	0	0.0479171	0	0	0.0699479	0	0	0	0	0	0	0.0617965	0	0	0	0	0.0661006	0	0	0	0	0	0	0	0	0.0500072	0	0.0709397	0	0.0450718	0	0	0	0.038454	0.0643238	0	0	0	0	0	0	0	0	0	0	0
1474	chr4:77392267-77400204	0	0	0	0	0	0	0.0566597	0.0375953	0	0	0	0	0	0	0	0.0310864	0	0	0	0	0	0	0	0	0	0	0	0	0	0	0	0	0	0	0	0	0.104208	0	0.0487604	0.0357074	0	0.0495192	0	0	0	0	0	0.0424867
831	chr2:224296626-224304268	0	0	0	0	0	0.0501735	0	0	0	0.113531	0	0	0	0	0	0	0	0	0	0	0	0.0596758	0.0539935	0	0	0	0.0628443	0	0	0	0	0	0	0.0614114	0.0470461	0	0	0	0	0	0	0.0514305	0	0	0	0	0	0.0441266
3183	chr10:5038323-5047524	0	0	0	0	0.0498713	0.0416731	0.0488769	0	0	0	0	0	0	0	0	0	0	0	0	0	0	0	0	0	0	0	0	0	0	0	0	0	0	0.0510071	0.0390756	0	0	0	0.0420626	0	0	0	0	0	0	0	0	0
2993	chr9:3809395-3816769	0	0	0	0	0	0.0519967	0	0	0	0	0	0	0	0	0	0.066919	0.0265647	0	0.0576307	0	0	0	0	0	0	0	0	0	0	0	0	0	0	0.0636431	0	0	0	0.0589409	0.104966	0.0768665	0.0397506	0	0.0604944	0	0.0671379	0	0	0
4295	chr15:82372396-82380476	0	0	0.0520745	0	0	0	0.111314	0	0	0	0	0.0622118	0	0	0.0548396	0	0	0	0	0.0376481	0	0	0	0	0	0	0	0	0	0	0.0549265	0	0.139124	0	0	0	0	0	0	0.0350755	0.0725556	0	0	0	0	0	0	0
5889	chr1:52217101-52225744	0	0.0508434	0	0.0356441	0.0530907	0.0443632	0	0.0345247	0	0	0	0	0	0	0.0512678	0	0	0.0551095	0	0	0	0	0	0	0	0	0	0	0	0	0	0	0	0	0.041598	0	0	0.050288	0	0	0.101745	0	0	0.0926604	0.0572816	0	0	0
6075	chr1:157268909-157278348	0	0.0931123	0	0	0	0	0	0	0	0	0	0	0.0247457	0.0420923	0	0.0522805	0	0	0	0	0	0	0	0.0606393	0	0.0483047	0.0508812	0.0340621	0	0	0	0.0307004	0	0	0	0	0	0	0	0	0	0	0	0.0282824	0	0	0.044109	0
3092	chr9:86147196-86163550	0	0	0.02573	0	0	0	0	0.0182471	0	0	0	0.0307388	0	0.0242954	0.0541925	0	0	0.0291266	0.0519751	0.0186019	0.0140633	0	0	0.0350006	0	0	0	0	0	0	0	0.0177201	0	0	0.0439711	0.0302365	0.025289	0.0265784	0.0473324	0	0.0179249	0	0	0.0163244	0.0302747	0	0.0254594	0
3520	chr11:63452680-63459317	0	0.0662082	0.0633947	0	0	0	0	0.0449581	0	0	0	0	0	0	0.0667609	0.0371744	0	0	0.0640293	0	0	0	0	0.043118	0	0	0	0	0	0	0	0	0	0	0	0	0	0	0	0	0	0	0	0	0	0.0745546	0	0
5415	chrX:57769177-57779484	0.0429616	0	0	0	0	0	0	0	0	0.0420895	0.0415088	0	0	0	0	0.0478781	0	0	0	0.0295144	0	0	0	0	0	0.0442372	0	0	0	0.0442513	0	0	0	0	0.0348829	0	0.0802488	0	0	0	0	0.0381338	0	0.0259008	0	0	0	0
549	chr2:60417619-60424938	0	0	0	0	0	0	0	0	0	0.0592703	0	0.0686794	0	0	0	0.0337109	0	0	0	0.0415621	0	0	0	0.0782015	0	0	0.131235	0	0	0	0	0	0	0	0	0	0.056503	0.0593838	0	0	0	0	0	0.0364734	0	0	0.0568837	0
2856	chr8:71674937-71683238	0	0	0	0.0371124	0.0552777	0	0.0541755	0	0	0	0.0515385	0	0	0	0	0	0	0.114759	0.0511957	0	0	0	0.0497076	0	0	0	0	0	0	0.0549437	0	0	0	0	0	0	0	0	0.0466225	0.0341418	0	0	0	0	0	0	0	0
4314	chr15:92207154-92214974	0	0	0	0	0.0586774	0	0	0	0	0	0	0.03214	0	0.0508057	0.0566627	0	0	0	0	0	0	0	0	0.036596	0	0	0	0	0	0	0.0567525	0	0	0	0	0.0316148	0.0528835	0.11116	0.0494899	0	0	0	0	0	0	0	0	0.0431223
5890	chr1:53424630-53432944	0	0.10571	0	0	0.110383	0	0	0	0	0	0	0.0302305	0	0.0955746	0.0532963	0	0	0.05729	0.0511156	0	0	0	0	0	0	0	0	0	0	0	0	0.0348541	0	0.0564483	0	0	0	0	0	0	0	0	0	0	0	0.0595181	0	0
2046	chr5:171000084-171008716	0.0512972	0.101816	0	0	0	0	0	0	0	0	0.0991249	0	0	0	0.0513332	0	0	0	0	0	0	0	0.0478017	0.0331539	0	0	0	0	0	0	0	0	0	0	0	0	0	0	0	0	0	0.0455327	0	0	0.0573546	0.0573258	0.0482322	0
4649	chr19:20769294-20780609	0	0	0.0371875	0	0	0	0.0397459	0	0	0.0766806	0	0	0	0	0	0.0436133	0	0.0420967	0.0375598	0	0	0	0	0	0	0	0	0.0284152	0	0	0	0	0	0	0.0317757	0.0218504	0	0	0	0	0.0777203	0	0.0394262	0	0	0	0	0
2841	chr8:63143705-63154359	0	0.0824946	0	0.0578334	0	0	0	0	0	0.0407188	0	0.0235914	0.0548099	0.0372925	0	0.0463189	0	0	0	0	0	0	0	0	0	0	0	0	0	0	0	0	0	0	0	0	0.0388177	0	0	0	0.0550279	0.0368919	0	0.0250573	0	0	0	0
1763	chr5:15059474-15065477	0	0	0	0	0	0	0.0749109	0	0	0	0	0	0	0	0	0.0410999	0	0	0	0	0	0	0	0	0	0	0	0	0	0	0	0	0	0	0	0.0411824	0	0	0	0.0472094	0.0976552	0	0	0	0	0	0	0
4495	chr18:2833587-2839450	0	0	0	0	0.0782598	0	0	0	0	0	0.072966	0	0	0	0	0.0420812	0	0	0	0.0518817	0	0.0777801	0	0	0	0	0	0	0	0	0	0	0	0	0	0	0	0	0	0	0.0499933	0	0	0	0	0	0	0
5331	chrX:30103769-30110574	0	0	0	0	0	0	0	0	0	0	0	0	0	0	0.065113	0	0	0.0699921	0	0	0	0	0	0.0420537	0	0	0	0	0	0.0670206	0	0.0851636	0	0	0	0	0	0	0.0568705	0.0416464	0	0	0	0	0	0	0	0.0495532
4074	chr14:21003301-21011512	0	0.107036	0	0	0	0	0	0.0363409	0	0	0	0.0306097	0	0	0	0	0	0	0.0517568	0	0	0.055541	0	0	0	0	0	0	0.103728	0	0	0	0	0	0.0437863	0	0	0	0	0.034516	0.0356991	0	0	0.0325116	0	0.0602647	0	0.0821382
1378	chr4:39485146-39490242	0	0.0862252	0	0	0	0	0	0	0	0	0	0	0	0	0	0	0	0	0	0	0	0	0	0.0561541	0	0.178927	0	0	0	0	0	0	0	0	0.0705461	0	0	0	0	0	0	0	0	0	0	0	0	0.0661682
3250	chr10:52028738-52039561	0	0	0	0	0	0	0.0831051	0.0275713	0	0.040083	0.0790599	0.0232231	0	0	0	0	0	0	0	0.0281074	0	0.0842761	0	0	0	0	0	0.0297068	0	0.0421418	0.0410071	0.0535498	0	0	0	0	0	0	0	0	0.0270843	0.0363159	0	0.0246661	0	0	0	0
[truncated: 1,997 more rows]
[truncated: 34 more columns]
