# Supplementary material for: Human Endogenous Retroviruses (HERVs) and Mammalian Apparent LTRs Retrotransposons (MaLRs) Are Dynamically Modulated in Different Stages of Immunity
Source: Biology (Basel). 2021 May 5;10(5):405. doi: 10.3390/biology10050405 (PMC8147956; doi:10.3390/biology10050405)
Supplement: Supplementary file 1 [file biology-10-00405-s001.zip › Sup_file_2.xlsx]

## Sheet: res_hervdb4_2nd
ID	baseMean	log2FoldChange	lfcSE	stat	pvalue	padj	source
010014302-HERV0911cL	4.54070739226891	-1.28943525169689	0.328630282901661	-3.92366534304672	8.72118618493763e-05	0.00725935723170318	hervdb4
010057501-MALR1004uL	5.43049316566019	1.89048993829593	0.47047037396216	4.01829752291265	5.86201505554921e-05	0.0053168752341262	hervdb4
010057602-MALR1003cL	4.31984293433941	3.63882550364712	0.615575371669925	5.911259077464	3.39502555356064e-09	1.45990305774054e-06	hervdb4
010098601-HERV0809cL	3.4433854252707	2.94386297511801	0.576444830439983	5.10692926653717	3.27436246571946e-07	7.10761123081719e-05	hervdb4
010116701-MALR1133cL	4.14770023666694	2.09064327513215	0.541974698339942	3.8574554892244	0.000114573535005367	0.00894070342198395	hervdb4
010116702-MALR1133cL	3.87520017393155	4.21845323998931	0.772620268275641	5.45993085245381	4.76320061137498e-08	1.38089045627347e-05	hervdb4
010117201-HERV1036uL	3.80655791155965	4.55026250609323	0.830095729492681	5.48161175202546	4.21468361368959e-08	1.25006795523296e-05	hervdb4
010161002-HERV0421cL	6.36262550216601	-1.05957308436311	0.274770704077811	-3.85620835350431	0.00011515934375339	0.00897973103894507	hervdb4
010229102-MALR1018uL	2.23179720082995	3.53719678509523	0.861842633390578	4.10422581577281	4.05671071892559e-05	0.00394453416689537	hervdb4
010287301-MALR1045cL	2.57589521114494	3.4450212556882	0.753538976790375	4.57178906705254	4.83577598542668e-06	0.000690580651219246	hervdb4
010287401-MALR1022uL	2.74113815246649	4.71118156343721	0.952417866143039	4.94654891609274	7.55407514167156e-07	0.000143246729817643	hervdb4
010290901-HERV0541cL	6.79417150014628	-1.75773734466271	0.401814650758866	-4.3744978968364	1.21712296573853e-05	0.00149140540808823	hervdb4
010290902-HERV0541cL	5.97885540735256	-1.50238004560288	0.387219628227087	-3.87991707053083	0.000104492085089042	0.00832052394850835	hervdb4
010308701-MALR1127uL	5.28153489575772	2.53886694068362	0.530553798297896	4.78531479527377	1.70719545992768e-06	0.000284789666936231	hervdb4
010309902-MALR1126uL	2.236449583953	3.00278594841564	0.778830135899526	3.85550816539412	0.00011548947549075	0.00899762449536574	hervdb4
010318101-MALR0820uL	7.00642623389851	-1.06618688281739	0.258226880544824	-4.12887643830063	3.64540229102446e-05	0.00362264462494648	hervdb4
010330301-MALR1001cL	4.69229846912052	2.3038739722678	0.545827128739356	4.2208857914205	2.43344209115461e-05	0.0026023207225654	hervdb4
010330302-MALR1001cL	5.5131993991124	2.03754012735446	0.508082757986859	4.01025245459551	6.06538613785423e-05	0.00545853292935211	hervdb4
010333502-HERV0912cL	5.56704730365169	6.17110687938601	1.490972093882	4.13898214776003	3.48850091462699e-05	0.00349172075971693	hervdb4
010334602-HERV0492uL	15.9002477348974	1.01077041284896	0.217059074679774	4.65666047061218	3.2137980075808e-06	0.000489360326718161	hervdb4
010352401-MALR1026uL	18.546697203089	1.870248706725	0.336649917162718	5.55547056861749	2.76864864218952e-08	8.70268525192579e-06	hervdb4
010352402-MALR1026uL	37.2403404807488	1.01296977345915	0.221334714830251	4.57664209717862	4.7249880437262e-06	0.00067810808558059	hervdb4
010405401-MALR1127cL	3.20578061829634	4.73546288700189	1.09806126368808	4.31256710677217	1.61369880454919e-05	0.00187113594877327	hervdb4
010405402-MALR1127cL	1.95982762972964	3.95923020307848	0.947067016192676	4.18051746643555	2.90846468756767e-05	0.00301732560801116	hervdb4
010410501-MALR1041uL	8.48480956869399	-1.13815523134466	0.283433442781423	-4.01559964193207	5.92948399856867e-05	0.00536404988838191	hervdb4
010447101-MALR1018uL	27.1793876272483	1.88085374107815	0.334208937638616	5.62777810302591	1.82545705458911e-08	6.1382762314294e-06	hervdb4
010454901-MALR1017uL	6.2754613508916	-1.4932322745893	0.361402785850788	-4.13176747122755	3.59984485625587e-05	0.00358558599890331	hervdb4
010455504-HERV0890cI	6.5254817306084	3.92319724980745	0.661684716406632	5.92910362372113	3.04592831490556e-09	1.32702041179111e-06	hervdb4
010474801-HERV0741cL	19.1008657844396	-1.01427507830612	0.22395695328232	-4.52888407098271	5.92960194782963e-06	0.0008201237417042	hervdb4
010510902-HERV0491uL	36.0194760728536	-1.80128263438858	0.41045905847024	-4.388458720102	1.14156796538063e-05	0.00141599876756569	hervdb4
010542701-HERV1028uL	10.6284284642022	1.00279819997644	0.227994124623976	4.39835106115268	1.09076441222983e-05	0.00136305202842267	hervdb4
010552401-MALR1021uI	3.25910477045583	3.94942939364348	0.818336594070027	4.82616740136335	1.39185529646311e-06	0.000241863607901166	hervdb4
010561602-HERV0419cL	1.99089447432613	5.01883618215856	1.25772037139281	3.99042290823408	6.59555850756912e-05	0.0058224134146442	hervdb4
010630002-MALR0820cL	4.66697340286103	6.0568932749199	1.25968973810293	4.80824213432226	1.52263272623138e-06	0.000260287688993504	hervdb4
010635002-HERV0616cL	2.35868804613383	-2.153067128571	0.563042916017053	-3.82398404690307	0.00013131241502235	0.00996458216948519	hervdb4
010645101-HERV1029cL	4.71886081501083	-1.1883868979954	0.298628811632097	-3.97947837484438	6.90666418874148e-05	0.00602047376733753	hervdb4
010790301-HERV0958cI	4.79538358433118	3.01071401543848	0.673039979458147	4.47330635226507	7.70193084530437e-06	0.00102129309970864	hervdb4
010911101-MALR1018cL	7.5487529927326	4.23364296482179	0.637596719387399	6.64000117329566	3.13680655574284e-11	2.95548963990506e-08	hervdb4
010912001ERVH5LU3I	5.9374190486225	1.51824604100604	0.389356051801404	3.89937702003522	9.64405057060375e-05	0.00783398508663604	hervdb4
011035903-HERV0897uL	3.7338484033604	2.7907829359175	0.667536703722042	4.18071833407315	2.90589639317323e-05	0.00301556269844191	hervdb4
011148501-MALR1126uL	1.4229928446891	2.39603006682595	0.621822970289495	3.85323505452116	0.000116567387642821	0.00906326561988846	hervdb4
011152703-HERV0116cI	9.47602485580781	2.56767757223817	0.455208067597988	5.64066798241762	1.69391718017159e-08	5.75732752069682e-06	hervdb4
011163202-MALR0818uL	1.64074720220935	2.79623643589771	0.702156831352807	3.98235310266846	6.82363002244229e-05	0.00597360264981817	hervdb4
011215303ERVHsLU3I	15.0358447228794	1.53674705857984	0.309947328976984	4.95809098807868	7.11892234825141e-07	0.000136395973939106	hervdb4
011215803-HERV0599uL	3.98006329548454	2.19136134828895	0.567819096901248	3.85925968367009	0.000113731035008889	0.00888895129927584	hervdb4
011223701-HERV0501uI	24.9968162777824	2.91065747354726	0.441941043198588	6.58607639716175	4.51601514933701e-11	4.03904014722404e-08	hervdb4
011269601-HERV0572cL	5.6351212092774	4.8162995049351	0.883591912421826	5.45081890998092	5.0138405126773e-08	1.44510210524026e-05	hervdb4
011384502-MALR1134uL	21.2825889186002	2.27765654856554	0.303188686164744	7.51234017791788	5.80796274531964e-14	1.61238338550466e-10	hervdb4
011614502-HERV0739uL	13.4028385983192	1.8216969668514	0.379046727405996	4.80599576553047	1.53983157752952e-06	0.000261918978971267	hervdb4
011679202-MALR0818cL	5.16992878987688	2.01924706982212	0.414478898301061	4.87177291316629	1.1060125042509e-06	0.000198350624922556	hervdb4
011683302-MALR1023uL	3.37480093722278	3.4938548124449	0.682240560668846	5.12114789689378	3.03681345420719e-07	6.64880129261185e-05	hervdb4
011686402-MALR1023uL	7.16152545676106	4.38862485298426	0.675406061951986	6.4977575716462	8.15260365866579e-11	6.45917014070823e-08	hervdb4
011693902-HERV0400cL	8.05907417072291	5.09086730640904	0.836133673791638	6.08858064922005	1.13916065790308e-09	5.74580714397569e-07	hervdb4
011694503-MALR1016cI	3.28771506345727	3.19877314455794	0.695787307055183	4.59734334346552	4.27912144090441e-06	0.000624186936705611	hervdb4
011721202-MALR1015cL	7.99803940222048	2.30386868001669	0.418413798102125	5.50619671355667	3.66668799772331e-08	1.1026118448613e-05	hervdb4
011740801-HERV0466cL	9.09435629443391	1.55116572173367	0.343542879745662	4.51520265208832	6.32562460735546e-06	0.000863200256092997	hervdb4
011753203-MALR1011cI	24.6659952163525	2.76731788708078	0.406625823099043	6.80556356699151	1.00654422206364e-11	1.15277549815355e-08	hervdb4
011760201-HERV0549uL	82.1105065472813	1.76895693720312	0.25824438122237	6.84993388367238	7.38841279317823e-12	8.90252433155802e-09	hervdb4
011789102-MALR1130uL	3.79332079762573	5.15452787352493	0.958965496903197	5.37509210724529	7.65435433819256e-08	2.07192983029609e-05	hervdb4
011790805-HERV0183cL	28.5379256167148	2.63634533583232	0.355512850969289	7.41561192132562	1.21064517555704e-13	2.9174867279292e-10	hervdb4
011792601-MALR1003uL	6.37878192717215	-1.36780527661265	0.291746688698566	-4.68833179466133	2.75441178580457e-06	0.000428625999062736	hervdb4
011827401HK05gag	9.24217155419293	2.29103587752207	0.458936944350422	4.99204935607177	5.97419829208607e-07	0.000118331409321901	hervdb4
011828804-HERV0204cI	6.24029716102596	-1.52860506278668	0.287711337505183	-5.3129816712876	1.0784588907951e-07	2.74979283088697e-05	hervdb4
011829401-HERV0883uL	27.0477539833744	2.56094636120852	0.354815949500582	7.21767543091893	5.28837505567101e-13	1.00282618132183e-09	hervdb4
011848501HK025LU3	2.97228200518635	-1.38930851951363	0.339786380769841	-4.0887704691575	4.33665698028025e-05	0.00416756218581239	hervdb4
011864301-MALR1001uL	20.0174385991181	1.30577103253547	0.310707416816126	4.20257438948814	2.63896483439939e-05	0.0027826605190923	hervdb4
011943501-MALR0818uL	13.7363269052372	7.17427792530719	1.02322428183535	7.01144221522846	2.35873910028186e-12	3.49798992555475e-09	hervdb4
011943801-MALR1127uL	29.6695660995748	-1.13814580929032	0.279580965287053	-4.07089877567938	4.68320975886485e-05	0.00443429045162696	hervdb4
011943902-MALR1022uL	39.1170728064972	1.37223773456652	0.265498577277698	5.16853140471341	2.35940646104004e-07	5.3478852391255e-05	hervdb4
012022304-HERV0198cI	9.56827273859325	4.05361616132717	0.615786309134527	6.58282930490032	4.61578973626019e-11	4.10710603660772e-08	hervdb4
012024102-MALR0819uL	11.1470969250973	4.04847214727527	0.580850330901935	6.96990589811469	3.17153052218693e-12	4.3996665993349e-09	hervdb4
012036002-MALR1004cL	7.26184658764153	6.64201333147945	0.948450747994452	7.00301343588408	2.50514797362436e-12	3.66808628610602e-09	hervdb4
012036301-MALR1041cL	8.6730658684855	6.49986426851495	1.2711400020901	5.11341335952561	3.16388906071782e-07	6.90523762169999e-05	hervdb4
012036302-MALR1041cL	2.44243174195532	5.00832805337394	1.16570540909124	4.29639256566402	1.73600042769938e-05	0.00198362485485756	hervdb4
012038701-MALR0818uL	6.55686358861841	6.72582835446846	1.65193120968006	4.07149420935699	4.67125237919883e-05	0.00442780114894722	hervdb4
012040102-MALR1024uL	4.25212086526692	5.20729379731032	0.968350628906969	5.37748790764775	7.55322843415157e-08	2.04775104001506e-05	hervdb4
012088401-MALR1023cL	3.6435287097273	5.96156135411583	1.12036030871849	5.3211108138371	1.03135552476133e-07	2.65308372277744e-05	hervdb4
012095901-HERV0590uL	5.11251902717542	-1.06827618052988	0.270660871157252	-3.94691769062258	7.91637566503133e-05	0.00672494659309467	hervdb4
012096102-HERV0563uL	5.40328285053987	-1.48068807412043	0.288522326978431	-5.1319705120468	2.86724427504228e-07	6.31339535739323e-05	hervdb4
012289302-MALR0818uL	20.3690436893427	1.66643631718579	0.405611825650594	4.10845101597533	3.98321663124612e-05	0.00389302304702289	hervdb4
012290402-HERV0617uL	5.18705456706868	2.70145515344974	0.507868148570004	5.31920570537093	1.04221247465775e-07	2.67902646633875e-05	hervdb4
012303202-HERV0869uL	2.19112378644924	5.00661330899995	1.14701130606243	4.36492062679585	1.27168925805487e-05	0.00154491255798293	hervdb4
012383401-MALR1044uL	3.80084957865196	4.1410007865625	0.877825269944055	4.71734060108159	2.38947477041782e-06	0.000378974193249722	hervdb4
012421101-MALR1042uL	2.13819333083562	-1.94260680798424	0.492090793249349	-3.94765932351003	7.89189973349605e-05	0.00670717006235379	hervdb4
012435401-MALR1018uL	15.607772224548	-1.29160633232184	0.335312451862573	-3.85194860837199	0.000117181619051005	0.00909513877053897	hervdb4
012464703HE413LU3p	5.04020403862914	1.99065647802194	0.413294100174118	4.81656156519846	1.46053116215666e-06	0.000251280874512446	hervdb4
012470702-MALR1018uL	8.54890135754674	-1.18290017703837	0.260062366205647	-4.54852501073909	5.40232237027026e-06	0.000758072749264532	hervdb4
012477001-MALR1019uL	4.09717963840785	-1.51770516890483	0.353989925517162	-4.28742475280204	1.80756458372008e-05	0.00205188440249441	hervdb4
012484402-MALR1134uL	3.04490986780085	-1.65337304862514	0.388351164680173	-4.2574175102237	2.06801927849189e-05	0.00228694725947182	hervdb4
012535101-MALR1126uL	3.18677309937306	3.19173150376553	0.658292785370194	4.84849838050503	1.24399546529386e-06	0.000220250666513407	hervdb4
012561202MR41sLU3	6.89706004003958	5.49655213741834	0.994675834461931	5.52597333420862	3.27663900093643e-08	1.00005212498237e-05	hervdb4
012698101-MALR1020uL	10.300642609053	1.35972740060476	0.307618741826224	4.42017086648408	9.86228899356904e-06	0.00125864919685151	hervdb4
012713401-HERV0801cL	1.83240042319617	3.77272281968231	0.976518161390615	3.86344357826356	0.000111799725264832	0.00876168488288208	hervdb4
012739802-MALR1002uL	34.0039344283419	-1.17244531831763	0.293555394829102	-3.99394914544216	6.4981806771785e-05	0.00575345710810368	hervdb4
012756403-HERV0883uL	5.46682551033193	-1.14326642466939	0.288303530518522	-3.96549574891848	7.32435578102271e-05	0.00630537817695485	hervdb4
012757302-MALR1017uL	8.01752884534991	-1.39414486229533	0.290426925821271	-4.80032923377527	1.58404997704934e-06	0.000267883539491063	hervdb4
012777102-HERV0740cL	43.5426266180578	1.42661098359082	0.347150716144446	4.10948593001669	3.96540873022206e-05	0.00388064336593812	hervdb4
012781601-HERV0487cL	7.2199146638394	3.25071608721986	0.594388732686119	5.46900691157023	4.52564103372606e-08	1.32084773046562e-05	hervdb4
012800901-HERV0739uL	5.10618342655243	-1.37611727480371	0.325366196615413	-4.22944143896515	2.34272250134638e-05	0.00252318920675736	hervdb4
012841502-MALR1010cL	1.61301250161857	3.81048903893966	0.828178054494786	4.6010504845654	4.20365518575521e-06	0.000615247753083414	hervdb4
012842302-HERV0797cL	6.42008017041884	5.59066214370399	0.828482706244546	6.74807343782233	1.49821117444693e-11	1.59148349252822e-08	hervdb4
013035404HFRDgag	4.47326324967912	2.81979240667123	0.672958471273031	4.19014326595376	2.78778381022354e-05	0.00291918146597397	hervdb4
013053602-HERV0557cL	5.53030761015598	5.22607850982521	0.853286540117814	6.12464660359419	9.08850985446551e-10	4.75700556515327e-07	hervdb4
013060005HRFBpol	12.6756537686994	-1.28005695296974	0.263649398370106	-4.85514839359817	1.20296624628317e-06	0.00021372240713967	hervdb4
013068301-HERV0871uL	5.53974228075856	-1.37806080742241	0.322614353951808	-4.27154213860016	1.94125835147529e-05	0.00217362479127691	hervdb4
013068302-HERV0871uL	23.1899351430834	-1.11968709162091	0.235738646447245	-4.74969678707932	2.03721870574987e-06	0.000332841636190829	hervdb4
020050102HK08sLR	5.75728953638371	-1.14891999948265	0.296114260277086	-3.87998875301567	0.000104461294993518	0.00831998131481538	hervdb4
020146201-HERV0415cL	8.87517976582348	5.69731522320668	0.898794000572018	6.33884429533436	2.31495039368099e-10	1.55987201090325e-07	hervdb4
020146202-HERV0415cL	12.0096925763641	6.09904820376729	0.854045539449554	7.14136181508333	9.24107474066782e-13	1.57972303276185e-09	hervdb4
020321201-HERV0796uL	9.07766171941168	-1.17665641401484	0.221877868313455	-5.30317161850742	1.13807835410608e-07	2.87644537830948e-05	hervdb4
020354902-MALR0819uL	3.21907262975214	5.20936293066541	0.887940778964271	5.86679095507001	4.4431026736436e-09	1.82466921870746e-06	hervdb4
020405501-HERV0950uL	4.22661845206629	3.43585967154424	0.725879537856066	4.73337446829301	2.2081755285707e-06	0.000354403770651436	hervdb4
020405502-HERV0950uL	32.0880423465916	4.98043808491668	0.649229281248309	7.67130847108515	1.70250554655474e-14	5.62669975967073e-11	hervdb4
020427901HK05gag	39.9631372159238	-1.01716349237045	0.19656938151246	-5.17457746747791	2.28427321543301e-07	5.2013680526218e-05	hervdb4
020451501-MALR1003uL	3.68939019824345	-1.85558307428274	0.477330084732131	-3.88742116542698	0.000101314876790849	0.00814792318515888	hervdb4
020451502-MALR1003uL	3.67420368845863	-2.14142435166123	0.451058038326377	-4.74755833995742	2.05887013274949e-06	0.000335431508669826	hervdb4
020562102-MALR1127uL	7.27393472365033	-1.93686726756325	0.349792502288516	-5.53718920471796	3.07364455071074e-08	9.53186891856695e-06	hervdb4
020635401-MALR1018uL	3.99141039966245	-1.49107393611296	0.357048597720998	-4.1761092065067	2.96537498547468e-05	0.00306445630571597	hervdb4
020635402-MALR1018uL	3.2355389056445	-1.71850005686073	0.441039740150471	-3.89647439995866	9.76031189786381e-05	0.00790068447584954	hervdb4
020686201-MALR1041uL	6.1306009767112	-1.59581899004195	0.364862238466962	-4.37375760436895	1.2212597874585e-05	0.00149594624583074	hervdb4
020698603-HERV0862cI	16.3512898660564	2.55980543174855	0.411283714436158	6.22394065677476	4.84820521115798e-10	2.89573867878837e-07	hervdb4
020798401-HERV0617cL	4.45229764643693	5.24669794948618	0.958938327471365	5.47136119099678	4.46592061416948e-08	1.31211495166539e-05	hervdb4
020893902-MALR0819uL	3.24313725114614	5.62707385129725	1.2657582686566	4.44561492556514	8.76408125281017e-06	0.00113624061436651	hervdb4
020904801-HERV0760cL	3.74081524814869	5.03274824415228	1.14163733660298	4.40835989047764	1.04156366642899e-05	0.00131369158159769	hervdb4
020936802-MALR1041uL	8.67849462009803	2.98189753307478	0.471290166625111	6.32709473746931	2.4981999054445e-10	1.66980102083577e-07	hervdb4
020936901-HERV0490cL	20.5742784168963	1.76012641013798	0.424168663618357	4.14959086115245	3.33070061173945e-05	0.00336326356788043	hervdb4
020950501-HERV0418cL	2.68663433510876	3.06305311637494	0.691118746685318	4.43202145950415	9.3353723986637e-06	0.00120072680866726	hervdb4
020950502-HERV0418cL	2.47150010923605	3.61704846715819	0.917413698546321	3.94265801010989	8.05835246864944e-05	0.00681220334633552	hervdb4
020951601-MALR1024cL	3.04868916945945	3.43933646281125	0.753965734687118	4.56166149810311	5.07504187869129e-06	0.000718539793040984	hervdb4
020951602-MALR1024cL	2.38580837503878	4.13258925792869	0.870052908387398	4.74981373901531	2.03604091615622e-06	0.000332805896714335	hervdb4
020952002-MALR1041uL	11.4094534019242	-1.27011226003388	0.317933990012604	-3.99489296499416	6.47234866252849e-05	0.00573759067228453	hervdb4
021012903ERVF3LU3p	21.7709740363326	3.07809366940752	0.46358751998423	6.63972505021755	3.14268825175773e-11	2.95548963990506e-08	hervdb4
021014501-MALR1003uL	3.95606692278573	2.07319392275647	0.489577324478575	4.23466083721203	2.28896909676586e-05	0.00247759842782186	hervdb4
021033201-HERV0897uL	2.09031736763132	4.58618451089718	1.15229073047151	3.98005849532483	6.88983126946532e-05	0.00601486603051536	hervdb4
021060302-MALR1044cL	1.50713459911272	3.22980916872969	0.761653580126077	4.24052253282267	2.2300004637078e-05	0.00242968527760088	hervdb4
021281101-MALR1043uL	26.8874594104267	1.10973289936949	0.231948115746617	4.78440144166454	1.7149762212582e-06	0.000285845844524986	hervdb4
021286001-MALR1006uL	6.38861641351257	2.27772705373412	0.464380529714754	4.9048719917978	9.3488287848559e-07	0.000170928902261364	hervdb4
021295702-HERV0739uL	2.35633740345903	4.98848233012422	1.29430969829909	3.85416437555849	0.000116125560851671	0.00903383999091815	hervdb4
021405802-HERV0746uL	9.25582070191789	-1.35263511037857	0.309314343301835	-4.37301127370818	1.22544393201173e-05	0.0014986333359799	hervdb4
021417501-MALR1043cL	12.3464395139138	4.3371130472813	0.700553805982155	6.19097778107251	5.97921382111765e-10	3.39037055588929e-07	hervdb4
021417502-MALR1043cL	10.1566737272714	6.8205721411561	0.983155478009812	6.9374298304912	3.99297538686531e-12	5.39160435311284e-09	hervdb4
021418002-MALR1003uL	2.35579952156485	4.32134846631525	0.966388625201008	4.47164665810964	7.76196007969089e-06	0.00102807457513524	hervdb4
021507601-HERV0421cL	1.77422117265211	3.48303783567976	0.829785510115593	4.19751585586805	2.69858768982266e-05	0.00283776939430988	hervdb4
021601501-HERV0739uL	9.00735404183759	5.79954053190776	0.979562563570064	5.92054121665394	3.20883860068865e-09	1.38844285687154e-06	hervdb4
021620602-HERV0116cI	2.62063241930091	2.79542520799032	0.607325861893255	4.60284236748287	4.16763665940182e-06	0.000611185368919194	hervdb4
021642202-MALR1127uL	4.83039136989201	-1.64513453388225	0.426618184991794	-3.85622224217634	0.000115152804393656	0.00897973103894507	hervdb4
021927801-HERV0421cL	324.511698868322	2.51778465338859	0.305046979828245	8.25376030540023	1.53487040651962e-16	9.8635320087118e-13	hervdb4
022330201-HERV1038uL	19.6511059277894	-1.66371012107487	0.350087734494462	-4.7522662382826	2.01149263743744e-06	0.000329569487744825	hervdb4
022330202-HERV1038uL	19.8250519746074	-1.60366243105091	0.33905704073089	-4.72977180357017	2.24772341980835e-06	0.000359946922538944	hervdb4
022330301-MALR1127cL	19.6959789883146	-1.69815769304797	0.325205557100872	-5.22179789357425	1.77194299516461e-07	4.17447154230836e-05	hervdb4
022330401-MALR1022uL	10.5504994973783	-1.54294218782519	0.361417204296572	-4.2691442728307	1.96224322297362e-05	0.00219374240733346	hervdb4
022330402-MALR1022uL	8.25297304425953	-1.72775808083316	0.334514533598213	-5.16497164487441	2.40475374514941e-07	5.42939261315386e-05	hervdb4
022330702ERVHpol	8.67692507658614	-1.47345386365463	0.351930784048692	-4.18677174728418	2.82950115949431e-05	0.00295395154141912	hervdb4
022330703ERVHgag	28.4013870766809	-1.73779212253654	0.34253017885544	-5.07339857861095	3.90772791403406e-07	8.23351390848877e-05	hervdb4
022330801ERVHenv	43.6781915524804	-1.47562411656065	0.318336717816265	-4.63541914574974	3.56214942580308e-06	0.000533615479817736	hervdb4
022331303-MALR1046cI	12.3496284165019	-1.51655139344339	0.368969090882775	-4.11023966754226	3.95248665255981e-05	0.00386908862671736	hervdb4
022524501-MALR1018uL	1.95029454870884	3.34543855167996	0.83926590446453	3.98614853038075	6.7154482528357e-05	0.00589973380430138	hervdb4
022590801-HERV0566uL	6.89509577063022	2.76886151446317	0.506136608813384	5.47058139294576	4.48561643324942e-08	1.31469477590052e-05	hervdb4
022591601-HERV0602uL	2.00633779871606	4.35216721507017	1.0960166076704	3.97089531728973	7.16030383017698e-05	0.00619797614155155	hervdb4
022666002-MALR1042uL	4.64291664244248	-1.30937506685508	0.33432283865247	-3.91649901075463	8.98441843088877e-05	0.00742326877115957	hervdb4
022805502-HERV0741cL	6.87437522031164	-1.51036925490525	0.361224205681656	-4.18125150847816	2.89908967455066e-05	0.00301029951784132	hervdb4
022805601-HERV0537uL	17.1489141864338	-1.45331687468365	0.372415038379709	-3.90241189240557	9.52389105459875e-05	0.0077636379463633	hervdb4
022805701-HERV0416uL	7.92429302981147	-1.89100404066519	0.453017784473205	-4.17423797801703	2.98985101883178e-05	0.0030851564096194	hervdb4
022906701MR525LU3	81.1328136301286	5.94531468238121	0.658717021820618	9.02559746512857	1.78717450196311e-19	2.04162125527108e-15	hervdb4
022958701-HERV0571uL	46.2140761433835	-1.77257589620333	0.335759086062973	-5.27930879544649	1.29672113424091e-07	3.21649869910137e-05	hervdb4
022958702-HERV0571uL	66.9498869927315	-1.60024586779014	0.334298503632648	-4.78687714842005	1.6939645306039e-06	0.000283159716478886	hervdb4
022960603-HERV0118cI	7.19990766099158	-1.05041753141294	0.258963451910824	-4.05623852965422	4.986933154645e-05	0.00467973375696298	hervdb4
022961901-HERV0540cL	49.3953336412526	-1.08926797568606	0.201924988430786	-5.39441890848211	6.8745664738472e-08	1.8873513115146e-05	hervdb4
022962601ERVHsLU3I	11.5235544821014	1.19008954017045	0.278860895770069	4.2676816944306	1.97514882978233e-05	0.00220379831731099	hervdb4
022980501-MALR0819cL	3.44196186373488	2.28450248685788	0.572786098440699	3.98840421071146	6.65192522587326e-05	0.00585099435399496	hervdb4
023182902-HERV0794cL	9.46575717220101	5.9779535702912	0.890427366950968	6.71357798756918	1.89909041977017e-11	1.92134798095815e-08	hervdb4
023188801-HERV0526uL	3.98788369613174	2.26955103419915	0.581228931852331	3.90474546228501	9.43246108406293e-05	0.00770177093033298	hervdb4
023218201-MALR1002cL	25.7050991614514	-1.33690868195971	0.315065638679372	-4.24327034697752	2.20285791667303e-05	0.00240464219642615	hervdb4
023219501-HERV0490uL	6.41916699510233	-1.72808465102587	0.361029879620851	-4.78654191403959	1.69679516227229e-06	0.000283496320275268	hervdb4
023219502-HERV0490uL	6.90397837018336	-1.77420396655126	0.351038852970652	-5.0541527000135	4.323056361948e-07	8.99392697076256e-05	hervdb4
023287301-MALR1014uL	6.58728303311274	-1.26034703486979	0.325454716636522	-3.87257265125884	0.000107692559587038	0.00852257058788913	hervdb4
023413702-MALR1127uL	4.86798297574822	5.93298010753129	1.09225583075635	5.43185940552308	5.57698558624121e-08	1.579857582153e-05	hervdb4
023433902-HERV0370uL	43.8045429455827	1.44674216270825	0.281833780384003	5.13331709469689	2.84679678742966e-07	6.28032689875296e-05	hervdb4
023470301-MALR1026cL	7.00421415900478	5.1976106942934	1.10427153418595	4.70682303526458	2.51607143931547e-06	0.000396265117651823	hervdb4
023470701-HERV0422uL	2.38175604245809	5.32556280540524	1.35276960656214	3.9367847855034	8.25806050008289e-05	0.00694213215779739	hervdb4
023471802-MALR1045cL	2.62984066663323	4.30922833120195	0.908735808512064	4.74200344130573	2.11615028569339e-06	0.000342672175520914	hervdb4
023591701-MALR1004uL	8.6032993385784	-1.13234418397963	0.246763902958273	-4.58877562886947	4.45853328542249e-06	0.000646282464790022	hervdb4
023591901-MALR1042uL	5.1844579875612	-1.24765792468433	0.294585514591722	-4.23529964266406	2.28247138384887e-05	0.00247355860011169	hervdb4
023600402-HERV0400cL	8.95499409940187	1.50915422056579	0.322897980244464	4.67378030492239	2.95705648707584e-06	0.000454857155206143	hervdb4
023602602-HERV0422uL	1.81032537733372	4.60364742581739	1.14474163718874	4.02156021608773	5.78139239484588e-05	0.00526300836531851	hervdb4
023608402-HERV0741uL	20.0740246471035	1.43315152567846	0.348282965457806	4.11490560210038	3.87337898085905e-05	0.00380992056104792	hervdb4
023613302-MALR1023uL	11.3450891107128	1.25600386844904	0.307630664013181	4.08283053471947	4.44904669295011e-05	0.00425553523535708	hervdb4
030056602PBLAsLU3p	7.22654286070756	2.08207955762258	0.424152197272283	4.9088029509511	9.16339912338722e-07	0.000167981128568295	hervdb4
030084701-MALR1018cL	7.98563010062579	7.33332254335193	1.86411824111235	3.93393636820807	8.35659148633599e-05	0.00701646353154686	hervdb4
030087601-MALR0818uL	2.79348677195304	4.59160740595303	0.961804294050627	4.77395186770848	1.80645573291097e-06	0.000299797354583819	hervdb4
030189201-MALR1004uL	12.3535014610808	1.31611161737326	0.298868798192881	4.40364342256926	1.06447853712168e-05	0.0013364520331113	hervdb4
030210801-HERV0118uI	6.15252869725943	4.4307550715662	0.699901178877125	6.33054380430479	2.44298648955312e-10	1.63661230039522e-07	hervdb4
030223502-MALR1022uL	13.3694836978843	6.2061061656697	1.01253509943534	6.12927509291349	8.82803714097444e-10	4.65476201551637e-07	hervdb4
030253101-HERV0499uL	11.0650964799614	1.00162477394177	0.258428177968953	3.87583421364406	0.000106260017774449	0.00842842316984898	hervdb4
030253702-MALR1014uL	5.10944152326283	5.36523859622985	1.12514551377899	4.76848419206669	1.85617234723062e-06	0.00030731341981678	hervdb4
030256401-MALR1022uL	3.94502553369603	5.28806372142849	0.885949112481421	5.96881203099505	2.38987243238199e-09	1.08979439091353e-06	hervdb4
030528101ERVPsLU5	10.1256215823974	6.89297103695908	1.27170784250678	5.42024732926999	5.95166367315085e-08	1.66694618874642e-05	hervdb4
030563602-MALR1018uL	20.5318793551834	2.83872583277353	0.393491877930153	7.21419168219127	5.42552860136634e-13	1.0232428995903e-09	hervdb4
030582601-HERV0912cL	3.46169448756536	2.70200724064198	0.595860221988388	4.53463268889701	5.77038168214434e-06	0.000801616433682037	hervdb4
030585601-MALR1022uL	3.51824738899855	2.64350772467943	0.609020688222603	4.34058772682152	1.42102120916199e-05	0.00168829819834253	hervdb4
030643601-MALR1002cL	3.54130233471069	3.35928245353703	0.713727425772796	4.70667418993986	2.51790843300752e-06	0.000396265117651823	hervdb4
030643602-MALR1002cL	4.96590609870643	5.06443413430894	0.817463615861195	6.19530219577244	5.81733079274258e-10	3.32574980510302e-07	hervdb4
030654202-MALR1015cL	3.30702070394625	2.02533271386082	0.489339650771802	4.13890987715058	3.48959986918726e-05	0.00349181357152643	hervdb4
030726502-MALR1007cL	4.26465216596439	4.91396939917255	1.12672042259382	4.36130321296575	1.2929004824219e-05	0.00156273885548606	hervdb4
030770402-HERV0911uL	2.65121304254482	2.28375832869143	0.582329162372343	3.92176534554385	8.79025760289557e-05	0.00729781233380668	hervdb4
030817001-HERV0527uL	5.11730065812057	-1.1400519598001	0.290448288140729	-3.92514608055708	8.66771218175311e-05	0.00722524497072295	hervdb4
030852901-MALR1002cL	6.7803173865754	6.75755729036432	1.51190475209196	4.46956548090359	7.83786617706584e-06	0.00103575640547044	hervdb4
031061601-MALR1131uL	8.24616585699786	6.88703574366309	1.17350094174585	5.8687943900727	4.38975406701651e-09	1.80841941891749e-06	hervdb4
031601002-HERV0419uL	37.0388441615674	2.20948516603983	0.336755458092894	6.56109682246143	5.34134233126417e-11	4.64549527768244e-08	hervdb4
031675001-HERV0817uI	9.61140342652208	-1.39672773444684	0.348240991277171	-4.01080794459134	6.05113191239851e-05	0.00544994496818202	hervdb4
031717302-MALR1003uL	11.5699194381265	-1.13890175076257	0.279909918655257	-4.06881526826232	4.72527919815755e-05	0.00446681118862608	hervdb4
031784901-HERV0912uL	18.7596057727947	1.74510419814655	0.312035621778197	5.59264416095101	2.2363732949283e-08	7.28506464174163e-06	hervdb4
031815305-MALR1046cL	2.21638908495529	3.00632676380632	0.767523495597882	3.91691821950606	8.96881571866353e-05	0.00741214201164711	hervdb4
031889901-MALR1134cL	6.14999598486631	5.95177945739314	1.04451150141537	5.6981464055955	1.21117022845452e-08	4.34194517229637e-06	hervdb4
031919301-HERV0421uL	4.08136859956153	6.00912934210329	1.49748615709411	4.01281127951397	5.99998809014645e-05	0.00540954205122494	hervdb4
031930002-MALR1014uL	3.76677403533524	5.29433128048254	0.979051549605706	5.40761238018032	6.38704670362246e-08	1.76749038842988e-05	hervdb4
031989102-HERV0537uL	12.835797079998	-1.32692519713355	0.282202601890894	-4.70203034359893	2.57587208029999e-06	0.000404287258844733	hervdb4
032011902-HERV0426uL	3.82366849872094	-1.29277249028275	0.336814708850318	-3.83823050571484	0.000123924123809848	0.00951940609548503	hervdb4
032012701-MALR1004uL	5.06795790181247	-1.16409637447434	0.282185047198117	-4.12529432736755	3.70260939455972e-05	0.00366898775585413	hervdb4
032015101-HERV0802cL	9.64375035192289	1.72573438290898	0.406417226597959	4.24621366902868	2.17413308997129e-05	0.00238303115881818	hervdb4
032018201-HERV0498uL	8.73425174219516	7.28447130467321	1.36870326879869	5.32216987475071	1.02536750849546e-07	2.63963674182563e-05	hervdb4
032046201-MALR1041uL	7.7075830821246	-1.33274940045701	0.320938429459444	-4.15266380751521	3.28627357344953e-05	0.00332761582366903	hervdb4
032202301-MALR1044uL	10.7758462303502	-1.42811714959994	0.319614498537729	-4.4682489565828	7.88624924343612e-06	0.00104056509979361	hervdb4
032202705-MALR1039cL	1.04357453253838	-2.39094748806805	0.604243154151201	-3.9569293779202	7.59193635558389e-05	0.00650346520393661	hervdb4
032283202-HERV0540uL	35.9068651785972	-1.20076132676927	0.279302783307786	-4.29913842085151	1.71463363329746e-05	0.00196387177899307	hervdb4
032667002-MALR1026uL	4.51013576846144	6.1238899012052	1.22217493376586	5.01064923851432	5.4246710866628e-07	0.000109573303870415	hervdb4
032683903-HERV0217cI	1.94506925233715	4.26995633509159	0.906218755472833	4.71183840469477	2.45492017302255e-06	0.000387582528863641	hervdb4
032792101RRHIsLU3	5.65949990452488	1.98755064978264	0.460343600017422	4.31753726935144	1.57779773431743e-05	0.00183487724451352	hervdb4
032835703-MALR1132cI	4.09948937905622	3.34788131060471	0.593364074405425	5.64220426381463	1.67886750396815e-08	5.71703818661551e-06	hervdb4
032893602-MALR1045cL	2.2533217540541	5.20679667695865	1.23243634864513	4.2247996683015	2.39153425173574e-05	0.00256224209952867	hervdb4
032966501PRM4pol	10.1342525343288	3.88126055014429	0.568678582657464	6.8250513884433	8.78938469985027e-12	1.02352089883961e-08	hervdb4
032966802-HERV0911uL	3.21097256588796	4.68347483828454	0.879400861750271	5.32575648034165	1.00533746674443e-07	2.59384541048068e-05	hervdb4
033005401-HERV0740cL	8.03409246873407	-1.33104274074234	0.333867471320699	-3.98673981468471	6.69874159291753e-05	0.00588686870967192	hervdb4
033005601-HERV0540uL	3.90794772060854	2.27807720537768	0.546955882760117	4.16501088512252	3.11337710100385e-05	0.00318985568819119	hervdb4
040007302-HERV0741uL	1.53602861593646	-2.43933519416756	0.571789218156863	-4.26614409070296	1.98880358972392e-05	0.00221274325651168	hervdb4
040014102-HERV0809uL	6.86434147568519	-1.1523060481662	0.274154587609411	-4.20312517187527	2.63254914990889e-05	0.00277673922796772	hervdb4
040028101-MALR1003cL	3.87473935758641	3.89866746084068	0.699794167181698	5.57116312721196	2.53044257416769e-08	8.04133866380652e-06	hervdb4
040028102-MALR1003cL	3.14196794463883	3.46064185348672	0.79546735830922	4.35045111196313	1.35857743603986e-05	0.00162626264868766	hervdb4
040118202-HERV0404uL	7.12512206498197	1.50627666955932	0.371844847930942	4.05082032987872	5.1038386859779e-05	0.00477137419398721	hervdb4
040142002-MALR1003uL	4.69816416782887	-1.18428038759715	0.273594285599609	-4.32860059559242	1.500597883847e-05	0.00176282152218208	hervdb4
040357601-HERV0590uL	2.70508121813041	2.83876451929944	0.664988360655391	4.26889354349246	1.96444990862136e-05	0.00219550211687531	hervdb4
040518004ERV9	4.32944599349914	-1.54376387595401	0.381453465017304	-4.04705689561367	5.18656379410867e-05	0.00483029913987791	hervdb4
040961001-MALR1022uL	2.82138518071565	3.92911845482576	0.882482684818153	4.45234623004009	8.49370634327775e-06	0.00110724491932541	hervdb4
041002401XA34sLU3	43.0769987470423	1.068396924092	0.232197355600947	4.60124501128315	4.19973062993107e-06	0.000614932710210414	hervdb4
041009701-MALR1132cI	11.6440389188543	5.04953355747946	0.72041567848146	7.00919442525627	2.39694178990731e-12	3.53951804227078e-09	hervdb4
041011501-MALR0819cL	4.37311708606152	5.93474795913544	1.26757685729088	4.68196301076325	2.84140760486448e-06	0.000439797175307793	hervdb4
041011502-MALR0819cL	5.85647683263111	6.72305046919554	1.72570997519994	3.89581712211902	9.78682157956342e-05	0.00791844911294031	hervdb4
041046502-HERV0517cL	5.65008074806829	4.01273117576724	0.760393195201037	5.27717922923591	1.31187563774576e-07	3.24712613274275e-05	hervdb4
041308501-MALR0819uL	2.68210903815413	3.92220116220713	0.98775885709196	3.97080839523363	7.16291698547089e-05	0.00619869190099279	hervdb4
041373202-MALR1004uL	2.10051818145014	4.01642485175077	0.868580614832947	4.62412444298362	3.7618398367567e-06	0.000559791449464541	hervdb4
041405801-HERV0617cL	5.3628209219744	1.46167632143779	0.370698059291231	3.94303742574884	8.04560940451586e-05	0.00680660027998767	hervdb4
041440101-MALR1018uL	3.27441029849402	-1.87116752911498	0.483392985664087	-3.87090335318865	0.000108432778870704	0.00856552308757382	hervdb4
041440202-HERV0415uL	3.52563173037922	-1.91549457057914	0.480155482258987	-3.98932146222161	6.62625715857855e-05	0.00583911569113745	hervdb4
041455901-HERV0949uL	30.6419120187895	2.65868588432927	0.430704975921384	6.17287013840897	6.70612924605346e-10	3.7175095382835e-07	hervdb4
041465201ERVLsLU3	27.2873589457424	2.05739386941426	0.365241990738889	5.63296094529582	1.77141584639502e-08	5.97973469859923e-06	hervdb4
041467101-HERV0489uL	10.3097633263565	1.60156866838043	0.33500348576923	4.78075225009355	1.74640475989792e-06	0.000290760308506094	hervdb4
041467102-HERV0489uL	9.67998912094188	1.93194120089822	0.39454364650813	4.89664760286137	9.74854301754884e-07	0.000177210026084327	hervdb4
041520601-HERV0489uL	4.59753482297081	1.99763374299508	0.515062526082806	3.87842959220435	0.00010513294438191	0.00836004453698677	hervdb4
041581204-HERV0116cL	4.81978998948712	1.57513864558513	0.397399705767182	3.96361301411716	7.38238902192749e-05	0.00634432055074115	hervdb4
041770201-HERV1036cL	4.95560092867543	6.24905353701786	1.08247901687061	5.77290962653814	7.79142356973908e-09	2.9549506089299e-06	hervdb4
041873802-MALR0819uL	2.41675698274749	5.00337183935924	1.145079445081	4.36945389322337	1.24557634224864e-05	0.00151876283305385	hervdb4
042442302-HERV0118cI	16.5027726039292	2.96706030884735	0.439480704892142	6.75128686155979	1.46539538669156e-11	1.5694611610113e-08	hervdb4
042469001-MALR1002uL	4.19146297061054	3.11633853842864	0.69184620863324	4.50438045268044	6.65668578191932e-06	0.000903050469132777	hervdb4
042577301-HERV0886uL	9.04183634951909	6.85791787799065	1.12360934791049	6.10347171883532	1.03788940116495e-09	5.30439440342065e-07	hervdb4
042577303-HERV0886uL	6.75069143255218	6.2497808313861	1.04674798947521	5.97066428044392	2.36289519553574e-09	1.08033187187722e-06	hervdb4
042614002-HERV0750cL	12.9936850057451	7.88367382017366	1.96280426776185	4.01653590715048	5.9059868755152e-05	0.00534697512533599	hervdb4
042634701-MALR1126cL	26.7946759723411	1.02806328309376	0.243474173404394	4.2224736559069	2.41635649021984e-05	0.00258564301337061	hervdb4
042634702-MALR1126cL	14.0118584140631	1.2027133368004	0.268777100800197	4.47476118024827	7.64967668657298e-06	0.00101591687859723	hervdb4
042653201-HERV0415uL	3.3972344964861	5.4948674620687	1.07604847944356	5.10652407121114	3.281388270674e-07	7.11692098555807e-05	hervdb4
042653901-MALR1001cL	12.3958828164217	6.38751997391079	0.988403152526135	6.46246418537389	1.0301153148171e-10	7.78803086160847e-08	hervdb4
042695702-MALR1022uL	22.2703407810053	3.83353808224556	0.596426240837324	6.42751411618585	1.29707554388055e-10	9.47602432078796e-08	hervdb4
042695801-HERV0600uL	11.68166034873	3.9186103336789	0.710973085178294	5.5116155806323	3.55554822791129e-08	1.0743030099605e-05	hervdb4
042986905-HERV0468cI	2.47561847282555	2.54580904933567	0.631133520205788	4.03370914050894	5.49032704501508e-05	0.00504168640159072	hervdb4
050003502-HERV1032uL	40.9501795140869	-1.12093740753483	0.20604149593256	-5.44034784091128	5.3176641133129e-08	1.52129909365362e-05	hervdb4
050022902-HERV0566uL	56.2739382775994	-1.32470066084974	0.314659614623069	-4.20994814487584	2.5542930745385e-05	0.00270901828461598	hervdb4
050288601-HERV0817uI	12.9991580770804	-1.11667862269756	0.2400848060433	-4.65118405908685	3.30034597984869e-06	0.000500124917872092	hervdb4
050290201-HERV0590uL	3.36451694276373	-1.88508251573156	0.432593108089748	-4.35763418436261	1.31475893047349e-05	0.00158224791957842	hervdb4
050371602-HERV0909uL	3.28120484937264	3.63313050199898	0.757950162982683	4.79336330993307	1.6400821961352e-06	0.000276148143475419	hervdb4
050699401-MALR1046cL	5.9448038968741	3.55254374742108	0.642876348310733	5.52601407215554	3.2758786757608e-08	1.00005212498237e-05	hervdb4
050755202-MALR1014uL	6.96682152015143	-1.90594228095327	0.463285109962117	-4.11397267032632	3.88907499464338e-05	0.00381670476425664	hervdb4
050849301-HERV0469uL	9.56102106497944	1.88065074976677	0.339926085415887	5.53252848326091	3.15647164695589e-08	9.69344062766931e-06	hervdb4
050852402-HERV0513uL	6.04955752118873	3.14889790720169	0.626932717343701	5.02270470193914	5.09488484885569e-07	0.000103588626442359	hervdb4
050857802-HERV1038uL	21.7754253081601	1.57595264563039	0.302302748204406	5.21316016804712	1.85650469093674e-07	4.33963000721531e-05	hervdb4
050900901-HERV0751uL	118.784198899651	-1.17295707889634	0.277533354624651	-4.22636436071873	2.37497320397942e-05	0.00254843290428243	hervdb4
050900902-HERV0751uL	132.19817378778	-1.18610615654763	0.286029388543239	-4.14679821045145	3.37156960409624e-05	0.00339567794050331	hervdb4
050901201-HERV0899uL	16.5769179263519	-1.82415663081326	0.326177496413901	-5.59252753751751	2.23787646478491e-08	7.28506464174163e-06	hervdb4
050907202-HERV0907cL	8.91292408470527	-1.0633441245759	0.259390713998186	-4.09939164045532	4.14237557403212e-05	0.00401534730528169	hervdb4
050951701-HERV0463cI	3.74148875438246	-1.64626750335088	0.387196665022633	-4.25176054461794	2.12096570890043e-05	0.00233434037520656	hervdb4
051187502-MALR1127cL	4.75365910957502	-1.81617081040907	0.361280974096118	-5.0270314260332	4.98130746753101e-07	0.000101802904439494	hervdb4
051204802-MALR1007cL	2.28976091368852	3.51585063073824	0.796359145610448	4.41490582498826	1.0105397312053e-05	0.00128218463445288	hervdb4
051316902-HERV0540cL	5.10916084805248	2.70972465340878	0.593537459915392	4.56538101873983	4.9858792229153e-06	0.000707909507777409	hervdb4
051366502-MALR1003cL	18.3535599304438	1.89975505085872	0.36098930557035	5.26263526798163	1.42005113804826e-07	3.47620479003814e-05	hervdb4
051378004-HERV0172cI	2.59962236138103	2.06809809558669	0.528968888143294	3.90967813408803	9.24191818776048e-05	0.00758186867498024	hervdb4
051394303HE41sLU3p	39.8761549641318	1.98962335389637	0.278989530299156	7.13153411801128	9.92563427684697e-13	1.66284442743828e-09	hervdb4
051845202-HERV0426uL	1.76597635912747	4.26525751198116	1.07180570555179	3.97950625741939	6.90585425170823e-05	0.00602047376733753	hervdb4
052171101-MALR1015uL	6.50037748537285	5.08633867749283	0.89291219131788	5.69634811457297	1.22400832753831e-08	4.37892133837469e-06	hervdb4
052173904-HERV0940cI	2.94944307461007	3.39275073643186	0.809158933670687	4.19293490469284	2.75368480110492e-05	0.00288957877133181	hervdb4
052182602-HERV0797uL	6.92031034998619	-1.70324679881851	0.348168717064124	-4.89201561007795	9.98085264062782e-07	0.000180864516101862	hervdb4
052190202-HERV0402uL	15.4862956731762	1.64031922000918	0.389187915148105	4.21472290419131	2.50085046818777e-05	0.00266172008272932	hervdb4
052190301-HERV0933cL	9.20665952958141	3.03659609806217	0.518262493544361	5.8591855206328	4.65142831314446e-09	1.8945289357129e-06	hervdb4
052276701-MALR1018uL	4.19687755614596	-1.55451989691694	0.344763819369945	-4.50894151177993	6.51518656342841e-06	0.000885585601739494	hervdb4
052385902-HERV0795uL	5.55067628513814	-1.28812627102571	0.266940919994082	-4.82551071995357	1.39644953024449e-06	0.000242055902090631	hervdb4
052396202-HERV0740uL	2.20869868935533	-2.13562965536023	0.53530767654155	-3.98953676352606	6.62024583471007e-05	0.00583678279868163	hervdb4
052404301-HERV0515uL	4.097174238658	-1.51270310709611	0.377267228715184	-4.00963293909135	6.0813207974591e-05	0.00546578591850364	hervdb4
052491201-HERV0590uL	3.18928455771494	3.08370570570426	0.657880653084048	4.68733301587195	2.76788376334451e-06	0.00042956664738632	hervdb4
052493402-MALR1004cL	2.62388989065232	5.51736374884176	1.42159501215969	3.88110798198409	0.00010398165675498	0.00830083149922084	hervdb4
052676801-HERV0548uL	5.65353840713576	-1.59182154778865	0.406543777756305	-3.91549848966778	9.02176094834042e-05	0.00743995124594366	hervdb4
052679101-HERV0116cL	2.12033026963517	4.85143614024205	1.14659378612592	4.23117253812611	2.32476255324511e-05	0.00250851710580571	hervdb4
052679102-HERV0116cL	3.02469238130802	4.71507155849357	1.08795259613814	4.33389430314378	1.46494530521775e-05	0.00172678437437725	hervdb4
052681401-HERV0889cL	43.3971385951979	1.4107953603943	0.32371684480231	4.35811538091525	1.3118722173819e-05	0.00158016625087077	hervdb4
052681402-HERV0889cL	23.2733277183188	1.82548103015396	0.364572805812211	5.0071782674165	5.52337674845723e-07	0.000110985651375196	hervdb4
052681501-HERV0378uL	4.51165308141784	5.81005780118467	1.17717968450517	4.93557430327806	7.9915247686144e-07	0.000149981809056308	hervdb4
052704001-HERV0479cL	12.2742356973326	7.6475309094493	1.61539516897863	4.73415487201477	2.19969721235025e-06	0.000353397651217493	hervdb4
052716203-HERV0187cL	127.121058232314	1.17890058005968	0.211016540028809	5.58676860069229	2.31333635770305e-08	7.4614932804105e-06	hervdb4
052720701-MALR1126cL	2.67861555877919	3.46113052617314	0.789234299328897	4.38542841981933	1.15757720237795e-05	0.00143260499561054	hervdb4
052783704-HERV0700cI	5.92892014053337	4.22656038155706	0.703477284008064	6.00809788409403	1.87712506797391e-09	8.83853380038407e-07	hervdb4
052795201-HERV0926uL	19.6430992387359	-1.08814441353106	0.217044798446064	-5.01345538488668	5.3461167816579e-07	0.000108175477875856	hervdb4
052799301-HERV0700cI	5.27652572107689	4.28297228720302	0.72936541050251	5.87219002372513	4.30075360405562e-09	1.78558280822125e-06	hervdb4
052828901-HERV0540cL	11.6432901765507	-1.66843346481958	0.356600845030354	-4.67871427696017	2.88679383733545e-06	0.000445629536224265	hervdb4
052843301-MALR1126cL	3.82999573751066	-1.59773149399427	0.406723518977299	-3.92829875688464	8.55488950804369e-05	0.00715526092331001	hervdb4
052843302-MALR1126cL	10.532275399799	-1.18577874642029	0.288252613505308	-4.11367908169358	3.89402692167747e-05	0.00381940424635533	hervdb4
052843901-MALR1018uL	29.3420011586178	1.71245923455978	0.294389470403062	5.81698534331127	5.99183933461673e-09	2.35479964427939e-06	hervdb4
052844201-MALR1001cL	6.86347372900286	-1.21266638249612	0.27974759001154	-4.33485908652903	1.4585352206643e-05	0.00172215342727092	hervdb4
052844302-HERV1033cL	14.7881211154787	1.39864391227748	0.312302200610702	4.47849521886958	7.51710538356988e-06	0.00100099229094644	hervdb4
060035902-HERV0402cL	32.5767788103016	2.75467389862692	0.424590688436884	6.48783398611062	8.70791521886112e-11	6.79060840280716e-08	hervdb4
060039002-HERV0577uL	11.0531926264235	2.01643884565455	0.375490285971967	5.37014916493762	7.86715423479579e-08	2.12125863446685e-05	hervdb4
060039101-HERV0569cL	17.0120203461708	2.59206659676864	0.388643452347742	6.66952339248307	2.56635475055865e-11	2.50161917286197e-08	hervdb4
060039201ERVTsLU3	8.5456599316785	3.06136733393761	0.47064359453864	6.50464038916452	7.78794558797197e-11	6.23863581417613e-08	hervdb4
060057702-HERV0797cL	10.3783666158364	3.99220806352846	0.566331194237161	7.04924627877138	1.79889518461876e-12	2.76217967684249e-09	hervdb4
060168002-MALR1020uL	6.29553314165179	4.59937814042531	0.822069066665167	5.59488043879732	2.20773856892546e-08	7.2276362093256e-06	hervdb4
060259501HK01gag	3.45551640483926	5.582654695771	1.36473901728165	4.09063903433404	4.30186229083586e-05	0.00413985649519096	hervdb4
060278501-MALR1026uL	17.5308618959217	3.03059259458608	0.41547913830254	7.29421122554482	3.00413818614955e-13	6.20533353189057e-10	hervdb4
060371302-MALR1126cL	2.20750754680726	2.46434674306926	0.625089844703717	3.94238806461065	8.06743047870222e-05	0.00681655642736607	hervdb4
060392901-MALR1002uL	4.16448426577034	2.51550441094149	0.574795527700274	4.37634652622627	1.2068509690401e-05	0.00148195832723388	hervdb4
060392902-MALR1002uL	2.89466533312342	2.18698460685712	0.497341305468144	4.39735164325137	1.09579735244644e-05	0.00136638015539333	hervdb4
060394901-HERV0749uL	1.04290768069873	3.6261988253615	0.884401975993477	4.10017042452679	4.12845997008997e-05	0.00400519479681471	hervdb4
060394902-HERV0749uL	3.37638474926766	3.49209615966187	0.716274142633253	4.87536259067486	1.08608775833585e-06	0.000195079800154093	hervdb4
060395901-MALR1017uL	4.2054604962054	3.57508555776815	0.757219163205228	4.72133529034738	2.34301327929683e-06	0.000372627162319701	hervdb4
060407301-MALR1046cL	5.0435757970557	3.16215218605647	0.607342116604945	5.20654191369596	1.9239225340344e-07	4.46581670742887e-05	hervdb4
060414401-HERV0537uL	10.867949050165	2.98929283620637	0.424931256112528	7.03476807885075	1.99592708025246e-12	3.0114200669096e-09	hervdb4
060414402-HERV0537uL	41.9542409050946	2.41069129807014	0.316557726872564	7.61532919093966	2.63020255419583e-14	8.3538239964985e-11	hervdb4
060497901-MALR1024uL	54.2039284745399	5.12864442077086	0.740167584177389	6.92903138479207	4.23731800576434e-12	5.66891613670762e-09	hervdb4
060510905-MALR1016cL	2.19756850029853	5.16314372435042	1.29669589997314	3.98176914452907	6.84042034948841e-05	0.00598372956328568	hervdb4
060512702-MALR1023uL	40.4917550740519	-1.10674749159319	0.277451457294903	-3.98897703542004	6.6358844761031e-05	0.00584463104288654	hervdb4
060528701-HERV0378uL	42.0888391504427	-1.14981011657331	0.223188141358536	-5.1517527301158	2.58063151311337e-07	5.7811421442441e-05	hervdb4
060529902-HERV1034uL	9.00688670079774	1.94763222059038	0.443895364391077	4.38759306095049	1.14611959368011e-05	0.00142045150499597	hervdb4
060541601-HERV0399cL	1.57874820671117	-2.33956988218572	0.578173913139894	-4.0464812213339	5.19932935709444e-05	0.00483459612405925	hervdb4
060542601-HERV0462uL	2.5376131917837	5.09437291469424	1.29164363674161	3.94410096545334	8.0099907862314e-05	0.00678486880253867	hervdb4
060559402-MALR1014cL	2.60593857211148	4.54497724461065	0.943516851823241	4.81705995587465	1.45688922595223e-06	0.000250903076521063	hervdb4
060559501-MALR1002cL	3.21011706709924	5.13334119553006	0.90212787154834	5.69025895045189	1.26846860652411e-08	4.51934266772069e-06	hervdb4
060559502-MALR1002cL	5.11664888886939	6.00613954076503	1.20550443018879	4.98226252044917	6.28450946226409e-07	0.000123392737780323	hervdb4
060559802-HERV0908cL	1.62646504565829	3.14905162592775	0.810523905443498	3.88520511829281	0.000102243527062774	0.00820531264131389	hervdb4
060615402-HERV0514uL	9.75764284237694	1.80699597046498	0.397836537628132	4.54205634615195	5.57081457601373e-06	0.000776691070376973	hervdb4
060615802-MALR1020uL	10.360831359281	2.81716299906457	0.43761769637782	6.4374978945832	1.21459007653348e-10	8.98693066862792e-08	hervdb4
060618101-HERV0811cL	27.9681582732376	1.77153705259816	0.431265184933076	4.10776736562462	3.99502189112382e-05	0.0038986290682165	hervdb4
060625501-HERV0590uL	6.99501198287751	-1.04866942464316	0.264737030827732	-3.96117392933045	7.45821793246619e-05	0.00640156019521251	hervdb4
060631701-HERV0540uL	10.5713513599793	-1.0087785545709	0.225309030654976	-4.47731079237421	7.55891688026817e-06	0.00100578808887679	hervdb4
061115301-MALR0819uL	10.4553530219811	-1.03739805947257	0.227628447839402	-4.55741832499108	5.17862178053682e-06	0.000730549715189452	hervdb4
061238401-MALR1045cL	3.77672061766387	3.62835593828103	0.740503954366971	4.89984680957278	9.59114084580786e-07	0.000174753879426066	hervdb4
061259101-HERV0198cI	7.04049792558131	6.14737579093308	0.966150391363293	6.3627524719612	1.98169917618443e-10	1.35906966031526e-07	hervdb4
061275202-MALR1015cL	1.66988987154456	3.13127088284368	0.712914569535376	4.3922105349655	1.12203965071854e-05	0.00139509208023055	hervdb4
061376601-MALR1006cL	1.38222548734463	3.2711790110463	0.752019056071536	4.34986186139295	1.36223318093027e-05	0.00163007640843594	hervdb4
061523002-MALR1041uL	3.53614017108054	5.79850541608985	1.38617209696357	4.18310643302627	2.87552685504241e-05	0.00299299738823281	hervdb4
061528901-MALR1003cL	4.7177398400211	3.75426909750309	0.725549370635511	5.17438130256348	2.28667421782446e-07	5.20342089881604e-05	hervdb4
061579302-MALR1133uL	2.90262657521561	3.12191486299407	0.728433239099474	4.28579407888296	1.82087596323544e-05	0.00206227277011085	hervdb4
061681701-HERV0763cL	1.57817609635796	4.04247740856435	0.971797445478117	4.15979423219772	3.18534434619851e-05	0.0032501564099318	hervdb4
061681801MR41sLU3	4.17535910556472	4.77389216605668	0.92000056700244	5.18901002595145	2.11415014952592e-07	4.85219831275453e-05	hervdb4
061744203ERVLsLU5	4.34400481556512	-1.69910261794979	0.438524074092165	-3.8745937072378	0.000106802740292529	0.00846373302953033	hervdb4
061876201-HERV0183cL	6.5682588933201	2.65387469521335	0.507359562732694	5.23075721864646	1.68817100915357e-07	4.01197461539524e-05	hervdb4
061953301-MALR1017uL	1.45040802868478	4.10319122732047	1.05779532004955	3.87900300705458	0.000104885458508339	0.0083480164705422	hervdb4
061961801ERVLsLU3	24.3129729745341	-1.11038571680881	0.288771508075133	-3.84520524275515	0.000120451576816113	0.00930474424288989	hervdb4
061961802ERVLsLR	2.93460974850964	-2.00369384940983	0.476535238197118	-4.20471287074263	2.61413804501543e-05	0.00275899691113521	hervdb4
061975402-HERV0802uL	12.2098724876601	1.75787678988443	0.423319268547587	4.15260282366954	3.28714974455001e-05	0.00332761582366903	hervdb4
062082901-HERV1054uL	10.1346765922748	-1.15544414057077	0.248807248581962	-4.6439327919747	3.41838802839374e-06	0.000515088586023967	hervdb4
062149605ERVHpol	2.8107276431353	3.51333306984709	0.714443065454545	4.91758299538092	8.7619312578306e-07	0.000162163487204927	hervdb4
062164501-HERV0803cL	4.95091900410489	2.62805957332248	0.654152596792041	4.01750231705945	5.88182571927648e-05	0.00533006094980874	hervdb4
062164502-HERV0803cL	3.0896737779277	2.71130750691653	0.668544414711618	4.05553834158659	5.00189663537868e-05	0.004691238298403	hervdb4
062258101-HERV0501uI	2.70423828685311	5.62535644261655	1.1384864059045	4.94108354165841	7.76896092677376e-07	0.000146680349336726	hervdb4
062267602-HERV1036cL	2.49313724698679	3.96707762493935	0.875864430161763	4.52932838499524	5.91714729813647e-06	0.000819380868076344	hervdb4
062290001-MALR1024uL	27.2292225000514	-1.01621984985867	0.244001444205838	-4.16481079924018	3.11610869244556e-05	0.00319171203793523	hervdb4
062290202-HERV0572uL	3.50935441375333	-2.38659940901333	0.533408466962726	-4.4742435803519	7.66822874790648e-06	0.00101760181265717	hervdb4
062313902-MALR1001uL	3.91130845660026	-1.89292533593255	0.489461225761899	-3.86736525040571	0.00011001758444989	0.00866113932754104	hervdb4
062427002-MALR1003uL	9.39140551492574	-1.01458080756513	0.237694160080418	-4.26842967964326	1.96853863732539e-05	0.0021993634189461	hervdb4
062429601-HERV0617uL	5.48550042902974	2.36686340192519	0.472484985053207	5.00939389991124	5.46017181306221e-07	0.00011009813030615	hervdb4
062478601-HERV0520uL	4.68711766703737	-1.08517581804011	0.277459006017225	-3.91112126298304	9.1868630024518e-05	0.00754729803302597	hervdb4
070022801-HERV0590uL	2.95238615624342	3.60229533535493	0.809823957027898	4.44824496002263	8.65747644562129e-06	0.00112524558516913	hervdb4
070025101-MALR1014uL	40.3334852735061	-1.92381559243796	0.358993256326745	-5.35891847140148	8.37216227564957e-08	2.22970664074898e-05	hervdb4
070025102-MALR1014uL	10.1186344928518	-1.62812314504342	0.406773428743292	-4.00253072102922	6.26685273998416e-05	0.00558767532844117	hervdb4
070025202-HERV0558uL	9.61448350589614	-1.71898770896485	0.380064771372944	-4.52288093620251	6.10035596743513e-06	0.000839391565352632	hervdb4
070028801-MALR1019uL	5.95490400985224	2.01245202485412	0.437410968156538	4.60082661698121	4.20817603982513e-06	0.000615390328419771	hervdb4
070029302-HERV1030cL	14.2116355756723	4.15933265247549	0.599148531750969	6.94207267823913	3.86388326130002e-12	5.23767488022005e-09	hervdb4
070066202-HERV1052cI	8.25125937781449	1.8253579177708	0.456322425923533	4.00014948657526	6.33024839821799e-05	0.00563840554196511	hervdb4
070068202-HERV0473cL	41.382989090112	-1.11852040936642	0.232811597830111	-4.80440158390493	1.5521502341282e-06	0.000263258638439475	hervdb4
070073501-MALR1026cL	5.44094572084306	2.58995339153961	0.561242671729948	4.61467654188955	3.93707993182911e-06	0.000581876268289327	hervdb4
070077302-HERV0949cL	13.7250590682252	-1.07552624692381	0.248110470604195	-4.33486843301978	1.45847325297204e-05	0.00172215342727092	hervdb4
070259402-MALR1127uL	6.06734084989557	6.71827166387867	1.15566441484185	5.81334129319716	6.12380293951089e-09	2.40393902270257e-06	hervdb4
070314803-HERV0700cI	5.54154219321511	-2.12142752151981	0.486489148214524	-4.36068826880459	1.29653969982749e-05	0.00156659194510493	hervdb4
070419801-MALR1002uL	3.62861139264222	-1.67249935184581	0.385120343532387	-4.34279668662883	1.40680313673053e-05	0.0016741729235536	hervdb4
070422002-MALR1025uL	6.97105528023616	2.88000320899083	0.506366680194243	5.6875843566288	1.28848960159577e-08	4.58126702403447e-06	hervdb4
070518401-HERV0588uL	7.12578400689836	5.86481362915868	0.945091764855958	6.20554939451042	5.45061477462211e-10	3.14652619024882e-07	hervdb4
070526402-HERV0925uL	17.5928367948682	6.22289691078422	0.886372223822206	7.02063618820308	2.2086026236338e-12	3.28939606203177e-09	hervdb4
070527101-HERV1034cL	5.49533827465713	6.12067697387029	1.25214836354008	4.88814037704435	1.01792938819045e-06	0.000183980133484298	hervdb4
070632101-MALR1043uL	3.47652887250373	3.68972055396055	0.694277239600979	5.31447719081378	1.0696397869601e-07	2.73132007999187e-05	hervdb4
070632202-HERV1036cL	1.54931229017307	4.63015266499656	0.976800985487655	4.74011874863642	2.1359300022917e-06	0.00034474903692803	hervdb4
070684202-HERV0540cL	2.73403550600708	-3.29302754122396	0.707361669507692	-4.65536610644429	3.23405520911978e-06	0.000491797475314963	hervdb4
070870403-HERV0884uL	2.85129620053291	3.22969365053285	0.784103821874651	4.11896175025806	3.80583307913727e-05	0.00375305539960845	hervdb4
070896702-HERV0740uL	13.5077559866293	3.75844766337989	0.513590573871824	7.31798411922934	2.51723644098821e-13	5.35908828068546e-10	hervdb4
070905304-HERV0901cI	2.20267409232128	3.10226100922729	0.791603987927282	3.91895576139046	8.89334342732305e-05	0.00737083361869989	hervdb4
071036302-MALR1017cL	4.57895157979699	6.02534981011427	1.38829362983749	4.34011197675781	1.42410128193315e-05	0.00169070005766829	hervdb4
071052301-HERV1038cL	4.67900934883527	5.52376043145237	0.972122366261288	5.68216576756315	1.32999655355378e-08	4.69995319770094e-06	hervdb4
071071807ERVH3LU3I	4.0169229088114	-1.18073338879207	0.289877771951874	-4.07321120499054	4.63693390623226e-05	0.0044073097894843	hervdb4
071077802-MALR1026uL	13.1680139762806	-1.10603057732588	0.284595600201237	-3.88632352904898	0.000101773849482207	0.0081734693930376	hervdb4
071212203-HERV0882cI	12.239446029897	2.56181570828591	0.378341953780701	6.77116476955877	1.27749679483764e-11	1.41634804391233e-08	hervdb4
071360903HFRDsLU3	7.38014018619305	-1.02651491210065	0.250417199349767	-4.09921888259312	4.14546850140721e-05	0.00401608174025218	hervdb4
071378201-MALR1003uL	1.61094675905129	4.27868102602013	1.01508833028821	4.21508246952784	2.49686931112139e-05	0.00265949536017601	hervdb4
071388802-MALR1041uL	3.99385071239326	-1.28611572014384	0.321215444015668	-4.00390374779459	6.23057229826963e-05	0.00556104217835784	hervdb4
071391202-MALR1126uL	4.64258851552222	-1.45816145947379	0.339202208093596	-4.29879707348909	1.7172761128202e-05	0.00196546555630233	hervdb4
071404402-MALR1023uL	2.15499940666242	4.57075304939226	0.959862739085725	4.76188194756464	1.91795875817982e-06	0.000316185296087203	hervdb4
071406801-HERV0495uL	7.01229912631232	1.61287128710112	0.421156160274738	3.82962767551346	0.000128337285088024	0.00977277951271961	hervdb4
071437501-HERV0541uL	3.57706874227399	4.32292355977764	0.826447834075087	5.2307276775861	1.68844082837712e-07	4.01197461539524e-05	hervdb4
071437502-HERV0541uL	2.68487686355852	2.51973844262026	0.596390253281997	4.22498259948729	2.38959241099545e-05	0.0025615696389106	hervdb4
071527502ERVLsLR	3.39983388223143	5.59327138632535	1.3774059449244	4.06072836184276	4.89198618759833e-05	0.00460308309875372	hervdb4
071605303-MALR1046cI	23.9206638923131	-1.12686853510821	0.247447361929898	-4.55397271694274	5.26421863435416e-06	0.000740490129912275	hervdb4
071798202-MALR1004uL	63.9536224958782	-1.10096892732116	0.226723773201383	-4.85599243420866	1.19785275097135e-06	0.000212950236496966	hervdb4
071802002-MALR0819cL	2.70102058237129	5.16950918460225	1.17078569799266	4.41541880248921	1.00814617097371e-05	0.00128046043806772	hervdb4
071898802-MALR1042uL	3.53816035508596	5.78664493397817	1.50780264784779	3.83779995494631	0.000124141547692486	0.00953299399872684	hervdb4
071937601-HERV0519uL	5.71952841912355	5.39883114722941	1.09285869210271	4.9400999289687	7.80825441562433e-07	0.000147102087258955	hervdb4
071951101-MALR0820uL	1.67589043568214	-2.24788926854851	0.579449064509492	-3.87935610949922	0.000104733333104959	0.008337820888755	hervdb4
072097106-HERV0468cL	3.74979619741315	5.30677479986289	1.06754858066227	4.97099138717486	6.66114088830969e-07	0.0001294260420527	hervdb4
072097702-HERV0918uL	24.630913706927	1.49906973773258	0.251931170975219	5.95031465113953	2.67627488270112e-09	1.19834956102573e-06	hervdb4
072098002-HERV0558cL	13.0651232435867	-1.08388350923348	0.249655942622363	-4.34150894967076	1.41507513558759e-05	0.00168228630884415	hervdb4
072116602-HERV0902uL	26.2507245690845	1.23160536635259	0.270242359684141	4.55741049549778	5.17881476389272e-06	0.000730549715189452	hervdb4
072125601-MALR1022uL	6.99300744788543	-1.09951208920573	0.284037730851588	-3.87100715777875	0.000108386609028075	0.00856382537908073	hervdb4
072130301-MALR1127cL	2.57361490714394	4.51743119546873	0.851677231168632	5.30415870020397	1.13193807088685e-07	2.86301129270521e-05	hervdb4
072140201-HERV0396cL	8.06512858387897	-1.32743952801233	0.306643784532101	-4.32893016252664	1.49835434708516e-05	0.00176123066578863	hervdb4
072242102-MALR1022uL	4.83730206739468	-1.43274046394888	0.343116399651148	-4.17566885583309	2.97111766409916e-05	0.00306947678414912	hervdb4
080090603-HERV0501uI	3.54370645986884	4.67719189306233	0.880244186102176	5.31351637069422	1.07529770725207e-07	2.74374860566627e-05	hervdb4
080302201-MALR1018cL	1.70797329745334	4.52280871061942	1.15567080164871	3.91357876669294	9.0938217959446e-05	0.00748869966689297	hervdb4
080348301-HERV0553cI	13.831129985471	3.07837600113229	0.466012649661692	6.60577776883756	3.95435709455051e-11	3.58287467089012e-08	hervdb4
080461202-HERV0585uL	14.1036778737322	-1.16545170399497	0.274919038493928	-4.23925425601513	2.24263542384944e-05	0.00243988406578868	hervdb4
080656701-HERV0740uL	5.74459141970726	-1.2058175043833	0.303423189422405	-3.97404531498958	7.06621101040468e-05	0.00612722774820248	hervdb4
080740202-MALR0819uL	48.3240622033625	7.66561072022873	0.938068189506776	8.17169882315187	3.04076866242672e-16	1.7586792353922e-12	hervdb4
080887801-MALR1022uL	4.09289639406017	-1.74731032623039	0.44826639666578	-3.89792841762608	9.70190835918783e-05	0.00786625289440505	hervdb4
081250203-HERV0927uL	2.27235900272567	4.49718311963446	1.146148302893	3.9237357925524	8.71863498966145e-05	0.00725897484192015	hervdb4
081435801ERVH5LU3I	4.34632213568835	-1.26415447964517	0.33063160869148	-3.82345319205335	0.000131595583111804	0.00998388702480505	hervdb4
081435804HRFBgag	10.0590289983509	-1.30197951577625	0.280678301451313	-4.63868959247673	3.50625200047275e-06	0.000526727086235521	hervdb4
081435805ERVHpol	37.525358814729	-1.28744082486901	0.261534678790782	-4.92263905812244	8.53848502277228e-07	0.000158705145827661	hervdb4
081467101-MALR1002uL	4.23743946384818	5.51828653686188	1.02879746345232	5.36382206692488	8.14791702486378e-08	2.18170537497549e-05	hervdb4
081482801-HERV0406uL	55.5895506690704	-1.50348625244139	0.370174458326042	-4.06156129528837	4.87456156385201e-05	0.00458917621781857	hervdb4
081521201-HERV0422uL	2.10554945985049	4.60745220873705	0.98947155032837	4.65647769984696	3.21665102977357e-06	0.000489579929978957	hervdb4
081521202-HERV0422uL	3.22558701777913	5.45443297506717	1.23872951621691	4.4032477660862	1.06642255863006e-05	0.00133744111418794	hervdb4
081734301-MALR1041cL	2.36817415542607	2.68574251059669	0.686404025236296	3.91277208736082	9.12426413864904e-05	0.00750308564311372	hervdb4
081817102-HERV0491uL	2.42475344469387	5.16888437586015	1.18678018247411	4.35538480688516	1.32833357814444e-05	0.0015955635800889	hervdb4
081891702-MALR1010cL	6.16101755228788	3.42763030524789	0.618181312652974	5.54470061629321	2.94457552125912e-08	9.18908810600125e-06	hervdb4
081895101-HERV0741uL	2.75415520893545	3.54923599381253	0.771857832341405	4.5983027509691	4.25946721798334e-06	0.000621842790906428	hervdb4
081906202-MALR1020uL	3.46027963026529	4.52864427351791	0.880740644151488	5.14185907462104	2.7203313990419e-07	6.05134232112513e-05	hervdb4
081921201-HERV0958cI	37.9605742766475	-1.00760694863572	0.23061920598812	-4.36913718577119	1.24738391628923e-05	0.00152043261900488	hervdb4
081922103HADPgag	2.1929721118134	4.72162824716485	1.12227661260563	4.20718759896679	2.58568485550017e-05	0.00273312323653874	hervdb4
082001201-MALR1127uL	20.1380413771644	1.41791354030152	0.268849803560693	5.27399879606541	1.33482782635998e-07	3.29242921286422e-05	hervdb4
082001202-MALR1127uL	24.5470615070798	1.44205442149609	0.243165814662055	5.93033368403456	3.02319666586324e-09	1.32129686018622e-06	hervdb4
082002702-MALR1022cL	3.63574895716344	3.14283471517932	0.633182284382456	4.96355440241752	6.92146419375863e-07	0.000133512312646922	hervdb4
082062203HK08sLU3p	5.15452470035636	1.603100247329	0.410491428742994	3.90531966096834	9.41009121661466e-05	0.0076853138479398	hervdb4
082062301-MALR1022uL	8.45446319001001	4.01769851818466	0.575890689835811	6.97649499999751	3.02635104949916e-12	4.2632611666253e-09	hervdb4
082074602-HERV0513uL	14.8109457091406	5.47854646076301	0.729125479070374	7.51385957290656	5.74091649828104e-14	1.60662326067217e-10	hervdb4
082076002-MALR0820cL	2.08319200286461	4.3975047718829	1.11970711792146	3.92737056101431	8.58796126238528e-05	0.00717773197801768	hervdb4
082243501-MALR1022uL	6.78270583662542	-1.20091626394426	0.279695118140309	-4.29366186985725	1.75750072114024e-05	0.00200225837245597	hervdb4
082243601-MALR1003uL	28.0781666461334	-1.3516504033474	0.285807237461693	-4.7292378434908	2.25364247784454e-06	0.000360728326873437	hervdb4
082243602-MALR1003uL	45.7965503332978	-1.41553590008599	0.28261753901376	-5.00866260822217	5.48095573987772e-07	0.000110324899121367	hervdb4
082279402-MALR0819cL	5.89460195302033	-1.0581810833827	0.262869820682852	-4.02549475110486	5.68556487447199e-05	0.00519621997034309	hervdb4
082290002-HERV0436uL	2.42934318601196	2.98422324089774	0.740960403797599	4.02750703762695	5.63713806371751e-05	0.00515875435356342	hervdb4
090082302-MALR1041cL	2.902910565246	-1.72441243821215	0.439212909929501	-3.92614242256436	8.63190571137316e-05	0.00720231767242298	hervdb4
090082401-HERV0466uL	1.91700053140175	3.81563563708323	0.974372596226028	3.91599235432326	9.00331011795241e-05	0.00743003252587835	hervdb4
090294401-MALR1127uL	2.04646392127349	4.3979713580689	1.12136312489177	3.92198678594267	8.78218095922694e-05	0.00729612745145064	hervdb4
090300102-MALR1130cL	19.7335214455456	1.42301635628587	0.29065281231596	4.8959318334032	9.78409802977196e-07	0.00017776323027704	hervdb4
090309104-HERV0173cI	2.44421091604906	2.51458198805805	0.654305821308279	3.84312947580103	0.000121475340536976	0.00936972053192739	hervdb4
090481801-HERV0509uL	3.86545684752847	4.86485997878186	1.07871509658472	4.50986548179805	6.48687460459871e-06	0.00088268048586203	hervdb4
090491701-HERV0615uL	33.5748158155559	2.50571572322733	0.419563782116606	5.97219262012215	2.340859118896e-09	1.07308445368466e-06	hervdb4
090494302-MALR1026uL	8.31690793435732	6.73695241294861	1.17208050282054	5.74785810081863	9.03810376280125e-09	3.3688536710712e-06	hervdb4
090501602-HERV0949uL	3.59543888363114	-1.24150788184809	0.30590077412792	-4.05853135019829	4.93823047937869e-05	0.00464156213692847	hervdb4
090518101-MALR1009uL	8.49409295662785	2.08665300104467	0.418989000695666	4.98020949853125	6.35154783636562e-07	0.000124279718470894	hervdb4
090534301-HERV0766cI	3.8228594703883	3.03479686563404	0.682493721598881	4.44662971920739	8.72280020757323e-06	0.00113243027610627	hervdb4
090763302-HERV0379uL	3.26519009292098	4.7127454504023	0.994203536758068	4.74022197282638	2.13484209097367e-06	0.000344733784276261	hervdb4
090792601-MALR1041uL	3.20720200376595	5.8038281275768	1.48454259290185	3.90950596859063	9.24850704585793e-05	0.00758548077299366	hervdb4
090859501-HERV0423uL	1.66769419498705	-2.35621985117831	0.525253760298677	-4.48586955348683	7.26171618118892e-06	0.000972207079165193	hervdb4
091118502-HERV0402cL	5.3016328936663	-1.5117933775707	0.313998519237317	-4.8146512959448	1.47457149541679e-06	0.000253570763300067	hervdb4
091155501-HERV0482cL	4.57650988488411	-1.25445677090882	0.319512562386104	-3.92615789983531	8.6313505942492e-05	0.00720231767242298	hervdb4
091169004ERVHpol	112.470470993513	-1.01527003067	0.264680317153841	-3.8358350238786	0.000125138391757781	0.00958620854476495	hervdb4
091169005ERVHenv	15.0868271856137	-1.08320696761301	0.260800322376436	-4.15339581539904	3.2757739208293e-05	0.00331997390772834	hervdb4
091171501-HERV0539cI	4.04298571947779	1.7568602758185	0.450541006298594	3.89944589117855	9.64130795721657e-05	0.00783359093259962	hervdb4
091178802HFRDgag	17.7491219801302	3.81866817957499	0.520458247909898	7.33712683949256	2.1822777866152e-13	4.82352890134527e-10	hervdb4
091181001-MALR1126uL	2.94837749912125	-2.31046488122566	0.501271103323907	-4.60921219257418	4.04197642147664e-06	0.00059599644466229	hervdb4
091475001-HERV0548uL	7.2314677831939	1.40958097981619	0.268093827025534	5.25778976508077	1.45797056507577e-07	3.55298416778508e-05	hervdb4
091497401-MALR1026uL	18.7280497978031	-1.37831035030635	0.274876063941025	-5.0142974639002	5.32275864979542e-07	0.000107765677167562	hervdb4
091497402-MALR1026uL	28.3289480065665	-1.39883543038987	0.262701270141143	-5.32481411162689	1.01056330337018e-07	2.60539136356255e-05	hervdb4
091497601-HERV0490uL	12.1069499308338	-1.47640999347236	0.346026190231428	-4.26675793668947	1.98334155687194e-05	0.0022102093354711	hervdb4
091507601-HERV0566uL	23.7364746070343	-1.08398108505925	0.269349783070885	-4.02443645099939	5.71119131684565e-05	0.00521457373539145	hervdb4
091606902-MALR1005cL	3.09928320916917	-1.98169202423998	0.416166116843855	-4.76178127923735	1.91891597533877e-06	0.00031619288782624	hervdb4
091622701-MALR1026cL	41.4384129767819	1.66646472861618	0.296442233723503	5.62154962767728	1.89252114187787e-08	6.33310208924262e-06	hervdb4
091622702-MALR1026cL	45.0353014398094	1.62734948729128	0.311117656933914	5.23065615538803	1.68909426346967e-07	4.01197461539524e-05	hervdb4
091622801-HERV1035uL	35.3925948813727	1.73978899221721	0.350626423776832	4.96194489130849	6.97907990493325e-07	0.000134399573174802	hervdb4
091686302-MALR1002uL	1.89676987223773	4.16069509692198	1.04941607870724	3.96477162999777	7.34662470585554e-05	0.0063214126095363	hervdb4
091701801-HERV0492cL	2.41596656791996	4.98656886432028	1.16191806324485	4.29166997403796	1.77334381192802e-05	0.00201832000529768	hervdb4
091702001-MALR1023uL	11.682635241157	7.228849719108	1.06473999713742	6.78930982074772	1.12671247090989e-11	1.2653455069746e-08	hervdb4
091702002-MALR1023uL	1.68074522974276	3.68102801588282	0.954998125372364	3.85448716399056	0.000115972467555225	0.00902551372303523	hervdb4
091713901-MALR1010uL	2.56464803269129	-1.62002418382469	0.420189176254731	-3.8554638609791	0.000115510394579143	0.00899762449536574	hervdb4
091717001-HERV0861uL	1.27580795908454	-2.31112533673514	0.565305339470961	-4.08827791879341	4.34587316057824e-05	0.00417475266197999	hervdb4
091758002-HERV0923cL	6.25467368984765	1.90716676776243	0.455752176885739	4.1846575057404	2.85596369192419e-05	0.0029753122797104	hervdb4
0X0215102-MALR1002uL	3.16513982745375	-1.58952785505099	0.384194488683578	-4.13729999224462	3.51416535194528e-05	0.00351335540314621	hervdb4
0X0215202-MALR1045uL	4.52128963487605	-1.5401379941518	0.363415862648387	-4.23794928192752	2.25570707724231e-05	0.0024507685345793	hervdb4
0X0352702-HERV0815cI	5.58035261995932	2.93788833849019	0.733330756536785	4.0062254477974	6.16967639203966e-05	0.00552231223242067	hervdb4
0X0485601-HERV0746cL	6.06131450903058	6.21912249156359	1.03625552329178	6.00153374508232	1.95462308048803e-09	9.16535275328093e-07	hervdb4
0X0715402-MALR1008uL	55.1908049226576	1.09989955974321	0.270628047846559	4.06424821261258	4.81875252640957e-05	0.00454156301389095	hervdb4
0X0916207HK085LR	2.50800084061897	-1.72216687775297	0.407792117852466	-4.22314900744607	2.40912427967352e-05	0.00257949493221939	hervdb4
0X0932201-HERV0425uL	26.2178987413508	3.04901614747219	0.397089346426323	7.6784133719838	1.61071021275177e-14	5.40166884926655e-11	hervdb4
0X1138104-HERV0184cI	2.22121983998477	4.84118121726373	1.14645706840197	4.22273223367343	2.41358499337384e-05	0.00258347398026092	hervdb4
0X1150501-MALR1041uL	12.904488805542	-1.15494926826432	0.281588290574469	-4.10155289450462	4.10386667287217e-05	0.0039857929270084	hervdb4
0X1150502-MALR1041uL	14.5535435970083	-1.13646401997556	0.249373688267434	-4.5572731745331	5.18220060594361e-06	0.000730730294300915	hervdb4
0X1170401ERVH5LU3I	2.24885166909174	3.87284230518375	0.999449754268152	3.87497449335974	0.000106635868475196	0.00845571592909099	hervdb4
0X1209702-HERV0489uL	26.7838570136043	-1.25313408995689	0.280358451402876	-4.46975678345479	7.8308593508368e-06	0.00103561921186257	hervdb4
0X1209801-MALR0819uL	12.2037955349811	-1.28050192442475	0.321284873518748	-3.98556555246609	6.73195881273721e-05	0.00591124581780381	hervdb4
0X1486201-MALR1026uL	3.61421579919756	5.03142543261605	0.904233789770405	5.56429707619484	2.63211216001123e-08	8.31115160843583e-06	hervdb4
0X1767504-HERV0806cI	2.89229107200177	2.89452331421171	0.708610552951987	4.08478719679444	4.41172296786592e-05	0.00422916050914041	hervdb4
0X2198001-HERV0415uL	5.0394019106771	-1.2039036589423	0.30147699540993	-3.99335165625259	6.51458415680215e-05	0.00576265866452583	hervdb4
0X2198303-HERV0116cL	12.8218019547828	1.59086851371739	0.382580836275779	4.15825457752576	3.2068852121781e-05	0.00326445675074814	hervdb4
0X2261701-HERV0949uL	26.2943770577484	-1.21389911436996	0.203395913892533	-5.9681588048585	2.39945776523444e-09	1.09272944054023e-06	hervdb4
0X2262502-MALR1025uL	3.90107296259338	-1.47965228842728	0.368607448337879	-4.01416817565493	5.96558022360438e-05	0.00539108241977915	hervdb4
0X2262701-MALR1025uL	9.66325555941358	-1.33189239365661	0.328027236241761	-4.0603103843334	4.90075233820112e-05	0.00460883218537277	hervdb4
0X2266602-MALR1004uL	2.97876821646578	2.07169544307779	0.52999263931519	3.90891361388463	9.27121065868466e-05	0.00759740618061397	hervdb4
0X2266802-MALR1022uL	21.5164929561825	3.51794284044591	0.415504168435303	8.46668483181217	2.52476048268596e-17	2.03754042488764e-13	hervdb4
0X2278001-MALR0819cL	1.65837752579395	-2.34463531827038	0.574174929126027	-4.08348605857667	4.43650920773326e-05	0.00424705496625543	hervdb4
0Y0011507-HERV0623cI	2.60084430740465	5.12127503653677	1.25163204817574	4.09167777702805	4.28263448785745e-05	0.0041259295390791	hervdb4
100007803-HERV0463cI	33.0053586516791	-1.63849628931966	0.345464039156908	-4.74288523146534	2.10695648339191e-06	0.00034182143004519	hervdb4
100007804-HERV0463cI	17.8324847974831	-1.53039168370529	0.343191060560902	-4.45929938036282	8.22279988449629e-06	0.00107759668274845	hervdb4
100099702-HERV0583uL	13.6856541766133	-1.26341854308066	0.254794069049894	-4.95858693960911	7.10077608202684e-07	0.000136168403247845	hervdb4
100102203-MALR1132cI	16.5253235419694	1.16473440340492	0.290514331956038	4.00921495185019	6.09209430014369e-05	0.00547263412900819	hervdb4
100122202-MALR1023uL	3.06358650491006	4.56679292956336	1.13645295940264	4.01846190973345	5.85792763788765e-05	0.00531455699058764	hervdb4
100244001-MALR1017uL	2.41787756403312	4.4032816532573	1.04805365699201	4.20138952226458	2.65281697294866e-05	0.00279550476996599	hervdb4
100374202-MALR1019cL	2.62434749301855	3.92366479088701	0.867082345728815	4.52513513879587	6.03569257358696e-06	0.000831483142868657	hervdb4
100399101-HERV0799cL	4.40178702686826	3.34555493400121	0.634870679027713	5.26966364098722	1.36673977365558e-07	3.35896626242181e-05	hervdb4
100399102-HERV0799cL	6.2951464947387	3.71727378678431	0.613881668848958	6.05535883447096	1.40104993474134e-09	6.85743791754497e-07	hervdb4
100410302-MALR1044cL	1.97185362787969	5.01707698777478	1.16492693382479	4.30677396332685	1.65652730070687e-05	0.00191042905912695	hervdb4
100417302-MALR1043uL	6.23565534013193	2.56505335540877	0.521737971677126	4.91636318354098	8.81667648397875e-07	0.000162742716673952	hervdb4
100445002-HERV0810uL	2.07724970656834	3.51910759620228	0.874484598456546	4.0242076331744	5.71674644270734e-05	0.00521770992085837	hervdb4
100493702-MALR0819uL	5.11432238036015	2.54805785753236	0.47697914574789	5.34207392555303	9.18891641985505e-08	2.40416988670565e-05	hervdb4
100577101-HERV0700cI	5.25027834978443	1.6505027754987	0.36039174442882	4.57974634828154	4.6554016855726e-06	0.00066978337186045	hervdb4
100585801-MALR0820cL	6.8421764034485	1.42034610515104	0.368794387724627	3.85132245074075	0.000117481689768717	0.00911027843207604	hervdb4
100874801ERVFsLU3p	3.85897342349719	4.75071953878155	1.10323863973879	4.30615767764112	1.66114670525481e-05	0.0019151200320848	hervdb4
100994601-HERV0541cL	30.2706739028109	-1.63219493215083	0.29782562114719	-5.48037111738006	4.24434602879192e-08	1.25564617127994e-05	hervdb4
100994602-HERV0541cL	22.6394095576509	-1.77341060052502	0.329096582753402	-5.38872383811372	7.0959745151885e-08	1.93893313091395e-05	hervdb4
101045002-HERV0750cL	5.53732048384013	5.73477727724717	0.946165331274196	6.06107314196788	1.35216321912445e-09	6.63688373833901e-07	hervdb4
101251401-MALR1001uL	4.76445203196002	2.39811586915933	0.495268041838517	4.8420565563995	1.28502174957242e-06	0.000226359516516052	hervdb4
101367702-MALR1133uL	42.3482514476257	2.57499190049452	0.315802874896476	8.15379499423058	3.52678516759297e-16	1.94264283945732e-12	hervdb4
101415102-MALR1133uL	17.4797086588622	1.19190601233165	0.237062217529202	5.02781938325885	4.9608879669744e-07	0.000101445335433085	hervdb4
101434101-MALR1004cL	41.796177204228	1.93703362536899	0.2880586213641	6.72444246312149	1.76266052203752e-11	1.79905427752195e-08	hervdb4
101434701-MALR1022uL	6.70877719502311	5.78187661129236	1.04490423917053	5.53340334410182	3.14076091582323e-08	9.67086826094922e-06	hervdb4
101437102-MALR1014uL	2.46635225423779	3.79184144695788	0.837167816073827	4.52936839442892	5.91602701575658e-06	0.000819380868076344	hervdb4
101437901-HERV0762cL	4.72006291817512	3.02931129957315	0.694095086693669	4.36440389457777	1.274698732607e-05	0.00154708284232935	hervdb4
101593101-MALR1017cL	5.64510736552803	2.79263542016035	0.538959868679755	5.18152757273234	2.20076048316221e-07	5.03101385287845e-05	hervdb4
101608701-HERV0933cL	3.81059042366763	2.09797997549798	0.517427359203779	4.05463672954281	5.02122736845469e-05	0.00470413356244277	hervdb4
101716602-HERV0515uL	2.2233419417972	3.20773420068296	0.764694430380735	4.19479215911884	2.73121909178393e-05	0.00286929533864701	hervdb4
101770302-HERV0549cL	3.96521699908854	3.68397635652651	0.862030581615773	4.27360285712989	1.92339494992834e-05	0.00215726087758285	hervdb4
101771102-HERV0585uL	9.91480244001397	-1.76582347523185	0.356801076957999	-4.94904188711213	7.45796970472032e-07	0.000141811761475728	hervdb4
101823701-MALR1018uL	14.5841734674888	-1.54133073043194	0.388289701716417	-3.96953801148617	7.2012118763875e-05	0.00621942395555996	hervdb4
101823702-MALR1018uL	17.3823484458679	-1.43172333040341	0.341971390141062	-4.18667576200695	2.83069747420665e-05	0.00295431169172689	hervdb4
110008301-MALR1002cL	41.8525552560864	1.58018253028903	0.254275078063175	6.21446089929597	5.15011559496725e-10	3.02914087078904e-07	hervdb4
110021601-HERV0406uL	10.1570621289799	1.35965183668686	0.298049396345985	4.56183388846233	5.070875886877e-06	0.000718243000107778	hervdb4
110022201-HERV0118cI	20.0164865013932	-1.4330753598964	0.329893242763904	-4.34405793792514	1.39874599227012e-05	0.00166687099669498	hervdb4
110022301-HERV0817uI	11.374682520998	-1.51748894135907	0.342710926113094	-4.42789775794397	9.51559856304011e-06	0.00122051231218505	hervdb4
110022601-HERV0588cL	6.31947030596656	-1.67934821829469	0.42299476777099	-3.97013945856628	7.18305756968522e-05	0.0062099268506033	hervdb4
110022602-HERV0588cL	4.34630172456765	-1.96824546291825	0.465285414364972	-4.23018947543097	2.33494557216057e-05	0.0025163751939477	hervdb4
110041001-MALR1022uL	3.21487241975914	3.1174432842334	0.725555373135381	4.29663041534904	1.73413961695083e-05	0.00198215128417087	hervdb4
110041002-MALR1022uL	9.39968197780772	6.09695623769711	0.92028446077731	6.62507789444513	3.47065113626726e-11	3.21169428615324e-08	hervdb4
110041602-MALR1044cL	3.27426540104719	4.16259293274033	0.879968550643426	4.73038829591884	2.24090804175087e-06	0.000359021195128525	hervdb4
110063401-MALR1127uL	3.91791285955843	5.02761038862322	0.908241045233347	5.53554633432308	3.10259696625173e-08	9.59592869187767e-06	hervdb4
110074302-HERV0615uL	7.58571610349191	-1.04738826084486	0.244681698113209	-4.28061546458722	1.8637715713823e-05	0.00210193698635387	hervdb4
110108402-HERV0741cL	3.55238568519971	4.40661183009818	0.930859734453499	4.73391604234044	2.20228853587984e-06	0.000353650239574744	hervdb4
110188502-MALR1128uL	33.6423564114516	-1.61650725346207	0.402132287435143	-4.01983950050959	5.8237802779773e-05	0.00529049275409341	hervdb4
110222802-MALR1018uL	3.69449008669937	1.97604755265328	0.446937289305695	4.42130831312603	9.81050728828398e-06	0.00125301517820401	hervdb4
110401901-MALR1003cL	5.24737403649605	1.58031345840394	0.389066261966376	4.0618105780154	4.86935812225762e-05	0.00458552145342155	hervdb4
110464602-MALR1012uL	3.90103861556421	3.37877154169488	0.64324655747715	5.25268499678664	1.49897779112967e-07	3.63693605694391e-05	hervdb4
110492901-MALR1025cL	7.28209195105	-1.00592952786555	0.258156806272782	-3.8965834075381	9.75592190541297e-05	0.00789897344754178	hervdb4
110501002-HERV0530uL	3.60825677243416	-1.34752022852375	0.341137956602303	-3.95007416338219	7.81269814472543e-05	0.00665642649197795	hervdb4
110682802-MALR1126uL	18.2091722320615	-1.31565110701193	0.306607777765671	-4.29099064805013	1.77877806651808e-05	0.00202317785854836	hervdb4
110699801-MALR1014uL	3.78411981070403	-1.86718467916221	0.441528886154362	-4.22890718526946	2.34829192828291e-05	0.00252683493008601	hervdb4
110701201-MALR1023cL	2.05365909620493	2.76239170981078	0.698457487769762	3.95498904111022	7.65381600425778e-05	0.00654923531818215	hervdb4
110736102-HERV0371uL	6.33948860126632	3.94759194076448	0.635412963332562	6.21263991855072	5.21017509020946e-10	3.05928081185192e-07	hervdb4
110798902-MALR1020uL	3.29402022805552	3.91756620222475	0.77945198448363	5.02605199577502	5.00680190364927e-07	0.000102073034893827	hervdb4
110814001RRHIsLU3	34.4277426577223	2.04264168868304	0.396680464818092	5.14933774119618	2.61407801114589e-07	5.8374346938729e-05	hervdb4
110814601ERVLsLU3	8.65977779121769	2.89217352047635	0.533927129689999	5.41679446435989	6.06770233416186e-08	1.6939775253426e-05	hervdb4
110817901-HERV0625uL	11.6373624326287	3.69130472566104	0.498397595037999	7.40634538049808	1.29827449562191e-13	3.08580284568982e-10	hervdb4
110817902-HERV0625uL	8.99864158891189	2.03804991314745	0.423624864113777	4.81097802748442	1.50193529716523e-06	0.000257510665426027	hervdb4
110818201-HERV0513uL	4.63372507156117	1.7409562887724	0.42529141349006	4.09356087038208	4.24798490105416e-05	0.00409823664265726	hervdb4
110820901-HERV0201cL	73.4880955515515	1.71505870446619	0.23892225125519	7.17831300959222	7.05768329303944e-13	1.25597808017977e-09	hervdb4
110885801-MALR1023uL	3.75803433705601	2.31608508844147	0.504037616017628	4.59506396911549	4.32616530920047e-06	0.000629197772673406	hervdb4
110892501-HERV0602uL	14.7947468617958	-1.09859453532291	0.227289525022326	-4.83345871401245	1.34181116889688e-06	0.000234714285893421	hervdb4
110892802-HERV0897cL	5.32844003677172	-1.45260972345928	0.351120755302848	-4.13706595671447	3.51775017935315e-05	0.00351592646094219	hervdb4
110899801-HERV0794uL	18.3968093459386	1.50735359256606	0.304432860218116	4.95134983617109	7.37004777507992e-07	0.00014058504099951	hervdb4
110911502-HERV0436cL	5.92354666835011	-1.26622666593804	0.299703703784057	-4.22492832070698	2.39016843144272e-05	0.0025615696389106	hervdb4
110922001-HERV0371uL	12.7971838422473	1.98591161831544	0.397854702395073	4.99154994614949	5.98966894139038e-07	0.00011857016064126	hervdb4
110923402-MALR1004cL	3.57688792880861	2.63791011824755	0.635208838335793	4.15282338507554	3.28398192996729e-05	0.00332634970617994	hervdb4
110928602-HERV0799uL	4.61588363032401	3.44601590504247	0.690815860871303	4.9883277154293	6.09041909847833e-07	0.000120358612503072	hervdb4
110956401-HERV0741cL	3.15904583537439	4.53168150331661	0.930472103392726	4.87030345863461	1.11426987322686e-06	0.00019972827035495	hervdb4
110996402-MALR1041cL	9.44088381681472	4.87935727254126	0.737269859534225	6.61814288139193	3.63739375192154e-11	3.3304706590813e-08	hervdb4
111018701-HERV0201uI	27.8941140652375	-1.07094290796149	0.273970668301146	-3.90896921412156	9.26907739125517e-05	0.00759740618061397	hervdb4
111022802-HERV0490uL	1.99714080056811	4.53396957603703	1.06105437241566	4.27307939527613	1.9279177034742e-05	0.00216093669722098	hervdb4
111317202-MALR1018uL	3.37757256927919	4.21433707943061	1.03095961121222	4.08778096988235	4.3551904695707e-05	0.00417843018178165	hervdb4
111412401-HERV0583uL	18.0635734140127	-1.19460627332545	0.278169544423196	-4.29452575695356	1.75067156836569e-05	0.00199684855136468	hervdb4
111508101-HERV0899uL	5.21179482767105	5.34002188083403	0.987285668240555	5.40879104459249	6.34516076868419e-08	1.7601100639079e-05	hervdb4
111509501-HERV0606uL	12.7098762319699	3.11010433145165	0.484639224916909	6.41735990722765	1.38657854812635e-10	1.00243851618918e-07	hervdb4
111510001-HERV0813uL	55.4656098248877	3.17803858406064	0.406820378372558	7.81189623974601	5.63339298719584e-15	2.17211114935189e-11	hervdb4
111532102-HERV0741uL	1.80627981730413	3.28608305894555	0.805056524258337	4.08180414657577	4.46874481587076e-05	0.00427084501791096	hervdb4
111636002-HERV0402uL	10.7120274958401	-1.01859659259754	0.252438259066598	-4.03503255157853	5.45947281944409e-05	0.00501733648782704	hervdb4
111638001-HERV0490cL	7.52954017783656	2.05885203518215	0.466589049695075	4.41255969579151	1.02155614948182e-05	0.0012937971350116	hervdb4
111646101-MALR1026uL	11.7489664433657	6.9496983645618	1.22681287705854	5.66483976042434	1.47161994046326e-08	5.12732481666227e-06	hervdb4
111674402-MALR0818uL	5.04606011294938	-1.17063018602412	0.299879297054448	-3.90367123546904	9.47444617355949e-05	0.00772877835248851	hervdb4
111757102-MALR1042uL	7.58878399419044	-1.43526229810744	0.264765550438126	-5.4208800794983	5.93063356968927e-08	1.66374168258171e-05	hervdb4
111757201-MALR1127uL	9.78541181912595	-1.41197909465517	0.297541571504695	-4.74548510150923	2.08007224245143e-06	0.00033840912778973	hervdb4
120003403-HERV0116cL	3.60464855037327	3.08735152867397	0.794235344391021	3.88719987152069	0.000101407252507042	0.008148573161822	hervdb4
120006501-HERV0863uL	6.06244154712609	6.42020257972135	1.18284970170014	5.42774163995092	5.70715715438347e-08	1.60885270163619e-05	hervdb4
120006502-HERV0863uL	8.19237871977828	6.40698081178611	1.129346827138	5.67317378313511	1.40175898819137e-08	4.92346562836204e-06	hervdb4
120028302-HERV0608uL	2.38867154007658	-1.68562422614289	0.440519022939591	-3.82645047856206	0.000130004288128757	0.00987611384992145	hervdb4
120029302-MALR1023uL	2.27395403655241	3.16499945988151	0.821647936672694	3.85201412748426	0.000117150262425339	0.00909473916484142	hervdb4
120060701-HERV0422uL	3.87910122531454	-1.40758632549609	0.320069111381314	-4.39775747000829	1.09375099310898e-05	0.00136579154238459	hervdb4
120060702-HERV0422uL	4.46823341829497	-1.19164057157693	0.294665562289554	-4.04404424567932	5.25369978532441e-05	0.00487209754009427	hervdb4
120061901-MALR1004uL	3.38110713239403	1.87004331608498	0.486803754073727	3.84147266826902	0.000122298355673687	0.0094227298814127	hervdb4
120063501-HERV0557cL	8.33310854596801	-1.12526341590843	0.249208113767684	-4.51535625745083	6.32104104546901e-06	0.000862914108418039	hervdb4
120076101-HERV0739uL	13.2938631700507	-1.2769407623031	0.325709800686948	-3.92048614935729	8.83705152992621e-05	0.00733263343971443	hervdb4
120076102-HERV0739uL	37.9407784339827	-1.45439966467347	0.338170408730768	-4.30078926814493	1.7019084847807e-05	0.00195367609126232	hervdb4
120077902-MALR1014uL	7.20878370541069	-1.01679611149911	0.263943433519696	-3.85232584853542	0.000117001184986422	0.00908619585786071	hervdb4
120095502-HERV0500uL	4.25326654612635	2.74712106462011	0.627941176356763	4.37480638004751	1.21540308377968e-05	0.00149030639898343	hervdb4
120102002-MALR0818uL	10.5585973455704	-1.14360423242894	0.276957458915307	-4.12916928436528	3.64076277020002e-05	0.00361907045693157	hervdb4
120106301-HERV0492uL	21.6276855908371	-1.33749409572946	0.222823265810788	-6.0024885231922	1.94316000919744e-09	9.12470076308114e-07	hervdb4
120134301-HERV0558uL	14.1142715730615	6.9069483996323	1.09734611898701	6.29422957818296	3.08930323313168e-10	1.98250165459152e-07	hervdb4
120147702-MALR1133cL	7.39220356769735	2.11535817289583	0.430104734836065	4.91823967876593	8.73259496336415e-07	0.000161793118216051	hervdb4
120173311ERVL5LR	6.56799118665186	1.75057832295953	0.412789711438057	4.24084775965213	2.22677138609027e-05	0.00242692904020429	hervdb4
120286204-HERV0806cI	4.67054107444315	2.55154781945137	0.53047543843267	4.80992640675337	1.5098587532616e-06	0.000258486030861786	hervdb4
120422501-HERV0971uL	2.72396132119086	2.99906699234981	0.675388251893995	4.44050808396431	8.97467332048055e-06	0.00116165279211979	hervdb4
120427401-HERV0954uL	4.35841799815802	6.25677756604632	1.40238235683286	4.46153471309824	8.1374761113783e-06	0.00106843244804029	hervdb4
120433101-HERV0909cL	3.49125972464551	3.28086250830053	0.724916899556217	4.52584635605684	6.01542729436531e-06	0.000829933244746375	hervdb4
120604602-HERV0616cL	314.181571748584	1.61487801405106	0.238583683517278	6.76860206969734	1.30032638517837e-11	1.43706771396369e-08	hervdb4
120640301-HERV1038uL	2.71390675442978	2.74448189666729	0.697978006809545	3.93204638239579	8.42258094479498e-05	0.00706503272773206	hervdb4
120641002-HERV0548uL	1.72962492331767	4.00983012822784	0.947041040353748	4.2340616270759	2.29508005696342e-05	0.00248266421872645	hervdb4
120641201-MALR1015cL	8.50430307412583	6.58937836948229	0.967376464792722	6.81159673539731	9.65213589475045e-12	1.11278544790575e-08	hervdb4
120641202-MALR1015cL	2.03598077958951	3.16975632091417	0.768614411956942	4.12398762188672	3.72368914186463e-05	0.00368776999432039	hervdb4
120666907ERVH5LU3I	40.601914289991	1.17543453505286	0.244308675044998	4.81126810104621	1.49975677664412e-06	0.00025726425933319	hervdb4
120679601-MALR1004uL	30.198798398192	-1.04431213054875	0.232093010134101	-4.49954149823535	6.81001852709444e-06	0.000920612633140753	hervdb4
120680402-MALR1018uL	3.71339219071746	2.68455784361477	0.683697161011566	3.92653062891591	8.61799225161796e-05	0.00719763097751255	hervdb4
120689202-MALR1127cL	7.54080822349562	1.80018152968011	0.420873226045438	4.27725362003845	1.89213191026831e-05	0.00212700879657049	hervdb4
120827601-HERV0117uL	21.7175815869729	-1.02138263580064	0.266908443878443	-3.82671533713563	0.000129864547005712	0.0098676582224485	hervdb4
120827602-HERV0117uL	10.288244400521	-1.34652425171502	0.287988153838808	-4.67562374967929	2.93061488495379e-06	0.000451390136429944	hervdb4
120910001-MALR1046cL	13.1810809708953	5.15403927268271	0.905584386330838	5.69139591017615	1.26004961160966e-08	4.49396111223829e-06	hervdb4
120977803MR41sLU3	6.31212055901158	-1.0464906433968	0.26362485282394	-3.96962058844918	7.19871677423405e-05	0.00621881676623027	hervdb4
121193103-HERV0372cI	3.974708174607	2.56218800942728	0.545172323446586	4.69977638121668	2.60446523051779e-06	0.000407852673417998	hervdb4
121259201-HERV0481uL	4.76234086309791	-1.43863892384023	0.37006471151387	-3.88753339370027	0.000101268059196233	0.00814604587442666	hervdb4
121260702-HERV0537cL	3.90665282681016	5.68345106779579	1.08577691676295	5.23445560506112	1.65471835860618e-07	3.94924597526491e-05	hervdb4
121294001-MALR0818uL	2.03070085976683	4.50998376120679	1.1560486308157	3.90120591901447	9.57146882483188e-05	0.007795097656872	hervdb4
121304301-MALR1018cL	4.25449281257433	3.26054400314476	0.637840614725864	5.11184758052151	3.19023186541481e-07	6.94961871899717e-05	hervdb4
121304302-MALR1018cL	4.95068535611177	4.53857659509432	0.771717637784663	5.881136276894	4.07459507079613e-09	1.70975330286297e-06	hervdb4
121317201-HERV0611uL	2.13991395362354	4.44231028560273	1.04419883144919	4.25427624683075	2.09726256115227e-05	0.00231118467440795	hervdb4
121318902-HERV0566cL	1.81380217110004	4.71234010728001	1.18009202836469	3.99319713548962	6.51883274663271e-05	0.00576494734897167	hervdb4
121422002-MALR1022uL	3.05277828413405	4.88483283512155	1.16662802288309	4.1871382645598	2.82493748334405e-05	0.00295096268955464	hervdb4
121531301-MALR1041uL	2.68692515215049	-1.68928564668667	0.39076255400215	-4.32304894464728	1.5388757659717e-05	0.00180191878582829	hervdb4
121583002-HERV0758cL	13.2490706216961	-1.10829633927364	0.259938685144445	-4.26368371701876	2.01084022673301e-05	0.00223153749754042	hervdb4
121586102-MALR1019uL	25.2156325764627	1.01380125168304	0.23673567461737	4.28241858064536	1.84872787942468e-05	0.00208779875911223	hervdb4
121603001-HERV0740uL	49.7850267593134	1.82714075965618	0.265611067520484	6.87900838136298	6.02706148636853e-12	7.5779379601435e-09	hervdb4
121615802-MALR1041cL	5.52866711635846	2.5850303648134	0.493624190779144	5.23683890113477	1.63350154622363e-07	3.90666923894228e-05	hervdb4
121745502-MALR1001cL	8.03282931375991	5.92761039571062	1.07205271655225	5.52921540535244	3.2166617737111e-08	9.85212682006378e-06	hervdb4
121747302-MALR1022uL	4.48350954768918	4.97321673393839	0.858065978646914	5.79584420976656	6.79783466802069e-09	2.63279529742917e-06	hervdb4
121757801-HERV0489uL	3.90314887979694	-1.56641699118709	0.403902777065595	-3.87820307294569	0.000105230861867194	0.00836591378812225	hervdb4
121998701-HERV0741uL	12.132072399578	-1.4987411762042	0.341386090812272	-4.39016473295146	1.13264822721884e-05	0.00140677017827303	hervdb4
121998702-HERV0741uL	14.0385651726405	-1.47234036990918	0.328742604578796	-4.47870263665893	7.50980610988593e-06	0.00100040419050004	hervdb4
130020602-HERV0811uL	8.31492071439441	-1.14560925531628	0.289179596515251	-3.96158397453143	7.44541870601261e-05	0.00639215536704725	hervdb4
130118901-MALR1004cL	3.10897501308674	5.00052338948808	0.934456544675249	5.35126370293218	8.73421341473258e-08	2.31193496504996e-05	hervdb4
130118902-MALR1004cL	3.52954694158451	6.06604039200105	1.27182785572719	4.76954515871388	1.84642348911342e-06	0.000305991346319073	hervdb4
130153201-HERV0949cL	9.32715697597512	4.06617494627431	0.697565474883565	5.82909431828319	5.57290005198544e-09	2.20765727858446e-06	hervdb4
130165301-HERV0897cL	12.8178505337157	-1.19003721431295	0.272014747568611	-4.374899614635	1.21488373093452e-05	0.00149030639898343	hervdb4
130165302-HERV0897cL	9.09799315468167	-1.24913408572166	0.315386439986356	-3.96064613867259	7.47472311754699e-05	0.00641255479913759	hervdb4
130165402-MALR1131cL	9.83606563860457	-1.44260682138064	0.361114997923749	-3.99486819898089	6.47302525623943e-05	0.00573759067228453	hervdb4
130301401-MALR1008uL	5.35264808008285	-1.2887942604183	0.317475260503042	-4.05951083676944	4.91756257754585e-05	0.0046233881486317	hervdb4
130327301-HERV0817uI	3.44868977419382	4.92293798853076	0.916033461977252	5.37419012827832	7.69276529248165e-08	2.07908365404749e-05	hervdb4
130446201-MALR1041uL	5.47801838810625	3.33833409737184	0.635862857503345	5.2500850741298	1.52028980799303e-07	3.68158387417824e-05	hervdb4
130477802-MALR1004uL	3.92554046386375	3.77940250242882	0.854379107710129	4.42356615268627	9.70848859979388e-06	0.0012413558267872	hervdb4
130879501-MALR1004uL	19.7491013622085	9.38039583816047	1.75446273503935	5.34659166639415	8.9625899829564e-08	2.35799694911716e-05	hervdb4
130890602-MALR1004uL	5.85131213604196	2.37051806761146	0.554617705377714	4.27414784026243	1.91869698865196e-05	0.00215350865983808	hervdb4
131353202-HERV0496cL	5.90815812707131	5.67087860870347	0.859326466763438	6.59921325368021	4.13345387101728e-11	3.73539365187608e-08	hervdb4
131357202-MALR1018uL	2.70660228496041	3.76507049657069	0.918209429361238	4.10044852097619	4.12350159545753e-05	0.00400150314221385	hervdb4
131545201ERV9sLU5p	10.447213069854	-1.11026956308632	0.274479167839003	-4.04500484254441	5.23220425856901e-05	0.00485605649052853	hervdb4
131545402-MALR1002uL	4.13358061182663	-1.48476294748645	0.374187780812311	-3.96796213992673	7.24898463374426e-05	0.00625290243003214	hervdb4
131574202-HERV0541cL	4.43259098485609	-1.37066620976586	0.343634421385749	-3.98873373697105	6.64269305962652e-05	0.00584914322646941	hervdb4
131576402-MALR1013uL	1.40058489268958	2.4875165453826	0.629980663093552	3.94856015606499	7.86226599682609e-05	0.00668552694491201	hervdb4
131588801-MALR1002uL	6.26805030981005	-1.40913622436322	0.347974110706865	-4.04954328786341	5.13176851601664e-05	0.00479103123601855	hervdb4
140065101-MALR1042cL	8.32058317142935	3.02215033610435	0.517869686920902	5.83573515197066	5.35539070094554e-09	2.13757490389675e-06	hervdb4
140164501-MALR1014uL	5.02321679207065	6.43809263301708	1.15545906360916	5.57189158472413	2.51988223348889e-08	8.02247277674599e-06	hervdb4
140179104-HERV0700cI	2.67197906220254	4.71678516693067	1.10562273555735	4.26617960651191	1.98848717822631e-05	0.00221274325651168	hervdb4
140210201-HERV0816cI	15.1612054940247	3.05412463908643	0.474213020552629	6.44040654035031	1.19153908901127e-10	8.85413050682425e-08	hervdb4
140213602-MALR1130uL	6.79272518556575	1.87323585798354	0.438926808361378	4.2677636050001	1.97442392968695e-05	0.00220379831731099	hervdb4
140264902-HERV0796cL	3.90692521509589	2.47336441654289	0.620700031860015	3.98479827547473	6.75374747221303e-05	0.00592288462928321	hervdb4
140266001-MALR1023uL	22.8397180612893	1.65556746586659	0.289702109039007	5.71472355295721	1.09882508631746e-08	4.00540211611223e-06	hervdb4
140268601-HERV0799uL	3.26221531395036	2.56300861344957	0.633708207742866	4.04446176037149	5.24434668846723e-05	0.00486602456639545	hervdb4
140384801-HERV0938cL	6.68632191465679	-1.13316300025986	0.290355190195653	-3.90267864506328	9.51339739799392e-05	0.00775690593292258	hervdb4
140384803-HERV0938cI	6.15871073300352	-1.4618376412261	0.298389164220827	-4.89909760980545	9.62778087185162e-07	0.000175290268528329	hervdb4
140468101-MALR1127cL	6.83557192668769	1.58519953892335	0.385196412632923	4.11530192632916	3.86672927861534e-05	0.00380445816349616	hervdb4
140498801-MALR1008uL	3.88813826941186	1.84840237028438	0.43270259970212	4.27176164773878	1.93934803717199e-05	0.00217234524163791	hervdb4
140660902-MALR1126uL	4.10788188947067	3.94734819004732	0.796069914840756	4.95854461581675	7.10232291737076e-07	0.000136168403247845	hervdb4
140662502-MALR0820uL	7.60940644222144	2.44628719722995	0.436094461761459	5.60953511619702	2.02870831005336e-08	6.75626063104335e-06	hervdb4
140671102-HERV0900cL	5.35270569276167	3.93360919807301	0.684666260806438	5.74529434740919	9.17612208762099e-09	3.41296665256831e-06	hervdb4
140675702-HERV0462uL	3.05442774281027	5.25022656758861	1.30875816971465	4.01160939360808	6.03062210659035e-05	0.00543429364692024	hervdb4
140688601-MALR0819uL	6.48461642448704	6.65522372934834	1.10738281540682	6.00986726248176	1.85675286092318e-09	8.75448882877123e-07	hervdb4
140688602-MALR0819uL	1.20118636820936	3.82545098803771	0.977635003293049	3.91296442450621	9.11699702159636e-05	0.00750082160770882	hervdb4
140760101-HERV0817uI	20.6464976993076	-1.39304153705944	0.305535708489234	-4.55934117798387	5.13143474000558e-06	0.000724749891524923	hervdb4
140761801-HERV0417cL	2.21490965619266	4.37781084640245	0.950535724882449	4.6056247354026	4.11229395967568e-06	0.000604937791389001	hervdb4
140796002-MALR1017uL	7.24412855908607	-1.34575634731819	0.317259866430005	-4.24181086142862	2.21723512563463e-05	0.00241957526194255	hervdb4
140796102-HERV0933uL	10.6996007408564	5.77515010483831	0.824580711158402	7.00374144906344	2.49215840143842e-12	3.66452884943711e-09	hervdb4
141079501-MALR1044uL	1.95753696954931	4.05872962260939	0.897717929655936	4.52116359552377	6.15006347036758e-06	0.000844556796789457	hervdb4
141119502-MALR1041cL	8.50273723697431	2.30020192135434	0.413203824845268	5.56674886108737	2.5953602488483e-08	8.23255862482026e-06	hervdb4
141128501-HERV0590uL	7.90652249726619	5.39692478580335	0.875431232695983	6.16487575978178	7.05385014434218e-10	3.87314410931902e-07	hervdb4
141130102-HERV0416uL	5.94182651629381	-1.49958944842073	0.331623177634336	-4.5219681540904	6.1267278903956e-06	0.000842018658425775	hervdb4
141177101-HERV0765cI	2.15593809679425	3.86404234428347	0.803598858260723	4.80842189428523	1.52126444141297e-06	0.000260181954883751	hervdb4
141231202-MALR1004uL	4.51617144422787	5.78845660865507	1.09365812072912	5.29274779653813	1.2049203839359e-07	3.02118115342078e-05	hervdb4
141255302-MALR1126uL	293.127171343766	3.01318917953112	0.333931507682225	9.02337488440451	1.82382165043523e-19	2.04162125527108e-15	hervdb4
141258401-HERV0740uL	2.30909403178021	4.35614001430645	1.06939991872775	4.07344337513032	4.63231179431146e-05	0.00440412284619716	hervdb4
141259501-MALR1003uL	19.2895801882112	4.26245582463313	0.505789283341586	8.42733518684395	3.53625832646232e-17	2.7889826464749e-13	hervdb4
141259502-MALR1003uL	11.3331130690979	3.18844690827598	0.490846935617632	6.49580689398409	8.25895395676706e-11	6.50153183939843e-08	hervdb4
141286501-HERV0796uL	44.4830065119571	1.43951532677044	0.331835334105139	4.33804112709211	1.43758258308815e-05	0.00170204676896366	hervdb4
141292502-MALR1045cL	3.89441776717154	5.75310087734742	1.22231548237479	4.70672339531357	2.51730101616296e-06	0.000396265117651823	hervdb4
141305501MR413LU3	2.03886381920556	3.83290392863582	0.811382962200626	4.72391473224956	2.31347447877466e-06	0.000368605102674189	hervdb4
141306301-HERV0739cL	1.71451909956846	3.82134297136075	0.918934801069853	4.15844841974841	3.2041656257817e-05	0.00326264540921	hervdb4
141306501-HERV0942uL	6.74354463421393	3.69820368626561	0.731883988771723	5.05299165305157	4.34942912978203e-07	9.03795746477221e-05	hervdb4
141323601-MALR1042uL	1.83120119027101	4.13519021200862	1.05541990056044	3.91805215138809	8.92673957477537e-05	0.0073872434655388	hervdb4
141328701-MALR1129uL	5.44987451628998	2.32250659753876	0.483177609359697	4.80673473387256	1.53415331068248e-06	0.000261612718365127	hervdb4
150070201-HERV0517cL	4.47429023298532	2.78483467445999	0.623002400032546	4.47002238565133	7.82114108470781e-06	0.00103472831841986	hervdb4
150070202-HERV0517cL	28.3413462368576	7.52170150407588	1.00366096403937	7.49426526842663	6.66707661761633e-14	1.77969917526555e-10	hervdb4
150190302-MALR1003uL	9.99908547304928	-1.2517785373274	0.272293278568296	-4.59717016853735	4.28267831231183e-06	0.00062444328904977	hervdb4
150279101-HERV0429uL	171.325214719584	2.7436857412218	0.364469391560922	7.52789069466532	5.15665295825942e-14	1.45484691835381e-10	hervdb4
150300002-HERV1036uL	10.3050989950344	1.61022415044032	0.338442274975907	4.75775123115145	1.95761540125526e-06	0.000321348957683822	hervdb4
150400602-HERV0118cI	7.54589378329238	2.28764627786249	0.460127440724603	4.97176667894428	6.63455224175912e-07	0.000128981642517381	hervdb4
150406802-MALR0818uL	2.60686683905288	5.29823947360692	1.13798712546639	4.65579913431403	3.22726459480785e-06	0.000490979991096108	hervdb4
150442507ERVW5LU5	4.04618715181601	1.87628195944284	0.47382055485201	3.95989988241195	7.49811916437681e-05	0.00642785897337461	hervdb4
150503202-HERV0500uL	3.16466145882797	4.0673773825041	0.909712689225318	4.47105710481817	7.78339101588081e-06	0.00103051978265203	hervdb4
150536002-HERV0912uL	2.48252462678595	-2.15826214324992	0.528225998564641	-4.0858688309826	4.39121824135023e-05	0.00421183127173399	hervdb4
150556501-MALR1022uL	3.93136971421731	2.21810227963977	0.527296386128237	4.20655695353152	2.5929076052422e-05	0.00273975508093541	hervdb4
150635501-MALR1013uL	11.954562248721	-1.02662903401453	0.267547006440212	-3.83719125724528	0.000124449547646442	0.00954888417143262	hervdb4
150654601-HERV0750cL	5.26091422232659	5.82808170186399	0.961376515305164	6.06222599479042	1.34250394691718e-09	6.59880622746741e-07	hervdb4
150659401-MALR1007uL	1.67248480283068	2.8776686417857	0.728639133928883	3.94937426194648	7.83557573800843e-05	0.00666824707795853	hervdb4
150660003-HERV0707cI	3.57633037630159	2.11366662231098	0.503396150252485	4.19881364061056	2.68317023312831e-05	0.0028224120469845	hervdb4
150670001-HERV0489uL	5.11829851282583	2.33629430754385	0.450867360897518	5.18177741430011	2.19781399268669e-07	5.02884182201124e-05	hervdb4
150676301-MALR1003cL	1.83785262183251	5.07530939002863	1.24516994582966	4.07599734239245	4.58175419376227e-05	0.00436322815674913	hervdb4
150785404-HERV0118cL	1.25146699553416	4.27998309252894	1.10386522319055	3.87726961825856	0.000105635275126385	0.00839229697215162	hervdb4
150838901-MALR1127uL	12.8781083258902	-1.01644624138874	0.246530863265664	-4.12299793999184	3.73973044276107e-05	0.00369952636965373	hervdb4
150838902-MALR1127uL	10.6367784354909	-1.25584508309006	0.249608844558443	-5.03125233928167	4.87286282804907e-07	9.99397670561222e-05	hervdb4
150839301-HERV0421uL	4.63083979871302	-1.35239468020196	0.34884632382624	-3.87676345666635	0.000105855179201871	0.00840784259250014	hervdb4
150839302-HERV0421uL	11.3929168228989	-1.03061197783104	0.266421810901173	-3.86834686824248	0.000109575716401984	0.00863418826199285	hervdb4
150854902-MALR1023uL	50.3196845537978	1.07960145775349	0.228524758028003	4.72422098624956	2.30999121310955e-06	0.000368557770470471	hervdb4
150855001-MALR1022uL	12.899453389394	2.27975470811852	0.372596341531638	6.11856439262687	9.44221269806593e-10	4.9075553214297e-07	hervdb4
150883901PBLAsLU5p	9.70890391520846	6.49440161063509	1.10281714707729	5.8889196888593	3.8872828227861e-09	1.64154809229757e-06	hervdb4
150923401-HERV0740uL	4.46507061752617	5.92450911844517	1.04000842238297	5.6965972495399	1.22222188100402e-08	4.37704269500532e-06	hervdb4
151017701-MALR0818uL	2.00873572196346	-2.22449766630233	0.566545669160879	-3.92642250640989	8.62186527183875e-05	0.00719829223852228	hervdb4
160009201-MALR1127cL	3.23867212838431	-2.30686554149914	0.504627590373749	-4.57142174844338	4.84426188279449e-06	0.000691223584937231	hervdb4
160012601-HERV0422uL	4.22603250032065	2.17534212514741	0.463560620102901	4.69268102338919	2.69647751556811e-06	0.000421121344488049	hervdb4
160023801-HERV0527uL	6.69296476635945	3.9922321242571	0.712770504707848	5.60100635181789	2.13110926912426e-08	7.03651321190771e-06	hervdb4
160023802-HERV0527uL	5.76870831680312	2.64217364266057	0.530334587244506	4.98208811231545	6.29017788984473e-07	0.000123392737780323	hervdb4
160030201-HERV0902cL	2.85361376251395	4.95472856437346	1.16814910534658	4.24152066007312	2.22010448759427e-05	0.00242194485785905	hervdb4
160163602-MALR1005cL	7.43919218701481	-1.80865313662774	0.41643891300971	-4.34314152718377	1.40459583520416e-05	0.00167243568169525	hervdb4
160169002-MALR1134cL	2.53246500967255	4.85510444546033	1.13246307133972	4.28720774066095	1.80933071576392e-05	0.0020532176094977	hervdb4
160169601-HERV0468uI	20.3018771881869	6.43340577195976	0.846640289895096	7.59874748313348	2.99010584666139e-14	9.0228393992038e-11	hervdb4
160174202-MALR1008cL	2.817216458559	3.83185377603377	1.00022174402434	3.83100427372885	0.000127621288467745	0.00973771757345577	hervdb4
160263301-HERV0907uL	2.26069897063571	4.90158472962763	1.03241804189043	4.74767442135405	2.05768917598229e-06	0.000335396570150012	hervdb4
160353401-HERV0700cI	10.0216214352751	2.13903969936484	0.394092392549886	5.4277619659813	5.70650743085999e-08	1.60885270163619e-05	hervdb4
160353501-HERV0794uL	4.08369216788934	2.06139243876268	0.523054172428168	3.94106872179818	8.11193797125868e-05	0.00683751448818603	hervdb4
160379801-HERV0758cL	9.99632674484004	1.55266828821577	0.364133677453842	4.26400628217802	2.00793794573873e-05	0.00222974280297681	hervdb4
160386401-MALR1026uL	103.623359055217	10.7838865408579	1.32531106290437	8.13687204664647	4.05621001955497e-16	2.16551692459379e-12	hervdb4
160386402-MALR1026uL	3.91963642504151	5.75236660676375	1.2203893927532	4.71355015122379	2.43437774663835e-06	0.000385215579406494	hervdb4
160389302-HERV0416uL	1.64123633290283	4.1862999877321	1.00386228594184	4.1701935079715	3.04341108302181e-05	0.00313111329389335	hervdb4
160389401-MALR1045cL	2.15247368626418	4.60577644940567	1.07170506198412	4.29761565264857	1.72645186135773e-05	0.00197466488110864	hervdb4
160390201-MALR1014cL	4.27453087472746	5.72619957527133	1.06410641882259	5.38122830008604	7.39792988184062e-08	2.01035992764004e-05	hervdb4
160392202-MALR1022cL	50.0896623261095	2.38820570414327	0.36577295239084	6.52920257917648	6.61207704877398e-11	5.45017334314857e-08	hervdb4
160407202-HERV0602cL	2.00417882480408	4.30580696086842	1.06325516423354	4.04964594173621	5.12951805871903e-05	0.00479103123601855	hervdb4
160479301-MALR1017uL	2.08284152562001	-1.8567306276465	0.45895865588351	-4.04552916443473	5.22050655864485e-05	0.00484779284447668	hervdb4
160491102-MALR1041cL	5.95575377274198	4.48719744145511	0.776007390477703	5.78241585907169	7.36354019780697e-09	2.8142023341883e-06	hervdb4
160500801-HERV0813uL	17.05689651063	5.08391125868021	0.689175564800358	7.37680138173926	1.62137607707282e-13	3.77617400178395e-10	hervdb4
160504802-MALR1004uL	54.4446826297949	1.51339907546265	0.254840293405226	5.93861769361631	2.87435269625305e-09	1.26903037233299e-06	hervdb4
160508904-MALR1021cI	5.28088483297285	1.69845302896332	0.433393927516838	3.9189589911763	8.89322427097437e-05	0.00737083361869989	hervdb4
160512401-HERV0558cL	6.99218429728174	-1.05537001251512	0.263960338339619	-3.99821434975299	6.38221423291836e-05	0.00567595075117204	hervdb4
160627802-HERV0421uL	11.498827771321	-1.21819415701255	0.271751453062835	-4.48275121727087	7.36868172123298e-06	0.000984628390797947	hervdb4
160684301-MALR0820cL	3.02373527256021	4.04528160998185	0.886280561840889	4.56433525020499	5.01079515073677e-06	0.000710312962912041	hervdb4
160684302-MALR0820cL	11.7743906107654	5.71461348190387	0.889251528231335	6.42631842676714	1.30731407881364e-10	9.49088141485169e-08	hervdb4
160739801-HERV0812uL	4.4983568200349	-2.15704864068654	0.513170458090117	-4.20337649348425	2.62962660866841e-05	0.00277449992623932	hervdb4
160739802-HERV0812uL	5.22673836521518	-1.85512385055439	0.477625909345945	-3.88405196253858	0.000102729937532688	0.00823690917804839	hervdb4
160917301-HERV0749uL	9.2051999877628	4.23551069671559	0.686251874186427	6.1719477294498	6.74538029903775e-10	3.72735966778994e-07	hervdb4
160942102-MALR1023uL	10.2743040133855	1.46403235483902	0.321794071268238	4.54959393462115	5.37495362921847e-06	0.000755454195387361	hervdb4
160951202-MALR1004cL	8.15038913028969	7.19317410302108	1.52180972225061	4.72672371443592	2.28171384654483e-06	0.000364548959036827	hervdb4
160970701-MALR1022uL	4.70308661571675	6.38415751616821	1.60480759825662	3.97814512038929	6.94549782019842e-05	0.00604521357804177	hervdb4
161042701-MALR1023cL	4.73583376213924	4.80042820629867	1.01970930115033	4.70764383622209	2.50596450401154e-06	0.00039510213638441	hervdb4
161083602-HERV0899uL	3.41261730247077	5.82613109922536	1.22222637773947	4.76681832869693	1.8715792551821e-06	0.000309421359282178	hervdb4
161088902-MALR1042cL	1.72333301071174	3.18568121733424	0.776196786435896	4.10421850876516	4.05683892618569e-05	0.00394453416689537	hervdb4
161089601-MALR1004uL	7.55793541266129	3.77004031648813	0.639282962943094	5.89729514944655	3.6950856838126e-09	1.57333574723515e-06	hervdb4
161089602-MALR1004uL	5.43905511459484	5.74268897991174	1.07155687522346	5.35920128244632	8.35906830575236e-08	2.22792924997095e-05	hervdb4
161148701-HERV0753cL	5.11903921937296	3.08396524373328	0.66525509785288	4.63576341419528	3.55622530381695e-06	0.000533310849148901	hervdb4
161163501-MALR1126uL	8.09318482508366	3.20721174697453	0.518929000644631	6.18044422838272	6.39214757704062e-10	3.58352674020135e-07	hervdb4
161217601-MALR1018uL	6.06955571615983	1.68793931354255	0.41847557060949	4.03354325100543	5.49420625155426e-05	0.00504257988207977	hervdb4
161222001-HERV1035uL	2.62178018071064	2.18868435588063	0.485872299693399	4.50464938474936	6.64826169179049e-06	0.000902260372422814	hervdb4
161224501-MALR1134cL	3.45148594193676	1.44516914943569	0.376274756022608	3.84072842066732	0.000122669767438322	0.00944491572651135	hervdb4
170010902-HERV0415uL	3.62952846815949	6.00739848100755	1.4990376624077	4.00750336809997	6.13639867756833e-05	0.00550246271082626	hervdb4
170015201-HERV0900uL	3.57852407075791	4.45401428870852	0.998607014708073	4.4602273197636	8.18727666814184e-06	0.00107375236182108	hervdb4
170015202-HERV0900uL	1.24772361027693	3.50012823257503	0.888102267044274	3.94113196470485	8.10979921205019e-05	0.00683751448818603	hervdb4
170015801-MALR0818cL	2.17621543015046	3.49994883044174	0.855932082508769	4.08904970612067	4.33144037540252e-05	0.00416485574694426	hervdb4
170029002-HERV0758uL	4.24768379372267	-1.82343921163543	0.384756115285564	-4.73920787531105	2.14555308200957e-06	0.000345980404516246	hervdb4
170035101-HERV0761cL	39.869371269991	1.07258777657579	0.218157666939666	4.91657154030909	8.80730215266806e-07	0.000162656199734905	hervdb4
170063801-MALR1022uL	2.60829704713282	3.59386982185507	0.826912252004506	4.34613202687858	1.38559188417108e-05	0.00165346662876565	hervdb4
170067001MR41sLRp	3.99588938716926	2.74484429583787	0.516760567620266	5.31163650600925	1.08645143644054e-07	2.76722323430595e-05	hervdb4
170083002-MALR1014uL	12.0770800023018	-1.40643197469955	0.268540669416616	-5.23731462260414	1.62929813959634e-07	3.90108816729153e-05	hervdb4
170086902-HERV0759cL	1.76719895759677	4.46890553803155	0.889088804280786	5.02638827135676	4.99803454372972e-07	0.000102073034893827	hervdb4
170087201-HERV0541cL	3.06267982518121	3.0044727511215	0.68323640050591	4.39741317777684	1.09548683301204e-05	0.00136638015539333	hervdb4
170087202-HERV0541cL	10.7261411241493	6.63445341000373	1.04575506653063	6.34417524938611	2.23620158621186e-10	1.50974061176506e-07	hervdb4
170088401-HERV0912cL	2.42181648308505	3.43586825776155	0.726679647343924	4.72817460943064	2.26547325283915e-06	0.000362120925011627	hervdb4
170088601-MALR1127cL	2.50565119260879	4.76359299293587	1.19972981688414	3.97055480817135	7.17054578034325e-05	0.00620227684664877	hervdb4
170097502-HERV0741cL	1.99800206097862	4.29592046998205	1.05001836516432	4.09128126945644	4.2899644600989e-05	0.00413069774401643	hervdb4
170205901-HERV0758uL	2.08743111961923	4.24151089542179	1.06346513617459	3.98838734918851	6.65239795281958e-05	0.00585099435399496	hervdb4
170226102-HERV0557uL	15.4646258168057	-1.22176841937299	0.212477763383226	-5.75010015127746	8.91905995811222e-09	3.33163852170517e-06	hervdb4
170301201-HERV1031cL	2.73914099550381	2.65787016427503	0.573660199209094	4.63317860981019	3.60093605349235e-06	0.000538619322966774	hervdb4
170313001-HERV0933uL	25.2619349403036	1.39753856328704	0.227562610898483	6.14133647776829	8.18300370899907e-10	4.33937327177749e-07	hervdb4
170313201-MALR1003cL	2.50274507585785	4.89037159207899	1.16235792702562	4.20728544828961	2.58456590853838e-05	0.00273311158467783	hervdb4
170363002-HERV0473cL	2.7936737707608	3.39295824557122	0.76690890930204	4.42419980315412	9.68004021385447e-06	0.00123863110435538	hervdb4
170366803-HERV0815cL	7.84699409417222	1.47954857452821	0.348102981438758	4.25031859369039	2.13466664130829e-05	0.00234793032604375	hervdb4
170366804-HERV0815cL	6.44605352869187	1.64716170291103	0.349987085623947	4.70634994995464	2.52191454031445e-06	0.000396715677144116	hervdb4
170366901MR52sLU5	22.34599901832	1.69905323879987	0.286418520997711	5.93206484301847	2.99148427391916e-09	1.31239554075275e-06	hervdb4
170369301ERVIpol	71.9630793039507	-1.09843929040408	0.23771643800595	-4.62079652386759	3.82269552909378e-06	0.000567630210742885	hervdb4
170392401-HERV0911cL	3.15047587341992	5.39982124899855	1.06538247458875	5.06843446160775	4.01101041218399e-07	8.43065313892239e-05	hervdb4
170392402-HERV0911cL	2.59479822141944	5.42206158645792	0.948149600039522	5.71857182266587	1.07423109477058e-08	3.91987039439837e-06	hervdb4
170394103-HERV0769cI	16.32336453574	3.45058649578701	0.489028481915004	7.0560031233247	1.71359975353712e-12	2.65470261818058e-09	hervdb4
170463802-HERV0590cL	3.94490692738943	-1.50055270139629	0.383885816007892	-3.90885163979449	9.27358902430371e-05	0.00759740618061397	hervdb4
170464702-MALR1017uL	7.05418909488574	4.2239692230651	0.685390777972916	6.16286264539149	7.14414739574737e-10	3.90457313266772e-07	hervdb4
170471502-HERV0490uL	52.0016226337252	2.4318783221022	0.307169141429243	7.91706585754934	2.43180956804577e-15	1.11037704776743e-11	hervdb4
170476102-MALR1026cL	3.15569153757372	5.46806940913601	1.39545163114003	3.91849440504708	8.91037973045095e-05	0.00737900044598135	hervdb4
170611101-MALR1002uL	2.2070818063444	4.92803278324722	1.0871133680343	4.53313603544221	5.81143611887889e-06	0.000806996623438716	hervdb4
170615001-HERV0923cL	3.02926473505836	5.37826062727888	1.40111356501136	3.83856152819081	0.000123757204875101	0.0095097930105752	hervdb4
170644802-HERV0489uL	5.51717283142525	3.86486026644128	0.632329134153762	6.11210215960327	9.83272024550639e-10	5.05503789569723e-07	hervdb4
170646802HFRDsLU3	28.0519070202021	1.18371371263175	0.267878649403398	4.41884306669471	9.92306669272541e-06	0.00126459882618787	hervdb4
170646902-HERV0166uL	3.12662120086799	-1.25100860633861	0.327230593705139	-3.82301847811292	0.000131827896231319	0.00999714085450006	hervdb4
170647902-MALR1014cL	2.78672831941319	5.21883536558186	1.17974458719356	4.42369935173572	9.70250187071885e-06	0.00124104762225465	hervdb4
170685102-MALR1004cL	3.81989657514756	2.61878510461769	0.62054018424592	4.22017005683531	2.44118099936997e-05	0.00260818543842786	hervdb4
170685301-HERV0488cL	6.05496251710624	4.2738827064987	0.789241229959339	5.41517921804324	6.12273479468201e-08	1.70659552485988e-05	hervdb4
170685601-HERV0557uL	2.00467519879778	4.31035987295604	0.965603992443499	4.4639002186067	8.04810551126501e-06	0.00105910260694698	hervdb4
170686601-MALR1005cL	3.38393048069988	5.36959503252198	1.25032005925258	4.2945764108846	1.7502719274442e-05	0.00199684855136468	hervdb4
170687501-MALR1126cL	3.15991881576161	4.28471237436846	0.869446230403683	4.92809356638314	8.30358524465936e-07	0.000155253779719919	hervdb4
170689601-MALR1026uL	22.7043553804978	3.26788272171691	0.446163417751741	7.3244075863146	2.39956351719766e-13	5.15921797152377e-10	hervdb4
170694102-HERV0492uL	12.7259141692807	2.86348160522061	0.419545612872663	6.82519735009054	8.78045255014987e-12	1.02352089883961e-08	hervdb4
170767801-MALR1006cL	1.95464588522232	4.0111481944021	0.953559085491136	4.20650199388131	2.5935379634813e-05	0.00273975508093541	hervdb4
170768702-HERV1035cL	3.17521697258969	4.13797844496739	0.912290605959094	4.53581174456698	5.73823485040516e-06	0.0007977893661008	hervdb4
170799701-HERV0623uL	14.1198271490638	1.19431944849497	0.309475768181435	3.85916950950026	0.000113773004304766	0.00889022921725732	hervdb4
170807104XA34gag	11.400620364147	-1.25232116541791	0.223676575971537	-5.59880336140908	2.15836446133751e-08	7.0927616986112e-06	hervdb4
170807105ERVHpol	25.0095470528124	-1.00446788871855	0.188605211510574	-5.32576953029866	1.0052652831105e-07	2.59384541048068e-05	hervdb4
170807106ERVHenv	7.16262136680168	-1.06730674364815	0.258146818833551	-4.13449504615565	3.55735926425697e-05	0.00354938128775863	hervdb4
170807401-HERV0474cL	4.99949464791913	3.93820921915472	0.679484324911836	5.79587942615998	6.79640816815568e-09	2.63279529742917e-06	hervdb4
170812402-MALR0818uL	15.3907469369759	1.87550952004135	0.332675888312469	5.63764789072948	1.72388539070535e-08	5.84201863557197e-06	hervdb4
170816202HFRDsLU3	8.33903783029099	1.37857691302774	0.351434296216583	3.92271593259112	8.75563615754866e-05	0.00727755894465278	hervdb4
170838602-MALR1007cL	5.98533289008969	3.15523731370156	0.546245695178831	5.7762236692201	7.6395804168699e-09	2.91008473793874e-06	hervdb4
170864201-HERV0198cI	6.15060080837794	2.09621122880921	0.433689075233807	4.83344254793394	1.34192018676891e-06	0.000234714285893421	hervdb4
170864202-HERV0198cI	5.21948212601925	2.45620601125298	0.518198832002817	4.73989106027092	2.13833156247279e-06	0.000344976205862068	hervdb4
170877602-HERV0931uL	24.9555099384565	2.20020478631041	0.305529904264283	7.20127475445818	5.96522062250732e-13	1.08950045285394e-09	hervdb4
170881202-MALR1004uL	1.77152233971066	-1.87749991538595	0.484987708998339	-3.87123195196762	0.00010828668942242	0.00855787906248421	hervdb4
180045101-MALR1008uL	7.15289077577899	-1.27057647360832	0.292751805486765	-4.34011490209497	1.42408232344945e-05	0.00169070005766829	hervdb4
180127301HK08sLU5	7.34600167331005	-1.33306793557072	0.305853016652266	-4.35852472590233	1.30942130488063e-05	0.00157830976456991	hervdb4
180127302HK08sLR	21.9823612841096	-1.17917844012674	0.294022271221473	-4.01050721507595	6.05884488002455e-05	0.00545547574018194	hervdb4
180147701-HERV0741cL	4.04592561588723	5.34794801765474	1.19212914881315	4.48604752511838	7.2556563853613e-06	0.000971770698127394	hervdb4
180149402-HERV0403cL	2.3989911885544	3.13964900388103	0.732223991834418	4.28782590968559	1.80430413105211e-05	0.00204952412293847	hervdb4
180207201HR46sLU3p	4.87758166365951	2.05646208969517	0.514597703156663	3.99625197912923	6.43532359772676e-05	0.00571732205551239	hervdb4
180383805-HERV0539cL	1.6773154604082	4.0552426275886	1.01185265382839	4.00774026953965	6.13024834143901e-05	0.0055012122561318	hervdb4
180383806-HERV0539cL	3.67822724678599	4.51266557428694	0.864681646455331	5.21887516959117	1.8001303352214e-07	4.23800019625869e-05	hervdb4
180585702-HERV0116cI	2.589575247276	3.33413307240762	0.756088626256128	4.40971197902687	1.03508193901921e-05	0.00130758694750072	hervdb4
180836102-MALR1017cL	9.66678322394673	2.7799283253339	0.531581771679918	5.22954035189864	1.69932009025371e-07	4.03350244678414e-05	hervdb4
180980602-MALR1025uL	13.8231265133431	2.81066703832386	0.445959402212098	6.30251772780677	2.92849032026948e-10	1.89952282418676e-07	hervdb4
181112001-MALR1127cL	8.79627309203979	-1.34477263438336	0.336173108411413	-4.00023856975974	6.32786584356164e-05	0.0056377304365411	hervdb4
181112002-MALR1127cL	11.5664902118659	-1.35364173374451	0.351812963074762	-3.8476175576761	0.000119272049503255	0.00923260910520175	hervdb4
181147801-MALR1007uL	8.5355129012683	-1.27346191491298	0.324568560445177	-3.9235528948531	8.72525974447411e-05	0.00726100632260769	hervdb4
190010902-MALR1003uL	3.96861407734378	-1.47235646722022	0.375055691224706	-3.92570090701035	8.64775558838416e-05	0.00721207436741425	hervdb4
190011701-MALR1014cL	7.44810637060651	3.99523674877342	0.623155034590398	6.41130461442795	1.44279584388281e-10	1.03660251292798e-07	hervdb4
190011702-MALR1014cL	28.1265530092341	1.40033480109776	0.238825291709296	5.86342757534358	4.53408663298213e-09	1.85108087456172e-06	hervdb4
190015402-MALR1007cL	6.25362885027719	-1.20084128899399	0.30096632328074	-3.98995235049555	6.60865702409026e-05	0.00582952760676106	hervdb4
190016802-MALR1127uL	10.4154703492415	2.99602043539484	0.458645173100001	6.53232740932301	6.47554002152797e-11	5.40178340930441e-08	hervdb4
190021101-MALR1009uL	5.86484267851074	2.8139339648014	0.598643563010876	4.70051653215601	2.59504245027029e-06	0.000406927985130048	hervdb4
190026201-MALR1010cL	5.21644301343603	-1.36875118250413	0.345564688081285	-3.96091160269872	7.4664171554496e-05	0.00640701305955519	hervdb4
190026402-MALR1004uL	5.49711879111506	2.10095416482753	0.45259287600321	4.6420398468946	3.4498630779074e-06	0.000519155023978936	hervdb4
190032001-MALR1022uL	13.5867272659689	2.95358369290037	0.437045712053733	6.75806583027918	1.39845992937856e-11	1.52129644104372e-08	hervdb4
190032002-MALR1022uL	19.5239935219521	4.26544085675536	0.543765327455352	7.84426781441962	4.35486831252487e-15	1.78475418839847e-11	hervdb4
190048001-MALR1127cL	4.35292338990135	5.19951415054406	0.848904985117546	6.12496597581424	9.07029867490881e-10	4.75464508484419e-07	hervdb4
190054901-HERV0534uL	2.05396443938145	4.3337678159162	1.06411538536965	4.07264839462005	4.6481566589885e-05	0.00441072825759417	hervdb4
190074602-HERV0425uL	8.28770220064544	3.09542623624687	0.520330309741541	5.94896391444972	2.69845116696238e-09	1.20516927150487e-06	hervdb4
190086101-MALR1126uL	3.19513795947337	2.18787299653152	0.568585570123936	3.84792212727914	0.00011912390365617	0.00922319880561452	hervdb4
190086102-MALR1126uL	38.0991823870915	1.94759097831091	0.29872161839993	6.51975236590833	7.04235590922461e-11	5.76376968778095e-08	hervdb4
190086202-HERV0203cL	12.5390077067626	-1.00690003619902	0.215535622054689	-4.67161774281345	2.98836715480702e-06	0.000459266240062504	hervdb4
190087402-MALR1127uL	3.67596616212855	2.03516741627146	0.493831780731864	4.12117546030617	3.76944196670428e-05	0.00372245802870153	hervdb4
190097101-MALR1019uL	4.60585383159438	2.88371074518325	0.59282029977503	4.86439271104177	1.14808762505901e-06	0.00020510509202921	hervdb4
190097601-MALR1002cL	2.21177349637535	3.78801896090907	0.742676538930032	5.10049632962209	3.38763950696499e-07	7.29800277194735e-05	hervdb4
190097602-MALR1002cL	4.25045490335959	3.95124803282278	0.723129745745286	5.46409279395701	4.65280114546882e-08	1.3556801456764e-05	hervdb4
190098302-HERV0561uL	13.2235766405004	2.35693093520447	0.427979310145991	5.50711419764772	3.64763654746395e-08	1.09974181989656e-05	hervdb4
190103501-HERV0955uL	3.29542078574018	5.32103318366548	1.18747289147956	4.48097234205964	7.43037410457846e-06	0.000991726316065699	hervdb4
190112201-HERV0781cL	76.8024647524742	-1.12996057616653	0.248512526750717	-4.5468958484334	5.44429225228097e-06	0.000762014939725019	hervdb4
190115407HK07pol	8.56759306902793	-1.10635577537743	0.278868731149555	-3.96729949183186	7.26916229330035e-05	0.00626874925204048	hervdb4
190121101-HERV0473uL	3.50262802042715	-1.32741383823134	0.339243492959738	-3.91286455239062	9.12076982927183e-05	0.00750198991740676	hervdb4
190127702-MALR1004cL	56.3618333925666	1.20549911339222	0.267592808806632	4.50497574567985	6.6380523842747e-06	0.000901227284190534	hervdb4
190143401-MALR1018uL	7.97875326870963	3.58410686351415	0.578859491195423	6.19166985776201	5.95301389744858e-10	3.38103908787661e-07	hervdb4
190147901-MALR1017uL	5.27704155655024	-1.14734792336284	0.298810866548779	-3.83971284784431	0.000123178298016204	0.00947160048251343	hervdb4
190147902-MALR1017uL	10.3251055466348	3.58854703453894	0.557019757373696	6.44240529538602	1.17594743576541e-10	8.75702315792518e-08	hervdb4
190153302-MALR1041uL	5.97019752280964	3.83628500919824	0.680242895742158	5.63958114551535	1.70464306445601e-08	5.78557811088449e-06	hervdb4
190172201-HERV0912uL	8.9279832215377	1.8464679378019	0.379506020616913	4.86545097440179	1.14196116429465e-06	0.000204164535411401	hervdb4
190175302-MALR1022uL	5.47015118167989	-1.77558805571022	0.318101122272916	-5.58183524479002	2.37993775017531e-08	7.64709257468366e-06	hervdb4
190178601-MALR1127uL	2.22952007741582	-1.70261414471864	0.427688590498869	-3.98096695245638	6.86354921748448e-05	0.00599644725440953	hervdb4
190186602-MALR1020uL	3.6300414397384	-2.07827903958704	0.447352137360664	-4.6457340113511	3.38869396355036e-06	0.000511502644293713	hervdb4
190189401-HERV0752cI	6.7813850823452	-1.29282708127309	0.310424446701514	-4.1647076930001	3.11751719759628e-05	0.00319221250489779	hervdb4
190189402-HERV0752cI	6.47313255692715	-1.2012505246101	0.309131179837403	-3.88589247206296	0.000101954630533747	0.00818419983525815	hervdb4
190191301-HERV1034cL	7.37590447711623	5.53523094787893	0.927148912695782	5.97016387775796	2.37015396685705e-09	1.08222477576149e-06	hervdb4
190191302-HERV1034cL	2.65572882484254	4.558715426005	0.894846616246749	5.0944098611286	3.49829225035088e-07	7.48906463119534e-05	hervdb4
190191501-HERV0173cL	8.24296181312163	1.78922195676946	0.403907103859114	4.42978580885161	9.43267268027431e-06	0.00121189414050677	hervdb4
190194101-MALR1004uL	1.98178025355051	3.64005159222968	0.82601893979519	4.40674107682352	1.04937502623862e-05	0.00132227349893001	hervdb4
190194102-MALR1004uL	2.8763514218445	4.46629484889062	1.05330224046917	4.24027850439318	2.23242627331953e-05	0.00243080189948963	hervdb4
190198302-HERV0926uL	7.53900430901377	6.91535186264122	1.36059923240172	5.08257810085214	3.7234613014697e-07	7.89801675327637e-05	hervdb4
190200404HRLQ5LU3p	20.3361767445706	1.31806819550137	0.268178981934947	4.9148825384873	8.88357054560341e-07	0.000163716232115523	hervdb4
190200702-HERV0955uL	2.04072040264113	3.92394095479863	0.914117850030312	4.2925985469691	1.76594129454568e-05	0.00201121413860598	hervdb4
190202102HRLQuLU3p	4.51768388521484	2.08001117164841	0.455704986907703	4.56438097323189	5.00970328984152e-06	0.000710312962912041	hervdb4
190226502MR413LRp	17.0404654183763	7.17235771915546	0.924785928876633	7.75569512380876	8.78608717449206e-15	3.11117139927779e-11	hervdb4
190228401-HERV0572uL	2.82727588607865	5.00949235581254	1.06861001428361	4.68785832890669	2.76079024175633e-06	0.000429041392608276	hervdb4
190230005HK03pol	8.66922234321152	1.17991405075374	0.290774174543225	4.05783647260717	4.95294281820053e-05	0.00465035231810592	hervdb4
190241401-HERV0871uL	2.19342742174041	4.30931551430799	0.869376214990179	4.95679021349425	7.16672863852369e-07	0.000137175850642057	hervdb4
190359601-HERV0911cL	3.22852665702638	2.98191203778237	0.613796869103461	4.85814149253952	1.18492723202936e-06	0.00021097662804455	hervdb4
190362801MR52env	6.17268718617972	2.73227364095719	0.493196222004425	5.53993221978224	3.0258873900595e-08	9.41742997397709e-06	hervdb4
190391901-HERV0922uL	12.5135438382706	1.60395951255443	0.305582241021073	5.24886363551415	1.53040304140866e-07	3.69575827021318e-05	hervdb4
190397901-HERV0489uL	15.2286157951773	-1.14051598966274	0.274887412984429	-4.14902951459384	3.33887764984285e-05	0.00336818988967577	hervdb4
190406402-MALR1012cL	1.77868894803809	2.5985925118895	0.66238833405546	3.92306503343691	8.74295388859682e-05	0.00727050049945092	hervdb4
190410601-HERV0183cI	5.60526453373521	2.14072124953127	0.452405122677828	4.73186783752612	2.2246324413429e-06	0.000356578267803609	hervdb4
190412301HRRBpol	4.0216331166375	1.91482250642499	0.46279702105273	4.13749963659947	3.51111005188939e-05	0.00351131242134483	hervdb4
190425201-MALR1002cL	2.45194754273786	-1.69277102093016	0.436262276561026	-3.88016821961769	0.000104384245457134	0.00831766265408375	hervdb4
190425301-HERV0740uL	2.72094123198429	-1.6517516878806	0.420679184922305	-3.92639271701942	8.62293263660225e-05	0.00719829223852228	hervdb4
190426201-HERV0409cL	2.44484807673801	-1.71713098099295	0.437679959336995	-3.9232570383028	8.73598606227821e-05	0.00726644746723822	hervdb4
190427001-HERV0476uL	19.6228316383161	1.38812554708471	0.264943566607071	5.23932535845789	1.61164680593138e-07	3.86238725548556e-05	hervdb4
190435201-MALR1023uL	2.90106214456871	5.82297014132901	1.45287414700994	4.00789714189137	6.12617889944387e-05	0.00550040517900391	hervdb4
190441002-MALR1024uL	8.11421259429993	-1.17364788084813	0.272414893962224	-4.30831025344336	1.64506519056064e-05	0.00189930444747447	hervdb4
190450801-HERV0740uL	175.214441051639	2.3399554272416	0.330439849590815	7.08133546888844	1.4277181027936e-12	2.27269144968548e-09	hervdb4
190450802-HERV0740uL	1342.53576505478	2.20433426260505	0.291924630141655	7.55103898405355	4.31799557007764e-14	1.23837258076723e-10	hervdb4
190471101-HERV0464uL	3.96213316629301	2.70030671666202	0.593889081324165	4.54681993924065	5.44625538862805e-06	0.000762014939725019	hervdb4
190471901-HERV0490cL	16.9847268697758	1.12781571539023	0.254718571908542	4.42769330457451	9.52462012290114e-06	0.00122054419314961	hervdb4
190481602-HERV0491uL	6.16479401141464	1.90908418558669	0.470933329749678	4.05383111575784	5.03855976449229e-05	0.0047179735819593	hervdb4
190510501-HERV0707cI	6.45366296122754	4.60189018241835	0.727995940228804	6.3213129745916	2.59350138332471e-10	1.71755124053691e-07	hervdb4
190516602-HERV0911uL	2.6618306900921	2.82663854258649	0.702900767779239	4.02139060328108	5.78555759715314e-05	0.00526403827310981	hervdb4
190528801-MALR1023cL	6.2656122284948	2.24003116993736	0.485693482590156	4.61202641219621	3.9876231004398e-06	0.000589095346238663	hervdb4
190550101-MALR1001cL	26.4059984021901	2.77323118529246	0.387718488639601	7.15269265343259	8.50919832740115e-13	1.46789844061703e-09	hervdb4
190550102-MALR1001cL	16.5857472923056	1.39953344491586	0.273773194926468	5.11201779740254	3.18735789487739e-07	6.94961871899717e-05	hervdb4
190553001-HERV0628uI	4.17135787452133	2.48418198987944	0.51624947664856	4.81197967697032	1.49442553432884e-06	0.000256603438358631	hervdb4
190584602-MALR1004uL	3.31868747022635	2.62834702148992	0.613588268483905	4.28356791759434	1.83919921378591e-05	0.00208098764645578	hervdb4
190616302-HERV0509uL	2.79965308160593	-1.64790824183025	0.410331775644082	-4.01603858059393	5.9184571059964e-05	0.00535686746197932	hervdb4
190616402-HERV0746uL	1.24845097053811	-2.00807255095642	0.520227820861786	-3.85998685658514	0.000113393123979054	0.00886653489932655	hervdb4
190630102-HERV0892cL	12.9150350942777	2.03900487387512	0.382414557653486	5.33192273428749	9.71782884460818e-08	2.52038936147678e-05	hervdb4
190634501-HERV0557uL	4.78439557465385	-1.7104948506331	0.342230310888633	-4.99808110564971	5.79036314997776e-07	0.000115208679052285	hervdb4
190635403HE41sLU3p	5.32246379158695	1.63696297996926	0.39589179329222	4.13487475038658	3.55148276079316e-05	0.00354453709419166	hervdb4
190636001-HERV0909cL	6.41361208271025	2.68969196413105	0.54663664294681	4.92043846462881	8.63505464169046e-07	0.000160242602233124	hervdb4
190672302-MALR1133cL	78.9659820899885	2.73899488816763	0.351702102374327	7.78782631572796	6.81718033047699e-15	2.5437612024539e-11	hervdb4
190672402-MALR1014uL	3.97364089940562	-1.45697113130281	0.353696306830152	-4.11927154218905	3.80072042430287e-05	0.00374907902683793	hervdb4
190706701-HERV0763cL	4.429808060535	2.28879813215658	0.503733211293893	4.54367129432969	5.52828420797882e-06	0.000771381256876884	hervdb4
190711505HK01pol	24.6103417441862	2.02519861429235	0.299304287984008	6.76635349240489	1.32068642304033e-11	1.45033102064384e-08	hervdb4
190719510HK063LU3p	11.0801971696729	1.46505658378182	0.315458287988108	4.64421649253689	3.41369457483795e-06	0.000514604818140862	hervdb4
190719512HK063LU5p	2.02687006592122	1.8636890261531	0.466569003330529	3.99445529567856	6.48431541152768e-05	0.00574466973221428	hervdb4
200058502-MALR1026uL	6.00393914041557	2.83173568292744	0.677630432163064	4.17887914786864	2.9294929515489e-05	0.00303596168780247	hervdb4
200100601-HERV0417uL	3.42105278443718	1.79667485898854	0.407858850882823	4.4051388246193	1.05716153760152e-05	0.00133087081801611	hervdb4
200146401-MALR1046uI	9.12033477351599	6.4801119351332	0.863474056243704	7.50469789830522	6.15704290255457e-14	1.66923205315975e-10	hervdb4
200159702-HERV1029cL	4.06531800201709	5.94518216633706	1.1698935028694	5.08181484191109	3.73845734619189e-07	7.92014327396527e-05	hervdb4
200504502-HERV0471cL	2.58882640312371	-2.08384802540808	0.463496186724932	-4.4959334835796	6.92653888820726e-06	0.000933092983301896	hervdb4
200600002-MALR1026uL	8.86180023122017	-1.42833686309978	0.341538314493764	-4.18206919249131	2.88868022900817e-05	0.00300488553078662	hervdb4
200652601-HERV1030cL	4.48941852570645	2.23686527434516	0.54551109529357	4.10049455207026	4.12268142037816e-05	0.00400150314221385	hervdb4
200708602-MALR1044uL	3.67678573381965	-1.88022492289414	0.410567612646718	-4.57957438672111	4.65923063466088e-06	0.000670056450410285	hervdb4
200721101-MALR1023uL	8.14251729535084	-1.12186696196595	0.279952566190599	-4.00734659171565	6.14047205238993e-05	0.00550469287424529	hervdb4
200754202-HERV0907uL	7.3784908460359	1.62461723510043	0.390592644349352	4.15936464396742	3.19134072379975e-05	0.00325340498816976	hervdb4
200791002-HERV0585uL	8.12976296910998	-1.14289062834194	0.288766328637007	-3.95783896874835	7.56309156377593e-05	0.00648195612363923	hervdb4
200808601-HERV0490cL	39.0434926947289	-1.13718600979461	0.227588722258799	-4.99667118171823	5.83283994285845e-07	0.000115795887698555	hervdb4
200977002-HERV0417uL	4.69207126252347	-1.13967769519882	0.293812581980094	-3.87892746974338	0.000104918028943876	0.0083481737618198	hervdb4
201042302-MALR1015uL	6.54692402084616	5.50871834698889	0.91618117230518	6.0126954291459	1.82463657777991e-09	8.62650388584721e-07	hervdb4
201042801-HERV0507uL	6.23178742170914	1.54346144077861	0.399211852469698	3.86627158294547	0.000110511870430505	0.00868822593493292	hervdb4
201045001-MALR1022uL	16.0976598160608	-1.04819607614676	0.229551355730767	-4.56628135699685	4.96452332581183e-06	0.00070519397647287	hervdb4
201045102HK08sLR	3.45257810038923	-1.53259780425586	0.343673016684464	-4.45946504337574	8.21644721717964e-06	0.00107717095327	hervdb4
210031502HR46sLU3p	18.8419182130663	2.41205694848607	0.497114220795498	4.85211818045805	1.2214979458077e-06	0.000216554571166953	hervdb4
210354001-MALR0818uL	11.300763377293	-1.05653561576586	0.240375139687438	-4.39536142189944	1.10588596805959e-05	0.0013769807988376	hervdb4
210442501-HERV1036uL	3.00913530566631	4.43417224514473	1.01338612925446	4.37559989932653	1.21098963734622e-05	0.00148651441086624	hervdb4
210448302-HERV0867cL	5.80930596662674	1.7530460627448	0.392748717704636	4.46353096450633	8.06199414263812e-06	0.00106052813016614	hervdb4
210448701-MALR1020uL	1.81233159072101	4.51062099822012	0.941114454034512	4.79285062394197	1.64428054165319e-06	0.000276318757174087	hervdb4
210465202-MALR1046cL	25.7406442678529	4.42751559021459	0.566898367296809	7.81006939802402	5.71565058251311e-15	2.17960996169637e-11	hervdb4
210491902-MALR1003cL	3.40096860416281	5.38625892987631	1.32113940319082	4.07698000443208	4.56244145793971e-05	0.00434966548198344	hervdb4
210609801-MALR1017cL	5.70386048548524	5.8511918455728	1.01090626687735	5.78806565681591	7.12015822803428e-09	2.73928748147723e-06	hervdb4
210655101-HERV0546uL	38.3513669841649	-1.04306461777483	0.243318322129147	-4.28683137647642	1.8123976174789e-05	0.00205468219933854	hervdb4
210676202-MALR1012uL	9.08126401647128	-1.47411822733775	0.336325144068632	-4.38301522599492	1.17047929021283e-05	0.00144619346137206	hervdb4
210676301-HERV0534uL	13.6158800171705	-1.33021867273789	0.332213181076401	-4.00411166236046	6.22509579250391e-05	0.00555901374656383	hervdb4
210676302-HERV0534uL	12.0161699361483	-1.381665145592	0.342193166384697	-4.03767603014818	5.39833343343465e-05	0.00497432200762213	hervdb4
210677902-MALR1002uL	3.42893409761554	-1.73615001581357	0.426291725048059	-4.07268054667926	4.64751483592311e-05	0.00441072825759417	hervdb4
220007002ERVH5LR	7.04731491202563	2.63115759155099	0.557645048067957	4.71833758887848	2.37779684347642e-06	0.000377467090861476	hervdb4
220007005ERVHpol	20.0135191683404	1.9503360872102	0.372595460349681	5.23446014446823	1.65467769530121e-07	3.94924597526491e-05	hervdb4
220007007ERVH3LU3II	11.5631982309844	2.70849446115004	0.4866412461518	5.56569029560878	2.61116649619352e-08	8.25850874084108e-06	hervdb4
220014502-MALR1126cL	10.13541967492	5.11765446904245	0.771477989214813	6.63357158672932	3.27659949580279e-11	3.04966971397405e-08	hervdb4
220031807-HERV0766cI	6.41954582085932	1.78956775471942	0.403129329660321	4.4391901631849	9.0298006596678e-06	0.00116814609149763	hervdb4
220039401-MALR1133cL	13.0165255456204	-1.19813464918659	0.295625755156755	-4.05287640974069	5.05917322971746e-05	0.00473472031870699	hervdb4
220108002-MALR1131uL	14.3003964977291	5.95923072475305	0.837075565124105	7.11910725033472	1.08628359839794e-12	1.7950577824574e-09	hervdb4
220110801-HERV0426uL	8.15719198310757	6.23213440615861	0.959518381278229	6.49506515743495	8.29974815530374e-11	6.50153183939843e-08	hervdb4
220111102-HERV0491cL	30.8397864693644	1.37329535479595	0.269966386401975	5.08691238601512	3.63939856729011e-07	7.74337272115889e-05	hervdb4
220130401-MALR1041uL	4.29579254782566	3.21110139644984	0.606804979848454	5.29181780487661	1.21106512737689e-07	3.0322064971308e-05	hervdb4
220130402-MALR1041uL	4.72101217667044	4.50138900692431	0.804653618809384	5.59419469657621	2.21648120009922e-08	7.24941853023968e-06	hervdb4
220140001-HERV0972cL	4.47758390372936	4.18147922876955	0.805316116795578	5.19234514442356	2.07661575770982e-07	4.78451642768276e-05	hervdb4
220158201-MALR1022uL	29.3494890446904	1.46210181997872	0.244025376386496	5.99159743805904	2.07789766593709e-09	9.62713014730961e-07	hervdb4
220236901-MALR1127uL	2.32527405543655	4.87409988806478	1.18316084415714	4.11955814134214	3.79599633818001e-05	0.00374548379094464	hervdb4
220240202-HERV0754uL	4.37793587298842	-1.50506323269759	0.361559213512917	-4.16270192114415	3.14503813135909e-05	0.00321659632285362	hervdb4
220240602-HERV0755cL	41.8412973253643	1.43456351807877	0.309492340214564	4.63521493644793	3.56566789983976e-06	0.000533804173685243	hervdb4
220246602-HERV0552uL	86.6005678351375	1.37897573193481	0.235470187805854	5.85626462858975	4.73393702330205e-09	1.92361923398862e-06	hervdb4
220249302-HERV0552uL	7.54240543508429	1.56317859180914	0.375946742647832	4.15797881582777	3.21075789976552e-05	0.00326737638420818	hervdb4
220250701-HERV0552uL	23.7796924205226	1.7891783805814	0.293739041314289	6.091047252609	1.1217443202381e-09	5.68274035049672e-07	hervdb4
220263302-MALR1022uL	61.0924536472323	2.04676056790698	0.254730398203297	8.03500713830582	9.35734555809268e-16	4.57350148671735e-12	hervdb4
220267701-MALR1023uL	4.66975747569252	4.09156777108985	0.7236220249137	5.65428860678725	1.56493067498218e-08	5.38752225032061e-06	hervdb4
220268902-MALR1004uL	9.83739862698165	1.03002904494147	0.249829590155754	4.12292652883634	3.74089044755776e-05	0.00369952636965373	hervdb4
220273802-MALR1013uL	6.65728493074976	-1.29359666048334	0.283627939281224	-4.56089292106271	5.0936552521996e-06	0.000720293498621966	hervdb4
220277901-HERV0899uL	71.219955904574	1.35223783796457	0.235694423135169	5.73725003747361	9.62261452794576e-09	3.55616580776117e-06	hervdb4
220278001-MALR1127uL	29.9794538177392	1.02263956654962	0.212607046723545	4.80999845635112	1.50931461430279e-06	0.000258486030861786	hervdb4
220278101-HERV0794uL	31.3889477955953	1.39354161026644	0.278403228210419	5.00547935174512	5.57231862126017e-07	0.000111581419962476	hervdb4
220279401-HERV0484uL	8.22278956552622	2.20025430695537	0.385998004118396	5.70017016533717	1.1968789533043e-08	4.30405113342652e-06	hervdb4
220279802ERVH3LU3I	11.9929972113317	1.07948103286898	0.273600911371886	3.94545846889275	7.96474366593112e-05	0.00675611182339628	hervdb4
220282202-HERV0615uL	26.7047907244425	-1.02069293555991	0.244848609124124	-4.1686695269013	3.06382837411837e-05	0.00314712758583461	hervdb4
220291801-MALR1003uL	2.25717992331162	3.653569366926	0.92166634080811	3.96409113055227	7.3676105482797e-05	0.00633632766409918	hervdb4
220292202-HERV0857uL	45.3009661626895	1.4953715324354	0.221607839031051	6.74782777980105	1.50074926286203e-11	1.59148349252822e-08	hervdb4
220304101-HERV0531uL	3.26301436119802	-1.61290329816099	0.392599418919128	-4.10826715587481	3.98638826492555e-05	0.00389458461625694	hervdb4
220336401-MALR1003cL	2.65689136368657	4.16372260936276	0.840269871279753	4.95522064003235	7.22482573708962e-07	0.000137983435733893	hervdb4
220336702-MALR1017cL	4.7115007875924	-1.20538229809828	0.301925662997129	-3.99231481727257	6.54314260484439e-05	0.0057834980813375	hervdb4
220337001-HERV0462uL	2.49714157744465	3.79779623443011	0.971976082213736	3.90729391795361	9.33355896980343e-05	0.00763664220633759	hervdb4
220339002-HERV0749uL	4.48895673988705	-2.10737243873277	0.545007026614154	-3.86668856698011	0.000110323166765009	0.00868125744462438	hervdb4
220339003-HERV0749uL	8.50127872316585	-2.60977565738488	0.519923345447047	-5.01953928447069	5.17955526983681e-07	0.000105234734762223	hervdb4
220364301-MALR1133cL	15.563411218334	7.04956496976696	1.14210064008874	6.1724551430242	6.72376079631368e-10	3.7213388700746e-07	hervdb4
220418302-HERV0933uL	8.06055789824122	-1.12396912065594	0.271535033115845	-4.13931531323409	3.48343901371524e-05	0.00348866668553958	hervdb4
220419302-MALR1126cL	2.97408305118076	4.10437579225367	0.842382226941128	4.87234376627051	1.1028205928639e-06	0.000197880456119769	hervdb4
220420702-MALR1025cL	9.22399862673979	1.51933423988317	0.312516397177043	4.86161447401576	1.16432216523436e-06	0.00020761768286465	hervdb4

## Sheet: res_vargiu_2nd
ID	baseMean	log2FoldChange	lfcSE	stat	pvalue	padj	source
1058	16.3203485223463	3.78060573531161	0.513870157370755	7.35712257480623	1.87916784130263e-13	4.26214917835841e-10	vargiu
1278	13.4368767899724	3.03907268217407	0.488606867607728	6.21987303832567	4.97557325093601e-10	2.94645636440241e-07	vargiu
1350	15.3906742653834	-1.2675820919238	0.313947896862584	-4.03755560903989	5.40110441863468e-05	0.00497555416871411	vargiu
1405	19.584063825783	1.29820832325807	0.317547981281846	4.08822729093597	4.34682151794518e-05	0.00417475266197999	vargiu
1638	29.448037014418	1.35174381153135	0.286230965437521	4.72256315617401	2.32890734089894e-06	0.00037089372438676	vargiu
1874	6.36751345818604	4.76406451665182	0.877417897685823	5.42964137068206	5.64674078416756e-08	1.59571008706989e-05	vargiu
1892	48.6113938544019	1.7919928608121	0.266448690511419	6.72547069896484	1.75025712151886e-11	1.79166438439373e-08	vargiu
2371	10.6304181436056	3.13614759403719	0.540586793854038	5.80137663311835	6.57726786320975e-09	2.56166497630869e-06	vargiu
2476	46.3085336000869	1.57995034783377	0.268294215726268	5.88887219784769	3.88839989588093e-09	1.64154809229757e-06	vargiu
2550	26.4201612710217	1.06941238490771	0.23243904595929	4.60082935074087	4.20812080531371e-06	0.000615390328419771	vargiu
2909	70.3405047053986	-1.29042003908322	0.259112366951832	-4.98015611629645	6.35330011432674e-07	0.000124279718470894	vargiu
3107	198.122813710536	-1.05743073053876	0.274869649592422	-3.84702615260259	0.000119560211435007	0.00924876636208423	vargiu
3200	14.4113525783611	3.96936263709174	0.570373760617071	6.95923079069661	3.42135631044199e-12	4.69280263576908e-09	vargiu
3503	80.5989340297771	2.29008349846423	0.374289238759548	6.11848608325989	9.44685307681126e-10	4.9075553214297e-07	vargiu
4426	36.8550382044513	1.22618525076141	0.213365892989549	5.74686625674267	9.09125813828517e-09	3.38503047118854e-06	vargiu
4481	5.46067008769902	-1.27411489093984	0.329768362824951	-3.86366624143435	0.000111697814673931	0.00875567554735653	vargiu
4485	64.6557987228847	-1.10778176363633	0.232809820757603	-4.75831199917348	1.95218594443169e-06	0.000321065197363358	vargiu
4488	3.41297302184056	-1.85635636417304	0.456837003840545	-4.06349824678604	4.83426856170409e-05	0.00455494943329502	vargiu
4713	592.22015869179	1.53721623180007	0.235185194991403	6.53619472882324	6.31037445135311e-11	5.29650698580469e-08	vargiu
565	130.531351610853	2.302805951501	0.323994470399459	7.10754707838635	1.18123450555123e-12	1.92981539120916e-09	vargiu
6072	52.0995300724513	1.1850477176981	0.23246856084925	5.09766874870695	3.43861845694622e-07	7.39324273190505e-05	vargiu
6262	93.1004172121393	1.93163220233181	0.340512832433619	5.67271485343618	1.40552073265815e-08	4.93168659905998e-06	vargiu
930	3.60786370133414	-1.55271070798051	0.355734779126373	-4.36479871828591	1.27239864773e-05	0.00154495373945159	vargiu

## Sheet: res_hervdb4_3rd
ID	baseMean	log2FoldChange	lfcSE	stat	pvalue	padj	source
190120702-HERV0971uL	10.4153059709176	-1.02986975966271	0.209279031004587	-4.92103654493764	8.60870523889425e-07	0.000158230555720396	hervdb4
022640902-MALR1042uL	7.91878389273094	-1.05744962620168	0.246839898076221	-4.28394937140654	1.83604709565043e-05	0.00228203819173572	hervdb4
070077302-HERV0949cL	13.7250590682252	-1.06824710080776	0.247138383531777	-4.32246535540847	1.54295317511336e-05	0.0019627405088997	hervdb4
170083301-MALR1018cL	7.94104276791563	-1.07088748382797	0.273604371557792	-3.9139999033304	9.07796714653766e-05	0.00903695703177094	hervdb4
050900901-HERV0751uL	118.784198899651	-1.08611272183948	0.277518030892548	-3.91366542327482	9.09055727554909e-05	0.00904675992475206	hervdb4
190183201-HERV0570cL	5.4129423837079	-1.0865627428335	0.27815947967871	-3.9062581799784	9.37363584115456e-05	0.00928321663697904	hervdb4
100232601-HERV0568uL	4.60337688746142	-1.10644569707151	0.263356740674898	-4.2013190709911	2.65364278438933e-05	0.00313540047340411	hervdb4
141305902-MALR1018uL	5.67185369725352	-1.11390260776699	0.255785500861035	-4.35483091894313	1.33169666483366e-05	0.00173145513911794	hervdb4
021405701-MALR1003cL	19.2740902220193	-1.14533583228275	0.292296254769003	-3.91840748417351	8.9135928688079e-05	0.00891410662055826	hervdb4
120177801-HERV0394uL	7.08823420622095	-1.14972176637752	0.269800285652556	-4.26138083433354	2.03167678150453e-05	0.00249922891427757	hervdb4
011792601-MALR1003uL	6.37878192717215	-1.15219900533008	0.293637629108384	-3.92388063079203	8.71339216224609e-05	0.0087491937156905	hervdb4
200977002-HERV0417uL	4.69207126252347	-1.16242311415888	0.290929796053852	-3.99554507625513	6.45455741223151e-05	0.00679157220495021	hervdb4
220273802-MALR1013uL	6.65728493074976	-1.16762776978169	0.284017489129926	-4.11111221833084	3.9375775513411e-05	0.00442063462266706	hervdb4
032872101-MALR1019uL	5.84553359625167	-1.19946132787512	0.299916499948217	-3.99931757033112	6.35253926167749e-05	0.00670659621109621	hervdb4
140384801-HERV0938cL	6.68632191465679	-1.23276316189183	0.2872927949785	-4.29096442179863	1.77898818065342e-05	0.0022190671403679	hervdb4
013068301-HERV0871uL	5.53974228075856	-1.25605197140844	0.322940348442394	-3.88942409168328	0.00010048239151439	0.00984177236898772	hervdb4
071071801ERVH5LU3I	6.33007469794637	-1.27139499557719	0.308149135828634	-4.12590803527106	3.69274821670987e-05	0.0041795743188606	hervdb4
111757102-MALR1042uL	7.58878399419044	-1.31774638583315	0.264956392927476	-4.97344627647405	6.57730075021457e-07	0.000124588149909359	hervdb4
050901201-HERV0899uL	16.5769179263519	-1.34096817006102	0.328079086242664	-4.08733206806474	4.36362322865635e-05	0.00483338910797584	hervdb4
100994502-MALR1127uL	9.70538831097441	-1.34205372368782	0.341751265921151	-3.9269897657013	8.60156397047724e-05	0.00865839930181839	hervdb4
200708602-MALR1044uL	3.67678573381965	-1.61775293840826	0.413699895138537	-3.91045044347067	9.21241604072029e-05	0.00914704610715524	hervdb4
042438502-HERV0901cI	4.49109784120714	-1.7826914082743	0.433857772616954	-4.10893043939589	3.97495771468282e-05	0.00445395487939694	hervdb4
190186602-MALR1020uL	3.6300414397384	-1.85570248005993	0.449337829999227	-4.12986033262127	3.62983680011159e-05	0.00412181271719478	hervdb4
040064101-MALR1023cL	1.42841917578039	-2.08793993746819	0.524482557844687	-3.98095209504847	6.86397828459311e-05	0.00715081880612279	hervdb4
170803102-MALR1003uL	44.4361313595768	1.02954936137717	0.22889529224314	4.49790535789418	6.86262320912025e-06	0.00097881936129425	hervdb4
0X0915504-MALR1046cI	81.8909637927046	1.04034021870701	0.226749244532565	4.58806476225149	4.47373866397634e-06	0.000671196191600981	hervdb4
170646802HFRDsLU3	28.0519070202021	1.0446074312119	0.266159801860472	3.9247377850075	8.6824259790315e-05	0.00872567466910951	hervdb4
120667001-MALR1042uL	39.5998439117729	1.05831986323408	0.223165170748269	4.74231646311811	2.11288222619208e-06	0.000343425007088138	hervdb4
052448802-HERV0417uL	37.1311020540632	1.06475987637342	0.199564436928161	5.3354189391806	9.53242078243777e-08	2.29718101383441e-05	hervdb4
190011702-MALR1014cL	28.1265530092341	1.06574337391733	0.235042809578546	4.53425218932802	5.78079270330571e-06	0.00084181732433955	hervdb4
020935201ERVH5LU3I	14.9880901944691	1.07139861117663	0.268402477374067	3.99176125965277	6.55843814084752e-05	0.00687419884197908	hervdb4
070635701-HERV0515uL	29.9558015587504	1.07817950210317	0.254314804682613	4.23954674384273	2.23971554056267e-05	0.00271188446226817	hervdb4
030577701-HERV0425uL	20.2821292446894	1.08671790433185	0.237938756981382	4.56721686756092	4.94242596102051e-06	0.000731706764928898	hervdb4
082001201-MALR1127uL	20.1380413771644	1.10770377926103	0.264804727176479	4.18309669571271	2.87565006994766e-05	0.00335995988980888	hervdb4
042634702-MALR1126cL	14.0118584140631	1.12055679191935	0.26615900859282	4.21010281727348	2.55254497207869e-05	0.00303454661257536	hervdb4
030577602-HERV0414cL	23.1039285002773	1.14555381004119	0.237208974962402	4.829302138432	1.37012381136001e-06	0.000237137339161172	hervdb4
220278101-HERV0794uL	31.3889477955953	1.14631725664938	0.276201962657085	4.15028642672091	3.32059481626791e-05	0.00381686920550278	hervdb4
023433902-HERV0370uL	43.8045429455827	1.17285298113772	0.280169512835988	4.18622629302394	2.83630584192429e-05	0.00332406232105562	hervdb4
030189201-MALR1004uL	12.3535014610808	1.17614986548623	0.294950992401576	3.98761114824426	6.6741938475961e-05	0.00698245025321918	hervdb4
082001202-MALR1127uL	24.5470615070798	1.18087893453475	0.239743071107873	4.92560193326053	8.41010540985186e-07	0.000155155490660648	hervdb4
170313001-HERV0933uL	25.2619349403036	1.18497286121405	0.224456884252492	5.27928945089102	1.29685802944394e-07	2.99225846660662e-05	hervdb4
190550102-MALR1001cL	16.5857472923056	1.18691032045663	0.269578130944367	4.40284349586788	1.06841240424627e-05	0.00142930020247317	hervdb4
022962402MR52env	7.06140462536616	1.19371800584295	0.281248515216243	4.24435309436261	2.19224928828346e-05	0.00265998023783261	hervdb4
190127702-MALR1004cL	56.3618333925666	1.20480153314513	0.267216805965853	4.5087041916783	6.52247750055374e-06	0.000934538840534817	hervdb4
190200404HRLQ5LU3p	20.3361767445706	1.21156184515686	0.266011993206713	4.5545384272031	5.25007274154175e-06	0.000772543278147851	hervdb4
021281101-MALR1043uL	26.8874594104267	1.22216167159362	0.232023728690755	5.26739949612023	1.3836987066394e-07	3.15279793288249e-05	hervdb4
110021601-HERV0406uL	10.1570621289799	1.22908574917613	0.293643146659138	4.18564425275984	2.84358410059333e-05	0.00333146709854118	hervdb4
101402801-HERV0379uL	3.81817593468601	1.23465004271816	0.301436600179406	4.09588630572176	4.20556301973458e-05	0.00467012633314654	hervdb4
041002401XA34sLU3	43.0769987470423	1.24100985735355	0.232563950988981	5.33620903874458	9.49099769751179e-08	2.29037970861651e-05	hervdb4
220158201-MALR1022uL	29.3494890446904	1.24599435125816	0.241558228875457	5.15815319999127	2.49397524780125e-07	5.28041055821835e-05	hervdb4
011760202-HERV0549uL	181.801754241439	1.25332376244343	0.216426241054428	5.79099722999039	6.99697312087928e-09	2.33694861636913e-06	hervdb4
091680202MR41sLU3	13.8900584533871	1.25773148426895	0.304478587375188	4.13077154328469	3.61547748842245e-05	0.00410685105738906	hervdb4
121603001-HERV0740uL	49.7850267593134	1.26144174194883	0.26254292749071	4.8047066207619	1.5497858287547e-06	0.000262986150755235	hervdb4
161221801-MALR1007uL	35.8574719098356	1.26623559152951	0.233864533656587	5.41439769310591	6.14953514295432e-08	1.57491637292104e-05	hervdb4
052716203-HERV0187cL	127.121058232314	1.26698454422075	0.210988260163475	6.00500019877449	1.91331670161579e-09	7.6054886803518e-07	hervdb4
121586102-MALR1019uL	25.2156325764627	1.27210046119031	0.238128644470131	5.34207240805033	9.18899336421474e-08	2.23439025022606e-05	hervdb4
200951702-MALR1126cL	23.374057870552	1.27848817944548	0.245388079273931	5.21006637008755	1.88773089911174e-07	4.14083676744473e-05	hervdb4
120666907ERVH5LU3I	40.601914289991	1.29299699665998	0.244383515618161	5.2908519356937	1.21747901844489e-07	2.83359871885142e-05	hervdb4
050849301-HERV0469uL	9.56102106497944	1.29553719773145	0.326021816506462	3.97377455169711	7.07425273674457e-05	0.00731934163597227	hervdb4
090300102-MALR1130cL	19.7335214455456	1.31933107128449	0.288521419156424	4.57273181014409	4.8140615837441e-06	0.000714397454527764	hervdb4
110008301-MALR1002cL	41.8525552560864	1.32227779840446	0.252339293912438	5.2400788553498	1.60507994812784e-07	3.58426540282705e-05	hervdb4
091117802-HERV0706cL	7.56281704910966	1.33413480894105	0.322362061238938	4.1386222802198	3.49397635692271e-05	0.00398456568886524	hervdb4
170035101-HERV0761cL	39.869371269991	1.35683314927804	0.21929450452928	6.18726471140035	6.12171197528385e-10	2.89133938533183e-07	hervdb4
041467101-HERV0489uL	10.3097633263565	1.36362215457007	0.329380422698183	4.13996115312409	3.47364640010984e-05	0.00396651784720671	hervdb4
160942102-MALR1023uL	10.2743040133855	1.36679512791459	0.318255359860072	4.29464920407163	1.74969776813549e-05	0.00218882523251038	hervdb4
190391901-HERV0922uL	12.5135438382706	1.36935258056179	0.300011649548313	4.56433136054362	5.0108880459434e-06	0.000740586211841314	hervdb4
110976902-HERV0794uL	14.1144567722037	1.37045037673718	0.291335425652159	4.70402929430708	2.55076624303761e-06	0.000407723123748923	hervdb4
220246602-HERV0552uL	86.6005678351375	1.37760557332042	0.235194914164334	5.85729320812554	4.70472077328198e-09	1.65413597035898e-06	hervdb4
141286501-HERV0796uL	44.4830065119571	1.37997403697474	0.331193759495843	4.16666678465017	3.0908577774762e-05	0.00358725573892906	hervdb4
140266001-MALR1023uL	22.8397180612893	1.43783928608916	0.28682410720943	5.01296526319975	5.35975756506442e-07	0.000103675756423002	hervdb4
190427001-HERV0476uL	19.6228316383161	1.4391931852587	0.264370210701406	5.44385534754597	5.21395659596456e-08	1.36041144205385e-05	hervdb4
011215303ERVHsLU3I	15.0358447228794	1.44114847746426	0.307549731022223	4.68590387861572	2.7872706268784e-06	0.000441863249401253	hervdb4
160504802-MALR1004uL	54.4446826297949	1.45329580972437	0.254160471683327	5.71802452245647	1.077695929705e-08	3.40602952209679e-06	hervdb4
220292202-HERV0857uL	45.3009661626895	1.45448449936668	0.220686249803982	6.59073458658426	4.37655674433005e-11	2.96053162069671e-08	hervdb4
220111102-HERV0491cL	30.8397864693644	1.46019638055128	0.269851409493873	5.41111266859784	6.26343469114941e-08	1.60290347088692e-05	hervdb4
031784901-HERV0912uL	18.7596057727947	1.4654516832477	0.30800695060824	4.75785264051276	1.95663246429138e-06	0.000321491760302271	hervdb4
023608402-HERV0741uL	20.0740246471035	1.46757445078209	0.347713698588183	4.22064030477047	2.43609379153854e-05	0.00291508023289553	hervdb4
110899801-HERV0794uL	18.3968093459386	1.47529596099453	0.302934810649035	4.8700113329126	1.11591848196258e-06	0.000197776318493695	hervdb4
072097702-HERV0918uL	24.630913706927	1.48162399487852	0.25074405619634	5.90890973590361	3.4437932698214e-09	1.26328238952793e-06	hervdb4
012698101-MALR1020uL	10.300642609053	1.48667154644491	0.308072152699125	4.82572518619316	1.39494749354117e-06	0.000240593776942673	hervdb4
012777202-MALR1133uL	26.7113325099258	1.48857687084548	0.270553654249724	5.50196549728177	3.75580466003493e-08	1.01506178592315e-05	hervdb4
220420702-MALR1025cL	9.22399862673979	1.4946828223329	0.309730517941294	4.82575250339459	1.39475628625654e-06	0.000240593776942673	hervdb4
012777102-HERV0740cL	43.5426266180578	1.50041837399995	0.347038112061517	4.32349739654525	1.53574951362882e-05	0.00195501025759161	hervdb4
170366901MR52sLU5	22.34599901832	1.50300134819096	0.283477736405083	5.30200843019011	1.14535551011726e-07	2.68736490277816e-05	hervdb4
012777201-MALR1133uL	9.72645893377383	1.50734781864063	0.329874854731484	4.5694535276646	4.88997577737451e-06	0.000724250701777423	hervdb4
050857802-HERV1038uL	21.7754253081601	1.51389078765332	0.300775417182602	5.03329295270906	4.82125491630393e-07	9.42575707637064e-05	hervdb4
110820901-HERV0201cL	73.4880955515515	1.51742410090391	0.237913145304204	6.37805909784297	1.79346311540868e-10	1.01033696478753e-07	hervdb4
010912001ERVH5LU3I	5.9374190486225	1.52660794184833	0.386718768205161	3.94759206783166	7.89411640327762e-05	0.00804291331258191	hervdb4
051877201-HERV0374uL	12.6533478075317	1.52786025384536	0.364162043697204	4.19555052562193	2.72209594563286e-05	0.00320536727198343	hervdb4
020121302-MALR1014uL	12.0230141704662	1.52941301130599	0.345370686446541	4.42832316500817	9.49685351813498e-06	0.00129137856891191	hervdb4
100577101-HERV0700cI	5.25027834978443	1.5760119318129	0.354114152515436	4.4505759530303	8.56402975536859e-06	0.00118213588134766	hervdb4
022330302-MALR1127cL	17.6716130269081	1.58041992795303	0.395769044662172	3.99328838186947	6.5163235859887e-05	0.00683997159954567	hervdb4
052681401-HERV0889cL	43.3971385951979	1.5825130181375	0.323995301836545	4.88437026452896	1.03759933776904e-06	0.000185793458303721	hervdb4
190175102-MALR1044cL	39.2942717123147	1.58303385193147	0.304379618053783	5.20085366442556	1.98375249959868e-07	4.32957102145115e-05	hervdb4
010447101-MALR1018uL	27.1793876272483	1.58925593801912	0.331422915775701	4.79525060691545	1.62471587001418e-06	0.000274493135935892	hervdb4
060039002-HERV0577uL	11.0531926264235	1.59167059789942	0.366393140419802	4.34416047220681	1.39809291926324e-05	0.00180091390067829	hervdb4
190719510HK063LU3p	11.0801971696729	1.59542812119053	0.315909187390178	5.05027452468491	4.41175577232389e-07	8.70857501770101e-05	hervdb4
120604602-HERV0616cL	314.181571748584	1.60590467531845	0.238494465585274	6.7335091880539	1.65619197468688e-11	1.28288334610679e-08	hervdb4
220279401-HERV0484uL	8.22278956552622	1.61445447134411	0.370225995026438	4.36072694254983	1.29631054230121e-05	0.00169178519890698	hervdb4
091622701-MALR1026cL	41.4384129767819	1.62848994802994	0.295749708547266	5.50631125227188	3.66430435337312e-08	9.93427263052766e-06	hervdb4
121758502-HERV0416uL	8.409403348908	1.64602591050534	0.360870898464171	4.56125976771931	5.08476283192788e-06	0.000750218706605277	hervdb4
011721202-MALR1015cL	7.99803940222048	1.64985306846492	0.400769142683885	4.11671681461334	3.84307794625304e-05	0.00432585826809215	hervdb4
051394303HE41sLU3p	39.8761549641318	1.66238611764655	0.276362229058331	6.01524355665721	1.79616437563552e-09	7.29011651032794e-07	hervdb4
110222802-MALR1018uL	3.69449008669937	1.68042037512769	0.428903884069059	3.91794161243156	8.93083306132423e-05	0.00892363285039083	hervdb4
190631601ERVHsLU3II	9.612388225711	1.69330848654016	0.369813582667485	4.57881637101114	4.67614483213511e-06	0.000697342406380544	hervdb4
091622702-MALR1026cL	45.0353014398094	1.70148822232147	0.310991269466611	5.47117681226142	4.47056999425453e-08	1.18697566901776e-05	hervdb4
190711505HK01pol	24.6103417441862	1.70479426630509	0.295384872108239	5.77143390633898	7.85997882782268e-09	2.58653108877894e-06	hervdb4
170803101-MALR1003uL	4.55785823856241	1.71518721246596	0.435093670243707	3.94211023917043	8.07678357736227e-05	0.00820974058879981	hervdb4
210448302-HERV0867cL	5.80930596662674	1.72603385635002	0.388864814146949	4.43864755451432	9.05259135191562e-06	0.00123824605870783	hervdb4
011740801-HERV0466cL	9.09435629443391	1.73174281925807	0.345069642129891	5.01853135665352	5.20679956384306e-07	0.000101055010326891	hervdb4
041467002-MALR1018uL	9.42991174300308	1.73802334123028	0.394545570164454	4.40512699333017	1.05721923913693e-05	0.00141705762983892	hervdb4
190194201ERVFsLU3p	12.9687804975572	1.73930680585703	0.392233460206832	4.43436621888368	9.23435402102925e-06	0.00125963267782137	hervdb4
052843901-MALR1018uL	29.3420011586178	1.74011088730777	0.293811930853909	5.92253310561784	3.17019959188211e-09	1.16909953493616e-06	hervdb4
110818201-HERV0513uL	4.63372507156117	1.74809104925055	0.42203903390952	4.14201272583076	3.4427123599532e-05	0.00393897145780073	hervdb4
071406801-HERV0495uL	7.01229912631232	1.75549038957921	0.422011610348231	4.15981538548344	3.18504935623455e-05	0.00368261798116096	hervdb4
220263302-MALR1022uL	61.0924536472323	1.75700273684025	0.253037755776739	6.94363863387445	3.82127242802785e-12	3.68349432770618e-09	hervdb4
041581204-HERV0116cL	4.81978998948712	1.76091084800249	0.400187403745202	4.40021557780878	1.08143388276195e-05	0.00144449263277926	hervdb4
150300002-HERV1036uL	10.3050989950344	1.76415310545212	0.339432305338993	5.19736359121814	2.02134764610989e-07	4.39779348058342e-05	hervdb4
120147702-MALR1133cL	7.39220356769735	1.77199903295973	0.419411466352151	4.2249656366617	2.38977241069524e-05	0.00286756162503272	hervdb4
060402302-HERV0866uL	5.58143505158856	1.7776547011157	0.432183544952154	4.11319385450573	3.90222431659483e-05	0.00438662093406135	hervdb4
041465301-HERV1036uL	6.36069677179257	1.77994732751813	0.404434826006708	4.40107333261308	1.07716709241867e-05	0.00143934741783261	hervdb4
011760201-HERV0549uL	82.1105065472813	1.7828867299083	0.257986762774795	6.91076825311631	4.82035979808969e-12	4.4846146303836e-09	hervdb4
161217601-MALR1018uL	6.06955571615983	1.79450029628104	0.4185506216189	4.28741519804736	1.8076423095779e-05	0.00224995708131177	hervdb4
190202102HRLQuLU3p	4.51768388521484	1.7979106382598	0.442427873290457	4.0637372706386	4.82931826470643e-05	0.00526010679290152	hervdb4
032015101-HERV0802cL	9.64375035192289	1.80692923978159	0.40600772408956	4.4504799602852	8.56785888299619e-06	0.00118219419068681	hervdb4
170875202-HERV0543uL	6.79557615476161	1.81365044040199	0.344054456475387	5.27140516934921	1.35383232808373e-07	3.10308384736866e-05	hervdb4
110907601-HERV0476uL	5.1331245962657	1.82136918783552	0.391027075134902	4.65791067589668	3.19434748645516e-06	0.000500001111749963	hervdb4
070028801-MALR1019uL	5.95490400985224	1.84761240231146	0.43015137449183	4.2952609520176	1.74487966703024e-05	0.00218358507772389	hervdb4
101434101-MALR1004cL	41.796177204228	1.85127067829104	0.287003966014649	6.4503313455834	1.1160587082319e-10	6.71540115104692e-08	hervdb4
170281401-HERV0118cI	4.18476042873298	1.85192697177973	0.473759159510756	3.90900510228064	9.26770068215255e-05	0.00919667569551209	hervdb4
091622801-HERV1035uL	35.3925948813727	1.8630927859155	0.350725706327366	5.31210787320078	1.083644219494e-07	2.56686837575978e-05	hervdb4
052190202-HERV0402uL	15.4862956731762	1.86876972986216	0.390427999841574	4.78646442012475	1.69745014727688e-06	0.000285786004010608	hervdb4
190086102-MALR1126uL	38.0991823870915	1.87079357797352	0.297632693260623	6.28557823227892	3.26635624173211e-10	1.67134696356061e-07	hervdb4
160012601-HERV0422uL	4.22603250032065	1.87366198276092	0.446553395564895	4.19582966196175	2.71874523805327e-05	0.00320250839276729	hervdb4
200951701-MALR1126cL	3.72046836939509	1.87822694979015	0.448999339852253	4.18313966877589	2.87510633128497e-05	0.00335995988980888	hervdb4
160379801-HERV0758cL	9.99632674484004	1.88166892772023	0.368335818774829	5.10856895204791	3.24607946087154e-07	6.60289856102954e-05	hervdb4
051366502-MALR1003cL	18.3535599304438	1.89277382359868	0.359831611303076	5.26016548891933	1.43925809984415e-07	3.26652286336112e-05	hervdb4
190698403ERVL3LU3	4.87983904834405	1.89341636034996	0.398243588541889	4.75441768512188	1.99019206319835e-06	0.00032592564878296	hervdb4
150670001-HERV0489uL	5.11829851282583	1.90833797573813	0.43063420742729	4.43145932864689	9.35974689555704e-06	0.00127523335991213	hervdb4
041581205-HERV0116cL	4.81711653149953	1.91421078617776	0.450758150469544	4.24664708599007	2.16993347135664e-05	0.00263659073259867	hervdb4
010352401-MALR1026uL	18.546697203089	1.92448919895184	0.336081168889452	5.72626310873392	1.02666953718837e-08	3.26558077722374e-06	hervdb4
060618101-HERV0811cL	27.9681582732376	1.92686420786024	0.431551691062842	4.46496734403863	8.00809652318907e-06	0.00111964933742025	hervdb4
210593802-HERV0796uL	6.82970037068153	1.93493071589089	0.400000451913265	4.83732132460305	1.31600591597465e-06	0.000228748781102573	hervdb4
062429601-HERV0617uL	5.48550042902974	1.93932668553523	0.455440630304955	4.2581327982018	2.06141485404781e-05	0.0025295338849069	hervdb4
160353401-HERV0700cI	10.0216214352751	1.94109976136213	0.388230401971584	4.9998654188453	5.73703447283366e-07	0.000110236196166264	hervdb4
150742202-HERV0901cI	4.15866375226161	1.95913577214757	0.492329032006855	3.979322048431	6.91120684554973e-05	0.00718055448708565	hervdb4
030585602-MALR1022uL	4.90001762522387	1.97011219160473	0.486684852625577	4.04802446794127	5.16517479290639e-05	0.00558036634917608	hervdb4
011384502-MALR1134uL	21.2825889186002	1.97275773435798	0.298356258311167	6.6120876616589	3.78937477016096e-11	2.58856069437255e-08	hervdb4
170067001MR41sLRp	3.99588938716926	1.9751181543842	0.47806189552077	4.13151136472116	3.60385870326658e-05	0.00409499360578771	hervdb4
190191501-HERV0173cL	8.24296181312163	1.97619881289406	0.405647030080385	4.87172015656677	1.10630793986699e-06	0.000196273507818325	hervdb4
060626502-MALR1013uL	5.35536943265118	1.97993191000218	0.432319645597252	4.57978703990398	4.6544960744812e-06	0.000695009994736	hervdb4
060395801-HERV0483uL	3.70743195982027	1.98167317033221	0.496667012391709	3.98994320317233	6.60891189413156e-05	0.00692041220730699	hervdb4
220240602-HERV0755cL	41.8412973253643	1.98477716715752	0.31159828194002	6.36966659379584	1.89439551790977e-10	1.05520567034518e-07	hervdb4
190630102-HERV0892cL	12.9150350942777	1.98892985905501	0.380117677305263	5.2324055885929	1.6731811760126e-07	3.71958572517547e-05	hervdb4
190410601-HERV0183cI	5.60526453373521	1.99042718887822	0.444386685822831	4.47904325754657	7.49783396523085e-06	0.00106070050656927	hervdb4
110922001-HERV0371uL	12.7971838422473	1.99829347710083	0.396504817643518	5.03977098935887	4.66089235904763e-07	9.14314791654442e-05	hervdb4
160386401-MALR1026uL	103.623359055217	10.6285781325898	1.32531441632429	8.01966537274058	1.06033626268552e-15	3.96571061117635e-12	hervdb4
041467102-HERV0489uL	9.67998912094188	2.00823844436014	0.394050269839081	5.09640164738435	3.46170278465178e-07	6.98418662982477e-05	hervdb4
220250701-HERV0552uL	23.7796924205226	2.00840524750806	0.294866710743552	6.81123088613006	9.67671795938676e-12	8.2103048074973e-09	hervdb4
032792101RRHIsLU3	5.65949990452488	2.01141299776647	0.458270398615336	4.38914013177362	1.13799725122262e-05	0.00151016369452878	hervdb4
012714002-MALR1129uL	3.31592392715521	2.01311127912268	0.517982119197608	3.88644936671007	0.000101721131490456	0.00994065532239315	hervdb4
150556501-MALR1022uL	3.93136971421731	2.02029155243059	0.51562874326771	3.91811274838431	8.9244962946912e-05	0.00891986953969971	hervdb4
120061901-MALR1004uL	3.38110713239403	2.02691157932201	0.489119084086087	4.14400428294322	3.41293364570417e-05	0.00391264034929719	hervdb4
141119502-MALR1041cL	8.50273723697431	2.03309250684042	0.404480418186738	5.02642999617795	4.99694772936588e-07	9.73633240339442e-05	hervdb4
190423701-MALR1018uL	2.45915313774216	2.03463011150774	0.52317070207596	3.88903679704208	0.000100642859272779	0.00985470796411959	hervdb4
121615802-MALR1041cL	5.52866711635846	2.03847537913288	0.472201564620813	4.31696023872733	1.58192640718494e-05	0.00200570004319079	hervdb4
170864202-HERV0198cI	5.21948212601925	2.0459609748271	0.501038485884279	4.08344075848025	4.43737453395458e-05	0.00489620893727478	hervdb4
120689202-MALR1127cL	7.54080822349562	2.06341159758433	0.424865398686729	4.8566242484382	1.19403869051089e-06	0.000210546395518846	hervdb4
070066202-HERV1052cI	8.25125937781449	2.06985987448714	0.459006475073435	4.50943502301572	6.50004989257134e-06	0.00093208566682649	hervdb4
032202703-MALR1039cI	6.58864847375597	2.07381040128524	0.490158373408391	4.23089865192893	2.32759533863501e-05	0.00280656789883693	hervdb4
051378004-HERV0172cI	2.59962236138103	2.07611814322513	0.523616418388258	3.96495997893959	7.34082623204187e-05	0.00756133428032998	hervdb4
110885801-MALR1023uL	3.75803433705601	2.07692017170726	0.487876005477106	4.25706562403329	2.07127571610732e-05	0.00253894065349192	hervdb4
110814001RRHIsLU3	34.4277426577223	2.07800262731475	0.396341633468643	5.24295822553083	1.58022326334431e-07	3.53558398997899e-05	hervdb4
023610002-MALR1005uL	12.6235535578073	2.07850257949482	0.388093036850735	5.35568119531668	8.52346808201453e-08	2.09328654905922e-05	hervdb4
121193103-HERV0372cI	3.974708174607	2.08619001368029	0.522117768786702	3.99563113610973	6.45221294139884e-05	0.00679116449779868	hervdb4
011827401HK05gag	9.24217155419293	2.09686964432821	0.453756969155561	4.62112934205832	3.81656726717111e-06	0.00058447712844383	hervdb4
160678602-MALR1012uL	15.7925963265363	2.09905904284679	0.441524506814839	4.75411672613468	1.9931586429099e-06	0.000326257505784241	hervdb4
052681402-HERV0889cL	23.2733277183188	2.09926875504348	0.36604854718552	5.73494628290256	9.7543256034533e-09	3.13087835356472e-06	hervdb4
140213602-MALR1130uL	6.79272518556575	2.1021001203104	0.441941219961248	4.75651517750421	1.96963437062454e-06	0.000323474926310519	hervdb4
170812402-MALR0818uL	15.3907469369759	2.10382582860916	0.334496992731646	6.28952090548982	3.18447223305607e-10	1.63472715135372e-07	hervdb4
011829401-HERV0883uL	27.0477539833744	2.11150931650896	0.350023225554427	6.03248345353194	1.6145888022222e-09	6.66224264146431e-07	hervdb4
0X0925501-HERV0516uL	3.13493990133139	2.11777686795856	0.544096773302279	3.89227977792474	9.93066294294966e-05	0.00974586723547057	hervdb4
012289302-MALR0818uL	20.3690436893427	2.12122213535785	0.40835033811718	5.19461339284882	2.05145704355029e-07	4.457712105528e-05	hervdb4
140662502-MALR0820uL	7.60940644222144	2.12203903413228	0.425766401345063	4.98404530613131	6.22684891845065e-07	0.000118467166210567	hervdb4
071212203-HERV0882cI	12.239446029897	2.12907492513854	0.368574776634986	5.7765074012296	7.62671490696839e-09	2.52299581221751e-06	hervdb4
170877602-HERV0931uL	24.9555099384565	2.13026674726095	0.303720226446775	7.01391136238424	2.31746245132232e-12	2.44439458923365e-09	hervdb4
030654202-MALR1015cL	3.30702070394625	2.1340653501751	0.48957501550651	4.35901604980233	1.30648532002727e-05	0.00170186387295745	hervdb4
200371903-HERV0501cI	4.00775482930897	2.1432975972113	0.440610878424178	4.86437739548486	1.14817652107577e-06	0.000203182160297662	hervdb4
031601002-HERV0419uL	37.0388441615674	2.15031426700646	0.335798104697099	6.40359262583125	1.5176271258583e-10	8.76284467912391e-08	hervdb4
072122901-MALR1045cL	3.73380251804338	2.15312818133786	0.55377297280384	3.88810629459981	0.000101029383597932	0.00988697594364195	hervdb4
041598801-MALR0818uL	4.99079030745882	2.16818552527747	0.479981158667286	4.51723049150022	6.26536949843665e-06	0.000903661065397958	hervdb4
090518101-MALR1009uL	8.49409295662785	2.17708874126101	0.418689036136645	5.19977490060305	1.99530020810359e-07	4.34930325512631e-05	hervdb4
010057501-MALR1004uL	5.43049316566019	2.19058498908398	0.475799050484509	4.60401294801512	4.14426680156843e-06	0.000628559206940681	hervdb4
060615402-HERV0514uL	9.75764284237694	2.20415019580997	0.402910975005315	5.47056380328408	4.48606167546617e-08	1.19017822830296e-05	hervdb4
190553001-HERV0628uI	4.17135787452133	2.20964829805969	0.500509542005373	4.41479754652902	1.01104565327907e-05	0.00136784819727447	hervdb4
0X2198303-HERV0116cL	12.8218019547828	2.21536957829623	0.39008147719939	5.67924833089127	1.35287944585296e-08	4.14365600441212e-06	hervdb4
041465201ERVLsLU3	27.2873589457424	2.22127052018385	0.365662618255228	6.07464479356058	1.24262469447509e-09	5.3434401669981e-07	hervdb4
220007005ERVHpol	20.0135191683404	2.23164704905397	0.374317028197626	5.96191698731842	2.49295795661041e-09	9.50666230882357e-07	hervdb4
022980501-MALR0819cL	3.44196186373488	2.255343496316	0.566680941019166	3.97991768041431	6.89391361860592e-05	0.00717124071921051	hervdb4
190172201-HERV0912uL	8.9279832215377	2.26286145337927	0.386656854197822	5.85237641286333	4.84598323989333e-09	1.69521482248768e-06	hervdb4
012290402-HERV0617uL	5.18705456706868	2.27459066741626	0.489604843143206	4.64576831555352	3.38813084783748e-06	0.000526769339971578	hervdb4
190232803ERVIsLU3	4.23893903006852	2.28033301696232	0.528517496108121	4.31458378152883	1.59903883624061e-05	0.00202369969712698	hervdb4
011614502-HERV0739uL	13.4028385983192	2.28448307019872	0.384503325371467	5.9413870295964	2.82620472589985e-09	1.05912479911638e-06	hervdb4
030056602PBLAsLU3p	7.22654286070756	2.28895806083875	0.42691571089572	5.36161589377032	8.24807783542504e-08	2.02996309960936e-05	hervdb4
033005601-HERV0540uL	3.90794772060854	2.30752743871864	0.543874939725012	4.24275374755334	2.20793669716339e-05	0.00267620744900328	hervdb4
101367702-MALR1133uL	42.3482514476257	2.31059958982757	0.313398091817747	7.37273024358831	1.67168532588185e-13	2.75511314851049e-10	hervdb4
030699101-MALR1131uL	5.27469588223244	2.31341258030113	0.465522291632843	4.96949903770819	6.7126103916095e-07	0.000126943327416694	hervdb4
170471502-HERV0490uL	52.0016226337252	2.32733425395062	0.306069274553359	7.60394605877005	2.87235014047749e-14	6.26894934433017e-11	hervdb4
101608701-HERV0933cL	3.81059042366763	2.33810541649235	0.522603956446594	4.47395276604893	7.67867111918902e-06	0.00108055654978953	hervdb4
061975402-HERV0802uL	12.2098724876601	2.3402147441854	0.430204348865933	5.4397747264863	5.33479848540307e-08	1.38672791790605e-05	hervdb4
071811602-MALR1010uL	4.26444019613222	2.36065571174299	0.543026804840137	4.34721765242869	1.37875385009234e-05	0.00177798276127478	hervdb4
042033402-HERV1035uL	3.610868950148	2.36368507488822	0.538186327600786	4.39194560260466	1.12340810050575e-05	0.00149308724257949	hervdb4
150400602-HERV0118cI	7.54589378329238	2.36665833587317	0.459505980890182	5.15044076529394	2.5987500065777e-07	5.45894810703748e-05	hervdb4
190450802-HERV0740uL	1342.53576505478	2.37050194104808	0.291936523722744	8.11992247773486	4.66481553297705e-16	1.95034251355867e-12	hervdb4
060039101-HERV0569cL	17.0120203461708	2.37392152366452	0.384260897309975	6.17788991875883	6.49639830099451e-10	3.04645964650151e-07	hervdb4
111638001-HERV0490cL	7.52954017783656	2.37956925570971	0.471832510662612	5.04324988621067	4.57690904717065e-07	8.99874774815388e-05	hervdb4
060529902-HERV1034uL	9.00688670079774	2.40853670477853	0.450871186288364	5.34196191290454	9.19459765236243e-08	2.23439025022606e-05	hervdb4
032835703-MALR1132cI	4.09948937905622	2.41157082344795	0.541434028872246	4.45404369664576	8.42679385082285e-06	0.00116737165752996	hervdb4
020936901-HERV0490cL	20.5742784168963	2.42689858753313	0.428642647796722	5.66182249948226	1.49773705637644e-08	4.53529418240621e-06	hervdb4
101422002ERVH5LR	3.89936213181381	2.4293559266287	0.609596547250216	3.98518649357038	6.74271476704874e-05	0.00704563950153946	hervdb4
190026402-MALR1004uL	5.49711879111506	2.43218952472491	0.460648640586565	5.27992337419664	1.29237922783925e-07	2.98589507087068e-05	hervdb4
013080104HE41env	4.20946128396784	2.43226186558573	0.622292931611214	3.90854811621951	9.28524560403655e-05	0.00920881946131113	hervdb4
060039201ERVTsLU3	8.5456599316785	2.43293314884028	0.451240212098741	5.39165855260236	6.98103235259991e-08	1.76314253784514e-05	hervdb4
013067004-HERV0201cL	5.27896865106926	2.4473624193828	0.473264891419328	5.17123172192875	2.32555968748703e-07	4.96930863763392e-05	hervdb4
110817902-HERV0625uL	8.99864158891189	2.45184572227518	0.430222469906194	5.69901828421417	1.20499302932259e-08	3.75411797242509e-06	hervdb4
023088901-MALR1003cL	2.46519064171479	2.4554659845496	0.598546979348492	4.10237804093896	4.08925413673429e-05	0.00456433892096988	hervdb4
010098601-HERV0809cL	3.4433854252707	2.47767634392824	0.544154438599151	4.55325945756626	5.28210609143999e-06	0.000776364445511015	hervdb4
150855001-MALR1022uL	12.899453389394	2.48451459642921	0.374423181957245	6.6355789816265	3.23231232209084e-11	2.31273612785972e-08	hervdb4
190481602-HERV0491uL	6.16479401141464	2.50324211727033	0.484796860243007	5.16348665297784	2.42391872449219e-07	5.15093861465572e-05	hervdb4
101593001-MALR1022cL	2.93543441698849	2.51675841861634	0.56140006859665	4.48300340416338	7.35997548188511e-06	0.00104204760984242	hervdb4
190528801-MALR1023cL	6.2656122284948	2.51824493745292	0.491072338457932	5.12805291652291	2.92754164413654e-07	6.03992569172569e-05	hervdb4
060414402-HERV0537uL	41.9542409050946	2.5187707055054	0.316587193302028	7.9560094621467	1.77676819025622e-15	6.04484409198739e-12	hervdb4
170301201-HERV1031cL	2.73914099550381	2.52030223305819	0.558016133078896	4.51654008487573	6.28582227595486e-06	0.000905857992608744	hervdb4
021927801-HERV0421cL	324.511698868322	2.52657325198398	0.30496466022512	8.28480667274332	1.18301097132337e-16	5.70178426761993e-13	hervdb4
160392202-MALR1022cL	50.0896623261095	2.53473311285266	0.365967909471336	6.92610758280485	4.3257754733707e-12	4.05710974261919e-09	hervdb4
070896402-HERV0517uL	2.54390003065551	2.54566620144901	0.613985898582939	4.14613138074397	3.38139852040659e-05	0.00387905095719503	hervdb4
042477302-MALR1041uL	3.83525505412251	2.54931202211267	0.575226476812356	4.43184054433621	9.34321041657396e-06	0.00127348031373115	hervdb4
030582601-HERV0912cL	3.46169448756536	2.5537100896995	0.583822151339377	4.37412332478461	1.21921443425464e-05	0.00160383545479547	hervdb4
190406402-MALR1012cL	1.77868894803809	2.58107624136894	0.651563619716121	3.96135720790164	7.45249447174471e-05	0.0076604402594338	hervdb4
190097101-MALR1019uL	4.60585383159438	2.58303694984219	0.576779923093679	4.47837528044932	7.5213292513407e-06	0.00106282372881115	hervdb4
140268601-HERV0799uL	3.26221531395036	2.58419372616098	0.629824431007979	4.1030382419831	4.07759819028242e-05	0.00455572480357954	hervdb4
101251401-MALR1001uL	4.76445203196002	2.58828727731905	0.49877052534594	5.18933486601649	2.11046567930151e-07	4.56307663570846e-05	hervdb4
090142901ERVPenv	4.10166141905419	2.60277888057693	0.636939355069067	4.08638414295297	4.38148120633349e-05	0.00484841074050334	hervdb4
190636001-HERV0909cL	6.41361208271025	2.60972152350703	0.541310934010242	4.82111363273822	1.42759003237843e-06	0.000245248659918794	hervdb4
120422501-HERV0971uL	2.72396132119086	2.62398721332332	0.643293893363344	4.07898666596116	4.52324309030257e-05	0.00497041107408739	hervdb4
190450801-HERV0740uL	175.214441051639	2.6291121725124	0.33070148074393	7.95010704699015	1.86350420737929e-15	6.21801182735346e-12	hervdb4
052491201-HERV0590uL	3.18928455771494	2.64065866657045	0.62798094601498	4.20499807092468	2.61084383808084e-05	0.00309642866948329	hervdb4
030582602-HERV0912cL	4.77720313833213	2.64071048038218	0.591992151202689	4.46071873591115	8.16852382040304e-06	0.00113704016692991	hervdb4
012535101-MALR1126uL	3.18677309937306	2.64318886726218	0.621132772254023	4.25543295303892	2.08644881925744e-05	0.00255183542155048	hervdb4
190672302-MALR1133cL	78.9659820899885	2.65838347405489	0.351073514970538	7.57215614592283	3.67079857296417e-14	7.50129217127039e-11	hervdb4
190098302-HERV0561uL	13.2235766405004	2.66007831757848	0.431455091432038	6.16536545842916	7.03205387547529e-10	3.27188406416228e-07	hervdb4
190706701-HERV0763cL	4.429808060535	2.66375119253675	0.515349075268899	5.16882889747471	2.35565437577952e-07	5.01816563218544e-05	hervdb4
022590801-HERV0566uL	6.89509577063022	2.67290325973481	0.500715263565816	5.33817012227644	9.3889342525431e-08	2.27048638628398e-05	hervdb4
100298202-MALR1042uL	4.24119596445365	2.68463506572192	0.64120576081033	4.18685425147957	2.82847325070424e-05	0.00331600266033577	hervdb4
072122902-MALR1045cL	3.60150503095787	2.68473323206891	0.625189888021473	4.29426848307678	1.75270270743812e-05	0.00219100465970885	hervdb4
210031502HR46sLU3p	18.8419182130663	2.68938636187423	0.498838230332632	5.391299620482	6.994993023899e-08	1.76469179961934e-05	hervdb4
011790805-HERV0183cL	28.5379256167148	2.70220709967628	0.355162013275321	7.60837870794908	2.77555557924986e-14	6.13486176504003e-11	hervdb4
190359601-HERV0911cL	3.22852665702638	2.70222938256015	0.590508519572752	4.5761056665453	4.73711344427246e-06	0.000705222268310352	hervdb4
020135601HS49sLU3p	4.31209007441442	2.72231251603916	0.588024070331017	4.62959367378735	3.66383956486318e-06	0.000564075246583328	hervdb4
111687201-MALR1001uL	2.69142276472427	2.72814745390026	0.661665742669137	4.12315052445516	3.73725300073397e-05	0.00421893798410768	hervdb4
120640301-HERV1038uL	2.71390675442978	2.72870747805066	0.690794853942122	3.95009815501504	7.81191505371775e-05	0.00797320812335627	hervdb4
130890602-MALR1004uL	5.85131213604196	2.72969725410211	0.562437815421347	4.85333165597546	1.2140440293471e-06	0.000213531454163218	hervdb4
101593101-MALR1017cL	5.64510736552803	2.73289174121436	0.533187761729218	5.12557102276903	2.9663731599773e-07	6.10190168331548e-05	hervdb4
170838602-MALR1007cL	5.98533289008969	2.79578765431908	0.529498882731337	5.28006336840117	1.29139215844486e-07	2.98560231061649e-05	hervdb4
150070201-HERV0517cL	4.47429023298532	2.80151760866933	0.619820851622044	4.5198828037777	6.18738737412385e-06	0.00089389973628995	hervdb4
011152703-HERV0116cI	9.47602485580781	2.8084555437903	0.458276773967419	6.12829561375494	8.88254373936601e-10	4.00314328368155e-07	hervdb4
030643601-MALR1002cL	3.54130233471069	2.81129589512099	0.679832759375203	4.13527570766772	3.54528734111687e-05	0.00403744726225321	hervdb4
200531901-HERV0402uL	6.34111816052398	2.8193973620367	0.547741254737367	5.14731606876783	2.64239887538343e-07	5.53388809737815e-05	hervdb4
100417302-MALR1043uL	6.23565534013193	2.83030879295211	0.526760402935484	5.37304774083171	7.74168209778282e-08	1.92238098048085e-05	hervdb4
021941101-HERV0489uL	3.20679472760489	2.83069298414004	0.626634093765896	4.51729807283285	6.26337087745632e-06	0.000903661065397958	hervdb4
060615802-MALR1020uL	10.360831359281	2.84129503107255	0.435822509725023	6.51938568493222	7.0595917620397e-11	4.51163818280482e-08	hervdb4
220130401-MALR1041uL	4.29579254782566	2.85533517687517	0.586246711755948	4.8705350829564	1.11296436971789e-06	0.000197353549095299	hervdb4
220007007ERVH3LU3II	11.5631982309844	2.86250344792479	0.487520643730123	5.87155330700086	4.31730724703805e-09	1.53818476475066e-06	hervdb4
150742702-HERV0402cL	2.60137884817261	2.86365627358419	0.681660839960724	4.20099865755702	2.657401672305e-05	0.00313663785143973	hervdb4
140384102-HERV0907uL	2.70457191749799	2.87668057693656	0.697655639340146	4.12335314834891	3.73396550030505e-05	0.00421797105441361	hervdb4
160983901-HERV0372cI	0.946726179497382	2.87778216858913	0.737559021873494	3.90176525978788	9.54937400870662e-05	0.00943840435346445	hervdb4
190021101-MALR1009uL	5.86484267851074	2.8866356803171	0.597713685898766	4.82946224658809	1.36902266990086e-06	0.000237064993467563	hervdb4
190086101-MALR1126uL	3.19513795947337	2.88823855657588	0.600845052134393	4.80696070695089	1.53242094600725e-06	0.000260421506700996	hervdb4
190362801MR52env	6.17268718617972	2.89005291670843	0.494970218866944	5.83884202836318	5.25648799585215e-09	1.8150313077817e-06	hervdb4
060414401-HERV0537uL	10.867949050165	2.89022608685844	0.419935904832903	6.88254101065374	5.87942307938867e-12	5.31322238804546e-09	hervdb4
110701201-MALR1023cL	2.05365909620493	2.89030381001051	0.700333318637977	4.12704027224014	3.67462061392858e-05	0.00416449002431579	hervdb4
170685102-MALR1004cL	3.81989657514756	2.89375245633743	0.628184515315067	4.60653261229475	4.09438872636469e-06	0.000622081775754411	hervdb4
011035903-HERV0897uL	3.7338484033604	2.91124589978802	0.668275762822777	4.35635416058037	1.32246736319465e-05	0.00172074474831574	hervdb4
150279101-HERV0429uL	171.325214719584	2.91325500183518	0.364578141160699	7.99075609020418	1.34113664552005e-15	4.74190141700616e-12	hervdb4
130446202-MALR1041uL	2.27227745013107	2.91408243023888	0.720334556267771	4.0454569406436	5.2221164091587e-05	0.00563138233780687	hervdb4
101716602-HERV0515uL	2.2233419417972	2.9285645887149	0.735915228633748	3.9794863250104	6.90643324202092e-05	0.00718055448708565	hervdb4
051316902-HERV0540cL	5.10916084805248	2.94359052817336	0.597846360624321	4.92365718359382	8.49415887458935e-07	0.000156456635491507	hervdb4
110928602-HERV0799uL	4.61588363032401	2.94483621233164	0.666255416794996	4.41998089336023	9.87096282985216e-06	0.00133753280797161	hervdb4
070632101-MALR1043uL	3.47652887250373	2.9459383321917	0.641870298229777	4.58961622046751	4.44061698696759e-06	0.000667670236922656	hervdb4
090309104-HERV0173cI	2.44421091604906	2.94981525512661	0.677620221690725	4.35319838561865	1.34165636836732e-05	0.00174179421231137	hervdb4
140065101-MALR1042cL	8.32058317142935	2.95241647592407	0.51313360234899	5.75369935316784	8.73113766440215e-09	2.83696572312812e-06	hervdb4
060035902-HERV0402cL	32.5767788103016	2.96257048051073	0.425363764592743	6.9647927894074	3.2888746277495e-12	3.25706702444341e-09	hervdb4
020936802-MALR1041uL	8.67849462009803	2.96550779490348	0.468008813146005	6.33643579267027	2.35141104500985e-10	1.24768602574819e-07	hervdb4
052190301-HERV0933cL	9.20665952958141	2.97333736542751	0.51432914135833	5.7810011650808	7.42573763374477e-09	2.4701722279123e-06	hervdb4
080348301-HERV0553cI	13.831129985471	2.97818082343149	0.462413130159357	6.44051958992849	1.19065185939292e-10	7.09931285646959e-08	hervdb4
061579302-MALR1133uL	2.90262657521561	2.97874338796936	0.713629270753653	4.17407680716845	2.99196812227848e-05	0.00348413683823181	hervdb4
161222001-HERV1035uL	2.62178018071064	2.98019272843996	0.537522287574084	5.54431471463257	2.95107637974218e-08	8.21236989012134e-06	hervdb4
190550101-MALR1001cL	26.4059984021901	2.99760503302553	0.388978865192736	7.70634422911445	1.29473102271167e-14	3.18650751419434e-11	hervdb4
021620602-HERV0116cI	2.62063241930091	2.99876896575445	0.615464845842152	4.87236433731837	1.10270573598217e-06	0.000195934943420652	hervdb4
011753203-MALR1011cI	24.6659952163525	2.99987031299488	0.407944608579668	7.35362166799915	1.92907250576417e-13	3.09919787476983e-10	hervdb4
160023802-HERV0527uL	5.76870831680312	3.0003605005233	0.539330887797267	5.56311638811817	2.64999018339885e-08	7.47034600684865e-06	hervdb4
141255302-MALR1126uL	293.127171343766	3.00283135099792	0.333806448898636	8.99572599901977	2.3467599742219e-19	2.08813499039611e-15	hervdb4
070422002-MALR1025uL	6.97105528023616	3.01020578001571	0.507199325271429	5.93495619972441	2.9392395615918e-09	1.09439368311544e-06	hervdb4
041455901-HERV0949uL	30.6419120187895	3.01410118491237	0.432596437379603	6.96746649873009	3.22699261334913e-12	3.21930845651316e-09	hervdb4
050371602-HERV0909uL	3.28120484937264	3.0183927113551	0.713651229356443	4.22950677752917	2.34204223056417e-05	0.00282101872561742	hervdb4
010287301-MALR1045cL	2.57589521114494	3.0191771572411	0.714883410676932	4.22331405673857	2.40735993251991e-05	0.00288367981975512	hervdb4
090534301-HERV0766cI	3.8228594703883	3.04249834074996	0.677954616613117	4.48776107750321	7.19755816253641e-06	0.00102030091240334	hervdb4
030206502-MALR1014uL	4.20924566981099	3.04277076659673	0.630661687442566	4.82472746828122	1.40194833870196e-06	0.000241441246896453	hervdb4
090491701-HERV0615uL	33.5748158155559	3.04407501968427	0.422667878239448	7.20204959119169	5.93141104350926e-13	7.9779777531728e-10	hervdb4
030563602-MALR1018uL	20.5318793551834	3.05430772000061	0.39498728350548	7.73267355063656	1.05311104513182e-14	2.62914097037154e-11	hervdb4
100399101-HERV0799cL	4.40178702686826	3.0547162451454	0.615639819336821	4.96185618473477	6.9822687364399e-07	0.000131469717684176	hervdb4
170694102-HERV0492uL	12.7259141692807	3.05960580268931	0.421592854557279	7.25725251179185	3.95031850604953e-13	5.67079567833721e-10	hervdb4
050699401-MALR1046cL	5.9448038968741	3.06197509845905	0.620593425217959	4.93394704815581	8.05842952307103e-07	0.000149702152735338	hervdb4
011270701-HERV0492uL	1.75190225673462	3.07282048325714	0.734275286503941	4.18483440711666	2.8537405491119e-05	0.00334111013951691	hervdb4
0X0953902-MALR1003cL	2.98803640947517	3.07359387079665	0.785194655319865	3.91443554788915	9.06159378981783e-05	0.00903088534446462	hervdb4
061275202-MALR1015cL	1.66988987154456	3.07419749610005	0.709859381893615	4.33071334198521	1.48627066149985e-05	0.0018989749401482	hervdb4
140264902-HERV0796cL	3.90692521509589	3.07571429651198	0.643603687949909	4.77889476722725	1.76261410983781e-06	0.000295203836098416	hervdb4
190074602-HERV0425uL	8.28770220064544	3.07810011210959	0.516927279834467	5.95460954023412	2.60693472734312e-09	9.89779528536772e-07	hervdb4
110814601ERVLsLU3	8.65977779121769	3.08465796408665	0.536011499193074	5.75483542560258	8.67262421113664e-09	2.82059423968944e-06	hervdb4
011683302-MALR1023uL	3.37480093722278	3.11232570664359	0.652903161078321	4.76690249363066	1.8707979088548e-06	0.00030988271614835	hervdb4
060392901-MALR1002uL	4.16448426577034	3.11383412982811	0.596102730522354	5.2236535254578	1.75426887510616e-07	3.88491630529252e-05	hervdb4
180980602-MALR1025uL	13.8231265133431	3.11442509625205	0.449393549289203	6.93028438253749	4.19995457184583e-12	3.98215364896705e-09	hervdb4
110996401-MALR1041cL	3.71748881755396	3.1165830720324	0.653660172911479	4.7678950029199	1.86160754270664e-06	0.00030865506424752	hervdb4
082290002-HERV0436uL	2.42934318601196	3.12286414864077	0.743355156808231	4.20103919376777	2.65692584747904e-05	0.00313663785143973	hervdb4
013035404HFRDgag	4.47326324967912	3.14244733058337	0.680991414306222	4.6145182810929	3.94008095592714e-06	0.000602063801552548	hervdb4
110464602-MALR1012uL	3.90103861556421	3.14326869034323	0.624473859923287	5.03346719865802	4.81687267915787e-07	9.42249806720046e-05	hervdb4
180836102-MALR1017cL	9.66678322394673	3.1505424457094	0.536998198063509	5.86695161561192	4.43880134653222e-09	1.57018638458064e-06	hervdb4
141259502-MALR1003uL	11.3331130690979	3.15463871631472	0.487817527765583	6.46684167082792	1.00072403961778e-10	6.12471351372418e-08	hervdb4
140210201-HERV0816cI	15.1612054940247	3.15560886110983	0.474177865842558	6.65490544461134	2.83482242590156e-11	2.06668083663101e-08	hervdb4
161148701-HERV0753cL	5.11903921937296	3.15863169809644	0.664224259718017	4.75536936792608	1.98083912716821e-06	0.000324853872358182	hervdb4
042442302-HERV0118cI	16.5027726039292	3.1589421854886	0.440891424250203	7.16489823058097	7.78443609675969e-13	1.02713118414355e-09	hervdb4
190097601-MALR1002cL	2.21177349637535	3.16827686326173	0.710660121428066	4.45821675894112	8.26443082729241e-06	0.0011471691142748	hervdb4
070905304-HERV0901cI	2.20267409232128	3.16838063474386	0.788563687304477	4.0179134364838	5.87157575325188e-05	0.00624633420568199	hervdb4
170394103-HERV0769cI	16.32336453574	3.1706824019428	0.482515160037256	6.57115602688626	4.99261086506811e-11	3.31903414252095e-08	hervdb4
0X2266802-MALR1022uL	21.5164929561825	3.1711045709066	0.408560710748986	7.76164836088433	8.38325744204706e-15	2.22073129583143e-11	hervdb4
120680402-MALR1018uL	3.71339219071746	3.1751671645729	0.70044443494784	4.53307501088126	5.81311599072594e-06	0.000845459979506168	hervdb4
010552401-MALR1021uI	3.25910477045583	3.18398150858715	0.767469101083421	4.14867713122572	3.34402049606871e-05	0.00383998012093238	hervdb4
0X1486202-MALR1026uL	2.15744928030968	3.18969283609263	0.770462396886691	4.13997211152892	3.47348046795813e-05	0.00396651784720671	hervdb4
101437901-HERV0762cL	4.72006291817512	3.19265048719161	0.696421275963714	4.58436667198829	4.55364537645217e-06	0.000682005187111106	hervdb4
120003403-HERV0116cL	3.60464855037327	3.19503016423859	0.794404197590589	4.02192004262949	5.77256549227768e-05	0.00615421098964731	hervdb4
020698603-HERV0862cI	16.3512898660564	3.19682328456451	0.419326961231641	7.62370078750684	2.46504385287913e-14	5.70279678550745e-11	hervdb4
180585702-HERV0116cI	2.589575247276	3.21696170171915	0.740818484023305	4.34244254307503	1.40907342931987e-05	0.00181303915996508	hervdb4
121304301-MALR1018cL	4.25449281257433	3.22048557307758	0.630729166145229	5.10597217623522	3.29098116024355e-07	6.67857474986968e-05	hervdb4
030585601-MALR1022uL	3.51824738899855	3.22278493496842	0.634819288810256	5.07669661551777	3.84053358352708e-07	7.67758565820126e-05	hervdb4
0X1767504-HERV0806cI	2.89229107200177	3.22934866213694	0.721989135388966	4.47284938768109	7.71841430058226e-06	0.00108526909667263	hervdb4
011223701-HERV0501uI	24.9968162777824	3.23617712590968	0.444281968900799	7.28406136741566	3.23917552080668e-13	4.82428621987268e-10	hervdb4
181143001-MALR1003uL	2.12433155924548	3.24070574234657	0.769166637696804	4.21326872945316	2.51701296854467e-05	0.002997439397201	hervdb4
190016802-MALR1127uL	10.4154703492415	3.24652330205247	0.462436908549066	7.02046753196821	2.21127044684067e-12	2.34665159162890e-09	hervdb4
023441202-MALR1022uL	0.826550485424129	3.2491957443643	0.775430216881678	4.19018458866698	2.78727615143277e-05	0.00327434180795599	hervdb4
100374202-MALR1019cL	2.62434749301855	3.25103456786245	0.819826220024097	3.96551670153571	7.32371237378269e-05	0.00754594616374723	hervdb4
060278501-MALR1026uL	17.5308618959217	3.25197930744976	0.417425087470646	7.79056986525382	6.67076419069978e-15	1.85191087156531e-11	hervdb4
170088401-HERV0912cL	2.42181648308505	3.2590126576256	0.70289957899969	4.63652668886723	3.54312465299098e-06	0.00054816545567585	hervdb4
170689601-MALR1026uL	22.7043553804978	3.25965848982423	0.444767253393261	7.32890846831759	2.32034787549543e-13	3.67674483906129e-10	hervdb4
061876201-HERV0183cL	6.5682588933201	3.27078983124696	0.525164667389469	6.2281224049319	4.72058201282757e-10	2.30723432407243e-07	hervdb4
111510001-HERV0813uL	55.4656098248877	3.27154984712165	0.406766049693157	8.04282916332259	8.7787676062071e-16	3.42293026371459e-12	hervdb4
081891702-MALR1010cL	6.16101755228788	3.27235530313484	0.608661007625594	5.37631828248766	7.60243518649732e-08	1.89649113096491e-05	hervdb4
190097602-MALR1002cL	4.25045490335959	3.27462181848513	0.678217438059174	4.82827723783685	1.37719275379269e-06	0.000238241988744336	hervdb4
0X0932201-HERV0425uL	26.2178987413508	3.27538923489887	0.398505511822363	8.21918176218074	2.04896303282891e-16	9.36078475231761e-13	hervdb4
190471101-HERV0464uL	3.96213316629301	3.2861038418402	0.618288347117747	5.31484032839841	1.06750891325247e-07	2.53383681995124e-05	hervdb4
220007002ERVH5LR	7.04731491202563	3.28680137528157	0.57276832485913	5.73844822178312	9.55479654382976e-09	3.07864948620223e-06	hervdb4
161163501-MALR1126uL	8.09318482508366	3.28837513126656	0.518233106852649	6.34535904361193	2.21907295294141e-10	1.18836835822489e-07	hervdb4
091178802HFRDgag	17.7491219801302	3.29169601887591	0.510210377592822	6.45164458317404	1.10642820800594e-10	6.70074549288345e-08	hervdb4
100399102-HERV0799cL	6.2951464947387	3.29503903948305	0.593075633596836	5.55584963000346	2.76264628124952e-08	7.75014965658213e-06	hervdb4
190032001-MALR1022uL	13.5867272659689	3.2979325100977	0.441855629712164	7.46382367527162	8.40470578069964e-14	1.5111922279888e-10	hervdb4
082002702-MALR1022cL	3.63574895716344	3.32873956734645	0.637937749057367	5.21796926465799	1.80895472160234e-07	3.99327905528273e-05	hervdb4
060407301-MALR1046cL	5.0435757970557	3.33012988341547	0.610079805845171	5.45851518360306	4.80132811576451e-08	1.26850345441126e-05	hervdb4
040524502-HERV0809cL	1.98589825052819	3.35418805464463	0.848071083581339	3.95507890739553	7.65093956023672e-05	0.00783656743268402	hervdb4
111509501-HERV0606uL	12.7098762319699	3.3573393938925	0.48759837529881	6.88546058389768	5.7600862245814e-12	5.21896898604239e-09	hervdb4
010057602-MALR1003cL	4.31984293433941	3.3651000667902	0.593910602102172	5.66600436981472	1.46165798579386e-08	4.43519117053492e-06	hervdb4
071437501-HERV0541uL	3.57706874227399	3.37093751342048	0.761460206437957	4.42693851224271	9.55799635208949e-06	0.00129867497811358	hervdb4
170363002-HERV0473cL	2.7936737707608	3.37727506033122	0.758772082439129	4.45097432877963	8.54815611290571e-06	0.00118041429936353	hervdb4
190143402-MALR1018uL	1.30065659342555	3.38674439733799	0.867987959116388	3.90183338578301	9.54668622025431e-05	0.00943840435346445	hervdb4
060394902-HERV0749uL	3.37638474926766	3.3945515196696	0.703484960357534	4.82533630561822	1.3976722059054e-06	0.000240824334107891	hervdb4
190143401-MALR1018uL	7.97875326870963	3.39873008122615	0.568821745211463	5.97503543041001	2.30040182269801e-09	8.92936734354209e-07	hervdb4
062267602-HERV1036cL	2.49313724698679	3.39943645796078	0.842364934813878	4.0355863800431	5.44660959020772e-05	0.00584428790294069	hervdb4
170807401-HERV0474cL	4.99949464791913	3.41827693956579	0.64709434773417	5.28250161902209	1.27431709033918e-07	2.94809011126335e-05	hervdb4
020951601-MALR1024cL	3.04868916945945	3.42299206773734	0.746117557432925	4.58773826408054	4.48073907044881e-06	0.000671665689946931	hervdb4
110923402-MALR1004cL	3.57688792880861	3.4338294280999	0.672846692621114	5.1034351000868	3.33542932607144e-07	6.76086848559176e-05	hervdb4
220419302-MALR1126cL	2.97408305118076	3.43406807623048	0.794644625262426	4.32151425562893	1.54962037882175e-05	0.00196977752329203	hervdb4
170087201-HERV0541cL	3.06267982518121	3.43783015625786	0.703720283159238	4.88522249326717	1.03312122478219e-06	0.000185087107601403	hervdb4
170326102-HERV0556cL	1.57347717052458	3.44725348547981	0.863197965494909	3.9935838860595	6.50820386472936e-05	0.00683351559799814	hervdb4
180383806-HERV0539cL	3.67822724678599	3.44813768887816	0.797812375685964	4.3219907260945	1.54627689794294e-05	0.00196624774321787	hervdb4
010452902-HERV0615uL	1.78183797410063	3.44913663887672	0.745339939560716	4.62760205888008	3.69923947556315e-06	0.000568768313163458	hervdb4
072130301-MALR1127cL	2.57361490714394	3.44990107645733	0.814027751247445	4.23806322471265	2.25456285312728e-05	0.0027279581635015	hervdb4
012781601-HERV0487cL	7.2199146638394	3.46516004032843	0.598059096607331	5.7940094214528	6.87256004625044e-09	2.29839190662826e-06	hervdb4
190178901-MALR1004uL	1.34081598999007	3.4762921861422	0.891832845245255	3.89791899308913	9.70228584995395e-05	0.00955958897118404	hervdb4
041373202-MALR1004uL	2.10051818145014	3.49681197041276	0.858782059357804	4.07182699301808	4.66458210150666e-05	0.00510631949799634	hervdb4
010116702-MALR1133cL	3.87520017393155	3.51061505113297	0.717776188849385	4.89096058864892	1.00345057018782e-06	0.000180050370665242	hervdb4
052173904-HERV0940cI	2.94944307461007	3.51524515069203	0.810334644951401	4.33801661152331	1.43774290684549e-05	0.00184718823966502	hervdb4
062149605ERVHpol	2.8107276431353	3.53554127604914	0.70829452773192	4.99162585283631	5.98731502867987e-07	0.000114348820101953	hervdb4
111532102-HERV0741uL	1.80627981730413	3.53594197115544	0.807589106320424	4.37839235755181	1.19557966661335e-05	0.00157573131753955	hervdb4
170392402-HERV0911cL	2.59479822141944	3.57207195406156	0.913180738488382	3.9116812296923	9.1655838784254e-05	0.0091057569925313	hervdb4
060394901-HERV0749uL	1.04290768069873	3.57823248320534	0.884403061851915	4.04592955129828	5.21159056095846e-05	0.00562352660591979	hervdb4
150503202-HERV0500uL	3.16466145882797	3.59516164030037	0.873037944945192	4.11799012988613	3.82191060826995e-05	0.0043088999976668	hervdb4
161088902-MALR1042cL	1.72333301071174	3.60322765098199	0.779675086296867	4.62144772137817	3.81071368584003e-06	0.000584096229355216	hervdb4
110736102-HERV0371uL	6.33948860126632	3.63779422346955	0.617108736569509	5.89489989023969	3.74908606077088e-09	1.36088686695472e-06	hervdb4
060395901-MALR1017uL	4.2054604962054	3.64286610915431	0.755446312939761	4.82213765128905	1.42027875571972e-06	0.000244234456793785	hervdb4
050646701-HERV0914cI	1.35198183734667	3.64459676854445	0.933224924252705	3.90537872899497	9.40779286439171e-05	0.00930907407984378	hervdb4
010455504-HERV0890cI	6.5254817306084	3.64899496703371	0.645888526115185	5.64957391174179	1.60846017231552e-08	4.82844160031948e-06	hervdb4
060057702-HERV0797cL	10.3783666158364	3.65838623393815	0.553172459890799	6.61346415304252	3.75428943543346e-11	2.57473027645083e-08	hervdb4
020951602-MALR1024cL	2.38580837503878	3.66317309640464	0.853991504695109	4.28947252550535	1.79097966118039e-05	0.00223161853509091	hervdb4
052720701-MALR1126cL	2.67861555877919	3.66438543824771	0.796995509020528	4.59774916768487	4.27079722881871e-06	0.000644931268209168	hervdb4
170767802-MALR1006cL	1.30621166928782	3.66471653532754	0.923335126420268	3.96899937028877	7.21750725763696e-05	0.00744757469088665	hervdb4
010287401-MALR1022uL	2.74113815246649	3.67113981194593	0.920600354822305	3.98776710514579	6.66980912544758e-05	0.00697996731819306	hervdb4
110817901-HERV0625uL	11.6373624326287	3.67407161323059	0.494911353136832	7.42369636490191	1.13896100755664e-13	1.98614195398143e-10	hervdb4
141177101-HERV0765cI	2.15593809679425	3.67982650918093	0.801278586858633	4.59244333934778	4.38086473970423e-06	0.000659543462894647	hervdb4
170063801-MALR1022uL	2.60829704713282	3.68340876323021	0.825778344850288	4.46052961572637	8.17573593825894e-06	0.00113713181775335	hervdb4
160181902-MALR1004uL	1.93477845157282	3.69468368454364	0.868408482540204	4.25454582587243	2.09473757926474e-05	0.0025595627984382	hervdb4
043160702-HERV0567uL	1.4966124683865	3.69812432122089	0.935501543855371	3.95309269718599	7.71475324472166e-05	0.00789054672913558	hervdb4
070896702-HERV0740uL	13.5077559866293	3.698396083927	0.509624150911943	7.25710521628329	3.95462092720191e-13	5.67079567833721e-10	hervdb4
190153302-MALR1041uL	5.97019752280964	3.72436823350966	0.670735667190262	5.55266167536785	2.81352290882278e-08	7.87377999854582e-06	hervdb4
190200702-HERV0955uL	2.04072040264113	3.7253865550472	0.911792923130342	4.08578138801221	4.39287254843214e-05	0.0048594664703759	hervdb4
120503602-HERV0809cL	1.33373939693448	3.73067515436022	0.929163757436971	4.01508897059332	5.94233742288173e-05	0.00631193735074508	hervdb4
141259501-MALR1003uL	19.2895801882112	3.73282430859128	0.492976308952963	7.57201561373092	3.67477283475295e-14	7.50129217127039e-11	hervdb4
120179602-MALR1008uL	2.36082553870796	3.73404308714068	0.895976590103468	4.16756768913959	3.07867107250983e-05	0.0035761998900525	hervdb4
101437102-MALR1014uL	2.46635225423779	3.74086008008313	0.827239271990876	4.52210165395096	6.12286403868868e-06	0.00088568415119039	hervdb4
022524501-MALR1018uL	1.95029454870884	3.74175493344648	0.846677891077795	4.41933700274533	9.90041596900336e-06	0.00134100013644166	hervdb4
040028102-MALR1003cL	3.14196794463883	3.75610410582562	0.807663058450525	4.65058302038921	3.30997965422295e-06	0.000515311413014108	hervdb4
012841502-MALR1010cL	1.61301250161857	3.76252220498038	0.828178999115505	4.54312679867366	5.54258888696463e-06	0.000809507237186223	hervdb4
040028101-MALR1003cL	3.87473935758641	3.76979754812576	0.68408021827654	5.51075363299253	3.57300541903474e-08	9.72473992559558e-06	hervdb4
170464702-MALR1017uL	7.05418909488574	3.77219635226862	0.662272361924424	5.6958384029607	1.22767117319116e-08	3.81402372892388e-06	hervdb4
060564202-MALR1127cL	2.91907460572495	3.7745708363466	0.840385857276715	4.491473534048	7.07320915001931e-06	0.00100555911865564	hervdb4
100445002-HERV0810uL	2.07724970656834	3.7884934725963	0.877312687240184	4.31829326954565	1.57240407129809e-05	0.00199581441412533	hervdb4
023471802-MALR1045cL	2.62984066663323	3.79922732853601	0.890602968297123	4.26590463290317	1.990938178776e-05	0.0024560802232451	hervdb4
160684301-MALR0820cL	3.02373527256021	3.79968076576475	0.862111423172545	4.40741261933641	1.04612782544366e-05	0.00140762806508514	hervdb4
190510501-HERV0707cI	6.45366296122754	3.81850497260417	0.683359488376704	5.58784217904823	2.29908435539882e-08	6.58817715120148e-06	hervdb4
170644802-HERV0489uL	5.51717283142525	3.81878781756716	0.624414782899656	6.11578700913114	9.60815851004423e-10	4.2911495059917e-07	hervdb4
110798902-MALR1020uL	3.29402022805552	3.81942165767926	0.763870278611387	5.0000919850193	5.73029694800086e-07	0.000110167736670097	hervdb4
010117201-HERV1036uL	3.80655791155965	3.8249580218342	0.777662220295572	4.91853393672695	8.71948016145895e-07	0.000159758923211694	hervdb4
061238401-MALR1045cL	3.77672061766387	3.86756474948656	0.748809091287332	5.1649543181127	2.40497651411917e-07	5.11695248270776e-05	hervdb4
012713401-HERV0801cL	1.83240042319617	3.87661855862522	0.976519606535435	3.96983177058673	7.19233952491707e-05	0.00742823113671643	hervdb4
220267701-MALR1023uL	4.66975747569252	3.88234802978367	0.705042388562325	5.5065455535238	3.65943303316652e-08	9.92882291766571e-06	hervdb4
160023801-HERV0527uL	6.69296476635945	3.89319637177381	0.704605503826881	5.52535617537605	3.2881784960345e-08	9.06325418343045e-06	hervdb4
021012903ERVF3LU3p	21.7709740363326	3.89431799794871	0.473551356654203	8.2236444753603	1.9741070920701e-16	9.25749517689411e-13	hervdb4
120910002-MALR1046cL	2.0241818295554	3.89942487229241	0.85659843481322	4.55222040318423	5.30826816289279e-06	0.000779879431789608	hervdb4
161089601-MALR1004uL	7.55793541266129	3.9362789295932	0.641577604861826	6.13531223621956	8.49920963698532e-10	3.87568426836616e-07	hervdb4
042905301-HERV0489uL	1.74788812619548	3.95408790764093	0.993645074613383	3.97937654869313	6.90962281286649e-05	0.00718055448708565	hervdb4
121214601-HERV0584uL	1.75485258450504	3.96153921736079	0.928962364558137	4.26447762417707	2.00370421651458e-05	0.0024709503810053	hervdb4
180384602-HERV0490uL	1.84010071522815	3.96606372820333	0.97337180967932	4.07456193898811	4.6101042582552e-05	0.00505625278034046	hervdb4
140660902-MALR1126uL	4.10788188947067	3.97000202677086	0.791418658136434	5.01631088167555	5.2673074101824e-07	0.000102058124929173	hervdb4
0X1170401ERVH5LU3I	2.24885166909174	3.9726356466869	0.999362688126444	3.97516906913405	7.03292761220168e-05	0.00728678855230127	hervdb4
080440601-MALR1008cL	2.04266748352005	3.97482841128327	0.956628041929754	4.15504066059475	3.25229700497216e-05	0.00375203492907393	hervdb4
082062301-MALR1022uL	8.45446319001001	3.9776384973375	0.5700395773083	6.97782865554655	2.99776944200126e-12	3.01532159931385e-09	hervdb4
210442501-HERV1036uL	3.00913530566631	3.97844571601614	0.991201809683373	4.0137595363017	5.97592269661767e-05	0.00633791165703015	hervdb4
101651702-HERV0463cI	1.42845345745444	3.97994643836495	0.978927232753645	4.0656203088453	4.79048737278264e-05	0.00522601360610824	hervdb4
050852402-HERV0513uL	6.04955752118873	3.98517083002667	0.656830641719118	6.06727301819586	1.30100293473038e-09	5.55318620430673e-07	hervdb4
070073501-MALR1026cL	5.44094572084306	3.98553559821445	0.620729976954535	6.42072357737342	1.35628112180571e-10	7.96373392367205e-08	hervdb4
070870403-HERV0884uL	2.85129620053291	3.99615368687237	0.828801618415893	4.82160458917817	1.42408020197497e-06	0.000244766870574221	hervdb4
020950502-HERV0418cL	2.47150010923605	3.99690056404929	0.930000291035874	4.29774119704562	1.72547458091124e-05	0.0021632015501005	hervdb4
080299501-HERV0555uL	1.92500140054051	4.0019430379483	0.897183241598822	4.46056374260474	8.17443405629185e-06	0.00113713181775335	hervdb4
180383805-HERV0539cL	1.6773154604082	4.00727714656019	1.0118542327901	3.96033046727539	7.48461136460033e-05	0.00768434862646037	hervdb4
041308501-MALR0819uL	2.68210903815413	4.03226862458492	0.98731177324406	4.08408846512171	4.42501719313144e-05	0.004884126801401	hervdb4
170015201-HERV0900uL	3.57852407075791	4.03736773147041	0.968421219108067	4.16902031038611	3.05911730853853e-05	0.00355636478528991	hervdb4
011686402-MALR1023uL	7.16152545676106	4.03823810226385	0.654231283930672	6.17249312506398	6.72214520788363e-10	3.13959465685031e-07	hervdb4
130153201-HERV0949cL	9.32715697597512	4.04036827472751	0.693547291583552	5.82565648191384	5.6888525953782e-09	1.94218595286595e-06	hervdb4
041046502-HERV0517cL	5.65008074806829	4.04456959647618	0.757067080645227	5.34241905357859	9.17143303648486e-08	2.2318868810105e-05	hervdb4
032966501PRM4pol	10.1342525343288	4.0447404911859	0.570654275073941	7.08790009618663	1.36162203456001e-12	1.58221623492271e-09	hervdb4
0X0352702-HERV0815cI	5.58035261995932	4.0448684557554	0.769681586548851	5.25524908799241	1.47824263019656e-07	3.33971196309121e-05	hervdb4
120433101-HERV0909cL	3.49125972464551	4.04543648048469	0.767578049504866	5.27039104765208	1.36133414259224e-07	3.11616209869631e-05	hervdb4
141306501-HERV0942uL	6.74354463421393	4.06286371145733	0.741328540678006	5.48051705623192	4.24084629062981e-08	1.1337892756351e-05	hervdb4
100244001-MALR1017uL	2.41787756403312	4.0689404977369	1.04632892287293	3.88877761934051	0.000100750379421695	0.0098624532205689	hervdb4
170687501-MALR1126cL	3.15991881576161	4.06973644792258	0.852513863214782	4.77380676552969	1.8077584345035e-06	0.000301600159587214	hervdb4
071802001-MALR0819cL	1.75870761363112	4.07051653036917	0.923840498134384	4.40608150280186	1.05257372197581e-05	0.00141410814169588	hervdb4
030256401-MALR1022uL	3.94502553369603	4.07322313295323	0.840886307349894	4.8439641570455	1.27273901972385e-06	0.000222277752704867	hervdb4
032966802-HERV0911uL	3.21097256588796	4.07727079926517	0.853629286389905	4.77639516857302	1.7846552198896e-06	0.000298175760426619	hervdb4
190147902-MALR1017uL	10.3251055466348	4.08600825614587	0.569188149456664	7.17866009692278	7.03979222395236e-13	9.35995669561666e-10	hervdb4
161088201-MALR1022uL	3.72294728571178	4.10244421489254	0.698934303313391	5.86957056685351	4.36925357540867e-09	1.54956158752034e-06	hervdb4
220336401-MALR1003cL	2.65689136368657	4.105157757664	0.83777335123271	4.90008156934523	9.57968743824357e-07	0.000173233097176617	hervdb4
120029302-MALR1023uL	2.27395403655241	4.10963866091536	0.857251456126531	4.79397104728718	1.63511882804767e-06	0.000276116270418055	hervdb4
170685601-HERV0557uL	2.00467519879778	4.1105317085192	0.965605403425027	4.25694770756154	2.07236803457756e-05	0.0025393826107313	hervdb4
101036902-HERV0466cL	1.60240933971394	4.11399016154778	0.960061454364137	4.28513210570727	1.82630633299716e-05	0.00227237297840328	hervdb4
190054901-HERV0534uL	2.05396443938145	4.13393965001501	1.06411720463688	3.88485369092934	0.00010239153121132	0.00999491115638603	hervdb4
170685301-HERV0488cL	6.05496251710624	4.15302701703541	0.778714212375538	5.33318507744481	9.65048609287974e-08	2.31919091686366e-05	hervdb4
141258401-HERV0740uL	2.30909403178021	4.15370703931167	1.06912946275721	3.88513008387172	0.000102275110954699	0.00998635593795715	hervdb4
220301702-MALR1044cL	1.41729753971059	4.16010726988578	1.05335946366768	3.94937095395786	7.83568401605778e-05	0.00799276621767305	hervdb4
170451402-MALR1009uL	1.48729369280264	4.16441104671995	1.04828137248534	3.97260807644292	7.10899639086346e-05	0.00734652747932531	hervdb4
031167201-MALR1004cL	1.54454868163145	4.17275016066982	1.06487486543724	3.91853568537039	8.90885413513076e-05	0.00891193589499302	hervdb4
190011701-MALR1014cL	7.44810637060651	4.17370935137004	0.626487807872741	6.66207593974096	2.69986450045922e-11	1.97659700200286e-08	hervdb4
010790301-HERV0958cI	4.79538358433118	4.18535830169131	0.725847622876767	5.76616657515994	8.10949095187615e-09	2.65988237251424e-06	hervdb4
121747302-MALR1022uL	4.48350954768918	4.2046860806802	0.811056251756573	5.18421018464965	2.16932183207983e-07	4.67867036773365e-05	hervdb4
020405501-HERV0950uL	4.22661845206629	4.23728375547808	0.769140085616022	5.50911834491676	3.60635397071046e-08	9.80013277146393e-06	hervdb4
010229102-MALR1018uL	2.23179720082995	4.24160482501151	0.869500181129887	4.87821039841497	1.07052698633949e-06	0.000190803428248347	hervdb4
160407202-HERV0602cL	2.00417882480408	4.25784141032526	1.06325697872162	4.00452712329674	6.21416612768808e-05	0.00657250816711465	hervdb4
072097106-HERV0468cL	3.74979619741315	4.26004095124553	1.03895523610773	4.10031231682806	4.12592936731385e-05	0.00459935756198283	hervdb4
120641002-HERV0548uL	1.72962492331767	4.26558906754736	0.947042373297062	4.50411638150573	6.66496754392956e-06	0.000952585270631975	hervdb4
130477802-MALR1004uL	3.92554046386375	4.27966449040881	0.87837999853795	4.87222443308391	1.10348710777589e-06	0.000195973437124047	hervdb4
141079501-MALR1044uL	1.95753696954931	4.31448808712431	0.897719098552962	4.80605580752248	1.53936945897833e-06	0.000261474297432531	hervdb4
200159701-HERV1029cL	1.72385381075471	4.31592965021502	1.03754181577698	4.15976453631701	3.18575850943611e-05	0.00368261798116096	hervdb4
060278901-HERV0923cL	2.29106760885241	4.31878526054692	0.925074510843173	4.66858097366719	3.0328724138514e-06	0.000476014194959164	hervdb4
110108402-HERV0741cL	3.55238568519971	4.32591041212133	0.919268551239181	4.70581790956514	2.52850135980482e-06	0.000404536902664578	hervdb4
220337001-HERV0462uL	2.49714157744465	4.34648538472531	0.978539722242183	4.44180781416411	8.92062193033973e-06	0.00122405465490965	hervdb4
051845202-HERV0426uL	1.76597635912747	4.36915517298097	1.07180755225519	4.07643626300994	4.57311831202545e-05	0.00502044769578954	hervdb4
090082401-HERV0466uL	1.91700053140175	4.37050230483027	0.974569118375354	4.48454832235612	7.30685465515441e-06	0.00103494885813538	hervdb4
012383401-MALR1044uL	3.80084957865196	4.37347124092393	0.886689924386041	4.93235698370227	8.12432612675521e-07	0.000150764901203561	hervdb4
160917301-HERV0749uL	9.2051999877628	4.40657405472957	0.688742353353079	6.39800069398457	1.57424572457558e-10	9.01943499853526e-08	hervdb4
052799301-HERV0700cI	5.27652572107689	4.42796529673666	0.731933930991401	6.04967895222319	1.45134768785209e-09	6.1196436772592e-07	hervdb4
061681701-HERV0763cL	1.57817609635796	4.4500992962762	0.971798865945499	4.57923903002967	4.66670646978648e-06	0.000696533539417335	hervdb4
080090603-HERV0501uI	3.54370645986884	4.45082731384764	0.870230449948309	5.11453869961918	3.14508607813314e-07	6.43518732802926e-05	hervdb4
061681801MR41sLU3	4.17535910556472	4.45246315273462	0.896338890361685	4.96738811694089	6.78606863592746e-07	0.00012819278922371	hervdb4
022591601-HERV0602uL	2.00633779871606	4.4560637918099	1.09601857583913	4.06568272658905	4.78920531389182e-05	0.00522601360610824	hervdb4
130446201-MALR1041uL	5.47801838810625	4.47695353270713	0.692209844197451	6.46762476759878	9.95553335543469e-11	6.10383248233736e-08	hervdb4
111022802-HERV0490uL	1.99714080056811	4.4860040598501	1.06105617939008	4.22786667377852	2.35917511691559e-05	0.00283476782919684	hervdb4
010911101-MALR1018cL	7.5487529927326	4.48888409214481	0.645404992580434	6.95514311749824	3.52204299035655e-12	3.4235836372928e-09	hervdb4
012024102-MALR0819uL	11.1470969250973	4.49496215248192	0.5924467292651	7.58711615820327	3.2710383232708e-14	6.92975557624691e-11	hervdb4
170205901-HERV0758uL	2.08743111961923	4.4972698656172	1.06346695435837	4.22887598640108	2.34861755572595e-05	0.00282599606167829	hervdb4
082076002-MALR0820cL	2.08319200286461	4.50140195294113	1.11970920312858	4.02015267925258	5.81604362853444e-05	0.00619865927510448	hervdb4
090763302-HERV0379uL	3.26519009292098	4.50410682570455	0.991881584515082	4.5409723257505	5.5995382212033e-06	0.000817136986342291	hervdb4
121260702-HERV0537cL	3.90665282681016	4.51066198065411	1.06746009715307	4.22560243018368	2.38302396643568e-05	0.00286088257004376	hervdb4
121304302-MALR1018cL	4.95068535611177	4.51811382864747	0.762407227770167	5.92611620677012	3.10183123645777e-09	1.1499973030722e-06	hervdb4
030643602-MALR1002cL	4.96590609870643	4.5181140636174	0.776694470248193	5.81710600073364	5.98751756755767e-09	2.03306100420143e-06	hervdb4
100088801-MALR1023uL	1.8009856143356	4.52760166874287	1.12344222799819	4.03011526174373	5.57495091510433e-05	0.0059673641781601	hervdb4
012022304-HERV0198cI	9.56827273859325	4.52902638346646	0.630177292746312	7.18690824883417	6.62749141915316e-13	8.84566181644050e-10	hervdb4
170768702-HERV1035cL	3.17521697258969	4.53975671041045	0.919064421189303	4.93954134851161	7.83065381219045e-07	0.000145861164031472	hervdb4
012842302-HERV0797cL	6.42008017041884	4.5413244302861	0.763644748128667	5.94690717302088	2.73256267570661e-09	1.02959163922227e-06	hervdb4
070022801-HERV0590uL	2.95238615624342	4.54398163914986	0.845738142727216	5.37279969955839	7.75234291085762e-08	1.92295785341373e-05	hervdb4
170097502-HERV0741cL	1.99800206097862	4.55168001468145	1.05002012030859	4.3348502820534	1.45859359706629e-05	0.00187120573032882	hervdb4
160389401-MALR1045cL	2.15247368626418	4.55781137143398	1.07170691948358	4.2528524250177	2.11064676842405e-05	0.002574469741928	hervdb4
061528901-MALR1003cL	4.7177398400211	4.58121520022318	0.771596591985795	5.93731912220203	2.89720397852967e-09	1.07990088574583e-06	hervdb4
220140001-HERV0972cL	4.47758390372936	4.59804158063091	0.826152211523814	5.56561069073452	2.61235890651589e-08	7.37025030682231e-06	hervdb4
190567702-HERV0911uL	1.76071454386113	4.60619546652588	1.09587502747224	4.20321236551086	2.63153485233097e-05	0.00311458125667085	hervdb4
031930002-MALR1014uL	3.76677403533524	4.62024153893237	0.970308653211758	4.76162046338472	1.9204460649356e-06	0.000316595341308291	hervdb4
081906202-MALR1020uL	3.46027963026529	4.62739078708446	0.881023508609816	5.25228979915202	1.50219857007894e-07	3.38721863410522e-05	hervdb4
042695702-MALR1022uL	22.2703407810053	4.6307212666164	0.607697694880458	7.62010668401058	2.53466142335945e-14	5.82502123929932e-11	hervdb4
101770302-HERV0549cL	3.96521699908854	4.63286645682404	0.911488466726144	5.08274830230626	3.72012521235014e-07	7.460574507977e-05	hervdb4
090481801-HERV0509uL	3.86545684752847	4.64181651992768	1.07101541562201	4.33403334090375	1.46401987523842e-05	0.00187747293830465	hervdb4
060559402-MALR1014cL	2.60593857211148	4.64887389207258	0.943518191055308	4.92716932873641	8.34294497568613e-07	0.000154244473386393	hervdb4
052679101-HERV0116cL	2.12033026963517	4.65161064944806	1.14659600819354	4.05688718276342	4.97310888006431e-05	0.00538965722535889	hervdb4
041873802-MALR0819uL	2.41675698274749	4.65168241847445	1.14508166836471	4.06231498327759	4.85884544362767e-05	0.0052806656619094	hervdb4
090294401-MALR1127uL	2.04646392127349	4.65373085096359	1.1213652183695	4.15005813871263	3.32390837218019e-05	0.00381941285865553	hervdb4
011789102-MALR1130uL	3.79332079762573	4.65465084656814	0.951060475554887	4.89416915769992	9.87218992507657e-07	0.000177873694070616	hervdb4
160169002-MALR1134cL	2.53246500967255	4.65527769166742	1.13246522976573	4.11074668723422	3.94381680016421e-05	0.00442620732856722	hervdb4
062258101-HERV0501uI	2.70423828685311	4.6662192125956	1.13848859931792	4.09860864253818	4.15641133170515e-05	0.0046273912747139	hervdb4
140179104-HERV0700cI	2.67197906220254	4.66882083549579	1.10562476063581	4.22278968572563	2.41296961964121e-05	0.00288940206144891	hervdb4
011693902-HERV0400cL	8.05907417072291	4.68710841019083	0.811038410094023	5.77914479987138	7.50812875536599e-09	2.4908899050546e-06	hervdb4
070029302-HERV1030cL	14.2116355756723	4.68779484282319	0.611286356905612	7.66873788342543	1.73696979933861e-14	4.15698799838954e-11	hervdb4
140671102-HERV0900cL	5.35270569276167	4.6921311958243	0.726674951977599	6.45698765734937	1.06807604891407e-10	6.50252193849404e-08	hervdb4
030210801-HERV0118uI	6.15252869725943	4.6971811835335	0.710436787455825	6.61168068218254	3.79980956930649e-11	2.59058922738849e-08	hervdb4
160174202-MALR1008cL	2.817216458559	4.70105829372812	1.01632008422149	4.62556862420874	3.73572089517299e-06	0.000574123058034956	hervdb4
110041602-MALR1044cL	3.27426540104719	4.71213211115034	0.896693685748197	5.25500757509913	1.4801837888784e-07	3.34192178540393e-05	hervdb4
190032002-MALR1022uL	19.5239935219521	4.72320499818201	0.552184250111083	8.55367569290837	1.19229592680491e-17	7.5227369549062e-14	hervdb4
190191301-HERV1034cL	7.37590447711623	4.73227694536186	0.874920380108212	5.40880867899838	6.34453612380602e-08	1.62007426466752e-05	hervdb4
052292801-HERV0863uL	1.98852871995359	4.73747204204717	1.19598018204754	3.96116266235828	7.45856991537051e-05	0.00766441496011807	hervdb4
042695801-HERV0600uL	11.68166034873	4.74304352928837	0.730865325213394	6.48962724822596	8.60490027756912e-11	5.39002255292786e-08	hervdb4
220130402-MALR1041uL	4.72101217667044	4.75804974395716	0.816319787227757	5.82865908483686	5.58745164117026e-09	1.91701271994929e-06	hervdb4
082074602-HERV0513uL	14.8109457091406	4.76490388015386	0.699756791119602	6.80937139964026	9.80261140024691e-12	8.28750221678983e-09	hervdb4
060559501-MALR1002cL	3.21011706709924	4.78165121704657	0.902129072484233	5.30040696269673	1.15544834814773e-07	2.70816593119336e-05	hervdb4
110956401-HERV0741cL	3.15904583537439	4.78912228182709	0.930704678960716	5.14569485905553	2.66532370190623e-07	5.57516956621759e-05	hervdb4
0X1138104-HERV0184cI	2.22121983998477	4.79321741218808	1.14645929422437	4.18088756952412	2.90373422146213e-05	0.00339049074539632	hervdb4
131353202-HERV0496cL	5.90815812707131	4.79637737694297	0.81499930617598	5.8851306259975	3.97739729165898e-09	1.43029679601192e-06	hervdb4
052783704-HERV0700cI	5.92892014053337	4.7998431531522	0.733920534874637	6.54000389016514	6.15172331775316e-11	4.03495406226653e-08	hervdb4
150654601-HERV0750cL	5.26091422232659	4.80466916183896	0.930864971433475	5.16151032564912	2.44965376184753e-07	5.20244093290288e-05	hervdb4
110041002-MALR1022uL	9.39968197780772	4.80485621140716	0.848966725135995	5.65965198534427	1.51680267213716e-08	4.58502494150729e-06	hervdb4
012303202-HERV0869uL	2.19112378644924	4.80678653363414	1.14701353518087	4.19069730757462	2.78098459112522e-05	0.00326916420329361	hervdb4
012036302-MALR1041cL	2.44243174195532	4.80850178155315	1.16570774165825	4.12496341039388	3.70793700237918e-05	0.00419395808665684	hervdb4
121318902-HERV0566cL	1.81380217110004	4.8162389522133	1.1800944247919	4.08123184978406	4.4797640487072e-05	0.00493043996251941	hervdb4
110996402-MALR1041cL	9.44088381681472	4.82040057801515	0.729594411454049	6.6069592945597	3.92293846073199e-11	2.66929040126121e-08	hervdb4
081922103HADPgag	2.1929721118134	4.82552721261037	1.12227871128556	4.29975830788305	1.70984479311691e-05	0.00214748584910399	hervdb4
110063401-MALR1127uL	3.91791285955843	4.83371833667858	0.906001296600805	5.33522231680467	9.54275640128947e-08	2.29807586840768e-05	hervdb4
010405401-MALR1127cL	3.20578061829634	4.83936022444739	1.09806325963919	4.40717798538999	1.04726129072331e-05	0.0014080612673646	hervdb4
030087601-MALR0818uL	2.79348677195304	4.84736602797333	0.961805704875669	5.03985992534734	4.65872697878798e-07	9.14314791654442e-05	hervdb4
130327301-HERV0817uI	3.44868977419382	4.87497241502873	0.916034711609003	5.32182061798281	1.02733850614049e-07	2.45106167171654e-05	hervdb4
140464801-MALR1018cL	1.76708005590824	4.87944604610565	1.25359794619393	3.89235325482164	9.92765491128272e-05	0.00974586723547057	hervdb4
021418002-MALR1003uL	2.35579952156485	4.88083271572849	0.966390043626768	5.05058257575916	4.40464649610875e-07	8.69949019396505e-05	hervdb4
091701801-HERV0492cL	2.41596656791996	4.93860484236675	1.16192037489217	4.25038147973355	2.13406736627459e-05	0.0026002951455218	hervdb4
160491102-MALR1041cL	5.95575377274198	4.95336355039558	0.799607484303212	6.19474385574568	5.8379891052832e-10	2.77520408125394e-07	hervdb4
081817102-HERV0491uL	2.42475344469387	4.96905881300005	1.1867826306572	4.18699994812729	2.82665890250703e-05	0.00331499551317334	hervdb4
071802002-MALR0819cL	2.70102058237129	4.9696830568022	1.17078806223623	4.24473328444262	2.18853578084699e-05	0.00265733270353227	hervdb4
160500801-HERV0813uL	17.05689651063	4.98725873877942	0.683029920341738	7.30166950268322	2.84218721533894e-13	4.3069685915586e-10	hervdb4
150923401-HERV0740uL	4.46507061752617	4.98999157051823	1.03364661231567	4.82756051349038	1.38215696980164e-06	0.000238862605408647	hervdb4
021033201-HERV0897uL	2.09031736763132	4.99380768846305	1.15229298360517	4.33380030904897	1.46557124228951e-05	0.00187848389376984	hervdb4
170313201-MALR1003cL	2.50274507585785	4.99426954099441	1.16236024254564	4.2966623927679	1.73388958744218e-05	0.0021729662861473	hervdb4
032893602-MALR1045cL	2.2533217540541	5.00697180485141	1.23243905703155	4.06265265311472	4.85181984710893e-05	0.00527633507785566	hervdb4
101045002-HERV0750cL	5.53732048384013	5.01755642718499	0.925014997604073	5.42429737915732	5.81829473495052e-08	1.49893440157574e-05	hervdb4
170088601-MALR1127cL	2.50565119260879	5.01935299748281	1.19973233931475	4.18372734734293	2.86768022805839e-05	0.00335290563591921	hervdb4
020146201-HERV0415cL	8.87517976582348	5.05383255410406	0.855698536642577	5.90608998109697	3.50322678873469e-09	1.28102187589748e-06	hervdb4
160030201-HERV0902cL	2.85361376251395	5.05862590237599	1.16815145744519	4.3304537867371	1.48802373662697e-05	0.00189983074718282	hervdb4
042552102-HERV0415uL	1.89780828366302	5.08081307115197	1.29088261791883	3.93592182637279	8.28779499869493e-05	0.00839471868198223	hervdb4
021295702-HERV0739uL	2.35633740345903	5.09238134793723	1.29431279742759	3.93442864665958	8.33948380620079e-05	0.00843968407823796	hervdb4
130168502-MALR1022uL	2.02336495309655	5.09278213152961	1.20547866990726	4.2246970092979	2.39262464936676e-05	0.00286999172424214	hervdb4
130118901-MALR1004cL	3.10897501308674	5.1044204633477	0.934457857457988	5.46244051843417	4.69632916408753e-08	1.24311223990973e-05	hervdb4
190228401-HERV0572uL	2.82727588607865	5.11339023836389	1.06861186812455	4.7850771555982	1.70921661521935e-06	0.000287370324522005	hervdb4
100410302-MALR1044cL	1.97185362787969	5.120976088318	1.16492925327253	4.39595458173285	1.10286994720815e-05	0.00146860295119022	hervdb4
060168002-MALR1020uL	6.29553314165179	5.1294326872397	0.848587798954621	6.04466938313121	1.49716691780462e-09	6.25960076887421e-07	hervdb4
071029405-HERV0901cI	1.86323445675993	5.13941338222281	1.18097572796952	4.35183658775032	1.35001869799339e-05	0.00174872522798681	hervdb4
021417501-MALR1043cL	12.3464395139138	5.14580031397813	0.725130300005822	7.09638021461359	1.28066845512088e-12	1.51678350612985e-09	hervdb4
013053602-HERV0557cL	5.53030761015598	5.16121894622472	0.84630282032985	6.09854867813523	1.07035804147809e-09	4.70767614136538e-07	hervdb4
210491902-MALR1003cL	3.40096860416281	5.18643359627081	1.32114269666877	3.92571794806745	8.64714332508754e-05	0.00869525261278435	hervdb4
111317202-MALR1018uL	3.37757256927919	5.1960460496974	1.04410808542149	4.97654038144895	6.47307771827493e-07	0.000122815059037494	hervdb4
052171101-MALR1015uL	6.50037748537285	5.21114426153512	0.894332794825725	5.82685135967825	5.64828770350466e-09	1.93300670500019e-06	hervdb4
210465202-MALR1046cL	25.7406442678529	5.2429653261624	0.582124473367817	9.00660522968534	2.12533488618207e-19	1.99333435730514e-15	hervdb4
160386402-MALR1026uL	3.91963642504151	5.24881688120289	1.22039204983821	4.30092680618391	1.70085237784482e-05	0.00213773919652194	hervdb4
150406802-MALR0818uL	2.60686683905288	5.25027561153905	1.13798931574098	4.61364227143067	3.9567320062688e-06	0.000604068034051497	hervdb4
052679102-HERV0116cL	3.02469238130802	5.27455592452371	1.08795454342919	4.84813998560868	1.24624449759946e-06	0.000218089644758933	hervdb4
023470701-HERV0422uL	2.38175604245809	5.27760123926824	1.35277310765175	3.90132033924706	9.56694512701087e-05	0.00945038798171168	hervdb4
201042302-MALR1015uL	6.54692402084616	5.2828985545801	0.898994827889314	5.87645044297244	4.19156810147200e-09	1.49944263489531e-06	hervdb4
0X1486201-MALR1026uL	3.61421579919756	5.2871848092788	0.90423500109357	5.84713575882878	5.00109341526878e-09	1.74045458311811e-06	hervdb4
020904801-HERV0760cL	3.74081524814869	5.288508142463	1.14163955607641	4.63237990862771	3.61486027007349e-06	0.000557771814549089	hervdb4
042653201-HERV0415uL	3.3972344964861	5.29504114693927	1.076050374365	4.92081158381083	8.61860717062252e-07	0.000158328695624639	hervdb4
011269601-HERV0572cL	5.6351212092774	5.30312230161699	0.907768917257943	5.84192981363131	5.15995471029164e-09	1.7888186649005e-06	hervdb4
190048001-MALR1127cL	4.35292338990135	5.30341049739136	0.848906025191096	6.24734698543047	4.17482933163339e-10	2.07854989191308e-07	hervdb4
020354902-MALR0819uL	3.21907262975214	5.31325996944198	0.887941934513576	5.98379214103977	2.18001486002777e-09	8.55779136568819e-07	hervdb4
032667002-MALR1026uL	4.51013576846144	5.31371595519843	1.22193801091159	4.34859698916666	1.37011223708964e-05	0.00177012787980212	hervdb4
020798401-HERV0617cL	4.45229764643693	5.35059495374743	0.958939738159286	5.57969884950023	2.40935363038142e-08	6.84827348715706e-06	hervdb4
141128501-HERV0590uL	7.90652249726619	5.35633888332701	0.865943893302807	6.18554957746435	6.18864808925639e-10	2.913954762461e-07	hervdb4
180147702-HERV0741cL	2.7268297261218	5.43321455350986	1.25371223529031	4.33370146718857	1.46622973729913e-05	0.00187848389376984	hervdb4
200159702-HERV1029cL	4.06531800201709	5.4416326647169	1.1698958749589	4.65138204278914	3.29717851458814e-06	0.000513548872590834	hervdb4
031889901-MALR1134cL	6.14999598486631	5.44386871225584	1.0369473446022	5.24989888888161	1.52182719356138e-07	3.4270244822172e-05	hervdb4
121422002-MALR1022uL	3.05277828413405	5.44431742644293	1.16663036862741	4.66670298738102	3.06071262748906e-06	0.000479732834684396	hervdb4
042921802-MALR1042cL	2.66352251746275	5.44772416486719	1.3991711794551	3.89353657712474	9.87932982201933e-05	0.00970921845040257	hervdb4
052681501-HERV0378uL	4.51165308141784	5.45836969266377	1.17718209904592	4.63680996940717	3.53827428240508e-06	0.000547659206726232	hervdb4
012040102-MALR1024uL	4.25212086526692	5.46305290744736	0.968352074646546	5.64159777262976	1.68479321822238e-08	5.01421048531329e-06	hervdb4
170686601-MALR1005cL	3.38393048069988	5.47349406776442	1.25032289214215	4.37766444345174	1.1995784731208e-05	0.00157980160054035	hervdb4
100874801ERVFsLU3p	3.85897342349719	5.47662629942759	1.10575104877123	4.95285652725677	7.31318963048794e-07	0.000137253816418168	hervdb4
190194102-MALR1004uL	2.8763514218445	5.47961747163093	1.05349495197116	5.20137041129451	1.97824385153021e-07	4.32026545851487e-05	hervdb4
170615001-HERV0923cL	3.02926473505836	5.48216128037524	1.40111743424251	3.91270649154335	9.12674381090877e-05	0.00907236504514914	hervdb4
060542601-HERV0462uL	2.5376131917837	5.50199715407572	1.29164672155495	4.25967647519915	2.0472300863315e-05	0.00251479569755312	hervdb4
170392401-HERV0911cL	3.15047587341992	5.50371985822885	1.06538431872925	5.16594787578014	2.39223456458338e-07	5.0929646539983e-05	hervdb4
140675702-HERV0462uL	3.05442774281027	5.50598802261705	1.30876137611909	4.2070220920976	2.58757854295283e-05	0.00307303732366698	hervdb4
041009701-MALR1132cI	11.6440389188543	5.5119549057738	0.738285889129612	7.46588142470394	8.27438347135483e-14	1.49771341003246e-10	hervdb4
161089602-MALR1004uL	5.43905511459484	5.54456063660185	1.07131882825307	5.17545336680306	2.2735821464512e-07	4.87625758010813e-05	hervdb4
130118902-MALR1004cL	3.52954694158451	5.56249205534318	1.27183082513118	4.37361003164037	1.22208603976953e-05	0.00160639506636674	hervdb4
120641201-MALR1015cL	8.50430307412583	5.56290265550361	0.936882146086389	5.93767602333054	2.89090593227941e-09	1.07871201787054e-06	hervdb4
190103501-HERV0955uL	3.29542078574018	5.57679430537122	1.18747535449195	4.6963453045787	2.64857652233757e-06	0.000421609644395222	hervdb4
020893902-MALR0819uL	3.24313725114614	5.57911178475653	1.26576119676674	4.40771276525761	1.04467959385274e-05	0.00140622464181062	hervdb4
100122202-MALR1023uL	3.06358650491006	5.58389543496795	1.13664493765761	4.91261188958025	8.98710651487485e-07	0.000163797568423943	hervdb4
052493402-MALR1004cL	2.62388989065232	5.62126509767605	1.4215990358812	3.95418465811747	7.6796083086309e-05	0.00786129107746635	hervdb4
170647902-MALR1014cL	2.78672831941319	5.62645921893116	1.17974700165206	4.76920832267608	1.84951321710693e-06	0.000307089988804041	hervdb4
220014502-MALR1126cL	10.13541967492	5.63320348428014	0.794995019583012	7.08583493672054	1.38208466586069e-12	1.59339209550491e-09	hervdb4
060169702-MALR1046cL	3.03009092637492	5.63548710534447	1.37419088542774	4.10094926775063	4.11458767794726e-05	0.00458966318226056	hervdb4
030726502-MALR1007cL	4.26465216596439	5.64015643776853	1.12918508173412	4.99489103159845	5.88689973665814e-07	0.000112616976108881	hervdb4
100442501-MALR0820uL	2.68455446061076	5.65057779064084	1.41556515476579	3.99174688047173	6.55883590738076e-05	0.00687419884197908	hervdb4
012036002-MALR1004cL	7.26184658764153	5.67949746232388	0.940124286785831	6.04121980694849	1.52953438381228e-09	6.36306610179407e-07	hervdb4
160684302-MALR0820cL	11.7743906107654	5.68408853533139	0.882241971975823	6.44277728319998	1.17306776961631e-10	7.01858581745264e-08	hervdb4
141292502-MALR1045cL	3.89441776717154	5.70513764006161	1.22231815082604	4.66747355114221	3.04925987162005e-06	0.000478153710189603	hervdb4
200146401-MALR1046uI	9.12033477351599	5.70906432792884	0.836273504460147	6.82679087341683	8.68351332147243e-12	7.45879404162713e-09	hervdb4
081521202-HERV0422uL	3.22558701777913	5.71019503182727	1.23873227691266	4.60970876294514	4.03233444232401e-06	0.000613997673617937	hervdb4
020405502-HERV0950uL	32.0880423465916	5.71858588236136	0.662597054002542	8.63056339870087	6.1050501457595e-18	4.23714900316292e-14	hervdb4
141231202-MALR1004uL	4.51617144422787	5.74049255832168	1.09366010577644	5.24888173940134	1.53025267143764e-07	3.441531315893e-05	hervdb4
180147701-HERV0741cL	4.04592561588723	5.75557086452174	1.19213164406384	4.82796584855485	1.37934740538974e-06	0.000238495832894045	hervdb4
161042701-MALR1023cL	4.73583376213924	5.75673902622776	1.03140341010729	5.58146208342373	2.38505053548452e-08	6.8008236386511e-06	hervdb4
070259402-MALR1127uL	6.06734084989557	5.76092567915423	1.15544517279906	4.98589272323362	6.16763609363194e-07	0.000117638799977721	hervdb4
012088401-MALR1023cL	3.6435287097273	5.76173608496077	1.12036242009837	5.14274308170286	2.70755774550467e-07	5.64401651180491e-05	hervdb4
070527101-HERV1034cL	5.49533827465713	5.76898934165012	1.25215122012252	4.60726248470664	4.08004831380431e-06	0.000620174492271735	hervdb4
030253702-MALR1014uL	5.10944152326283	5.77488108135993	1.12533934463356	5.13167970967937	2.87167861381223e-07	5.94279611217183e-05	hervdb4
161083602-HERV0899uL	3.41261730247077	5.77816977558053	1.22222904127498	4.72756707658737	2.27226011791263e-06	0.000367265815611571	hervdb4
042653901-MALR1001cL	12.3958828164217	5.79067564942447	0.948574375542878	6.10460897819468	1.03052657795559e-09	4.5672200904489e-07	hervdb4
070518401-HERV0588uL	7.12578400689836	5.81229481886954	0.942922861719213	6.16412546013796	7.08737355206965e-10	3.29245029456387e-07	hervdb4
160390201-MALR1014cL	4.27453087472746	5.83009800803198	1.06410826511581	5.47885793124393	4.28079896263812e-08	1.14270988924206e-05	hervdb4
021601501-HERV0739uL	9.00735404183759	5.83015429230514	0.97466466655974	5.9817027253935	2.20817005321483e-09	8.64045436018216e-07	hervdb4
170476102-MALR1026cL	3.15569153757372	5.87569441448457	1.39545545942874	4.210592588093	2.5470171014781e-05	0.00302910915001656	hervdb4
101434701-MALR1022uL	6.70877719502311	5.88146004774484	1.04482004817173	5.62916078997188	1.81088528089934e-08	5.34819923555481e-06	hervdb4
111508101-HERV0899uL	5.21179482767105	5.89784484784343	0.98749147273984	5.97255268592811	2.33569678569324e-09	9.03917732886854e-07	hervdb4
061523002-MALR1041uL	3.53614017108054	5.90240639772531	1.38617585923585	4.25805020221539	2.06217645565505e-05	0.0025295739612634	hervdb4
071052301-HERV1038cL	4.67900934883527	5.93138258464518	0.972123828538747	6.10146815715953	1.0509858001844e-09	4.63421972528579e-07	hervdb4
060497901-MALR1024uL	54.2039284745399	5.93258328851001	0.74862912972099	7.92459584189711	2.28889554854267e-15	7.42329470332035e-12	hervdb4
071937601-HERV0519uL	5.71952841912355	5.9485037948071	1.09489547082991	5.43294218789511	5.54323709964615e-08	1.43450476558712e-05	hervdb4
060559502-MALR1002cL	5.11664888886939	5.95817679036974	1.20550700684504	4.94246549919523	7.71407596143201e-07	0.000143998851002482	hervdb4
170010902-HERV0415uL	3.62952846815949	5.95943863685156	1.49904234124483	3.97549720437033	7.0232368996802e-05	0.0072795808510365	hervdb4
140688601-MALR0819uL	6.48461642448704	5.99981175402969	1.10738487353569	5.41800045983407	6.02692612414151e-08	1.54694075710029e-05	hervdb4
220108002-MALR1131uL	14.3003964977291	6.00810851522782	0.834025185522795	7.20374950243468	5.85789408691365e-13	7.90975255268785e-10	hervdb4
150883901PBLAsLU5p	9.70890391520846	6.00975402309384	1.0894945082815	5.51609391090299	3.46617089063173e-08	9.50103177304125e-06	hervdb4
030223502-MALR1022uL	13.3694836978843	6.01268745346749	0.996788791162552	6.03205765030213	1.61885001071837e-09	6.67189228883002e-07	hervdb4
0X0485601-HERV0746cL	6.06131450903058	6.0192966298243	1.03625725183612	5.80868951137266	6.29637318262151e-09	2.12545469049933e-06	hervdb4
023413702-MALR1127uL	4.86798297574822	6.03687866358965	1.09225781101588	5.52697229784508	3.25804381315908e-08	8.9944818141803e-06	hervdb4
041011501-MALR0819cL	4.37311708606152	6.03864822180029	1.26757980557317	4.76391955382228	1.89868225520032e-06	0.000313454194195821	hervdb4
041770201-HERV1036cL	4.95560092867543	6.04922804130578	1.08248095097447	5.58829976255946	2.29303576535113e-08	6.57705279359502e-06	hervdb4
012561202MR41sLU3	6.89706004003958	6.07104876758687	1.00229711697157	6.05713482039183	1.38567448487445e-09	5.87844449561284e-07	hervdb4
081467101-MALR1002uL	4.23743946384818	6.07777194940182	1.02879915338099	5.90763700517068	3.47049676434543e-09	1.27039218055185e-06	hervdb4
140164501-MALR1014uL	5.02321679207065	6.08640592869714	1.15546136313207	5.2675114226225	1.38285559175412e-07	3.15279793288249e-05	hervdb4
210609801-MALR1017cL	5.70386048548524	6.10695184004497	1.01090788746955	6.04105667365158	1.53108183822202e-09	6.36306610179407e-07	hervdb4
120910001-MALR1046cL	13.1810809708953	6.11707549949913	0.943088858973489	6.48621329930384	8.80205317360352e-11	5.49368433867607e-08	hervdb4
071527502ERVLsLR	3.39983388223143	6.15275869385131	1.37740964063834	4.46690549588422	7.93591652464723e-06	0.00111224626509817	hervdb4
120427401-HERV0954uL	4.35841799815802	6.2088175709005	1.40238624814828	4.42732348459539	9.54095928950372e-06	0.00129686787804292	hervdb4
023182902-HERV0794cL	9.46575717220101	6.2238114383838	0.895684264552512	6.94866671738756	3.68754549085983e-12	3.56449035163838e-09	hervdb4
091702001-MALR1023uL	11.682635241157	6.22425042105912	1.04702303927607	5.94471199541386	2.76943342495766e-09	1.04009608996624e-06	hervdb4
023470301-MALR1026cL	7.00421415900478	6.2249115197475	1.12744572826671	5.52125158992571	3.36593420424064e-08	9.26285874350188e-06	hervdb4
020146202-HERV0415cL	12.0096925763641	6.28857825532424	0.860321764550151	7.30956546079297	2.68007666628032e-13	4.09709341291893e-10	hervdb4
170087202-HERV0541cL	10.7261411241493	6.28952420127308	1.03867061597836	6.05535971126782	1.40104230307219e-09	5.92192082840576e-07	hervdb4
021417502-MALR1043cL	10.1566737272714	6.29779415205192	0.98060293669195	6.42236925508039	1.34169475650107e-10	7.89143922713564e-08	hervdb4
140796102-HERV0933uL	10.6996007408564	6.40596345857749	0.856484334479779	7.479370258965	7.46795965583921e-14	1.3639638735628e-10	hervdb4
071036302-MALR1017cL	4.57895157979699	6.43297569403694	1.38829741521947	4.63371581875341	3.59159952276237e-06	0.00055467595299911	hervdb4
010630002-MALR0820cL	4.66697340286103	6.46451801853585	1.25969263864479	5.13182170016532	2.86951262616204e-07	5.94279611217183e-05	hervdb4
160970701-MALR1022uL	4.70308661571675	6.48806298483281	1.60481327269125	4.04287719651796	5.27992774908189e-05	0.00568665588915704	hervdb4
042577303-HERV0886uL	6.75069143255218	6.50554230967064	1.04674976561703	6.21499285059385	5.13269868421363e-10	2.47381819082752e-07	hervdb4
120006502-HERV0863uL	8.19237871977828	6.51087974186924	1.12934899817463	5.76516183428928	8.15795216011698e-09	2.66821164807144e-06	hervdb4
120006501-HERV0863uL	6.06244154712609	6.52410273013967	1.1828521534065	5.51556905176263	3.47653206832518e-08	9.52191127348227e-06	hervdb4
090494302-MALR1026uL	8.31690793435732	6.53712715686008	1.17208289955266	5.57735904120352	2.44197516581883e-08	6.93464993488093e-06	hervdb4
030852901-MALR1002cL	6.7803173865754	6.55773688360112	1.51190955930524	4.33738701051308	1.44186613722406e-05	0.00185180009970205	hervdb4
220364301-MALR1133cL	15.563411218334	6.61211016884148	1.12348779200423	5.88534224928771	3.97231113196266e-09	1.42994959441253e-06	hervdb4
160169601-HERV0468uI	20.3018771881869	6.6251399500147	0.851474182169938	7.78078782509984	7.20742875380801e-15	1.93885420631508e-11	hervdb4
032018201-HERV0498uL	8.73425174219516	6.62906290151423	1.36870692008058	4.84330341598913	1.27698058437975e-06	0.000222906339231117	hervdb4
150070202-HERV0517cL	28.3413462368576	6.64626426456134	0.954756077599973	6.96121702756629	3.37345604922021e-12	3.30693988192202e-09	hervdb4
010333502-HERV0912cL	5.56704730365169	6.73059548633905	1.49097671386395	4.51421905101142	6.35505059084887e-06	0.000915454402671804	hervdb4
220110801-HERV0426uL	8.15719198310757	6.79161933264445	0.959519803525271	7.07814399212197	1.46097881978618e-12	1.67323059419868e-09	hervdb4
012038701-MALR0818uL	6.55686358861841	6.82973364897947	1.65193737517124	4.1343780651924	3.55917158325637e-05	0.00405053568438567	hervdb4
031061601-MALR1131uL	8.24616585699786	6.83907372543325	1.17350334623221	5.82791156701136	5.61253044961682e-09	1.92266566300694e-06	hervdb4
160951202-MALR1004cL	8.15038913028969	6.84149193560982	1.52181462116845	4.49561453835745	6.93693042182669e-06	0.00098860517247733	hervdb4
061259101-HERV0198cI	7.04049792558131	6.85872389643741	0.966151836962308	7.09901242645465	1.25651513171907e-12	1.49840508937853e-09	hervdb4
190198302-HERV0926uL	7.53900430901377	6.86739192819752	1.36060282255939	5.04731565621735	4.48060742439842e-07	8.83443402508374e-05	hervdb4
012036301-MALR1041cL	8.6730658684855	6.90748919860268	1.27114298490834	5.43407726794853	5.50807108508074e-08	1.42832186642835e-05	hervdb4
121745502-MALR1001cL	8.03282931375991	6.92213444095924	1.07397826914368	6.44532076657239	1.15356178871216e-10	6.91379986042996e-08	hervdb4
042577301-HERV0886uL	9.04183634951909	6.9618178765198	1.12361149094074	6.19592976099865	5.79419631962728e-10	2.76195330609486e-07	hervdb4
041011502-MALR0819cL	5.85647683263111	6.97881940988162	1.72571695071728	4.04401162483855	5.25443121751271e-05	0.00566271031397907	hervdb4
011943501-MALR0818uL	13.7363269052372	7.12631400335221	1.0232259628989	6.96455549579942	3.29442258538308e-12	3.25706702444341e-09	hervdb4
030528101ERVPsLU5	10.1256215823974	7.14873347661362	1.27171083074475	5.62135141400591	1.8946941811643e-08	5.56257846656207e-06	hervdb4
120134301-HERV0558uL	14.1142715730615	7.16469525649704	1.09754464129297	6.52793060704721	6.66845765000544e-11	4.30127913328046e-08	hervdb4
022906701MR525LU3	81.1328136301286	7.17912781406298	0.679155415380122	10.5706700579643	4.07572086224496e-26	1.01025475258303e-21	hervdb4
190226502MR413LRp	17.0404654183763	7.27567463147452	0.924707153500065	7.86808515964834	3.60110427654834e-15	1.08665670091114e-11	hervdb4
030084701-MALR1018cL	7.98563010062579	7.2853710567556	1.86412693950189	3.90819471698764	9.2988350536629e-05	0.00921702867844073	hervdb4
070526402-HERV0925uL	17.5928367948682	7.30715210422752	0.934919161929639	7.81581167846194	5.46099702429768e-15	1.5407115344486e-11	hervdb4
111646101-MALR1026uL	11.7489664433657	7.35732335796755	1.22681558972804	5.99708988014942	2.00884887138467e-09	7.94881112141288e-07	hervdb4
042614002-HERV0750cL	12.9936850057451	7.83572467684644	1.96281435983711	3.99208648417302	6.54944765783339e-05	0.00686850808770427	hervdb4
052704001-HERV0479cL	12.2742356973326	7.90329945408877	1.61540096638825	4.89246918785691	9.95787094323018e-07	0.000179045615270453	hervdb4
080740202-MALR0819uL	48.3240622033625	8.32336216119303	0.968730498192673	8.59203068007216	8.54455651474559e-18	5.4909851884204e-14	hervdb4
130879501-MALR1004uL	19.7491013622085	8.85578359761767	1.75447006230166	5.04755469352376	4.47500685769954e-07	8.82840750289308e-05	hervdb4

## Sheet: res_vargiu_3rd
ID	baseMean	log2FoldChange	lfcSE	stat	pvalue	padj	source
1058	16.3203485223463	3.89113031224235	0.514019071604259	7.57001155637686	3.73191028792847e-14	7.57337724044992e-11	vargiu
1278	13.4368767899724	3.51681363950256	0.496208700547957	7.08736794743621	1.36686622094601e-12	1.58221623492271e-09	vargiu
1350	15.3906742653834	-1.23124042735625	0.313491668268208	-3.92750606150994	8.5831258409039e-05	0.00864703940942196	vargiu
1405	19.584063825783	1.59865739995471	0.319455867874984	5.00431377450963	5.6061377743435e-07	0.000108020096082881	vargiu
1638	29.448037014418	1.48448942016284	0.286434645765184	5.18264617116117	2.18759800825792e-07	4.70638723388508e-05	vargiu
1874	6.36751345818604	4.57619850662559	0.86223734896448	5.30735360990968	1.11228270284602e-07	2.62574383361649e-05	vargiu
1892	48.6113938544019	1.53758503493542	0.264699213154945	5.80880092769817	6.29218514374881e-09	2.12545469049933e-06	vargiu
2371	10.6304181436056	3.58033420134518	0.548352478588063	6.52925689433205	6.60967991871073e-11	4.27130563387523e-08	vargiu
2476	46.3085336000869	1.91467840661343	0.269512951570655	7.10421668218599	1.21006879440624e-12	1.45804886470436e-09	vargiu
3200	14.4113525783611	4.24214708968895	0.574637938477428	7.38229553887275	1.55583352770554e-13	2.60823840958636e-10	vargiu
3503	80.5989340297771	2.39954619166675	0.374304534764503	6.41067892264903	1.44873017967564e-10	8.44938398237041e-08	vargiu
4426	36.8550382044513	1.15903744363087	0.212216493588108	5.46158040797926	4.71914412880604e-08	1.24819923443466e-05	vargiu
4699	3.67418493910193	2.09271792911934	0.512616756706157	4.08242200775136	4.45687712930106e-05	0.00491179542772551	vargiu
4713	592.22015869179	1.59035642385187	0.235162992520162	6.76278357750326	1.35365373303681e-11	1.08737249638527e-08	vargiu
565	130.531351610853	2.40590716275504	0.32399392799696	7.42577855587966	1.12118442240879e-13	1.9650172639611e-10	vargiu
6072	52.0995300724513	1.24940623290676	0.232294451909912	5.3785453015955	7.50900889589365e-08	1.87871396326822e-05	vargiu
6262	93.1004172121393	2.31471782840251	0.3411434487543	6.78517449728203	1.15946284127537e-11	9.5799236947471e-09	vargiu

## Sheet: res_hervdb4_4th
ID	baseMean	log2FoldChange	lfcSE	stat	pvalue	padj	source
011943002-MALR1003uL	27.7127140121329	-1.00117301848402	0.2210674205239	-4.52881304767286	5.93159513993096e-06	0.00062018142375982	hervdb4
170222802-HERV0421uL	13.9842689229308	-1.01198886294325	0.224311420003186	-4.51153518144048	6.43601055052723e-06	0.00066612031029726	hervdb4
021405702-MALR1003cL	13.8130020976976	-1.01502148654266	0.263598706324483	-3.85063151749007	0.000117813643486953	0.00812312548437164	hervdb4
012781101-HERV0740uL	20.2662406998996	-1.02458612191033	0.218948588003785	-4.6795740098247	2.87471576830984e-06	0.000327398708867372	hervdb4
080657801-MALR1002uL	15.6459562161212	-1.02533738295294	0.235438967284031	-4.35500289005254	1.33065162528838e-05	0.00125479001904232	hervdb4
170083301-MALR1018cL	7.94104276791563	-1.02540583900002	0.267010719421914	-3.84031712741741	0.000122875476510122	0.00840864678732847	hervdb4
050010201-HERV0507uL	8.41025033702143	-1.0273879715774	0.267252240046516	-3.84426327501908	0.000120915140928931	0.00830068688529333	hervdb4
010402202-MALR1017uL	8.99386602176478	-1.02844192133712	0.259277743313343	-3.9665646121203	7.29160152945282e-05	0.00538982356756134	hervdb4
190360401ERV9pol	11.2271958609861	-1.02949103931396	0.253800188302365	-4.05630526202557	4.98550925668578e-05	0.0038925875043686	hervdb4
111054602-MALR1022cL	15.6887755856127	-1.03229065625542	0.210270442757154	-4.90934742286929	9.1379964079128e-07	0.000121264532064011	hervdb4
220252601-MALR1006cL	30.9236290950948	-1.0449824715905	0.229323526355536	-4.55680447705304	5.19377297415583e-06	0.000552357676215616	hervdb4
030854501-MALR1041uL	14.4749836987402	-1.04541836126724	0.222173273255383	-4.70541909001611	2.53344969101359e-06	0.000293082360331747	hervdb4
190397901-HERV0489uL	15.2286157951773	-1.04608440074758	0.27104183321664	-3.85949426453097	0.000113621923650749	0.00787321883891432	hervdb4
190397501-MALR1022uL	26.8400486214861	-1.049534618216	0.208581428188407	-5.03177405261595	4.85961802777056e-07	7.00547442220002e-05	hervdb4
121997502-HERV0911uL	9.6461961887859	-1.05090876987403	0.240935011276308	-4.36179351563328	1.29000587401646e-05	0.00122044121701525	hervdb4
110900101-MALR1044uL	50.9060483474974	-1.05191006119567	0.179640365250772	-5.85564419069866	4.75164551391271e-09	1.23145334297087e-06	hervdb4
190397401-MALR1022uL	22.8923920806394	-1.05565145907952	0.240693569595523	-4.38587312844922	1.15521443882567e-05	0.0011101703532575	hervdb4
021376002-MALR1041uL	11.0153961215011	-1.06136330635459	0.263842626420523	-4.02271354236348	5.75314524401417e-05	0.00439845001669486	hervdb4
040032102-HERV0116cI	5.24525367313163	-1.06783673066527	0.279003135972536	-3.82732877515175	0.000129541436477586	0.00878443590051032	hervdb4
012899701-HERV0402cL	14.0681286641743	-1.06931647573349	0.230980959404845	-4.62945724395958	3.66625413519585e-06	0.000406733858694266	hervdb4
070517501-HERV0489cL	21.1314039035386	-1.07246231362102	0.265983772486859	-4.03205918764839	5.52902571458676e-05	0.00425334183878497	hervdb4
020687701-MALR1024cL	14.6556682674981	-1.0733257794868	0.253793277271578	-4.22913400632853	2.34592585274783e-05	0.00203765698552347	hervdb4
190094001-MALR1127cL	5.82007285587385	-1.08508272242155	0.246146178429663	-4.40828587851352	1.04191958627254e-05	0.00101506719491381	hervdb4
010229001-MALR1024cL	12.2321795640496	-1.08727970710915	0.227181587178617	-4.78594995576953	1.70180460819222e-06	0.000207678207004795	hervdb4
170642801-MALR1008uL	3.88670035015879	-1.0949211204361	0.28095353035205	-3.8971609257378	9.73269496927847e-05	0.00693092511438336	hervdb4
020050202-MALR1026uL	4.90470899127218	-1.10014674897224	0.27534000549623	-3.99559354620303	6.45323687882716e-05	0.00485139138147877	hervdb4
023472002-HERV0811uL	33.3933287267369	-1.10353241678584	0.281478428608753	-3.92048663281305	8.83703380039132e-05	0.00637022739803032	hervdb4
220418302-HERV0933uL	8.06055789824122	-1.10651155816687	0.263850920510496	-4.1936998211945	2.74441102480768e-05	0.00232852203870113	hervdb4
180645502-HERV0515uL	10.3950624006822	-1.10879002704856	0.283716130882683	-3.9080965315541	9.3026139636261e-05	0.00666431275321538	hervdb4
070077302-HERV0949cL	13.7250590682252	-1.11123550625559	0.242136009100731	-4.5893029722535	4.4472854553605e-06	0.000482732874169284	hervdb4
0X1150501-MALR1041uL	12.904488805542	-1.11404726381959	0.276740601628688	-4.02560107647069	5.68299626492759e-05	0.00435729863865482	hervdb4
071387302-MALR1002uL	5.80770751415815	-1.11872507518425	0.2541435158735	-4.40194223070834	1.07286126255363e-05	0.00104053749393896	hervdb4
070079001-MALR1042uL	8.62737452972392	-1.11991061471503	0.25414978423285	-4.4064983887178	1.05055089500178e-05	0.00102232801902277	hervdb4
040037202-MALR1044uL	6.95520638308269	-1.1238352623727	0.277477728824376	-4.05018185471747	5.117784540799e-05	0.00398557807753157	hervdb4
190159801-MALR1014uL	4.46926616048269	-1.15307871314328	0.303213893357649	-3.80285580048666	0.000143037620917418	0.00957254983738278	hervdb4
110850901-MALR1018uL	22.8690187375623	-1.15971944179619	0.238362590959633	-4.86535843198896	1.1424956499042e-06	0.00014760567402448	hervdb4
101036401-MALR1013cL	38.6933681457915	-1.16298737399319	0.282946698328303	-4.1102701705456	3.95196455132155e-05	0.00317971420959797	hervdb4
082290102-MALR1007cL	19.9281927336228	-1.16654095818694	0.169951552045853	-6.86396178289804	6.69765558700577e-12	3.86725531081987e-09	hervdb4
190070702-HERV0741uL	8.84259821631292	-1.16827276402862	0.239951778138609	-4.86878144055162	1.12288514747979e-06	0.000145533018154044	hervdb4
012757302-MALR1017uL	8.01752884534991	-1.17944597164288	0.285150807037261	-4.13621824850302	3.53076399922059e-05	0.00288735157809057	hervdb4
033002802-MALR1022uL	7.48969947751598	-1.18654198997661	0.283192253071864	-4.18988152785206	2.79100136385656e-05	0.00236400608563706	hervdb4
070079102-MALR1044uL	6.27611693070515	-1.19538652475487	0.258578438340378	-4.62291648301058	3.78382092970452e-06	0.00041737493293899	hervdb4
160940201-HERV0415uL	20.5755786613218	-1.20804449249167	0.304039323225469	-3.97331660811459	7.08787346432141e-05	0.0052668819049011	hervdb4
032202301-MALR1044uL	10.7758462303502	-1.21194969159681	0.316437495330719	-3.82998130588212	0.000128152994279631	0.00871480542326429	hervdb4
220418301-HERV0933uL	4.64256493533899	-1.2231649109939	0.31018223604596	-3.94337511582276	8.03428375990217e-05	0.00586870868903797	hervdb4
020050102HK08sLR	5.75728953638371	-1.23993236990173	0.284202030260355	-4.3628554263523	1.28375783651338e-05	0.00121519270165541	hervdb4
013068301-HERV0871uL	5.53974228075856	-1.24065322974322	0.314246673820608	-3.94802342586276	7.87990955122312e-05	0.00577749041298426	hervdb4
012781201-MALR1126uL	7.5222482132902	-1.24128002813335	0.26308641446939	-4.71814567330225	2.38004052371759e-06	0.000277807488240995	hervdb4
190270001-HERV0572cL	9.00342487219339	-1.24370547820165	0.301509865379936	-4.12492465755455	3.70856138071854e-05	0.00300547634361734	hervdb4
050851606-HERV0539cI	5.24679359556102	-1.2477347124987	0.307386845792305	-4.05916755898452	4.92479664556077e-05	0.00385084031532785	hervdb4
020050302-MALR1129uL	4.8110354935463	-1.25536862269962	0.306101859449021	-4.10114667372248	4.11107863263756e-05	0.0032917085996721	hervdb4
030192801-MALR1042uL	4.16782653205315	-1.25567141876077	0.324172759323135	-3.87346370923509	0.000107299390812535	0.00752222921207393	hervdb4
220024402-HERV0912uL	3.70319896177599	-1.25918422551311	0.31437877049721	-4.00530933918224	6.19363740590499e-05	0.00467954725146342	hervdb4
071391202-MALR1126uL	4.64258851552222	-1.26846323117035	0.33137843410085	-3.82783881097197	0.000129273367001294	0.00877380086383514	hervdb4
062291202-MALR1045uL	26.7325822783756	-1.26932255580648	0.331531624851906	-3.82866206617087	0.000128841775372223	0.00875306830259768	hervdb4
160015401-HERV0857cL	11.3374231076086	-1.27234342356904	0.268351743158946	-4.74132721700051	2.12322688962739e-06	0.000252156808774297	hervdb4
023331901-HERV0118cI	9.26982615380053	-1.27369476061595	0.324721067997504	-3.92242723415081	8.76613723277206e-05	0.00633095721647567	hervdb4
021405701-MALR1003cL	19.2740902220193	-1.28668651675206	0.289001237508855	-4.45218341569432	8.50015094919706e-06	0.000851536484523777	hervdb4
120076102-HERV0739uL	37.9407784339827	-1.28891103736111	0.337154575818754	-3.82290833286508	0.000131886819688341	0.00891795951432054	hervdb4
050786501-MALR1041uL	9.88044648465514	-1.29141755448713	0.327693298248907	-3.94093367605646	8.11650675563187e-05	0.005924674325493	hervdb4
220273802-MALR1013uL	6.65728493074976	-1.29228138718567	0.273779567214749	-4.72015278690256	2.35667560451919e-06	0.000275734057607995	hervdb4
160015402-HERV0857cL	8.6420165470362	-1.29422013485885	0.301434459148831	-4.29353743600973	1.75848647763673e-05	0.00159913516108359	hervdb4
121997602-MALR1022uL	9.63201754290005	-1.29484489295992	0.231258914765324	-5.5991134191471	2.15450809553636e-08	4.61516913156189e-06	hervdb4
200731401-MALR1018uL	5.81677789766226	-1.30101713172273	0.335197792127418	-3.88134159078285	0.000103881807764118	0.00732406845394235	hervdb4
091759702-HERV0926uL	7.98430889466419	-1.31080009437646	0.260852142042809	-5.02506931363952	5.03250742363951e-07	7.21049019880835e-05	hervdb4
190015001-HERV0490uL	4.50208918034903	-1.31243916738982	0.343460262994474	-3.82122565197865	0.000132790080239005	0.00897037446847177	hervdb4
082243601-MALR1003uL	28.0781666461334	-1.31371616660727	0.283962181671062	-4.62637721289613	3.7211730610177e-06	0.000411773429730345	hervdb4
190672402-MALR1014uL	3.97364089940562	-1.31749248406345	0.344796491690629	-3.82107276557088	0.000132872437655606	0.00897244470037917	hervdb4
031675001-HERV0817uI	9.61140342652208	-1.31801407925874	0.34375741513105	-3.83414006867685	0.000126004328982268	0.00858719996925108	hervdb4
022907702-MALR1023uL	10.3461266088945	-1.31813429189436	0.326380608034823	-4.03864157197023	5.37616419672548e-05	0.00415139407999038	hervdb4
220020202-MALR1003uL	2.87825897864596	-1.32206227411226	0.33325825825598	-3.96708030891996	7.27584810487422e-05	0.00538350705619073	hervdb4
110003302-HERV0764uL	41.6890212997408	-1.32436332725162	0.270570955626096	-4.89469878312353	9.84564131617096e-07	0.000129565204760624	hervdb4
050786502-MALR1041uL	10.3322669687096	-1.3246399996888	0.316534098089465	-4.1848256086281	2.85385108198454e-05	0.0024110338402371	hervdb4
020562102-MALR1127uL	7.27393472365033	-1.3426351047838	0.348897557382004	-3.84822156640598	0.000118978422487061	0.00818899273848366	hervdb4
012435402-MALR1018uL	10.5952756601167	-1.34443270450466	0.320275447818155	-4.19773889526494	2.6959320396808e-05	0.00229243405148255	hervdb4
220264801-MALR1018uL	3.43078178082295	-1.35638632987686	0.315941750640507	-4.29315317499845	1.76153389365075e-05	0.00160148674816527	hervdb4
022907802-MALR1026uL	6.40861407644665	-1.36334410158811	0.35313924540959	-3.86064171374333	0.00011308962807419	0.00784887254686107	hervdb4
020635401-MALR1018uL	3.99141039966245	-1.3637766994894	0.347034871628046	-3.92979729412063	8.50175026337976e-05	0.00616954700208708	hervdb4
121213502-MALR0818uL	6.80285506217041	-1.37215175876874	0.351494928529476	-3.90375976264954	9.47097951520989e-05	0.00676537528070839	hervdb4
141130102-HERV0416uL	5.94182651629381	-1.37842618092558	0.324764471853395	-4.24438724180344	2.19191550808251e-05	0.00192128951658194	hervdb4
081482801-HERV0406uL	55.5895506690704	-1.4016962365056	0.369490543948108	-3.79359163438418	0.000148483798959505	0.00986664811135682	hervdb4
011840301-MALR1004uL	9.42238001324617	-1.40181071235226	0.329563675644004	-4.253535252673	2.10421793726231e-05	0.00185378448486613	hervdb4
070517601-MALR1003uL	7.13393514464135	-1.44435805301028	0.292419620054463	-4.93933359444648	7.83900065027829e-07	0.000105642330316877	hervdb4
170463802-HERV0590cL	3.94490692738943	-1.45344356788952	0.373048193708695	-3.89612814751887	9.77426867491046e-05	0.00695692892485307	hervdb4
100007803-HERV0463cI	33.0053586516791	-1.45470088595121	0.344415325496528	-4.22368221813021	2.40342878223557e-05	0.00207937635505207	hervdb4
100168802-HERV0759uL	14.1053208049372	-1.46904813723289	0.352059501734523	-4.17272685439591	3.00975682445981e-05	0.00252281597397112	hervdb4
023219502-HERV0490uL	6.90397837018336	-1.47259673369013	0.34734702411515	-4.23955477218064	2.23963544533123e-05	0.00195817156018857	hervdb4
040177501-MALR1003uL	16.6336385947815	-1.49976917101971	0.355889557523538	-4.2141421104229	2.50729385383597e-05	0.00215419933933687	hervdb4
181112001-MALR1127cL	8.79627309203979	-1.502699794197	0.328910045249744	-4.56872575313409	4.90698346718168e-06	0.000526211805556671	hervdb4
121286401-HERV0394uL	11.0706523205155	-1.50412719404647	0.346125300358441	-4.34561470221571	1.38886172737693e-05	0.0013030532120831	hervdb4
181112002-MALR1127cL	11.5664902118659	-1.51741900115997	0.346647765982397	-4.37740885725777	1.20098556492895e-05	0.00114559924897463	hervdb4
010290902-HERV0541cL	5.97885540735256	-1.5475278412819	0.379918567271772	-4.07331458526714	4.6348752412021e-05	0.00365544183227716	hervdb4
070629302-HERV1038uL	4.36998593877373	-1.54952553713776	0.363521759062669	-4.26253861978764	2.02117553670321e-05	0.0017956690597715	hervdb4
012757202-MALR1023uL	5.82235433657004	-1.58225664280018	0.307420134538156	-5.14688683347706	2.6484499009503e-07	4.13138232654939e-05	hervdb4
160163602-MALR1005cL	7.43919218701481	-1.58495749373229	0.412891636265539	-3.83867667571976	0.000123699191139943	0.00845834350923802	hervdb4
200797509ERVI5LR	4.81052107335764	-1.59345587609757	0.346370507963202	-4.60043750684125	4.21604494397443e-06	0.000459501230043344	hervdb4
010511002-HERV0402uL	83.335684649321	-1.6215838286969	0.394554976511929	-4.10990590723893	3.95820370193567e-05	0.00318325805016389	hervdb4
050290201-HERV0590uL	3.36451694276373	-1.6225615566562	0.425221313974831	-3.81580486050669	0.000135739749373621	0.00914293630194758	hervdb4
071588402-MALR1025uL	3.28428239795894	-1.68714897566237	0.435716535223303	-3.87212519900746	0.000107890504896025	0.00755892571126091	hervdb4
031889802-MALR1013cL	3.44122140421196	-1.69382267091995	0.426469986100892	-3.97172773260353	7.13532438890994e-05	0.00529712665841819	hervdb4
010511001-HERV0402uL	57.1751298008044	-1.71281175286184	0.419853510279577	-4.0795461057865	4.51237199037807e-05	0.00357168526406838	hervdb4
022125301-HERV0394uL	3.31748477096393	-1.7693243558716	0.423412819350686	-4.17872174627329	2.93152083524233e-05	0.00246617299453526	hervdb4
031987602-MALR1022uL	1.8095527015426	-1.7695412462523	0.44693308811407	-3.95929792023064	7.51704185845967e-05	0.00553482678914211	hervdb4
031674801MR52env	3.81001689875629	-1.8163433759482	0.449476768589669	-4.04101725134177	5.32198427861905e-05	0.00411596831817781	hervdb4
060169703-MALR1046cI	2.94481746723797	-1.84086410277683	0.412060570117073	-4.46745997136733	7.91538162269445e-06	0.000801282301839973	hervdb4
030486702-MALR1014uL	2.68263636354514	-1.86539808831085	0.469279509054861	-3.97502565596313	7.03716695855972e-05	0.00524054538027123	hervdb4
010333201-HERV0856uL	7.74253045950905	-1.89509020956003	0.348235581703366	-5.44197752650764	5.26923244071782e-08	1.01212134301178e-05	hervdb4
042438502-HERV0901cI	4.49109784120714	-1.93235107696265	0.424642505840324	-4.550536157794	5.35093905624763e-06	0.000566814063278099	hervdb4
010333101MR52env	8.07682233365629	-1.94928700698474	0.426428640287868	-4.57119157303515	4.84958672639183e-06	0.000520700366891242	hervdb4
040547301ERVLpol	1.48737607182443	-2.00283252869141	0.524653354176982	-3.81743967277829	0.000134843744428445	0.00908611188185614	hervdb4
012757201-MALR1023uL	3.86276857950444	-2.02348503243492	0.40685685440728	-4.97345690631853	6.57693993733168e-07	9.07126270688728e-05	hervdb4
110699801-MALR1014uL	3.78411981070403	-2.0418612050407	0.428535648737371	-4.76474060222714	1.89096756711183e-06	0.000227583508434179	hervdb4
081964802-MALR1002uL	2.37930265074207	-2.04957385838386	0.506669395146713	-4.04518977861368	5.22807547460846e-05	0.00405690239534577	hervdb4
020409402-HERV0436uL	1.28798163048862	-2.05047215959181	0.529572521244542	-3.87193836034586	0.000107973260717963	0.00756143978755011	hervdb4
120909302-MALR1015uL	3.0006359774028	-2.15048655302242	0.534899628364713	-4.02035529468744	5.81104348023318e-05	0.00443578291639405	hervdb4
210623601-MALR1013uL	1.81730284590555	-2.17195427687213	0.451594518419737	-4.80952311926292	1.51290797872456e-06	0.000187905986677523	hervdb4
121260202-MALR1004uL	4.06293427812856	-2.20431876801127	0.569723396154516	-3.8691034682617	0.000109236281635278	0.00763180480231009	hervdb4
101133001-MALR1127uL	2.09118056867337	-2.21800543234548	0.559857085810939	-3.96173503659913	7.44070866495544e-05	0.00548764411814792	hervdb4
100485001-HERV0760cL	1.99216019600978	-2.32778837070666	0.508310090733563	-4.5794651987871	4.66166341246319e-06	0.000502856834750692	hervdb4
050331401-MALR1001uL	1.38207904474606	-2.36407850523365	0.529612746245811	-4.46378702550411	8.05236057281874e-06	0.000813487675685461	hervdb4
150900102-HERV0796uL	1.66916072283149	-2.4111005062166	0.559450810532148	-4.30976318351058	1.63429460143301e-05	0.00150035162060657	hervdb4
131406902-MALR1131uL	1.13197425825213	-2.41141197949992	0.566059561712258	-4.25999690245618	2.04429736761493e-05	0.00181202105286696	hervdb4
110188702-HERV0585uL	1.33069795790715	-2.44249893055207	0.584802580676194	-4.17662132702606	2.95870961472116e-05	0.00248580753954422	hervdb4
060116401-MALR1127uL	1.23981364890253	-2.612282421877	0.65751415057687	-3.9729676077467	7.0982705212639e-05	0.00527347856195461	hervdb4
052248602-HERV0537uL	2.65755797179445	-2.71856390198408	0.586408546048107	-4.63595546194694	3.55292467948953e-06	0.000395547930659623	hervdb4
070314803-HERV0700cI	5.54154219321511	-3.11084411424253	0.472563102779959	-6.58291791285076	4.61303864262647e-11	2.10356986828415e-08	hervdb4
042634702-MALR1126cL	14.0118584140631	1.0070185923056	0.258741997407534	3.89197966466761	9.94295805673136e-05	0.00706471192638599	hervdb4
110077401-MALR1011cL	43.4849182277723	1.00922477378591	0.182102757903369	5.54206199513706	2.98930426611975e-08	6.13452611726125e-06	hervdb4
190550102-MALR1001cL	16.5857472923056	1.0116220933323	0.262451658402068	3.8545082911327	0.000115962453935569	0.0080177905488586	hervdb4
041002401XA34sLU3	43.0769987470423	1.04746663081533	0.229298708359698	4.56813140513721	4.92091506352347e-06	0.000527379847234069	hervdb4
070096901-MALR1003uL	6.43750688537744	1.0529465929185	0.234159312027636	4.49671031145764	6.90129136876148e-06	0.000710648703497807	hervdb4
190391902-HERV0922uL	32.306663814191	1.05740312851124	0.193392412026261	5.46765572357436	4.5602652071855e-08	8.89546504888989e-06	hervdb4
120667001-MALR1042uL	39.5998439117729	1.05915819968283	0.220423659223952	4.80510215378795	1.54672512378049e-06	0.000191080296352547	hervdb4
190230005HK03pol	8.66922234321152	1.06670198977593	0.275151293663929	3.87678347999629	0.000105846471779958	0.00744292657286344	hervdb4
220277901-HERV0899uL	71.219955904574	1.06741457398775	0.233044199194474	4.58030956220884	4.64288208216609e-06	0.000501298363457771	hervdb4
170035101-HERV0761cL	39.869371269991	1.07053126717379	0.214909711394791	4.9813070811268	6.31562263476893e-07	8.77706124867409e-05	hervdb4
121586102-MALR1019uL	25.2156325764627	1.07486876296225	0.232371745003445	4.62564311743803	3.73437836323874e-06	0.000412971312814247	hervdb4
020009602-MALR0818uL	13.4500310681851	1.08299565044228	0.262144386743211	4.13129445149306	3.60726161437405e-05	0.00293847869816921	hervdb4
012777202-MALR1133uL	26.7113325099258	1.08586367756012	0.263947595670999	4.11393661230241	3.88968285922778e-05	0.00313469053834005	hervdb4
141119501-MALR1041cL	13.7657828401105	1.09507192633225	0.231460495081603	4.73113965277821	2.232628552709e-06	0.000263078696217684	hervdb4
190127702-MALR1004cL	56.3618333925666	1.10059512245749	0.265322281089331	4.1481443546271	3.35181037544859e-05	0.00276505466890524	hervdb4
041969301-MALR1004uL	5.19212049507139	1.10177516052775	0.288855965773432	3.81427178620899	0.000136585087665478	0.00918393466971264	hervdb4
170313001-HERV0933uL	25.2619349403036	1.10554306793656	0.219726377039887	5.03145358709424	4.86774960577587e-07	7.00915546969436e-05	hervdb4
190200404HRLQ5LU3p	20.3361767445706	1.12731366257225	0.260846498106405	4.32175118606497	1.54795693379871e-05	0.00143207681995955	hervdb4
101415102-MALR1133uL	17.4797086588622	1.1281836242241	0.228747059882197	4.93201366087547	8.13862233433288e-07	0.000109298170373847	hervdb4
120667002-MALR1042uL	42.7936835561604	1.13870800413131	0.207108580276659	5.49812085337174	3.83859827367606e-08	7.67321643393471e-06	hervdb4
140467901-MALR1017cL	6.64034897691505	1.14748820250725	0.277147178530623	4.14035679017551	3.46766043226609e-05	0.00284748585708703	hervdb4
190718101-MALR1004uL	15.8406014140295	1.1518180898284	0.248920535140614	4.62725218382545	3.70549208728976e-06	0.000410299892830661	hervdb4
110021601-HERV0406uL	10.1570621289799	1.15222185734382	0.28425407445694	4.05349284630346	5.04585436165097e-05	0.00393751378587839	hervdb4
021281101-MALR1043uL	26.8874594104267	1.1561477948813	0.227489074523597	5.0822123976832	3.73063915518784e-07	5.55863632302827e-05	hervdb4
220266501-MALR1023cL	8.47340916982457	1.17960570618058	0.282040053936016	4.18240490922679	2.88441671676329e-05	0.00243362579394893	hervdb4
011943902-MALR1022uL	39.1170728064972	1.18207312412513	0.261567413150437	4.51919109451635	6.20763470388147e-06	0.000645348530539529	hervdb4
190391901-HERV0922uL	12.5135438382706	1.18308659512596	0.291103339329738	4.0641464225385	4.82085568754856e-05	0.00378149489306759	hervdb4
200741102-MALR1042uL	6.86154505653671	1.18451741843398	0.308047720193574	3.84524000920911	0.000120434499545754	0.00827423877100922	hervdb4
071799202-MALR1042uL	3.53705209663978	1.18840515339606	0.294043342174769	4.04159857729313	5.30880552659568e-05	0.00410760689819227	hervdb4
020646504-MALR1011cI	10.7000501502675	1.20847241304204	0.312618232288311	3.8656491791801	0.000110794102123531	0.0077219862058461	hervdb4
052844302-HERV1033cL	14.7881211154787	1.20855192963212	0.303256229648245	3.9852501333079	6.7409078277623e-05	0.00504688205909401	hervdb4
023613302-MALR1023uL	11.3450891107128	1.21293631818227	0.297858393893031	4.07219115878893	4.65729315414542e-05	0.00367228782174857	hervdb4
023429202-MALR1018uL	13.916586731646	1.21884112725821	0.271262362838662	4.49321872191734	7.01546644715756e-06	0.000720908251848569	hervdb4
140808601ERVRsLR	16.3932454389242	1.22916112151724	0.224860485249033	5.46632779946173	4.59454338577191e-08	8.95226527642094e-06	hervdb4
031727901-HERV0770uL	10.8052326806179	1.22969490752286	0.293258829359422	4.19320676621718	2.75038536952928e-05	0.00233245046660325	hervdb4
190089001-MALR1132cL	9.59951854634038	1.23392202496816	0.282715318806255	4.36453896512684	1.27391141957515e-05	0.00120718935232378	hervdb4
190175102-MALR1044cL	39.2942717123147	1.26323212545945	0.300677617482668	4.2012842061058	2.65405155189763e-05	0.00226459053243057	hervdb4
121267701-MALR1127cL	15.7955814148288	1.26744180611655	0.294133934410359	4.30906351780646	1.63947281504247e-05	0.00150422383396004	hervdb4
071389402-MALR1019uL	20.9522406875506	1.27284121442253	0.241391161685472	5.27294042389594	1.34255155108073e-07	2.31132058409578e-05	hervdb4
012698101-MALR1020uL	10.300642609053	1.28798647082301	0.295930158644366	4.35233257983297	1.34696724194627e-05	0.0012681079009772	hervdb4
110899801-HERV0794uL	18.3968093459386	1.30505933519133	0.296703293067072	4.39853336880999	1.08984871766629e-05	0.00105583278058224	hervdb4
100102203-MALR1132cI	16.5253235419694	1.30656627729387	0.285171814141492	4.5816809814367	4.61253173161723e-06	0.000498176396360352	hervdb4
010310901-HERV0615uL	6.0059810700785	1.31795521989963	0.309910463473271	4.25269674708258	2.11211509352697e-05	0.00185932567162792	hervdb4
072097702-HERV0918uL	24.630913706927	1.3210611124211	0.245231553228951	5.38699484233068	7.16454893082843e-08	1.32317284192447e-05	hervdb4
082001202-MALR1127uL	24.5470615070798	1.32577809403141	0.236605829067987	5.60331966145457	2.10284890584552e-08	4.51007804268549e-06	hervdb4
020054601-HERV0479uL	4.36091420774523	1.32589829384524	0.310878215738488	4.26500869704099	1.99894415232015e-05	0.00177910643687647	hervdb4
090300102-MALR1130cL	19.7335214455456	1.32627921592395	0.283954258745887	4.67074951360688	3.00102708722805e-06	0.000340109869304337	hervdb4
120666907ERVH5LU3I	40.601914289991	1.3273658375373	0.241946511728379	5.48619539110143	4.10682633154407e-08	8.1437192775567e-06	hervdb4
011740602-MALR1010uL	6.50193556695401	1.32882964181462	0.321727799270938	4.13029164662134	3.62303320285196e-05	0.00295063361195421	hervdb4
220420702-MALR1025cL	9.22399862673979	1.33338920010752	0.297364035884485	4.48402980589587	7.32464243521603e-06	0.000748688488326559	hervdb4
220278101-HERV0794uL	31.3889477955953	1.33482302556833	0.274299619902209	4.8662955714055	1.13709423676164e-06	0.000147072099158041	hervdb4
091117802-HERV0706cL	7.56281704910966	1.3358689523241	0.31129413168173	4.29133997839028	1.77598162686078e-05	0.00161188660400126	hervdb4
021013001-HERV0468cI	8.21090180140478	1.34767256776394	0.285523758578348	4.72000149645737	2.35842908262104e-06	0.000275841611139587	hervdb4
030577602-HERV0414cL	23.1039285002773	1.34896662600772	0.234032737818958	5.76400822628175	8.21394088979128e-09	1.98820767608309e-06	hervdb4
210428201-HERV0862cI	3.68399449262935	1.36033318811357	0.342213858212111	3.9750967281705	7.03506573575849e-05	0.00524054538027123	hervdb4
060039001-HERV0577uL	8.03858456959696	1.36862798262271	0.303125337718829	4.51505635563931	6.32999302898638e-06	0.000656691832860644	hervdb4
050859701-HERV0906cI	5.95714307221881	1.37071860324844	0.333175423651765	4.11410478067289	3.88684865446936e-05	0.00313351960960644	hervdb4
150375901-HERV0489uL	6.19483771916888	1.37896012783952	0.342677603185604	4.02407427570525	5.719986389458e-05	0.00438082029765993	hervdb4
071943902-HERV0378uL	10.4956722700099	1.37936972554061	0.313296262542743	4.40276470056013	1.0688006527477e-05	0.00103746909794827	hervdb4
011864301-MALR1001uL	20.0174385991181	1.38756651752024	0.306066459238608	4.53354647540292	5.80014967607279e-06	0.000607536353936244	hervdb4
012290702HK08sLR	5.51628313996913	1.39196227417346	0.309939949356431	4.49107085764121	7.0865968231218e-06	0.000727356057249253	hervdb4
110222801-MALR1018uL	4.05364325436525	1.39644275809417	0.35205504459161	3.96654665100472	7.29215078373019e-05	0.00538982356756134	hervdb4
022962601ERVHsLU3I	11.5235544821014	1.39708508364339	0.271444547148534	5.14685263829931	2.64893253316016e-07	4.13138232654939e-05	hervdb4
012777201-MALR1133uL	9.72645893377383	1.40570235297388	0.319251470294545	4.40311943333247	1.06705383752128e-05	0.00103622771802767	hervdb4
051877201-HERV0374uL	12.6533478075317	1.41769257707396	0.356792096566153	3.97344165052464	7.08415183727616e-05	0.00526574422900861	hervdb4
052448802-HERV0417uL	37.1311020540632	1.41974740193438	0.198190555330111	7.16354722135784	7.86157648115284e-13	6.00908429623273e-10	hervdb4
150375802-HERV0391uL	2.38116237149672	1.42190533944649	0.36438259479353	3.90223177441334	9.53098281182316e-05	0.00680403549754963	hervdb4
190006501-HERV0166uL	5.22824076920875	1.42311856540184	0.370460762922646	3.84148257476594	0.000122293419060216	0.00837376919539784	hervdb4
121603001-HERV0740uL	49.7850267593134	1.42789878323422	0.261247634171248	5.46569077176115	4.61107573442505e-08	8.97943603456892e-06	hervdb4
022961702ERVLsLR	6.69216772014624	1.43039166514129	0.287793734933166	4.97019737234193	6.68847806448202e-07	9.1958623531559e-05	hervdb4
050849301-HERV0469uL	9.56102106497944	1.43437177618082	0.319823168931612	4.48489013779841	7.29515122842184e-06	0.000745893747580126	hervdb4
160942102-MALR1023uL	10.2743040133855	1.4481687683198	0.311195172284467	4.65357080474248	3.26235506650341e-06	0.00036649480582001	hervdb4
020121302-MALR1014uL	12.0230141704662	1.46277013058923	0.337150095598477	4.33863181320671	1.4337248404808e-05	0.00133997089723579	hervdb4
091680202MR41sLU3	13.8900584533871	1.46794775600595	0.300351872396641	4.8874266848831	1.02162520730619e-06	0.000133985026243158	hervdb4
220158201-MALR1022uL	29.3494890446904	1.46864329975567	0.239362442989379	6.13564635042114	8.48136444269063e-10	2.6683618213078e-07	hervdb4
170366901MR52sLU5	22.34599901832	1.46866037062427	0.279010684848074	5.26381407731386	1.41097141441295e-07	2.41556635535068e-05	hervdb4
200754202-HERV0907uL	7.3784908460359	1.47206297201569	0.374454991952072	3.93121470845315	8.45177486120067e-05	0.0061397004654257	hervdb4
220327301-MALR1006uL	6.74891310993725	1.47267618727408	0.372065248304069	3.95811270734574	7.55443111850063e-05	0.00555999721472341	hervdb4
170366804-HERV0815cL	6.44605352869187	1.48270400278339	0.327990179084049	4.52057438708688	6.1672069172216e-06	0.000641722382133205	hervdb4
052843901-MALR1018uL	29.3420011586178	1.48568614474116	0.289086094394356	5.13925150171515	2.7583500568341e-07	4.27322605679718e-05	hervdb4
100577101-HERV0700cI	5.25027834978443	1.49589887090225	0.335809365536864	4.45460735888271	8.40468647227935e-06	0.000843190025906441	hervdb4
190125302-MALR1002uL	4.52488333321179	1.5078540134593	0.365571572281485	4.12464788782393	3.71302354471727e-05	0.0030083899847952	hervdb4
022962402MR52env	7.06140462536616	1.51042666954544	0.274483300206743	5.50279987309891	3.73806662377142e-08	7.49384101548907e-06	hervdb4
050018601-HERV0557uL	4.02303370132018	1.51524837858679	0.378249702915549	4.00594730652067	6.17694194222793e-05	0.00466998342656195	hervdb4
023433902-HERV0370uL	43.8045429455827	1.51898801953615	0.279345758903177	5.43766272128242	5.3984041068559e-08	1.03044785102373e-05	hervdb4
0X0715402-MALR1008uL	55.1908049226576	1.51930837244183	0.269801925082986	5.63119915461878	1.78960928916384e-08	3.90585041211092e-06	hervdb4
052681402-HERV0889cL	23.2733277183188	1.52157655377925	0.358687063230096	4.24207257456388	2.21465046785361e-05	0.0019377912389172	hervdb4
220415301-HERV0583uL	5.92975498504103	1.52312930772179	0.392815514085324	3.87746729216746	0.000105549511959091	0.00742655953772174	hervdb4
040811302-MALR0819uL	5.41573206580363	1.52713024103435	0.3102988032226	4.92148285837516	8.58909263988395e-07	0.00011481459660603	hervdb4
023608402-HERV0741uL	20.0740246471035	1.53205264844062	0.344223814007618	4.45074566632604	8.55726393415904e-06	0.000856022407158221	hervdb4
060039002-HERV0577uL	11.0531926264235	1.53435272709486	0.358881759705106	4.27537116502004	1.90819123420129e-05	0.00171212486369624	hervdb4
082001201-MALR1127uL	20.1380413771644	1.54093713741686	0.263615936037993	5.84538689343416	5.05392241079028e-09	1.29912011480922e-06	hervdb4
012777102-HERV0740cL	43.5426266180578	1.55240769495489	0.345384020639022	4.49472935106454	6.96584883135362e-06	0.000716446017029144	hervdb4
121758502-HERV0416uL	8.409403348908	1.55348020219506	0.349049179934841	4.45060550632166	8.56285121095874e-06	0.000856334474705159	hervdb4
220111102-HERV0491cL	30.8397864693644	1.5605029468862	0.267047795191262	5.84353428482175	5.1104774406402e-09	1.31074492346708e-06	hervdb4
190427001-HERV0476uL	19.6228316383161	1.57291358143069	0.260221901126085	6.04450883889503	1.49865838451092e-09	4.45113727669193e-07	hervdb4
160504802-MALR1004uL	54.4446826297949	1.58117440353136	0.252642137131022	6.25855378476058	3.88563891256541e-10	1.34570300941961e-07	hervdb4
021753001-HERV0402cL	5.96606019126557	1.58250708277022	0.389922977942951	4.05851199413479	4.93863973533092e-05	0.00386079468563761	hervdb4
220031807-HERV0766cI	6.41954582085932	1.59025849301709	0.382528102812202	4.15723310608061	3.22125261682149e-05	0.00267042303652507	hervdb4
150300002-HERV1036uL	10.3050989950344	1.59413254598868	0.327470260246462	4.86802235045374	1.12720584321755e-06	0.000146010814376019	hervdb4
200951701-MALR1126cL	3.72046836939509	1.597081206015	0.416518027075412	3.83436274590306	0.000125890243805465	0.00858146293599486	hervdb4
180254202-MALR1001uL	4.55334289392238	1.59902896543065	0.393874951923211	4.05973763404583	4.91278869004308e-05	0.00384316892876549	hervdb4
010352401-MALR1026uL	18.546697203089	1.60272475613762	0.328404985297822	4.8803301651592	1.05908384786643e-06	0.000138069386041666	hervdb4
041046501-HERV0517cL	2.14727243202858	1.60405530467716	0.391164744203721	4.10071543626068	4.11874789233003e-05	0.00329708856654295	hervdb4
010912001ERVH5LU3I	5.9374190486225	1.60425922194438	0.375077052441599	4.27714575312275	1.89304864096134e-05	0.00170389984149372	hervdb4
190198801-MALR1134cL	6.54707281996005	1.60954112423068	0.379166732935692	4.24494288243284	2.18649109317347e-05	0.00191847317105703	hervdb4
051394303HE41sLU3p	39.8761549641318	1.61207009744296	0.273675397514846	5.8904458058036	3.85155167176699e-09	1.0195007331324e-06	hervdb4
021883901-MALR1042cL	4.56471209668579	1.61930505741404	0.383229111393163	4.2254228848308	2.38492486762691e-05	0.0020675764831029	hervdb4
170260504-HERV0798cI	4.79089961497152	1.62238369032073	0.385418883766021	4.20940373877903	2.56045499653984e-05	0.00219281612265364	hervdb4
120604602-HERV0616cL	314.181571748584	1.62305870711371	0.238141486252591	6.81552270733782	9.39216365736121e-12	5.18166714209458e-09	hervdb4
110008301-MALR1002cL	41.8525552560864	1.62330152888204	0.251148302579933	6.46351781878116	1.02296483332942e-10	4.25136834086197e-08	hervdb4
190098302-HERV0561uL	13.2235766405004	1.62926784681276	0.413038230771749	3.94459332195116	7.99355197909246e-05	0.00584352729678674	hervdb4
050857802-HERV1038uL	21.7754253081601	1.62991488440842	0.297304819555118	5.48230226084932	4.19826136355261e-08	8.29186487410374e-06	hervdb4
060427601-HERV0816cI	7.76587878594602	1.63682687776522	0.343277190250848	4.76823664447123	1.85845408266987e-06	0.000224059049499141	hervdb4
052681401-HERV0889cL	43.3971385951979	1.64166065688214	0.322178027921912	5.09550780812413	3.47807684697966e-07	5.23855133437014e-05	hervdb4
040118202-HERV0404uL	7.12512206498197	1.64408459446282	0.360320364097591	4.56284117768466	5.04659909215143e-06	0.000538970371883151	hervdb4
0Y0150003-HERV0017cI	11.1157134786142	1.64648592985521	0.349830127555132	4.70652982738238	2.51969133185622e-06	0.00029175284817509	hervdb4
160379801-HERV0758cL	9.99632674484004	1.64791328686312	0.3556456808804	4.63358161073041	3.59392984077084e-06	0.000399604464384588	hervdb4
071957201-MALR0820uL	3.91327243455381	1.65555986336707	0.384403879893467	4.30682402015789	1.65615263494859e-05	0.00151720720005243	hervdb4
011760202-HERV0549uL	181.801754241439	1.66132826882931	0.216221995563467	7.68343786902874	1.54875094982514e-14	1.98320130851779e-11	hervdb4
170812402-MALR0818uL	15.3907469369759	1.66749579045529	0.323215126323542	5.15908958043662	2.48153565338205e-07	3.89833636232068e-05	hervdb4
011827402HK055LU5	7.59980179889602	1.67463670946939	0.324057894641776	5.16770841617851	2.3698163926216e-07	3.74316652056234e-05	hervdb4
140266001-MALR1023uL	22.8397180612893	1.67531609901358	0.284372683964573	5.89126942734871	3.83240115763288e-09	1.01666927396809e-06	hervdb4
150670002-HERV0489uL	4.07424896337412	1.6756149403987	0.393012320490758	4.26351758720017	2.01233653828593e-05	0.00178873213503069	hervdb4
190719512HK063LU5p	2.02687006592122	1.67675714503113	0.414142026328027	4.0487490726262	5.14921156704741e-05	0.00400645604932016	hervdb4
110922001-HERV0371uL	12.7971838422473	1.69677514602021	0.386930625429464	4.38521800681172	1.15869674622902e-05	0.0011132085960033	hervdb4
190635403HE41sLU3p	5.32246379158695	1.69701960759762	0.37928496251297	4.47426018778582	7.66763282895752e-06	0.000779842304895908	hervdb4
160012601-HERV0422uL	4.22603250032065	1.69712718515801	0.424070350523946	4.00199444045352	6.28107749299666e-05	0.00473825805452864	hervdb4
150442507ERVW5LU5	4.04618715181601	1.71177842026133	0.446556354524676	3.83328644395484	0.000126442573641879	0.008611992523102	hervdb4
122003201-MALR1026uL	2.97976817964424	1.71391907706633	0.411170076456682	4.16839448005624	3.06752710879468e-05	0.00256134085008164	hervdb4
220246602-HERV0552uL	86.6005678351375	1.72246171534748	0.234654481263077	7.34041688049582	2.12929577158521e-13	1.91924212637792e-10	hervdb4
220412001-MALR1045uL	3.78809806456484	1.727524832601	0.414152253960259	4.17123127082334	3.02958189790291e-05	0.00253575858709664	hervdb4
210448302-HERV0867cL	5.80930596662674	1.72979889791577	0.374982718687762	4.61300964473547	3.96879879053531e-06	0.000435977384074569	hervdb4
071407102-HERV0406uL	3.74509453876834	1.7350852534257	0.388285326828723	4.46858311025249	7.87394192516567e-06	0.000798024289768813	hervdb4
190172201-HERV0912uL	8.9279832215377	1.74105700420737	0.366701446347569	4.74788692967725	2.0555289033096e-06	0.000244619218116082	hervdb4
190026402-MALR1004uL	5.49711879111506	1.74923358066776	0.42745432787148	4.09221165072327	4.27278388620495e-05	0.00340078317474964	hervdb4
031784901-HERV0912uL	18.7596057727947	1.74974015166953	0.305534731934616	5.72681259701753	1.02335106639039e-08	2.40272859985652e-06	hervdb4
060626502-MALR1013uL	5.35536943265118	1.75134555826618	0.411027358774496	4.26089777451293	2.036073530541e-05	0.00180659226941534	hervdb4
011679202-MALR0818cL	5.16992878987688	1.75255446853599	0.385507804807643	4.54609335188549	5.46508045051033e-06	0.000576792037085187	hervdb4
042087201-HERV0454cL	2.33391542757742	1.75982533736543	0.379235503421844	4.64045513008808	3.47642657411876e-06	0.000388243838918311	hervdb4
190086102-MALR1126uL	38.0991823870915	1.7611482025996	0.29451536227808	5.97981778939168	2.23387354558183e-09	6.35930104830031e-07	hervdb4
082062203HK08sLU3p	5.15452470035636	1.76313186144845	0.396299916803059	4.44898367799719	8.62775716866996e-06	0.000861583969114202	hervdb4
161217601-MALR1018uL	6.06955571615983	1.76726128433684	0.404856997444286	4.3651494119971	1.27035896788669e-05	0.00120513933580109	hervdb4
081867102-MALR1133cL	2.79672556787689	1.77549136056535	0.419126338121553	4.23617224468109	2.27362393235476e-05	0.00198339109352878	hervdb4
041581204-HERV0116cL	4.81978998948712	1.77762901905439	0.383398127677663	4.6365093899178	3.54342105456784e-06	0.00039500095546294	hervdb4
190194201ERVFsLU3p	12.9687804975572	1.78604145816578	0.386235915616147	4.62422417479374	3.76003051039575e-06	0.000415675625268408	hervdb4
011212601-HERV0499uL	4.822727932783	1.79087506974903	0.436740902958647	4.10054349756794	4.12180948669972e-05	0.00329877843190622	hervdb4
091622701-MALR1026cL	41.4384129767819	1.79192545514466	0.294070753187061	6.09351809292236	1.10455844413786e-09	3.38607660145512e-07	hervdb4
091622702-MALR1026cL	45.0353014398094	1.79560242738691	0.309239938132133	5.80650234970517	6.37913778168744e-09	1.591929678124e-06	hervdb4
130119607ERV9env	7.14909230575956	1.80174802524982	0.337190409334619	5.34341421158813	9.12120076362685e-08	1.63671059089401e-05	hervdb4
091224501-HERV0583uL	6.42441048606386	1.80180150499212	0.411720246303894	4.37627617579485	1.20724035557436e-05	0.00115124085790441	hervdb4
170877602-HERV0931uL	24.9555099384565	1.80324674676716	0.297028985791761	6.07094537242023	1.27159441725578e-09	3.81953652766363e-07	hervdb4
150670001-HERV0489uL	5.11829851282583	1.80834660224636	0.412698225569665	4.38176490763976	1.17721795735727e-05	0.00112570453447815	hervdb4
121582501-MALR0819uL	3.18772509497703	1.80945066933365	0.466928315677004	3.87522154596709	0.000106527734287976	0.00748141554783979	hervdb4
023183701-HERV0488uL	4.74388315097359	1.81336671836348	0.382788038769616	4.73726066308688	2.16626458654143e-06	0.00025665317064582	hervdb4
190087402-MALR1127uL	3.67596616212855	1.81509648516131	0.462703173742287	3.92280967187026	8.75222905533342e-05	0.00632486157180717	hervdb4
110818201-HERV0513uL	4.63372507156117	1.82469277194597	0.407793125842486	4.47455500427141	7.65706139548764e-06	0.000779223884299742	hervdb4
220279802ERVH3LU3I	11.9929972113317	1.82613773364913	0.274509982369975	6.65235456242145	2.88440798015229e-11	1.3853192156677e-08	hervdb4
021014501-MALR1003uL	3.95606692278573	1.83132119714462	0.459660828425756	3.98407061009858	6.77447290413615e-05	0.00507091800516248	hervdb4
090518101-MALR1009uL	8.49409295662785	1.83154779452841	0.403029877189476	4.54444669784953	5.50797423788295e-06	0.000579815935191343	hervdb4
0X2198303-HERV0116cL	12.8218019547828	1.83471332059752	0.37798543611768	4.85392595926979	1.210409434148e-06	0.000154766500308783	hervdb4
040137301-HERV1034uL	3.44892027104918	1.8381689393966	0.483621153891933	3.80084478233419	0.000144203615581479	0.00963634482555068	hervdb4
210593802-HERV0796uL	6.82970037068153	1.84049645752693	0.383623902832017	4.79765844604542	1.60531212231601e-06	0.000197614548664811	hervdb4
011614502-HERV0739uL	13.4028385983192	1.842453831536	0.371822591570473	4.95519603516829	7.22574007811406e-07	9.86030799019718e-05	hervdb4
052716203-HERV0187cL	127.121058232314	1.84345318146261	0.210990422621809	8.73714151834712	2.39082906193161e-18	8.82622873480326e-15	hervdb4
060618101-HERV0811cL	27.9681582732376	1.8496991191543	0.428590736465588	4.31577017834778	1.59047387340884e-05	0.00146710856871434	hervdb4
030585602-MALR1022uL	4.90001762522387	1.84996036972006	0.468185960199219	3.9513367058954	7.77158919213603e-05	0.0057089265060437	hervdb4
170864202-HERV0198cI	5.21948212601925	1.85484177901991	0.483822050623598	3.8337272487461	0.000126216088624572	0.0085982542352766	hervdb4
020054801-MALR1126uL	6.25992284799212	1.86141925529331	0.373875057374717	4.97872007927958	6.4006134269207e-07	8.87037089221255e-05	hervdb4
023610002-MALR1005uL	12.6235535578073	1.86643876056891	0.377297353532127	4.94686417250466	7.54185625780885e-07	0.000102153589328057	hervdb4
170875202-HERV0543uL	6.79557615476161	1.86714036837094	0.329741171636183	5.66244233046831	1.49233537805856e-08	3.35408175449405e-06	hervdb4
051366502-MALR1003cL	18.3535599304438	1.8695915299916	0.354836399943439	5.26888315372836	1.37256295681083e-07	2.35678771535128e-05	hervdb4
110820901-HERV0201cL	73.4880955515515	1.87524723560147	0.237301259222067	7.90239058043347	2.73604486869532e-15	4.37540225960668e-12	hervdb4
060407303-MALR1046cI	9.90905902320555	1.88009751003403	0.408224336453431	4.60554979736861	4.11377524245559e-06	0.000449625916421083	hervdb4
010447101-MALR1018uL	27.1793876272483	1.88334590227848	0.329838393652586	5.70990502780031	1.13039234962732e-08	2.62387125864665e-06	hervdb4
190528801-MALR1023cL	6.2656122284948	1.88558698226998	0.463573448784063	4.06750426974583	4.75193381421501e-05	0.00373672348109878	hervdb4
170803101-MALR1003uL	4.55785823856241	1.88833778825379	0.422192168936618	4.47269733356252	7.72390661467736e-06	0.000784645806037862	hervdb4
190631601ERVHsLU3II	9.612388225711	1.89056713770647	0.363809032391693	5.19659208370341	2.02975079711362e-07	3.2883479066964e-05	hervdb4
130339901-HERV0558uL	2.53007620525765	1.8995613552172	0.443228138342398	4.28574179049475	1.82130434083265e-05	0.00164762521469173	hervdb4
190711505HK01pol	24.6103417441862	1.9050557707245	0.292710746132498	6.50832193862182	7.59949173651275e-11	3.30887781983018e-08	hervdb4
111638001-HERV0490cL	7.52954017783656	1.90694139820702	0.452073598884505	4.21821005011663	2.46249368253306e-05	0.00212224934765833	hervdb4
180207201HR46sLU3p	4.87758166365951	1.90778065442278	0.493800782070351	3.86346219709102	0.000111791200264038	0.00778054198067114	hervdb4
101691202-HERV0925uL	4.44368990346954	1.91902290360498	0.438869038253408	4.37265502082858	1.22744600848158e-05	0.00116762147440592	hervdb4
160981801-MALR1002cL	3.80806884966995	1.92856812200759	0.487762697450575	3.95390654530938	7.68854501750194e-05	0.00565031531548819	hervdb4
071377302-HERV0618uL	2.66843097818134	1.9306909293741	0.501058288285383	3.85322621042935	0.000116571599991685	0.00805028390629141	hervdb4
130119603ERV95LU5p	4.22347445732496	1.93904016594035	0.40248262358577	4.81769908142912	1.45223166219808e-06	0.000181474048043204	hervdb4
120064202-HERV0741cL	3.95188540852719	1.94882264326805	0.425911972127467	4.57564654389382	4.74751505243528e-06	0.000510718447342095	hervdb4
071811602-MALR1010uL	4.26444019613222	1.95731734789178	0.512250066758524	3.82101921484856	0.000132901295936481	0.00897264741554042	hervdb4
101434101-MALR1004cL	41.796177204228	1.9573821751662	0.284899382817736	6.87043318875294	6.40072362602071e-12	3.72681059178138e-09	hervdb4
041467101-HERV0489uL	10.3097633263565	1.96328196267177	0.329627327170493	5.95606553474949	2.58382753054269e-09	7.24850306911013e-07	hervdb4
041465301-HERV1036uL	6.36069677179257	1.9690009092549	0.395672775540856	4.97633658662367	6.47989317306798e-07	8.94808009915659e-05	hervdb4
011740801-HERV0466cL	9.09435629443391	1.97478878053736	0.33883558909886	5.82816222401357	5.60410886722246e-09	1.41641504668867e-06	hervdb4
100493702-MALR0819uL	5.11432238036015	1.97862429190019	0.434775543242752	4.5509098261202	5.34144379610414e-06	0.000565981015610399	hervdb4
120173311ERVL5LR	6.56799118665186	1.98116758934318	0.40174468707163	4.93140955710994	8.16383649220891e-07	0.000109594372902373	hervdb4
150660003-HERV0707cI	3.57633037630159	1.98120009658724	0.468583725126073	4.22805998235255	2.35714959045115e-05	0.00204647998718628	hervdb4
041581205-HERV0116cL	4.81711653149953	1.98332061847641	0.435422867873329	4.55492985052267	5.24030630028474e-06	0.000556453822620811	hervdb4
220250701-HERV0552uL	23.7796924205226	1.98499021883705	0.289836885607427	6.84864597091221	7.45522391593475e-12	4.26212817678365e-09	hervdb4
011215303ERVHsLU3I	15.0358447228794	1.99513209240453	0.30724651569943	6.49358736538547	8.38161227023153e-11	3.60419713756598e-08	hervdb4
101593001-MALR1022cL	2.93543441698849	2.00048389283739	0.512249585139926	3.90529138699241	9.41119155198914e-05	0.0067282070300191	hervdb4
150400602-HERV0118cI	7.54589378329238	2.00113703878433	0.441850069323159	4.5289956429106	5.92647209714567e-06	0.000619832533800931	hervdb4
220279401-HERV0484uL	8.22278956552622	2.00190905546425	0.366881013090497	5.45656216602969	4.85441370076338e-08	9.40055046003855e-06	hervdb4
130266001-MALR1007uL	6.3840255930032	2.00487236557172	0.499374822493899	4.01476461219911	5.95051511021784e-05	0.00452343429035662	hervdb4
030056602PBLAsLU3p	7.22654286070756	2.00821126763177	0.40853879177347	4.91559506237856	8.85131865322968e-07	0.000118001713370871	hervdb4
190719510HK063LU3p	11.0801971696729	2.01973284644289	0.313321764637906	6.44619389520234	1.14693914468969e-10	4.67148852101191e-08	hervdb4
071406801-HERV0495uL	7.01229912631232	2.0207931145765	0.415618619289651	4.86213326542086	1.16127394679075e-06	0.000149584437793665	hervdb4
220263302-MALR1022uL	61.0924536472323	2.02264199599685	0.251986090994871	8.0268001619106	1.00047855922334e-15	1.8467344128813e-12	hervdb4
010330302-MALR1001cL	5.5131993991124	2.03104753423503	0.491871834370212	4.12922105376407	3.63994317795059e-05	0.00296231960978521	hervdb4
061975402-HERV0802uL	12.2098724876601	2.0434692712516	0.419058742043059	4.87633132598301	1.08077019886993e-06	0.000140625749685731	hervdb4
160025402-MALR1042uL	1.87896823041613	2.0456195938279	0.533441458857127	3.83475929713177	0.000125687318057762	0.00857064513900662	hervdb4
190423701-MALR1018uL	2.45915313774216	2.04571188897902	0.49513000992822	4.13166612396528	3.60143272047105e-05	0.00293441930654582	hervdb4
141119502-MALR1041cL	8.50273723697431	2.05743249721341	0.394721060466389	5.21237071764659	1.86442495800292e-07	3.06922556416591e-05	hervdb4
011721202-MALR1015cL	7.99803940222048	2.06046634133378	0.397831108264707	5.17924892882634	2.22781027098471e-07	3.54793354858703e-05	hervdb4
190034401-MALR1127cL	4.09076776873269	2.06726433639436	0.460618166560326	4.48802172053198	7.18876010342943e-06	0.000735883047519788	hervdb4
170471502-HERV0490uL	52.0016226337252	2.06983076733228	0.302936550056487	6.83255542108183	8.34151630947924e-12	4.68393687656228e-09	hervdb4
120061901-MALR1004uL	3.38110713239403	2.07557108279993	0.468729114200973	4.4280822759177	9.50746366639989e-06	0.000937561819128755	hervdb4
060395802-HERV0483uL	1.88496012786979	2.07809425983825	0.492570174837206	4.21887959522734	2.45519336766968e-05	0.00211677317378567	hervdb4
021259001-HERV0488uL	4.00745578436571	2.08545276743721	0.481869470281306	4.32783750798689	1.50580492629034e-05	0.00139829923875106	hervdb4
190630102-HERV0892cL	12.9150350942777	2.08841397618678	0.374271807419725	5.5799393242696	2.40602500693616e-08	5.09109023114017e-06	hervdb4
010330301-MALR1001cL	4.69229846912052	2.09473029662589	0.519443393921546	4.0326440207694	5.51527932981118e-05	0.00424464899762935	hervdb4
0X0925501-HERV0516uL	3.13493990133139	2.09931116096693	0.518171169023672	4.05138550051406	5.09152403957187e-05	0.00397047342070164	hervdb4
190706701-HERV0763cL	4.429808060535	2.09997499514928	0.477136456878323	4.40120423597145	1.07651734600452e-05	0.00104379169994548	hervdb4
190232803ERVIsLU3	4.23893903006852	2.10126601804302	0.505154674103391	4.15964876851352	3.18737359125354e-05	0.00264978483919768	hervdb4
041520601-HERV0489uL	4.59753482297081	2.11173336983704	0.498740377640302	4.23413355828199	2.29434565750994e-05	0.00199795189477816	hervdb4
190410601-HERV0183cI	5.60526453373521	2.11343090971372	0.432738773139711	4.88384919701059	1.04034653136749e-06	0.000136080306564322	hervdb4
011384502-MALR1134uL	21.2825889186002	2.11779224665825	0.294461650570426	7.19208169401924	6.38108278856375e-13	5.02898188031325e-10	hervdb4
101367702-MALR1133uL	42.3482514476257	2.12985571938984	0.30998640297327	6.87080368351992	6.38412009771165e-12	3.72339051480319e-09	hervdb4
062429601-HERV0617uL	5.48550042902974	2.13249142137243	0.446097126415956	4.78032987682603	1.75007797417043e-06	0.000212867878933271	hervdb4
220249302-HERV0552uL	7.54240543508429	2.13907266461616	0.373550057833545	5.72633471674988	1.02623648995695e-08	2.40625313522373e-06	hervdb4
150855001-MALR1022uL	12.899453389394	2.14014841740633	0.36145283557219	5.92096175983351	3.20064283596356e-09	8.69082219824785e-07	hervdb4
210031502HR46sLU3p	18.8419182130663	2.14910656292643	0.490601123157874	4.38055777184769	1.18375901135464e-05	0.00113071305290473	hervdb4
070066202-HERV1052cI	8.25125937781449	2.15678582574933	0.450594110212334	4.78653798810861	1.69682833872499e-06	0.000207335693698713	hervdb4
220240602-HERV0755cL	41.8412973253643	2.1623501059931	0.309689169690261	6.9823239480922	2.90336689040935e-12	1.86925116569546e-09	hervdb4
091622801-HERV1035uL	35.3925948813727	2.16691288862364	0.349472931341468	6.2005171053044	5.62779427823125e-10	1.86666258137179e-07	hervdb4
160353401-HERV0700cI	10.0216214352751	2.17327721252233	0.382730747899754	5.67834495777581	1.36004227599805e-08	3.07868147825729e-06	hervdb4
170864201-HERV0198cI	6.15060080837794	2.17369259267072	0.416884600356331	5.21413501677145	1.84676926148956e-07	3.04449344001002e-05	hervdb4
030699101-MALR1131uL	5.27469588223244	2.17749803598591	0.44475065409278	4.89599737728921	9.78083702862455e-07	0.000128859000215387	hervdb4
200929201-HERV0564uL	2.53060782304591	2.18166052805141	0.573307054039489	3.80539627531103	0.00014157733668692	0.00948641965188162	hervdb4
220007003ERVH5LU5	1.89279881592995	2.18632222484116	0.511223994385311	4.27664242847203	1.89733185158758e-05	0.00170661508330203	hervdb4
052259501-HERV0489uL	5.31189576392838	2.1866049460724	0.414392947541746	5.27664613754587	1.31569597627482e-07	2.27037701485275e-05	hervdb4
170301201-HERV1031cL	2.73914099550381	2.19509509912462	0.515574726669248	4.25756924375545	2.06661660532069e-05	0.00182622178349474	hervdb4
0X1761202-HERV0904uL	3.21395030488337	2.19735159312484	0.555443729753278	3.95602916266762	7.62058623184786e-05	0.0056039326852635	hervdb4
082058302-HERV0418uL	1.76794610996698	2.19824758128481	0.577098994687273	3.80913431061516	0.00013945419391302	0.00935861426642741	hervdb4
013067004-HERV0201cL	5.27896865106926	2.21398462870856	0.447839029322786	4.94370629566723	7.66511564033949e-07	0.000103580546320507	hervdb4
131576402-MALR1013uL	1.40058489268958	2.21830941472348	0.545819525242657	4.06418112971916	4.82013847867468e-05	0.00378149489306759	hervdb4
011829401-HERV0883uL	27.0477539833744	2.22777506048402	0.347187519351233	6.41663347993304	1.39320798789223e-10	5.51907575294932e-08	hervdb4
060392902-MALR1002uL	2.89466533312342	2.23293700051671	0.464455849797167	4.80764103087916	1.52721676376102e-06	0.000189344323458502	hervdb4
200531901-HERV0402uL	6.34111816052398	2.23359864857392	0.520198168538371	4.29374569858595	1.75683693249234e-05	0.00159805387238137	hervdb4
110814201ERVRpol	3.03431575729632	2.23891827123817	0.531585185016142	4.21177702905731	2.53369576165044e-05	0.00217365414884533	hervdb4
091758002-HERV0923cL	6.25467368984765	2.23904540518491	0.447941790463327	4.99851867553808	5.77724122163045e-07	8.12983880263665e-05	hervdb4
011615302-MALR1018uL	5.26057220116336	2.23975752104604	0.47851630539785	4.68062947026194	2.85995428761637e-06	0.000325931473526645	hervdb4
070028801-MALR1019uL	5.95490400985224	2.2415062988504	0.425708307721623	5.26535718987225	1.39917049410386e-07	2.40009957915928e-05	hervdb4
161222001-HERV1035uL	2.62178018071064	2.24342478954698	0.452764884592623	4.95494431191479	7.23510076949078e-07	9.86808547547072e-05	hervdb4
072122902-MALR1045cL	3.60150503095787	2.24937313248194	0.583878313093938	3.85246905397572	0.000116932758421748	0.00807040688693612	hervdb4
011760201-HERV0549uL	82.1105065472813	2.25601082393272	0.257710569235489	8.75404850730529	2.05832561790118e-18	7.84923248268205e-15	hervdb4
042033402-HERV1035uL	3.610868950148	2.25707201114683	0.512233625700784	4.40633316108239	1.05135217325921e-05	0.00102282094523244	hervdb4
062060002-MALR1045uL	2.33002494932667	2.26132262567668	0.581159248860435	3.8910550423327	9.9809286139144e-05	0.00708875646986425	hervdb4
021635705-HERV0806cI	5.46773300328641	2.26499823203049	0.416717641701532	5.43533079804852	5.46948657326855e-08	1.04344212790305e-05	hervdb4
140213602-MALR1130uL	6.79272518556575	2.26947993316646	0.432799914722416	5.2437162207438	1.57374187909637e-07	2.64978120758865e-05	hervdb4
101251401-MALR1001uL	4.76445203196002	2.28268068846031	0.470284644861725	4.85382781130666	1.21100895752836e-06	0.000154786124656167	hervdb4
161217402-MALR1003uL	5.54674935297564	2.28942103878895	0.458245298577562	4.99606007065545	5.85134406215067e-07	8.21081041830783e-05	hervdb4
120422501-HERV0971uL	2.72396132119086	2.29781192206793	0.602872619242409	3.81143851740264	0.00013816042172399	0.00927896836591038	hervdb4
140467702-HERV0588uL	4.61006268785589	2.29820344658123	0.48826162582374	4.70690983077763	2.51500083523404e-06	0.000291306939199906	hervdb4
010308701-MALR1127uL	5.28153489575772	2.29951658179722	0.504012278195249	4.56242175296057	5.05669414205609e-06	0.000539618482523798	hervdb4
021620602-HERV0116cI	2.62063241930091	2.30352921164419	0.539087329847644	4.27301678986819	1.92845929700541e-05	0.00172679087945171	hervdb4
060035401-HERV0918uL	1.43032534941598	2.30746787004383	0.600160231053507	3.8447530353575	0.000120673909019015	0.00828740548343138	hervdb4
030654202-MALR1015cL	3.30702070394625	2.30868817309722	0.471576223991816	4.89568399686174	9.79643809036839e-07	0.000129015557727501	hervdb4
220007005ERVHpol	20.0135191683404	2.30960803617887	0.369952832956084	6.24297972723739	4.29312563237347e-10	1.46766148431529e-07	hervdb4
101422002ERVH5LR	3.89936213181381	2.3157071268957	0.58679253071434	3.94638139663545	7.93411953659135e-05	0.00580978813056266	hervdb4
190191501-HERV0173cL	8.24296181312163	2.31777163035549	0.400848241701578	5.78216738713057	7.37442754174089e-09	1.81109260122783e-06	hervdb4
051378004-HERV0172cI	2.59962236138103	2.32595822913833	0.506897173713508	4.58861944740873	4.46186974400414e-06	0.00048416448985751	hervdb4
120828902ERVLsLR	1.09418427294838	2.32803585981003	0.607451804214521	3.83246184085394	0.000126867282714374	0.00863752883020248	hervdb4
190359601-HERV0911cL	3.22852665702638	2.33459035527214	0.551508863882122	4.23309670644047	2.30495330680795e-05	0.00200618233390644	hervdb4
060414402-HERV0537uL	41.9542409050946	2.33728331153965	0.312746030986176	7.47342277748351	7.81353001191676e-14	8.02204492525252e-11	hervdb4
072122901-MALR1045cL	3.73380251804338	2.34418141986014	0.540271757741681	4.33889313344592	1.43202132233611e-05	0.00133873932994902	hervdb4
060039101-HERV0569cL	17.0120203461708	2.34571709007122	0.378155924241867	6.20304202498995	5.53820426129438e-10	1.83969580267298e-07	hervdb4
190406402-MALR1012cL	1.77868894803809	2.34755126860509	0.595037851757408	3.94521333671756	7.97289628091299e-05	0.00583211312690225	hervdb4
120286204-HERV0806cI	4.67054107444315	2.3526090367881	0.499219346031907	4.71257585565952	2.44604980766682e-06	0.000284542465188062	hervdb4
190570103-HERV0539cI	2.36862087473399	2.35298520753939	0.537986654418819	4.37368694597321	1.22165533373329e-05	0.00116306950318828	hervdb4
190120503-HERV0547cI	2.40665959881522	2.35691420391519	0.50194436550457	4.69556860459216	2.65866115507414e-06	0.000305196359256972	hervdb4
030770402-HERV0911uL	2.65121304254482	2.36155406469647	0.550310808862748	4.29130961388305	1.77622453279373e-05	0.00161188660400126	hervdb4
041467002-MALR1018uL	9.42991174300308	2.36476516827544	0.395289007117697	5.98237017902027	2.19913772912951e-09	6.27070480495088e-07	hervdb4
110817902-HERV0625uL	8.99864158891189	2.3666940008656	0.417511456895784	5.66857259070701	1.43992063570099e-08	3.24257792992186e-06	hervdb4
023088901-MALR1003cL	2.46519064171479	2.3752513045475	0.563411947140761	4.2158341096627	2.48856651286098e-05	0.00214129023380366	hervdb4
030582601-HERV0912cL	3.46169448756536	2.3798937894784	0.557180070317953	4.27131894383861	1.94320257794375e-05	0.00173706892992797	hervdb4
061275202-MALR1015cL	1.66988987154456	2.38304007846795	0.619691878192543	3.84552414244732	0.000120295018935789	0.00826792978235241	hervdb4
021752901-MALR1008uL	2.52521882643691	2.38764281275154	0.616741012842193	3.87138647022729	0.000108218057435257	0.00757591896130381	hervdb4
190553001-HERV0628uI	4.17135787452133	2.39250985045716	0.487348440764812	4.90923875062064	9.14306116503433e-07	0.000121285362595192	hervdb4
0X1221702-MALR1023uL	0.907733013057985	2.39880515000222	0.626536198390494	3.82867766645327	0.000128833610047706	0.00875306830259768	hervdb4
0X2274002-HERV0500uL	3.79614486439506	2.40723569911605	0.551486949305164	4.36499123351695	1.27127856778886e-05	0.00120535270107675	hervdb4
081327502-HERV0417uL	2.97081642659723	2.41189393033929	0.531767180146166	4.53562013676047	5.74344732658648e-06	0.000602324294733164	hervdb4
140268601-HERV0799uL	3.26221531395036	2.41642417426775	0.602388520349073	4.01140475397419	6.03585275320914e-05	0.00458027907810767	hervdb4
170694102-HERV0492uL	12.7259141692807	2.4191497536433	0.402360280391084	6.01239702709212	1.82799948220916e-09	5.33517561241566e-07	hervdb4
041467102-HERV0489uL	9.67998912094188	2.4239333475907	0.391235055278123	6.1955934543431	5.80658269284181e-10	1.90814424817231e-07	hervdb4
060617002-HERV0583cL	2.71738641953591	2.43891924114675	0.600029857194067	4.06466313618446	4.81018847546638e-05	0.00377559567706446	hervdb4
150279101-HERV0429uL	171.325214719584	2.44306063297519	0.363327133499033	6.72413482980811	1.76638813919566e-11	9.12160732237617e-09	hervdb4
150712501-HERV0426uL	2.55038136835007	2.44731783796221	0.631949179044679	3.87264976221954	0.000107658481635826	0.00754435506810668	hervdb4
150742702-HERV0402cL	2.60137884817261	2.44880308686013	0.635374522468951	3.85410966329674	0.000116151528869408	0.00802539624084516	hervdb4
010098601-HERV0809cL	3.4433854252707	2.45514819345888	0.51998277326287	4.72159525219063	2.34001996361736e-06	0.000273965495200573	hervdb4
0X2266602-MALR1004uL	2.97876821646578	2.45704381071191	0.51443803645288	4.77617057178268	1.78664859990047e-06	0.000216632703402328	hervdb4
120536402-MALR1043uL	2.20577736531026	2.46171938756535	0.642699099514724	3.83028292621554	0.00012799600507898	0.00870583568845697	hervdb4
170067001MR41sLRp	3.99588938716926	2.46308043160806	0.474849264553864	5.18707854359258	2.13618652119791e-07	3.42876709799306e-05	hervdb4
111687201-MALR1001uL	2.69142276472427	2.47147644127834	0.622853409903294	3.96799054477693	7.24812089020214e-05	0.00536413502093825	hervdb4
190143401-MALR1018uL	7.97875326870963	2.50156817768866	0.538765499154435	4.64314842285697	3.4313966129509e-06	0.000383869520511355	hervdb4
030082301-HERV0537uL	2.7502669503246	2.50229684738404	0.553334337987481	4.52221500744936	6.1195851085468e-06	0.000637723250560934	hervdb4
021927801-HERV0421cL	324.511698868322	2.50525279190668	0.304553640910591	8.22598207795571	1.93597964325567e-16	4.39100428629139e-13	hervdb4
150556501-MALR1022uL	3.93136971421731	2.5179224198262	0.512592414844372	4.91213359173617	9.0090633812925e-07	0.000119736697609197	hervdb4
013080104HE41env	4.20946128396784	2.52468466503872	0.607165503442702	4.15814905610325	3.20836658857797e-05	0.00266164803626184	hervdb4
052190202-HERV0402uL	15.4862956731762	2.5328263915745	0.391329211971647	6.47236729099082	9.64792481306689e-11	4.05329645112648e-08	hervdb4
111036301-HERV0402uL	2.0553850437988	2.53346784928508	0.593446219800987	4.26907740710638	1.96283148173849e-05	0.00175145739468473	hervdb4
120095502-HERV0500uL	4.25326654612635	2.54882017500638	0.598632659731036	4.25773658281785	2.06507072002029e-05	0.00182532053301437	hervdb4
010057501-MALR1004uL	5.43049316566019	2.56961074594219	0.470242517761692	5.46443728264575	4.64377523568085e-08	9.03297579756708e-06	hervdb4
090491701-HERV0615uL	33.5748158155559	2.58081895876956	0.416522416949886	6.19611059032164	5.78754693069761e-10	1.90369150321392e-07	hervdb4
190232601-HERV0955cL	2.58100131945647	2.58853407611584	0.681599687752337	3.79773365896317	0.000146025103904646	0.00973556802247653	hervdb4
071212203-HERV0882cI	12.239446029897	2.59084870836705	0.366820311585736	7.06299140624742	1.62955804565418e-12	1.12423306760022e-09	hervdb4
060529902-HERV1034uL	9.00688670079774	2.59153783149548	0.443191276625034	5.84744774588168	4.99172568707842e-09	1.28408350476646e-06	hervdb4
200371903-HERV0501cI	4.00775482930897	2.59803162947047	0.434511445519162	5.97920182831156	2.24233596196725e-09	6.37815922558914e-07	hervdb4
070632101-MALR1043uL	3.47652887250373	2.59825725287862	0.608537050365025	4.26967799465962	1.95755375983295e-05	0.00174749052451964	hervdb4
012289302-MALR0818uL	20.3690436893427	2.61342339263965	0.407622427958406	6.41138272427524	1.44205668573625e-10	5.67372461546705e-08	hervdb4
160023802-HERV0527uL	5.76870831680312	2.61820320124051	0.511715949371767	5.11651670121848	3.11229738887675e-07	4.75993583026889e-05	hervdb4
190152502ERVFsLRp	0.826186778368954	2.61874101644228	0.631103840609295	4.14946138485552	3.33258498099238e-05	0.00275219809639213	hervdb4
140662502-MALR0820uL	7.60940644222144	2.6204256201427	0.42403684257493	6.17971213121569	6.42185910810228e-10	2.0846712326414e-07	hervdb4
010057402-MALR1127uL	0.909114654058444	2.62150609482469	0.689418378523834	3.80248942657692	0.000143249382053312	0.00958180861412064	hervdb4
190636001-HERV0909cL	6.41361208271025	2.63575608318571	0.528567182976364	4.98660561623172	6.14493210840655e-07	8.58114422639534e-05	hervdb4
060395801-HERV0483uL	3.70743195982027	2.63933539081625	0.499238254546582	5.2867250591871	1.2452558528783e-07	2.16064343032914e-05	hervdb4
190550101-MALR1001cL	26.4059984021901	2.63968259382206	0.38143341264147	6.92042832729822	4.5028009038237e-12	2.73653584876515e-09	hervdb4
190672302-MALR1133cL	78.9659820899885	2.64121541402951	0.349513774048777	7.55682782808128	4.1301808592279e-14	4.60853814073718e-11	hervdb4
031601002-HERV0419uL	37.0388441615674	2.64421833708457	0.335349208697627	7.88496966297831	3.14611939054992e-15	4.91786644553438e-12	hervdb4
181143001-MALR1003uL	2.12433155924548	2.65452406360526	0.692670269647884	3.83230547047252	0.000126947972268922	0.00864132705703439	hervdb4
070896402-HERV0517uL	2.54390003065551	2.65470436324223	0.588426901198679	4.51152786834585	6.43623249503404e-06	0.00066612031029726	hervdb4
011790805-HERV0183cL	28.5379256167148	2.6593907892573	0.350498474346159	7.58745325273753	3.26254259275282e-14	3.74889910773868e-11	hervdb4
190097601-MALR1002cL	2.21177349637535	2.66740395116037	0.643287147022607	4.14652144614764	3.37564574740697e-05	0.00278114099540638	hervdb4
082002702-MALR1022cL	3.63574895716344	2.67850710748884	0.586570306922594	4.56638714213385	4.96201987595415e-06	0.000531456832516546	hervdb4
020405501-HERV0950uL	4.22661845206629	2.68152660524037	0.679091948228371	3.94869444739552	7.85785737729604e-05	0.00576375748693568	hervdb4
190481602-HERV0491uL	6.16479401141464	2.68912345199332	0.47321638083368	5.68265081452973	1.32622872765461e-08	3.01393512161561e-06	hervdb4
200058502-MALR1026uL	6.00393914041557	2.69170201979742	0.659886363962001	4.0790387054466	4.52223080610836e-05	0.00357635490960739	hervdb4
161088201-MALR1022uL	3.72294728571178	2.70024304186716	0.58078994482532	4.64925928199272	3.33129222779413e-06	0.000373272531123384	hervdb4
023188801-HERV0526uL	3.98788369613174	2.7077781156582	0.572662593590889	4.72840053805338	2.26295432990627e-06	0.000266290407447973	hervdb4
110814001RRHIsLU3	34.4277426577223	2.71028832715346	0.396619732862852	6.83346818775317	8.28858837846165e-12	4.66176003094613e-09	hervdb4
190097101-MALR1019uL	4.60585383159438	2.71193843111775	0.563035968293315	4.8166344316123	1.45999815284808e-06	0.000182182149946545	hervdb4
060039201ERVTsLU3	8.5456599316785	2.71310436390956	0.445549277847508	6.08934746122098	1.13371825802305e-09	3.4723999108487e-07	hervdb4
101593101-MALR1017cL	5.64510736552803	2.71485297229981	0.516449146867512	5.25676727082729	1.46609650772576e-07	2.50007277695819e-05	hervdb4
060615402-HERV0514uL	9.75764284237694	2.7243423900822	0.401747201720548	6.78123550933214	1.19152455296428e-11	6.36127462107175e-09	hervdb4
190202102HRLQuLU3p	4.51768388521484	2.72458147744038	0.453861087795935	6.00311758532031	1.93564330662927e-09	5.60222635751867e-07	hervdb4
170685102-MALR1004cL	3.81989657514756	2.72720145822991	0.600010597173775	4.5452554856128	5.4868659600656e-06	0.000578387674806186	hervdb4
170369401ERVRpol	1.28055448553489	2.72807883649995	0.634968134085372	4.29640274850888	1.73592072351176e-05	0.00158068540927066	hervdb4
200731101-MALR1005cL	1.84541493621176	2.73556497690491	0.71035649353015	3.85097482999049	0.000117648591158602	0.00811497000672986	hervdb4
121193103-HERV0372cI	3.974708174607	2.7441812823709	0.524537077555709	5.23162498856804	1.68026363091733e-07	2.8073427308663e-05	hervdb4
120248404-MALR1046cL	1.55226167894976	2.74461861898043	0.659181934655436	4.16367390349537	3.13167298464883e-05	0.00260987790377722	hervdb4
033005601-HERV0540uL	3.90794772060854	2.75159964402228	0.538341855626911	5.11124969248021	3.2003465488793e-07	4.87526013780551e-05	hervdb4
030206502-MALR1014uL	4.20924566981099	2.75168840659199	0.598904073692612	4.59453947211635	4.33706029252061e-06	0.000471801461664734	hervdb4
210427202-HERV0489uL	2.35409509983771	2.75444274318744	0.663656829178321	4.1504021688404	3.31891604094055e-05	0.00274156211503735	hervdb4
101608701-HERV0933cL	3.81059042366763	2.7598942553947	0.516387216394732	5.34462157034695	9.06061483983356e-08	1.62744024933698e-05	hervdb4
060414401-HERV0537uL	10.867949050165	2.76137209005823	0.406783173082671	6.78831444558557	1.13451170766034e-11	6.10384888050063e-09	hervdb4
011721601-HERV0417uL	3.41415499773283	2.77098303707649	0.618648876343987	4.47908845070906	7.49624688774094e-06	0.000764427738755175	hervdb4
011694503-MALR1016cI	3.28771506345727	2.77307264826016	0.641482716712954	4.32291093120913	1.53983910693498e-05	0.00142608744832821	hervdb4
021060302-MALR1044cL	1.50713459911272	2.78787728394601	0.710459381354273	3.9240488015399	8.70730848621863e-05	0.00629502123101581	hervdb4
190115501-MALR1004cL	2.15713591897161	2.79246139145354	0.713830108845124	3.91194117038766	9.15572178016348e-05	0.00657536956157353	hervdb4
110996401-MALR1041cL	3.71748881755396	2.79715482924437	0.613967161546538	4.55587041853923	5.21690916883406e-06	0.000554308579231107	hervdb4
060392901-MALR1002uL	4.16448426577034	2.80570668791377	0.561861825596644	4.99358838791793	5.92676425452617e-07	8.30321248125019e-05	hervdb4
180424501-MALR1001uL	0.722611153992746	2.80736824853657	0.643390804041853	4.36339504839107	1.28059389963434e-05	0.00121285942972464	hervdb4
100417302-MALR1043uL	6.23565534013193	2.82051713158035	0.51061832978154	5.52372871688148	3.31879770701661e-08	6.73502444613395e-06	hervdb4
052491201-HERV0590uL	3.18928455771494	2.82477950657595	0.611639412706346	4.61837391098953	3.86758876108921e-06	0.000425938004402785	hervdb4
220267702-MALR1023uL	3.29375126513814	2.83277564418673	0.581152699610602	4.87440847488932	1.09134967499119e-06	0.000141895902665959	hervdb4
041450602-HERV0954uL	7.14133297690875	2.83736901576226	0.727791958618746	3.89859901880094	9.67508364384092e-05	0.00689980995907455	hervdb4
160392202-MALR1022cL	50.0896623261095	2.83873608199512	0.36482870764639	7.78101071132418	7.19474027232571e-15	9.82960145394672e-12	hervdb4
061876201-HERV0183cL	6.5682588933201	2.84255208441984	0.494825025650858	5.74456007086736	9.21602747444031e-09	2.19431453555015e-06	hervdb4
110701201-MALR1023cL	2.05365909620493	2.85021341402551	0.658905017886821	4.3256817548096	1.52060827255969e-05	0.00141015895976394	hervdb4
110923402-MALR1004cL	3.57688792880861	2.85100997932746	0.617286850494792	4.61861446917621	3.86310849838428e-06	0.000425579654320416	hervdb4
190016802-MALR1127uL	10.4154703492415	2.85833424480025	0.442926443951828	6.45329328115508	1.0944525942725e-10	4.49463833449044e-08	hervdb4
081895101-HERV0741uL	2.75415520893545	2.87560714196294	0.692678956851802	4.15142846988229	3.30406534175674e-05	0.00273059479613342	hervdb4
022525308-HERV0183cI	2.79946281439965	2.88232008671431	0.68099395647994	4.23251933337711	2.31088041132171e-05	0.00201083681127598	hervdb4
170087201-HERV0541cL	3.06267982518121	2.88643547635412	0.647591764796955	4.45718372786771	8.30434260994276e-06	0.000835296513768793	hervdb4
190450802-HERV0740uL	1342.53576505478	2.88895550375267	0.291926105794748	9.89618758448374	4.32446893331187e-23	4.16854780343857e-19	hervdb4
160556501HK10pol	10.0376584569191	2.89184500013781	0.363656035715215	7.95214355359266	1.83311659876148e-15	3.16481652787169e-12	hervdb4
051204802-MALR1007cL	2.28976091368852	2.89680602810831	0.716379595626589	4.04367467442256	5.26199204758845e-05	0.00407957211875367	hervdb4
190471101-HERV0464uL	3.96213316629301	2.89869757993988	0.575510786216838	5.03673892716186	4.73529936531534e-07	6.85541754589792e-05	hervdb4
042228301-MALR1010uL	1.6684601974153	2.90161670713699	0.752857154797439	3.85413977757532	0.000116137235086555	0.00802539624084516	hervdb4
120640301-HERV1038uL	2.71390675442978	2.90184596240175	0.669656507784364	4.33333496900201	1.46867385068278e-05	0.00137005161199984	hervdb4
190516602-HERV0911uL	2.6618306900921	2.90192348294964	0.668977661178906	4.33784810965993	1.43884531506832e-05	0.00134403257398387	hervdb4
170088401-HERV0912cL	2.42181648308505	2.90205685895605	0.646561555397923	4.48844635863014	7.17444838108892e-06	0.000734851557616728	hervdb4
121615802-MALR1041cL	5.52866711635846	2.90586803781631	0.480404953366746	6.04878866766791	1.45938943747063e-09	4.34337326407426e-07	hervdb4
011035903-HERV0897uL	3.7338484033604	2.90643596417432	0.646415966026303	4.49623170980906	6.91683586995476e-06	0.000712038084720172	hervdb4
200652601-HERV1030cL	4.48941852570645	2.91253480631446	0.545070933639796	5.34340509934285	9.12165950893035e-08	1.63671059089401e-05	hervdb4
051316902-HERV0540cL	5.10916084805248	2.91494717768555	0.580416226133605	5.02216693200194	5.10917469729938e-07	7.31128166373951e-05	hervdb4
032792101RRHIsLU3	5.65949990452488	2.91630990488204	0.467198314209707	6.24212420332712	4.31667954571932e-10	1.47148736341407e-07	hervdb4
022980501-MALR0819cL	3.44196186373488	2.91734214269668	0.569981803277081	5.11830750722843	3.08289664002404e-07	4.72121267440927e-05	hervdb4
042986905-HERV0468cI	2.47561847282555	2.91743968846144	0.61119205721352	4.77335995130942	1.81177552531251e-06	0.000219134064283214	hervdb4
020936901-HERV0490cL	20.5742784168963	2.9281074554739	0.4279289700193	6.84250812779008	7.78184886904554e-12	4.43424826689028e-09	hervdb4
030585601-MALR1022uL	3.51824738899855	2.93874892512398	0.592650955484508	4.95865044665536	7.09845565735839e-07	9.70187507765463e-05	hervdb4
140065101-MALR1042cL	8.32058317142935	2.940691249952	0.500424701711267	5.87639107321426	4.19307092204205e-09	1.09817318593738e-06	hervdb4
190086101-MALR1126uL	3.19513795947337	2.9436362478323	0.571474312821654	5.15095111326719	2.5916874453879e-07	4.06034933317612e-05	hervdb4
012290402-HERV0617uL	5.18705456706868	2.95004814606637	0.492284524065191	5.99256730986674	2.06553898296167e-09	5.95829873538952e-07	hervdb4
041465201ERVLsLU3	27.2873589457424	2.95062933983598	0.366795352533757	8.04434767085667	8.67060378827678e-16	1.62641779816638e-12	hervdb4
190423611HK025LU3	2.50193301267455	2.95224610254021	0.720820244332082	4.09567589944118	4.20938476721408e-05	0.00335725281985436	hervdb4
150742202-HERV0901cI	4.15866375226161	2.95401138559213	0.50675904211796	5.82922284572579	5.5686099230665e-09	1.40846867019135e-06	hervdb4
011223701-HERV0501uI	24.9968162777824	2.96384931368756	0.436937335846678	6.78323656627866	1.17512974239646e-11	6.28341330056119e-09	hervdb4
050699401-MALR1046cL	5.9448038968741	2.96661395643459	0.60370431316266	4.91401815715581	8.92284807784877e-07	0.000118772794015155	hervdb4
100374102-MALR1024uL	1.73192254172496	2.97020291302131	0.755303350101233	3.93246357589068	8.407972285454e-05	0.00611821770498914	hervdb4
060394902-HERV0749uL	3.37638474926766	2.97462941225328	0.658862225351584	4.51479732453313	6.3377347959424e-06	0.000657237846873663	hervdb4
031847401-HERV0765cI	8.87341950776394	2.98601480215835	0.464074884215973	6.43433830124861	1.24012376858364e-10	4.9866483218296e-08	hervdb4
0X2266802-MALR1022uL	21.5164929561825	2.99432792106047	0.400697317198656	7.47279253575825	7.8510577368361e-14	8.0367966248875e-11	hervdb4
101437901-HERV0762cL	4.72006291817512	2.99439775795179	0.672044065061615	4.4556568737457	8.36367109690238e-06	0.000839803571772878	hervdb4
0X0955401-MALR1003uL	1.75226440428741	3.0076315154088	0.705335617372053	4.26411404915956	2.00696920125125e-05	0.00178487558231217	hervdb4
121399907HK055LU3orR	0.844735389578773	3.01745397361472	0.674315891793274	4.47483740237844	7.6469483245844e-06	0.000778651410679953	hervdb4
170394103-HERV0769cI	16.32336453574	3.03341162195207	0.474020200722384	6.3993298541482	1.56060375335481e-10	6.07130845839893e-08	hervdb4
042442302-HERV0118cI	16.5027726039292	3.0339668349792	0.431631572018148	7.02906606389682	2.07920522599373e-12	1.3983058091557e-09	hervdb4
023219003-HERV0217cI	0.765789360547865	3.03454004404291	0.772216640928919	3.92964860274518	8.50700899821948e-05	0.00617207247033687	hervdb4
170015802-MALR0818cL	2.49464660746581	3.03633468034752	0.690619717704544	4.39653633180295	1.09991957021527e-05	0.00106440069508115	hervdb4
150070201-HERV0517cL	4.47429023298532	3.04706794063457	0.609028912047373	5.00315811016465	5.6398646263224e-07	7.96883478268079e-05	hervdb4
120641202-MALR1015cL	2.03598077958951	3.0521771626584	0.710301332905898	4.29701736609688	1.73111637851464e-05	0.00157738240877602	hervdb4
010287301-MALR1045cL	2.57589521114494	3.05542109217061	0.685915178451473	4.45451739246906	8.40821132048213e-06	0.000843299853304541	hervdb4
060035902-HERV0402cL	32.5767788103016	3.05572403278943	0.422203339895221	7.23756480360335	4.56812494766265e-13	3.80151251639782e-10	hervdb4
042088702-MALR0818cL	1.82262060556696	3.05575710465625	0.750416711170409	4.07208029774584	4.65951094524342e-05	0.00367320192689317	hervdb4
012781601-HERV0487cL	7.2199146638394	3.05825741322825	0.572977460627978	5.33748292625059	9.42457744733733e-08	1.68496489735961e-05	hervdb4
190021101-MALR1009uL	5.86484267851074	3.06188218853343	0.58709948826108	5.21526972813819	1.83549949505787e-07	3.03129432999059e-05	hervdb4
141177101-HERV0765cI	2.15593809679425	3.06583614108858	0.726932826700288	4.21749579669569	2.47030423249599e-05	0.00212715874630461	hervdb4
101037902-HERV0402cL	2.04544441791724	3.06861145575594	0.768624062061659	3.99234373111491	6.54234460528103e-05	0.0049130586992526	hervdb4
011270701-HERV0492uL	1.75190225673462	3.07009762484374	0.688056112320595	4.46198728543996	8.12030452433224e-06	0.000819397521382312	hervdb4
010309902-MALR1126uL	2.236449583953	3.07982677671275	0.740885059678994	4.15695624642121	3.22515728007442e-05	0.00267238318847045	hervdb4
190450801-HERV0740uL	175.214441051639	3.08549754832381	0.330531625611265	9.33495408379662	1.01035033948235e-20	6.49281064457713e-17	hervdb4
020950501-HERV0418cL	2.68663433510876	3.08591928177568	0.650384293913162	4.74476292040919	2.08750680240784e-06	0.000248254492999167	hervdb4
121304301-MALR1018cL	4.25449281257433	3.10789353026495	0.60404233883327	5.14515842758301	2.67295135704789e-07	4.16509914648747e-05	hervdb4
042477302-MALR1041uL	3.83525505412251	3.11586245417499	0.574339269445323	5.42512521768567	5.79139257148069e-08	1.09701367366552e-05	hervdb4
140210201-HERV0816cI	15.1612054940247	3.11669867052607	0.465800099621998	6.69106484317051	2.21552457352757e-11	1.1078261347342e-08	hervdb4
060407301-MALR1046cL	5.0435757970557	3.12332254149565	0.583011494007848	5.35722292544306	8.45108243451538e-08	1.52983548587665e-05	hervdb4
190097602-MALR1002cL	4.25045490335959	3.1256521516631	0.651967218506378	4.79418606172224	1.63336627336692e-06	0.00020028648911088	hervdb4
020936802-MALR1041uL	8.67849462009803	3.12875094424313	0.458343873608706	6.82620871445132	8.71880576783587e-12	4.87214167078004e-09	hervdb4
011152703-HERV0116cI	9.47602485580781	3.12924410633359	0.452647599648103	6.9132015916274	4.7383582843598e-12	2.83500877903196e-09	hervdb4
071437501-HERV0541uL	3.57706874227399	3.13086873338144	0.729305020280077	4.2929482813365	1.76316087718663e-05	0.00160254606495889	hervdb4
190074602-HERV0425uL	8.28770220064544	3.13163322458034	0.504827986919378	6.20336690065575	5.52677845848933e-10	1.83883284819268e-07	hervdb4
082290002-HERV0436uL	2.42934318601196	3.13192330351218	0.709432230632107	4.41468990029059	1.01154886114154e-05	0.000989646703674477	hervdb4
170838602-MALR1007cL	5.98533289008969	3.14477841520262	0.522704544039152	6.01635943491448	1.78383253901854e-09	5.22384445308198e-07	hervdb4
141305501MR413LU3	2.03886381920556	3.15138105816242	0.749437863200696	4.20499311938086	2.61090099723443e-05	0.00223326316011904	hervdb4
0X0932201-HERV0425uL	26.2178987413508	3.15521043472798	0.391803743871911	8.0530379917949	8.07638204560511e-16	1.53151152866988e-12	hervdb4
081891702-MALR1010cL	6.16101755228788	3.15806524980378	0.589693276723508	5.35543709663916	8.53498364999815e-08	1.5418063645093e-05	hervdb4
010057602-MALR1003cL	4.31984293433941	3.17108250075316	0.562287566534624	5.63960985354261	1.70435890161089e-08	3.74807747805456e-06	hervdb4
141255302-MALR1126uL	293.127171343766	3.17250899969107	0.333433590613587	9.51466525569001	1.82298858209577e-21	1.31794478699765e-17	hervdb4
080348301-HERV0553cI	13.831129985471	3.17428556201038	0.456822013066205	6.94862653553946	3.68859575833683e-12	2.30218794974469e-09	hervdb4
030563602-MALR1018uL	20.5318793551834	3.18786173255885	0.389640687999227	8.18154220219725	2.80233919245528e-16	6.00573981808197e-13	hervdb4
030695501-HERV1038uL	1.65079984625668	3.19459244244758	0.819982757679009	3.89592636251278	9.78241093241131e-05	0.00696061562797903	hervdb4
170451401-MALR1009uL	2.84043871934769	3.19496427647909	0.674121123047432	4.73945136452026	2.14297662814483e-06	0.000254154391489686	hervdb4
190362801MR52env	6.17268718617972	3.19629498860877	0.486431916508284	6.57089898942587	5.00123797950932e-11	2.26275046108126e-08	hervdb4
111510001-HERV0813uL	55.4656098248877	3.20653427163596	0.403942437140548	7.9380970574287	2.05306662368008e-15	3.42526528725703e-12	hervdb4
121602702-MALR1004cL	2.36100566368495	3.21176987277143	0.723597925442129	4.43861122295091	9.05411931477056e-06	0.000898216262038788	hervdb4
032835703-MALR1132cI	4.09948937905622	3.21677007412309	0.549763671000689	5.85118705328031	4.88076929929643e-09	1.25833919928815e-06	hervdb4
050371602-HERV0909uL	3.28120484937264	3.22314932961084	0.697071069319546	4.62384607749846	3.76689433755593e-06	0.000416169268710175	hervdb4
011753203-MALR1011cI	24.6659952163525	3.22696205552709	0.404608298975136	7.9755211736905	1.51739138797873e-15	2.67097056595197e-12	hervdb4
100395602-HERV0610uL	3.00073889915314	3.22772683999416	0.744887232954652	4.33317514006937	1.46974093846671e-05	0.00137049444892222	hervdb4
011827401HK05gag	9.24217155419293	3.23799174707424	0.464357044422104	6.97306476981294	3.10109761539456e-12	1.98550349537679e-09	hervdb4
0X0953902-MALR1003cL	2.98803640947517	3.26272517221339	0.765538781271726	4.26199854538172	2.02606762479878e-05	0.00179863388886588	hervdb4
170015801-MALR0818cL	2.17621543015046	3.26334812011834	0.799828487129876	4.080059878623	4.50241012846444e-05	0.0035663692371142	hervdb4
110817901-HERV0625uL	11.6373624326287	3.26574862284012	0.474643659901657	6.88042188010425	5.96755641822116e-12	3.50993462415442e-09	hervdb4
140795905ERVHgag	1.17417518042835	3.27436712741498	0.858384061759925	3.81457120802269	0.000136419597523911	0.00917626065763665	hervdb4
141259502-MALR1003uL	11.3331130690979	3.27944082007654	0.479515450609694	6.83907226744581	7.97076711947271e-12	4.52703045139021e-09	hervdb4
061579302-MALR1133uL	2.90262657521561	3.28785995812058	0.699481106127789	4.70042711563951	2.59617906199242e-06	0.000299509992716958	hervdb4
042469001-MALR1002uL	4.19146297061054	3.30205818984822	0.671905352092761	4.91446924713936	8.90232971009e-07	0.000118545962982395	hervdb4
160181902-MALR1004uL	1.93477845157282	3.3154631425066	0.825045394274053	4.01852209044065	5.85643194184207e-05	0.00446364817144309	hervdb4
060278501-MALR1026uL	17.5308618959217	3.32167454403603	0.409980556915285	8.10202944507533	5.40498570472232e-16	1.06570348821178e-12	hervdb4
062267602-HERV1036cL	2.49313724698679	3.32853798223764	0.806772408096185	4.12574593384062	3.69535046799883e-05	0.0029954695617962	hervdb4
040028102-MALR1003cL	3.14196794463883	3.32939431733907	0.757071643461206	4.39772688106192	1.09390510897647e-05	0.00105917118001399	hervdb4
220419302-MALR1126cL	2.97408305118076	3.33465358154159	0.761602730158989	4.37846852366911	1.19516198299002e-05	0.00114066312248954	hervdb4
170689601-MALR1026uL	22.7043553804978	3.33952353630558	0.439672133850701	7.59548599784488	3.06639390404535e-14	3.57080541134838e-11	hervdb4
072130301-MALR1127cL	2.57361490714394	3.34288670060161	0.776659996434728	4.30418293197434	1.67603136147457e-05	0.00153339415517771	hervdb4
110464602-MALR1012uL	3.90103861556421	3.34545764432219	0.60744943118661	5.50738460284187	3.64203995582509e-08	7.32672872736477e-06	hervdb4
052190301-HERV0933cL	9.20665952958141	3.34551857363259	0.509966651345668	6.56026931330636	5.37106855478215e-11	2.4143370594307e-08	hervdb4
100399101-HERV0799cL	4.40178702686826	3.34700768388549	0.604124290678679	5.54026337879151	3.02017069366149e-08	6.18689276336724e-06	hervdb4
111509501-HERV0606uL	12.7098762319699	3.35017816047887	0.477071247169153	7.02238539915824	2.18111890411635e-12	1.44721201167582e-09	hervdb4
010229102-MALR1018uL	2.23179720082995	3.3534192846985	0.806968542142156	4.15557622084822	3.24468749854974e-05	0.00268600061008285	hervdb4
190194101-MALR1004uL	1.98178025355051	3.36968069536967	0.790137383389797	4.26467696150925	2.00191627021111e-05	0.00178083820581559	hervdb4
060615802-MALR1020uL	10.360831359281	3.37067804576295	0.434658708059966	7.75476939322686	8.85041558826183e-15	1.19295491119651e-11	hervdb4
070073501-MALR1026cL	5.44094572084306	3.37725682588938	0.564310329026936	5.98475103532647	2.16721098125174e-09	6.20642804841136e-07	hervdb4
190153302-MALR1041uL	5.97019752280964	3.37825164787427	0.641946932149982	5.26250921795042	1.42102537047958e-07	2.43157901412142e-05	hervdb4
052720701-MALR1126cL	2.67861555877919	3.37854370853519	0.742477777117137	4.55036340838815	5.35533424008911e-06	0.0005669335228785	hervdb4
110798902-MALR1020uL	3.29402022805552	3.38784094432342	0.708913311689062	4.77892132713876	1.76238131881883e-06	0.000214139203521187	hervdb4
070022801-HERV0590uL	2.95238615624342	3.38817204585365	0.762725706385232	4.44218939717023	8.90481234158845e-06	0.000884922101597372	hervdb4
070422002-MALR1025uL	6.97105528023616	3.39882677665635	0.501351066775438	6.77933488506713	1.20730387189749e-11	6.43561581606557e-09	hervdb4
131357202-MALR1018uL	2.70660228496041	3.40028742575467	0.859088587092138	3.95801722528295	7.55745088075866e-05	0.00556104029822068	hervdb4
041455901-HERV0949uL	30.6419120187895	3.40706026793396	0.431183477324317	7.90164847938113	2.75238722478649e-15	4.38134593919912e-12	hervdb4
220007007ERVH3LU3II	11.5631982309844	3.41579572760763	0.487036830117211	7.01342386526616	2.32555539589491e-12	1.53716996853991e-09	hervdb4
190032001-MALR1022uL	13.5867272659689	3.41621152992446	0.433227436749723	7.88549209984134	3.13298411274771e-15	4.91786644553438e-12	hervdb4
0X1767504-HERV0806cI	2.89229107200177	3.42253713723959	0.700272659441638	4.88743504561288	1.02158183701414e-06	0.000133985026243158	hervdb4
041373202-MALR1004uL	2.10051818145014	3.42768076349583	0.816113927588503	4.20000277856319	2.66911704796477e-05	0.00227273118134579	hervdb4
010315101-MALR1011cL	1.22178804851571	3.43008062566019	0.80691969859194	4.25083268092924	2.1297723211888e-05	0.00187249452976675	hervdb4
110041001-MALR1022uL	3.21487241975914	3.43428615861916	0.70725742777638	4.85577955599076	1.19914046660959e-06	0.000153551927942015	hervdb4
052173904-HERV0940cI	2.94944307461007	3.43621376129581	0.775936404570836	4.42847344325383	9.49024012589293e-06	0.00093639554406806	hervdb4
130477802-MALR1004uL	3.92554046386375	3.43791269900259	0.814237502673866	4.22224803907075	2.41877717738169e-05	0.00209004994047558	hervdb4
010116702-MALR1133cL	3.87520017393155	3.44052033563982	0.68972731489222	4.98823268464792	6.09341510488753e-07	8.51605682520367e-05	hervdb4
012535101-MALR1126uL	3.18677309937306	3.44668808149239	0.631779151151912	5.45552678528264	4.88278702018905e-08	9.45022170522033e-06	hervdb4
141306301-HERV0739cL	1.71451909956846	3.45072607754119	0.890119892624053	3.87669807869199	0.000105883614424908	0.00744402995902178	hervdb4
110814601ERVLsLU3	8.65977779121769	3.4766804559562	0.531703410025247	6.53875899684585	6.20313895610059e-11	2.75622699173627e-08	hervdb4
012841502-MALR1010cL	1.61301250161857	3.4887287788515	0.799247164613767	4.36501864919022	1.2711191362015e-05	0.00120535270107675	hervdb4
041308308ERVWenv	1.33394415277351	3.49205949361913	0.908914681031318	3.84201021998764	0.000122030753779601	0.00835908254571598	hervdb4
010911101-MALR1018cL	7.5487529927326	3.4945002273623	0.591339910774356	5.90946114695061	3.43228617395103e-09	9.24745301307832e-07	hervdb4
120641002-HERV0548uL	1.72962492331767	3.50781020682685	0.911700123140615	3.84754824288405	0.000119305789202889	0.00820969561157772	hervdb4
011660701-MALR1041cL	2.16693168716062	3.51811423059864	0.741582782391504	4.74406136999729	2.09475341278694e-06	0.000249030945291307	hervdb4
030643601-MALR1002cL	3.54130233471069	3.52445783567055	0.685407482245296	5.1421350466221	2.71633744539407e-07	4.21944234691428e-05	hervdb4
021418002-MALR1003uL	2.35579952156485	3.53166848826053	0.910440336554982	3.87907735022376	0.000104853412284011	0.00738595971069723	hervdb4
042228302-MALR1010uL	1.85763595139867	3.53520328108488	0.830134774891512	4.25858955438517	2.05720802671337e-05	0.00182068944001549	hervdb4
050646701-HERV0914cI	1.35198183734667	3.53526518335097	0.92426699185951	3.82493934597671	0.000130804286065068	0.00886037543437437	hervdb4
0X0352702-HERV0815cI	5.58035261995932	3.53921551787355	0.731262284265691	4.83987153997353	1.2992308204731e-06	0.000164667304353753	hervdb4
011683302-MALR1023uL	3.37480093722278	3.54025378039228	0.64501023937176	5.48867841825346	4.04952101406076e-08	8.03467571354698e-06	hervdb4
032683903-HERV0217cI	1.94506925233715	3.54027985719655	0.864907658360855	4.09324605115183	4.25375911165161e-05	0.00338797219858927	hervdb4
060559501-MALR1002cL	3.21011706709924	3.55064464944821	0.822252659274875	4.31819174969825	1.57312733888076e-05	0.00145342558343557	hervdb4
100374202-MALR1019cL	2.62434749301855	3.5528214221791	0.805174645366849	4.41248546836741	1.0219065546214e-05	0.000998091788867773	hervdb4
090534301-HERV0766cI	3.8228594703883	3.56052682797462	0.674906161069789	5.27558797556516	1.32331107823575e-07	2.28238275531497e-05	hervdb4
110736102-HERV0371uL	6.33948860126632	3.57011361337286	0.596453694367802	5.98556710618907	2.15637191543461e-09	6.18944732914902e-07	hervdb4
070896702-HERV0740uL	13.5077559866293	3.57670984478103	0.496697649954471	7.20098000284254	5.97813156259054e-13	4.75809911662883e-10	hervdb4
170392402-HERV0911cL	2.59479822141944	3.57806592926737	0.885009429071304	4.04296927437491	5.27785391483863e-05	0.00408730387308034	hervdb4
013035404HFRDgag	4.47326324967912	3.58321573765594	0.675613318500888	5.30364875814868	1.13510622472027e-07	1.99142852427921e-05	hervdb4
0X0987302-MALR1006uL	1.13315865621436	3.58783427571515	0.84790020090132	4.23143463334633	2.32205479320923e-05	0.00201904147917681	hervdb4
170807401-HERV0474cL	4.99949464791913	3.59796337850442	0.63190691471469	5.6938186538581	1.24229031929892e-08	2.84554182576311e-06	hervdb4
062149605ERVHpol	2.8107276431353	3.60342246387939	0.675429235220891	5.33501109513113	9.55387153078317e-08	1.70369193145549e-05	hervdb4
161163501-MALR1126uL	8.09318482508366	3.61677321710546	0.511025240569583	7.07748449582304	1.46794609695351e-12	1.022904928845e-09	hervdb4
101437102-MALR1014uL	2.46635225423779	3.61679284488121	0.78114223830788	4.63013349875427	3.65430054526767e-06	0.000405537376149276	hervdb4
121304302-MALR1018cL	4.95068535611177	3.61684381480671	0.692257280536173	5.22471040247546	1.74427886828547e-07	2.89755697880528e-05	hervdb4
050852402-HERV0513uL	6.04955752118873	3.62189293328741	0.620537293902981	5.83670468942626	5.32433420093084e-09	1.35657155242806e-06	hervdb4
020698603-HERV0862cI	16.3512898660564	3.62603111940454	0.416740102700278	8.70094117631006	3.29142855613049e-18	1.13088271044396e-14	hervdb4
022260002-HERV0198cI	1.8137136413596	3.62763791409654	0.821379473217583	4.41651883493755	1.00303164654602e-05	0.000981590642934009	hervdb4
120892901-HERV0958cI	1.31995518509081	3.63227607792453	0.923693372712762	3.93233965429137	8.41230908529995e-05	0.00611871619949862	hervdb4
100298202-MALR1042uL	4.24119596445365	3.63339849104189	0.655326627555663	5.54440844956093	2.94949605187807e-08	6.06000071002207e-06	hervdb4
130446201-MALR1041uL	5.47801838810625	3.63367028930858	0.622364593042627	5.8384913440275	5.26756190183999e-09	1.3460598904098e-06	hervdb4
110041601-MALR1044cL	1.1766629329729	3.64540681661915	0.910097624213456	4.00551184799506	6.18833317252268e-05	0.00467655787789377	hervdb4
011556501-HERV1034uL	1.25597629489103	3.64818816770863	0.775728720797429	4.70291748893658	2.56470083632877e-06	0.000296272464787886	hervdb4
141255401-MALR1041uL	63.295915071381	3.66073498675042	0.328315593192207	11.1500491071933	7.15668612289901e-29	1.37972956576023e-24	hervdb4
170768702-HERV1035cL	3.17521697258969	3.66124395715621	0.848410954239291	4.31541334875736	1.59304532644302e-05	0.00146909005894833	hervdb4
110928602-HERV0799uL	4.61588363032401	3.67938509360483	0.671512322194871	5.47925179031499	4.27128170852361e-08	8.41214630245098e-06	hervdb4
141259501-MALR1003uL	19.2895801882112	3.68551455693484	0.484612153832229	7.60508073887628	2.84726083326436e-14	3.37355916099186e-11	hervdb4
180585702-HERV0116cI	2.589575247276	3.69295174033878	0.733788213923465	5.03272152681913	4.83565311648029e-07	6.98031757271627e-05	hervdb4
161148701-HERV0753cL	5.11903921937296	3.69313595661565	0.662523864046173	5.57434404560297	2.48464272708093e-08	5.22558011607045e-06	hervdb4
0X1170401ERVH5LU3I	2.24885166909174	3.70732083126026	0.960489703703583	3.85982360556816	0.000113468902792154	0.00786732840098569	hervdb4
010790301-HERV0958cI	4.79538358433118	3.71038368946298	0.673467058719399	5.50937665239083	3.60106628414228e-08	7.24850360744231e-06	hervdb4
121586101-MALR1019uL	1.95319906219304	3.71484284529095	0.721224303278338	5.15074551482121	2.59453043125704e-07	4.06113644679666e-05	hervdb4
190191302-HERV1034cL	2.65572882484254	3.71519033972004	0.83876246179393	4.42937125699934	9.45082102093182e-06	0.000933036674447727	hervdb4
210448701-MALR1020uL	1.81233159072101	3.72153018433501	0.91527448644494	4.06602635542697	4.7821530093359e-05	0.00375623073177851	hervdb4
111532102-HERV0741uL	1.80627981730413	3.73025521639294	0.789246003487827	4.726353000089	2.28588133447241e-06	0.000268714952807796	hervdb4
180384602-HERV0490uL	1.84010071522815	3.735883393507	0.951737388996718	3.92533007182288	8.66108936901743e-05	0.0062668290926531	hervdb4
130153201-HERV0949cL	9.32715697597512	3.73608028572563	0.673599452106452	5.54644199018024	2.91541292311126e-08	6.00063222169673e-06	hervdb4
010455504-HERV0890cI	6.5254817306084	3.74179718784329	0.630334200814981	5.93621158903545	2.91683321203573e-09	8.03924939638732e-07	hervdb4
020409002-HERV0897uL	1.00896382102453	3.75482563245529	0.957739315627415	3.92050902702632	8.83621258528175e-05	0.00637022739803032	hervdb4
220007002ERVH5LR	7.04731491202563	3.76030196637759	0.569300486749764	6.60512691258322	3.97176942569086e-11	1.83771123480432e-08	hervdb4
110002201HS49sLU3p	1.6758619201528	3.76562089789209	0.912395050388743	4.12718251407401	3.67234924367442e-05	0.0029810026538945	hervdb4
052783704-HERV0700cI	5.92892014053337	3.76846196825557	0.657649943728232	5.73019431415455	1.00315652700639e-08	2.35850527101462e-06	hervdb4
121749701HFRDsLU3	1.85573678079789	3.77238217247041	0.813925606613697	4.6347997185704	3.5728322760657e-06	0.000397513387765412	hervdb4
082062301-MALR1022uL	8.45446319001001	3.77653539006168	0.546015627110324	6.91653352496196	4.62828928226934e-12	2.78838358807831e-09	hervdb4
170464702-MALR1017uL	7.05418909488574	3.77900639050107	0.645602746876937	5.85345463411018	4.81465629073992e-09	1.24406703351643e-06	hervdb4
120680402-MALR1018uL	3.71339219071746	3.78580862438733	0.701617294059279	5.39583139760444	6.82069734838227e-08	1.26708693460151e-05	hervdb4
170363002-HERV0473cL	2.7936737707608	3.78982843974877	0.747845633691485	5.06766138493258	4.02733011260994e-07	5.96050454763343e-05	hervdb4
120179602-MALR1008uL	2.36082553870796	3.79147089038931	0.864122660496959	4.38765358636565	1.14580078911643e-05	0.00110234485677622	hervdb4
170685601-HERV0557uL	2.00467519879778	3.79550347283935	0.930319236024406	4.07978608403167	4.50771630366224e-05	0.00356975744339769	hervdb4
170644802-HERV0489uL	5.51717283142525	3.8100264035396	0.599366363725873	6.3567571257338	2.06057396498695e-10	7.72203431241653e-08	hervdb4
190147902-MALR1017uL	10.3251055466348	3.81048467362463	0.546149763209966	6.97699592732351	3.01558446421175e-12	1.93432184985353e-09	hervdb4
091178802HFRDgag	17.7491219801302	3.81761024107144	0.509531907560556	7.49238700152988	6.76321506008731e-14	7.09816774005737e-11	hervdb4
040028101-MALR1003cL	3.87473935758641	3.83029419234511	0.655734330848112	5.84122869911523	5.18172109979691e-09	1.32705598232585e-06	hervdb4
042905301-HERV0489uL	1.74788812619548	3.84049258250504	0.978534092133647	3.92474070487522	8.68232067166672e-05	0.00628088163327452	hervdb4
010117201-HERV1036uL	3.80655791155965	3.86255077283852	0.750967812474633	5.14343052881376	2.69766438897501e-07	4.19795289803635e-05	hervdb4
061528901-MALR1003cL	4.7177398400211	3.87028385969698	0.701245180327892	5.51915930158307	3.40625305229712e-08	6.89637067799385e-06	hervdb4
100399102-HERV0799cL	6.2951464947387	3.87573719548499	0.592952398119148	6.53633783720056	6.30434230319603e-11	2.79403942024915e-08	hervdb4
031717701-MALR1007uL	1.69956526224198	3.8793671333165	0.934647577081434	4.15062022139977	3.31575549933567e-05	0.00273960350804634	hervdb4
220130401-MALR1041uL	4.29579254782566	3.9136668687142	0.607309280880048	6.44427311079939	1.16155755919085e-10	4.71442928877672e-08	hervdb4
141079501-MALR1044uL	1.95753696954931	3.92206765182337	0.873425630074137	4.49044259382503	7.10753295416491e-06	0.000729289203357276	hervdb4
220130402-MALR1041uL	4.72101217667044	3.92367015259238	0.73965837557509	5.30470590499526	1.12854793008925e-07	1.981926633095e-05	hervdb4
070870403-HERV0884uL	2.85129620053291	3.93206450997688	0.784758480604116	5.01054095898387	5.42772441891991e-07	7.70674684064479e-05	hervdb4
180980602-MALR1025uL	13.8231265133431	3.93320835150723	0.454060807209219	8.66229432062591	4.62362725076175e-18	1.48571032231624e-14	hervdb4
160023801-HERV0527uL	6.69296476635945	3.93433960117063	0.687387652526384	5.72361110460828	1.04283313868498e-08	2.43692899519502e-06	hervdb4
091686302-MALR1002uL	1.89676987223773	3.94238914743725	1.03250579469614	3.81827314450807	0.00013438908422928	0.00906251457622323	hervdb4
022590801-HERV0566uL	6.89509577063022	3.94407970776417	0.522492753134319	7.5485826054132	4.40020587660839e-14	4.87846467508193e-11	hervdb4
071641602-HERV0118cI	1.28052825526509	3.95011434272491	0.985053579238291	4.01005024090101	6.07058295824328e-05	0.00460260803620185	hervdb4
023471802-MALR1045cL	2.62984066663323	3.95179417847722	0.863080300019943	4.57870974275037	4.67852882547937e-06	0.000504362557632137	hervdb4
041581902-MALR1126cL	1.17603705009233	3.95370639993595	0.908384244642821	4.35246034181334	1.34618228752586e-05	0.001267712828812	hervdb4
180836102-MALR1017cL	9.66678322394673	3.95646630330488	0.542304057838136	7.2956605176017	2.97197411774126e-13	2.55914257652251e-10	hervdb4
160389302-HERV0416uL	1.64123633290283	3.97279339993411	0.998684301162992	3.97802728580764	6.94893989941724e-05	0.00519031666787725	hervdb4
121747302-MALR1022uL	4.48350954768918	3.97859506187305	0.773137047567195	5.14604115065028	2.66041086495967e-07	4.14742038795284e-05	hervdb4
060057702-HERV0797cL	10.3783666158364	3.97866355726424	0.546906903280679	7.27484610890409	3.46815584778304e-13	2.95705022677561e-10	hervdb4
190011701-MALR1014cL	7.44810637060651	3.98090618982078	0.598447468543647	6.65205619385194	2.89026300878889e-11	1.38533020622917e-08	hervdb4
052799301-HERV0700cI	5.27652572107689	3.99476723512173	0.684242773023614	5.83823080435205	5.27580391341402e-09	1.34717400591092e-06	hervdb4
032966501PRM4pol	10.1342525343288	3.99718479665823	0.553195819973105	7.22562364417823	4.98807395734222e-13	4.0824561902757e-10	hervdb4
061029801-HERV0817uI	1.59927877993006	4.00505406879851	1.02634433539633	3.90225183758813	9.53019262090023e-05	0.00680403549754963	hervdb4
170063801-MALR1022uL	2.60829704713282	4.01369020575144	0.806287540219971	4.97798862755144	6.42484302007014e-07	8.89329487365273e-05	hervdb4
141105801-MALR0819uL	1.54154801474209	4.01426574920692	0.970020591642727	4.13833044761325	3.49842262876094e-05	0.00286664137103335	hervdb4
020951602-MALR1024cL	2.38580837503878	4.01985760816245	0.836551136754562	4.80527421641869	1.54539548707753e-06	0.000191080296352547	hervdb4
013053602-HERV0557cL	5.53030761015598	4.03131777903653	0.759490638991555	5.307922931597	1.10881503246124e-07	1.9522120373653e-05	hervdb4
080440601-MALR1008cL	2.04266748352005	4.03255550176658	0.941863128085578	4.28146657568293	1.85665613960212e-05	0.00167567441759357	hervdb4
011788502-HERV0898cL	2.35202462803834	4.03554695318236	0.956056045130285	4.22103596722974	2.43182127447383e-05	0.00209923039469629	hervdb4
150503202-HERV0500uL	3.16466145882797	4.03885521159919	0.865795830139759	4.66490490136368	3.08759797820142e-06	0.000348328429907495	hervdb4
100445002-HERV0810uL	2.07724970656834	4.05635277150244	0.864586197828541	4.69166958909385	2.70984513024743e-06	0.000310558275131593	hervdb4
170097502-HERV0741cL	1.99800206097862	4.05680558261379	1.03213607635456	3.93049489844611	8.47711923337707e-05	0.00615553445567381	hervdb4
071802001-MALR0819cL	1.75870761363112	4.06180048862532	0.918325977412993	4.42304866521121	9.73178095580427e-06	0.000955879600136767	hervdb4
021012903ERVF3LU3p	21.7709740363326	4.06584256623069	0.467282778116284	8.70103234409999	3.28878506240909e-18	1.13088271044396e-14	hervdb4
180383806-HERV0539cL	3.67822724678599	4.07310772705971	0.799643431268436	5.09365495643319	3.51225730385839e-07	5.27824696139927e-05	hervdb4
170767801-MALR1006cL	1.95464588522232	4.07514384166516	0.941402572556267	4.32880040958417	1.49923726213721e-05	0.00139294595637712	hervdb4
160174202-MALR1008cL	2.817216458559	4.07946926773468	0.975459671030102	4.18209936185951	2.88829684129854e-05	0.00243571511510916	hervdb4
170687501-MALR1126cL	3.15991881576161	4.08179276232122	0.816220023837797	5.00084859855431	5.70785233514144e-07	8.04524336856532e-05	hervdb4
220291801-MALR1003uL	2.25717992331162	4.08507387879868	0.90754941826767	4.50121370425896	6.75665295084412e-06	0.000696788620208596	hervdb4
121214601-HERV0584uL	1.75485258450504	4.09087690971371	0.926679263728381	4.41455535894325	1.01217813038317e-05	0.000989983243533169	hervdb4
042653202-HERV0415uL	1.49409444433347	4.09132554908865	0.996725233070824	4.10476770662626	4.04721352100241e-05	0.00324431516760974	hervdb4
070632202-HERV1036cL	1.54931229017307	4.09679554383419	0.974529556802431	4.20386997524873	2.62389703708284e-05	0.00224214680609046	hervdb4
130327301-HERV0817uI	3.44868977419382	4.11548073161926	0.855932510781513	4.80818368245132	1.52307790112258e-06	0.000188898675213566	hervdb4
060559402-MALR1014cL	2.60593857211148	4.12750114149418	0.904431986068004	4.56363906305259	5.02744820210794e-06	0.000537138262036792	hervdb4
120003403-HERV0116cL	3.60464855037327	4.1464057695618	0.811887049779257	5.10712145327255	3.27103516119506e-07	4.96767886931251e-05	hervdb4
141258401-HERV0740uL	2.30909403178021	4.15033138817948	1.04561918655693	3.96925710769128	7.20970564366091e-05	0.00534140062438773	hervdb4
110956401-HERV0741cL	3.15904583537439	4.15474141364416	0.877424155809934	4.73515731944831	2.1888524701457e-06	0.000258799176896069	hervdb4
011686402-MALR1023uL	7.16152545676106	4.16255711689338	0.638188310319354	6.5224590447456	6.9163952162335e-11	3.03046397466837e-08	hervdb4
040525001-MALR1127uL	1.23567580946039	4.16762874178777	1.04855426565809	3.97464287570476	7.04849392495979e-05	0.0052477330226122	hervdb4
012383401-MALR1044uL	3.80084957865196	4.16845395772236	0.842007352651702	4.95061467645717	7.39794492893066e-07	0.000100439548092235	hervdb4
022524501-MALR1018uL	1.95029454870884	4.18856178646172	0.840868819144726	4.98123094958146	6.31810817796895e-07	8.77706124867409e-05	hervdb4
010405402-MALR1127cL	1.95982762972964	4.19512489231591	0.941350704874967	4.45649519418283	8.33104677506339e-06	0.000837497060220886	hervdb4
0X1486201-MALR1026uL	3.61421579919756	4.21077859293408	0.842672746783769	4.99693221242216	5.82495327652649e-07	8.18039371113e-05	hervdb4
140660902-MALR1126uL	4.10788188947067	4.21086408419452	0.77412455352797	5.43951753629834	5.34250506930665e-08	1.02202652103131e-05	hervdb4
160263301-HERV0907uL	2.26069897063571	4.21850593366832	1.01476521901823	4.15712507150142	3.22277573734546e-05	0.0026710476149358	hervdb4
190241401-HERV0871uL	2.19342742174041	4.22794014444699	0.856256314228623	4.93770390266356	7.90477395668942e-07	0.000106446048057833	hervdb4
120433101-HERV0909cL	3.49125972464551	4.23716128065315	0.739943052514619	5.72633429863772	1.02623901796182e-08	2.40625313522373e-06	hervdb4
090142901ERVPenv	4.10166141905419	4.23740054794654	0.685226919979735	6.18393764808869	6.25220709277999e-10	2.03894889460483e-07	hervdb4
060278901-HERV0923cL	2.29106760885241	4.2436119738175	0.910751184344397	4.65946357991536	3.17034481472674e-06	0.000356851462084487	hervdb4
061681801MR41sLU3	4.17535910556472	4.25610107614077	0.855785930237276	4.97332443285288	6.5814378976286e-07	9.07386006847468e-05	hervdb4
061238401-MALR1045cL	3.77672061766387	4.25880038591801	0.736980541824068	5.77871482926435	7.52733857148602e-09	1.8460332375103e-06	hervdb4
161089601-MALR1004uL	7.55793541266129	4.26006718657468	0.632621171769376	6.73399401834704	1.65067966664702e-11	8.57513260359056e-09	hervdb4
051204901-HERV0521uL	1.39543961448651	4.26435146444912	1.09451672258079	3.89610444177966	9.77522489700409e-05	0.00695692892485307	hervdb4
020951601-MALR1024cL	3.04868916945945	4.28721720398287	0.763913738105796	5.6121745036468	1.9979979747218e-08	4.30916878302026e-06	hervdb4
060395901-MALR1017uL	4.2054604962054	4.28977447329751	0.758468562642714	5.65583688577778	1.55088704179982e-08	3.45435700414232e-06	hervdb4
012713401-HERV0801cL	1.83240042319617	4.30906572666596	0.974351500554153	4.4224961158424	9.7567103884146e-06	0.000957786036488722	hervdb4
012022304-HERV0198cI	9.56827273859325	4.31203744604067	0.602939493040454	7.15169182946746	8.57148289263135e-13	6.39672256645361e-10	hervdb4
0X1138104-HERV0184cI	2.22121983998477	4.3141416717722	1.13086752898265	3.81489569839651	0.000136240465303022	0.00916954349679106	hervdb4
130118901-MALR1004cL	3.10897501308674	4.32187827070529	0.88924302702568	4.86017673386882	1.17281005705739e-06	0.000150904169818338	hervdb4
021507601-HERV0421cL	1.77422117265211	4.32346638732456	0.828915726145413	5.21580934099218	1.83016350223101e-07	3.02430161211527e-05	hervdb4
041046502-HERV0517cL	5.65008074806829	4.32646098485729	0.744662646428733	5.80996106841965	6.248737186362e-09	1.56483323978878e-06	hervdb4
100374101-MALR1024uL	1.72266290621332	4.3368127079179	1.06175138336177	4.08458399572456	4.41558520518168e-05	0.00350479500892531	hervdb4
200146401-MALR1046uI	9.12033477351599	4.34471922412562	0.756009234261149	5.74691290427389	9.08875143292013e-09	2.17066656727594e-06	hervdb4
030256401-MALR1022uL	3.94502553369603	4.35352010764725	0.824785166448411	5.27836857977678	1.30339093740466e-07	2.2513823947146e-05	hervdb4
140671102-HERV0900cL	5.35270569276167	4.35696725861102	0.671823490287999	6.48528567636607	8.85638134959989e-11	3.76341886373558e-08	hervdb4
020354902-MALR0819uL	3.21907262975214	4.3631779428359	0.839268213223433	5.19878850895348	2.00591595482057e-07	3.25839857988155e-05	hervdb4
012842302-HERV0797cL	6.42008017041884	4.36545569993409	0.732150232538976	5.96251357429118	2.48387009870578e-09	6.98502918681425e-07	hervdb4
080090603-HERV0501uI	3.54370645986884	4.37679181433218	0.827902896985822	5.28660043377905	1.24610413673862e-07	2.16103477027004e-05	hervdb4
120029302-MALR1023uL	2.27395403655241	4.38632030133283	0.850610511679592	5.15667304965668	2.51376165555943e-07	3.94360564969364e-05	hervdb4
090481801-HERV0509uL	3.86545684752847	4.38774192732667	1.02971284968572	4.26113156562615	2.03394446344379e-05	0.00180516472558636	hervdb4
141306501-HERV0942uL	6.74354463421393	4.39313167605158	0.732175628367521	6.00010640322272	1.97188271569185e-09	5.70235616666156e-07	hervdb4
170685301-HERV0488cL	6.05496251710624	4.3948011749956	0.765356512506858	5.74216212076228	9.34752631820403e-09	2.2202454366483e-06	hervdb4
100373302-MALR1022cL	2.19096660864611	4.40212133906393	0.936582256772065	4.70019724080174	2.59910329335349e-06	0.00029974769852427	hervdb4
040823201-HERV0118uI	1.49037483123555	4.41023847674403	1.13394132242196	3.88930043339836	0.000100533600577253	0.00713147384961537	hervdb4
122002001-MALR1133cL	1.67129873724561	4.41079838931294	1.08184333154151	4.07711381187519	4.55981765472429e-05	0.0036003365700624	hervdb4
021417501-MALR1043cL	12.3464395139138	4.4185468705937	0.68688077608499	6.43277119470144	1.25298196315764e-10	5.02670290005737e-08	hervdb4
190510501-HERV0707cI	6.45366296122754	4.41989633158571	0.684009108235421	6.46175069654843	1.03498512835666e-10	4.29104586908396e-08	hervdb4
220336401-MALR1003cL	2.65689136368657	4.42221210284259	0.820459269624852	5.38992277442926	7.04879673697128e-08	1.30457250328735e-05	hervdb4
110996402-MALR1041cL	9.44088381681472	4.43140743916605	0.697224279412835	6.35578474533036	2.0736523757473e-10	7.75429792491193e-08	hervdb4
190143402-MALR1018uL	1.30065659342555	4.43446229568884	0.867987959116388	5.10889840016112	3.24042532032742e-07	4.9276616768625e-05	hervdb4
190200702-HERV0955uL	2.04072040264113	4.45013334722414	0.911613531436605	4.88160080315088	1.05228109174564e-06	0.000137330795207812	hervdb4
220267701-MALR1023uL	4.66975747569252	4.49587538985198	0.706446964234374	6.36406640196192	1.9648113125855e-10	7.41924724367159e-08	hervdb4
100410302-MALR1044cL	1.97185362787969	4.50974614143163	1.16077645631453	3.88511165685604	0.00010228286876153	0.00722896153108472	hervdb4
170392401-HERV0911cL	3.15047587341992	4.51557988490081	1.03056759390853	4.38164358319772	1.17787381015672e-05	0.00112602140385836	hervdb4
071404402-MALR1023uL	2.15499940666242	4.5187238281325	0.957961468162901	4.71702044216677	2.39323652488292e-06	0.000279253846289465	hervdb4
071378201-MALR1003uL	1.61094675905129	4.52152223491482	1.01480581051961	4.45555414449162	8.36767732684187e-06	0.000839962796054575	hervdb4
081521201-HERV0422uL	2.10554945985049	4.52420668150627	0.987148941477807	4.58310442468117	4.58123110216372e-06	0.000495874168716184	hervdb4
220337001-HERV0462uL	2.49714157744465	4.53185409390452	0.969749060866661	4.6732234933586	2.96508806547991e-06	0.000336476409575814	hervdb4
160407202-HERV0602cL	2.00417882480408	4.53628406125511	1.06125332016521	4.27445924084264	1.91601750623634e-05	0.00171763470683063	hervdb4
030210801-HERV0118uI	6.15252869725943	4.53919359811527	0.66972791611628	6.7776681976135	1.22130931988148e-11	6.50028773290292e-09	hervdb4
110108402-HERV0741cL	3.55238568519971	4.56268276176229	0.897208731422162	5.08541948151797	3.66814426767733e-07	5.47256845988558e-05	hervdb4
052171101-MALR1015uL	6.50037748537285	4.57376184415435	0.836419297029605	5.46826437457535	4.54463686545172e-08	8.88412889752696e-06	hervdb4
090763302-HERV0379uL	3.26519009292098	4.57736086885648	0.963999654462629	4.74830135847723	2.05132225473951e-06	0.000244202349516194	hervdb4
042695702-MALR1022uL	22.2703407810053	4.59390962139856	0.597458980657903	7.68907953536809	1.48197319427449e-14	1.90471976991531e-11	hervdb4
041510003ERV9pol	1.60496798393063	4.60138205254807	1.17787080802504	3.90652524979652	9.36328631355653e-05	0.00669947962171213	hervdb4
012526501-HERV1027uL	0.976982212733836	4.60474251999524	1.21349058311502	3.79462567247527	0.000147866371751942	0.00983753610532187	hervdb4
160491102-MALR1041cL	5.95575377274198	4.61032685937965	0.748309997086717	6.16098525654922	7.22937228473756e-10	2.31219978824851e-07	hervdb4
052295401-HERV1036cL	1.6445656358705	4.61466494026926	1.21475998161942	3.79882858350121	0.000145381595180727	0.00969825474041058	hervdb4
010287401-MALR1022uL	2.74113815246649	4.61823091518268	0.940004327628177	4.91298899318412	8.96983143438392e-07	0.000119306665556148	hervdb4
010552401-MALR1021uI	3.25910477045583	4.63575698846466	0.816376562026509	5.67845428702316	1.35917345056868e-08	3.07868147825729e-06	hervdb4
101061202-MALR1127cL	1.5383277499293	4.63930130867132	1.21987695199266	3.80308956661001	0.000142902660101507	0.00956670821109589	hervdb4
111508101-HERV0899uL	5.21179482767105	4.65719865495605	0.925110131772205	5.03420997674558	4.79823507172161e-07	6.93207133467458e-05	hervdb4
170086901-HERV0759cL	1.66657313854883	4.65835019109314	1.18889374643855	3.91822246945757	8.92043581311032e-05	0.0064263434416972	hervdb4
100244001-MALR1017uL	2.41787756403312	4.65835150669141	1.04348748852708	4.46421404943422	8.0363194800964e-06	0.000812340106607356	hervdb4
060168002-MALR1020uL	6.29553314165179	4.65921912069129	0.793950119276276	5.86840282225588	4.40013170546716e-09	1.14979947622832e-06	hervdb4
160684301-MALR0820cL	3.02373527256021	4.66041666416301	0.878078809261058	5.30751524237893	1.1112971534152e-07	1.95558995019342e-05	hervdb4
160389401-MALR1045cL	2.15247368626418	4.6725751403336	1.06955310280574	4.36871729704315	1.24978424595532e-05	0.00118756880895787	hervdb4
020405502-HERV0950uL	32.0880423465916	4.68819821952535	0.637120217760368	7.35842010477317	1.86099584996574e-13	1.72674540068212e-10	hervdb4
111317202-MALR1018uL	3.37757256927919	4.68872647311301	1.01729000624857	4.60903620827209	4.04539883429038e-06	0.000443549542962226	hervdb4
190228401-HERV0572uL	2.82727588607865	4.69010777962217	1.05438983677286	4.44817240839219	8.66040053214925e-06	0.000864346330936564	hervdb4
032893602-MALR1045cL	2.2533217540541	4.70422558902874	1.22864453561127	3.82879299315672	0.000128773262167541	0.00875184046952216	hervdb4
062077602-MALR1018uL	1.49054894368314	4.70439692076385	0.94813885975617	4.96171723409129	6.9872665681016e-07	9.57252761335419e-05	hervdb4
110041602-MALR1044cL	3.27426540104719	4.71619054484783	0.869006384298877	5.42710690054699	5.72748277140097e-08	1.08668729979856e-05	hervdb4
160917301-HERV0749uL	9.2051999877628	4.71982180740177	0.6793937740692	6.94710782987103	3.72850722031419e-12	2.31875730393088e-09	hervdb4
020950502-HERV0418cL	2.47150010923605	4.72020161018613	0.929781822311248	5.07667658897942	3.84093822004672e-07	5.70528115537534e-05	hervdb4
201042302-MALR1015uL	6.54692402084616	4.73715742934287	0.842263144199662	5.62431997881639	1.86240156488778e-08	4.04437165861926e-06	hervdb4
130168502-MALR1022uL	2.02336495309655	4.76448653631709	1.20472732073058	3.9548256724416	7.65904773509224e-05	0.00562983000430355	hervdb4
100122202-MALR1023uL	3.06358650491006	4.76476334706261	1.11924922686147	4.25710666821156	2.07089563225547e-05	0.00182953717491164	hervdb4
110063401-MALR1127uL	3.91791285955843	4.76552453928989	0.86770577610508	5.49209728749435	3.9718847946745e-08	7.89870178480198e-06	hervdb4
160169002-MALR1134cL	2.53246500967255	4.77128487428357	1.1273418971171	4.23233172339727	2.31280946809332e-05	0.00201201088397529	hervdb4
081817102-HERV0491uL	2.42475344469387	4.77495663857625	1.18173296108626	4.04063929484294	5.33056923544039e-05	0.00412168925152077	hervdb4
082076002-MALR0820cL	2.08319200286461	4.78103377709541	1.11889740295931	4.27298674967904	1.92871922331705e-05	0.00172679087945171	hervdb4
010405401-MALR1127cL	3.20578061829634	4.78353945023488	1.08021623221132	4.42831657921159	9.49714344423302e-06	0.000936810323484293	hervdb4
210442501-HERV1036uL	3.00913530566631	4.78554850389529	1.0014138511779	4.77879200319262	1.76351508942251e-06	0.000214201962314106	hervdb4
170205901-HERV0758uL	2.08743111961923	4.79289184613726	1.06266498622721	4.51025667379284	6.4749233404216e-06	0.000669725155765456	hervdb4
021417502-MALR1043cL	10.1566737272714	4.80867574110666	0.89558424473648	5.3693170345148	7.90353744175678e-08	1.44351871738865e-05	hervdb4
081467101-MALR1002uL	4.23743946384818	4.82780081495016	0.987477157931312	4.88902530673623	1.01336469286629e-06	0.000133052522027416	hervdb4
061259101-HERV0198cI	7.04049792558131	4.83227144827904	0.890957203712071	5.42368525462944	5.83826469989258e-08	1.1052889340735e-05	hervdb4
170647902-MALR1014cL	2.78672831941319	4.85515329973105	1.1711690925295	4.1455613290177	3.38982252363399e-05	0.00279017128119418	hervdb4
101036902-HERV0466cL	1.60240933971394	4.85798286170794	0.960061454364137	5.06007489377381	4.19091831579853e-07	6.16242573706952e-05	hervdb4
190048001-MALR1127cL	4.35292338990135	4.86214641678624	0.800900799436874	6.0708472512512	1.27237168635213e-09	3.81953652766363e-07	hervdb4
032966802-HERV0911uL	3.21097256588796	4.86425676406385	0.864269688859756	5.6281700339177	1.82131507523367e-08	3.96010499628816e-06	hervdb4
200866002-MALR1009cL	1.72120624871961	4.87145988487066	1.2391515671122	3.93128654650651	8.44924939061687e-05	0.0061397004654257	hervdb4
040961001-MALR1022uL	2.82138518071565	4.87398891751428	0.886138119434417	5.50025871883847	3.7923437765744e-08	7.59387846132053e-06	hervdb4
190054901-HERV0534uL	2.05396443938145	4.87517738063714	1.06382757857305	4.58267625208252	4.59062488936281e-06	0.000496428373046645	hervdb4
031930002-MALR1014uL	3.76677403533524	4.88239350041728	0.949844723496822	5.14020173996747	2.74443644190346e-07	4.25357004943876e-05	hervdb4
161042701-MALR1023cL	4.73583376213924	4.88969186354504	0.986841684180759	4.95488986929478	7.23712683276842e-07	9.86808547547072e-05	hervdb4
081250203-HERV0927uL	2.27235900272567	4.89703352957743	1.14541172522847	4.27534782621563	1.90839115116623e-05	0.00171212486369624	hervdb4
062258101-HERV0501uI	2.70423828685311	4.89803697285186	1.13235194497413	4.32554295030927	1.52156616882051e-05	0.00141067029629734	hervdb4
042695801-HERV0600uL	11.68166034873	4.89951667074804	0.718040853590409	6.82345112572504	8.88789881416957e-12	4.95068803610454e-09	hervdb4
140761801-HERV0417cL	2.21490965619266	4.92424474776936	0.950232554481296	5.18214696449477	2.19346271433335e-07	3.5044909352116e-05	hervdb4
090294401-MALR1127uL	2.04646392127349	4.93925737494165	1.12109035242084	4.40576209069679	1.05412609944449e-05	0.00102494491182187	hervdb4
042653201-HERV0415uL	3.3972344964861	4.94251792634236	1.05817748196637	4.67078350330974	3.00053050606551e-06	0.000340109869304337	hervdb4
030643602-MALR1002cL	4.96590609870643	4.94342432969057	0.766353191578204	6.45058229549515	1.11421208041795e-10	4.55894684699385e-08	hervdb4
070029302-HERV1030cL	14.2116355756723	4.94953150350737	0.601829171485348	8.22414688090252	1.96585065504786e-16	4.42980191113447e-13	hervdb4
012036302-MALR1041cL	2.44243174195532	4.95762819995107	1.16419009064373	4.25843531893471	2.058627655043e-05	0.00182148130763136	hervdb4
020798401-HERV0617cL	4.45229764643693	4.95931019317936	0.919423841994493	5.39393255500227	6.89321009691742e-08	1.27850441893762e-05	hervdb4
090082401-HERV0466uL	1.91700053140175	4.96263244189348	0.974569118375354	5.09212979184728	3.5406358282988e-07	5.31202527080091e-05	hervdb4
190032002-MALR1022uL	19.5239935219521	4.96358696036277	0.544045384426331	9.12347958910932	7.27502080802198e-20	3.94465268874967e-16	hervdb4
170015201-HERV0900uL	3.57852407075791	4.98043378843928	0.987362220911439	5.04418103403006	4.55467921628577e-07	6.63266798839902e-05	hervdb4
150299902-HERV0761cL	1.96412952364496	4.98737733332689	1.2401351337646	4.02164022092257	5.77942869229668e-05	0.00441659842501826	hervdb4
052679102-HERV0116cL	3.02469238130802	5.00815186966316	1.08023869800184	4.63615299000761	3.54953293217652e-06	0.000395428224116821	hervdb4
170611101-MALR1002uL	2.2070818063444	5.01380274985556	1.08683178807722	4.61322792069396	3.96463139344567e-06	0.000435933582431406	hervdb4
140464801-MALR1018cL	1.76708005590824	5.01598849285506	1.25359794619393	4.00127370029937	6.30024315455955e-05	0.00474871932992019	hervdb4
052292801-HERV0863uL	1.98852871995359	5.02587701101453	1.19598018204754	4.20230793658316	2.64207389470961e-05	0.00225547966283427	hervdb4
0X0485601-HERV0746cL	6.06131450903058	5.03357233527297	0.980786335139054	5.13218032810309	2.86404897423881e-07	4.4172545557349e-05	hervdb4
131353202-HERV0496cL	5.90815812707131	5.04465065784744	0.79630539594157	6.3350702928272	2.37233092402409e-10	8.73007717131327e-08	hervdb4
042552102-HERV0415uL	1.89780828366302	5.06549301630325	1.29088261791883	3.92405393487277	8.70712284800835e-05	0.00629502123101581	hervdb4
091701801-HERV0492cL	2.41596656791996	5.06611605371113	1.16113957423369	4.36305519692116	1.28258566398361e-05	0.00121441439867829	hervdb4
042577303-HERV0886uL	6.75069143255218	5.06755932515623	0.986600174206231	5.13638600280335	2.80072107933931e-07	4.33499656089352e-05	hervdb4
141128501-HERV0590uL	7.90652249726619	5.07052599578624	0.823916525110487	6.15417441118357	7.54695949885591e-10	2.4005003531558e-07	hervdb4
111022802-HERV0490uL	1.99714080056811	5.0781341442297	1.06105617939008	4.7859239151208	1.7020253032149e-06	0.000207678207004795	hervdb4
200159702-HERV1029cL	4.06531800201709	5.0856924268702	1.14610877895644	4.43735579052177	9.10706950731301e-06	0.000902437253120435	hervdb4
041308501-MALR0819uL	2.68210903815413	5.08878658931449	0.994897262385733	5.11488651311768	3.13929642121546e-07	4.7991129695603e-05	hervdb4
012024102-MALR0819uL	11.1470969250973	5.09098757960038	0.592844402321306	8.58739250917511	8.89652900015256e-18	2.59434747364113e-14	hervdb4
060510905-MALR1016cL	2.19756850029853	5.09668864882053	1.29646126341036	3.93123095356788	8.45120370092075e-05	0.0061397004654257	hervdb4
160500801-HERV0813uL	17.05689651063	5.10033115557314	0.671468428164975	7.59578699703215	3.05927391954596e-14	3.57080541134838e-11	hervdb4
210465202-MALR1046cL	25.7406442678529	5.1005145123094	0.56672997999796	8.99990240912923	2.25918411740984e-19	1.13620590206313e-15	hervdb4
190191301-HERV1034cL	7.37590447711623	5.10704921499884	0.866387268950728	5.8946494229814	3.75477693212343e-09	9.99219855050208e-07	hervdb4
220236901-MALR1127uL	2.32527405543655	5.11154501679494	1.18290273713233	4.32118791878586	1.55191432007882e-05	0.00143535529678506	hervdb4
081906202-MALR1020uL	3.46027963026529	5.13474247919655	0.874052060615234	5.87464146653035	4.23759472979251e-09	1.10899707626893e-06	hervdb4
220140001-HERV0972cL	4.47758390372936	5.13720746651294	0.821497650250716	6.2534658071695	4.01442487908082e-10	1.38477705918352e-07	hervdb4
121317201-HERV0611uL	2.13991395362354	5.13833733022163	1.04420056553259	4.92083369788334	8.61763330752325e-07	0.000115107433039904	hervdb4
030087601-MALR0818uL	2.79348677195304	5.14758351796612	0.959917492617048	5.36252704795714	8.20656751936931e-08	1.49023708036187e-05	hervdb4
180147702-HERV0741cL	2.7268297261218	5.1516284720741	1.25255625956889	4.11289188227538	3.90733408016916e-05	0.00314672330587213	hervdb4
071802002-MALR0819cL	2.70102058237129	5.16282825434841	1.16969600704311	4.4138205339348	1.01562161532519e-05	0.000992707879320439	hervdb4
150676301-MALR1003cL	1.83785262183251	5.16388947941047	1.24517272130411	4.14712705398987	3.36673252309265e-05	0.00277511524979481	hervdb4
011789102-MALR1130uL	3.79332079762573	5.17019220596351	0.944552177874323	5.47369677088547	4.40742981551041e-08	8.63924669860341e-06	hervdb4
060542601-HERV0462uL	2.5376131917837	5.173292389388	1.29094766281085	4.00736028145704	6.14011626260011e-05	0.00464720424306977	hervdb4
101045002-HERV0750cL	5.53732048384013	5.18325794840966	0.900284897703211	5.7573529908511	8.5443121895309e-09	2.05351744839286e-06	hervdb4
041009701-MALR1132cI	11.6440389188543	5.19361547289122	0.70003568734979	7.41907243694006	1.17943397860756e-13	1.16274766834203e-10	hervdb4
041770202-HERV1036cL	2.43494896435962	5.20358976463152	1.2715416591378	4.09234705543187	4.27028892837092e-05	0.00339957711384096	hervdb4
121294001-MALR0818uL	2.03070085976683	5.20601138069524	1.15605090123075	4.50327176351218	6.69152256365362e-06	0.000690482355051763	hervdb4
081521202-HERV0422uL	3.22558701777913	5.22164073499294	1.23415240137869	4.23095294321816	2.32703354681355e-05	0.00202286368089989	hervdb4
020146202-HERV0415cL	12.0096925763641	5.22898225930752	0.78155097130423	6.69051981418632	2.22379245177137e-11	1.11036036922835e-08	hervdb4
140798201-MALR1134uL	2.22393916361828	5.23878602489511	1.33031851563777	3.93799376864538	8.21657278075076e-05	0.00599141644542158	hervdb4
011693902-HERV0400cL	8.05907417072291	5.23930891238435	0.809746240317963	6.47030964951074	9.78022870626336e-11	4.09895527252115e-08	hervdb4
012036002-MALR1004cL	7.26184658764153	5.25589672080247	0.885433221651181	5.93596060355758	2.92129948960994e-09	8.03924939638732e-07	hervdb4
023470701-HERV0422uL	2.38175604245809	5.25903336792138	1.35254520443133	3.88824961316729	0.0001009697588969	0.00715802364298312	hervdb4
100874801ERVFsLU3p	3.85897342349719	5.25916751691444	1.09435590138732	4.80571951980831	1.54195944634591e-06	0.0001908828261317	hervdb4
170313201-MALR1003cL	2.50274507585785	5.28533791164281	1.16211392563522	4.54803767087966	5.41484446029436e-06	0.000572186152439509	hervdb4
160390201-MALR1014cL	4.27453087472746	5.29183136944384	1.04424889392997	5.0675958578499	4.02871633540516e-07	5.96050454763343e-05	hervdb4
170249702-HERV1036cL	2.23532635820986	5.29970008457645	1.35757399865342	3.90380199520116	9.46932614203717e-05	0.00676537528070839	hervdb4
220014502-MALR1126cL	10.13541967492	5.30764182420401	0.750109154066444	7.07582595870289	1.48561218277971e-12	1.03314056045734e-09	hervdb4
012088401-MALR1023cL	3.6435287097273	5.3122115890768	1.11192371269025	4.77749644912611	1.77491183755663e-06	0.000215510813809973	hervdb4
020893902-MALR0819uL	3.24313725114614	5.3196953778707	1.26297372458709	4.21203962862324	2.53075130793279e-05	0.00217166498239079	hervdb4
022591601-HERV0602uL	2.00633779871606	5.35191891437657	1.09601857583913	4.88305493388106	1.04454755111522e-06	0.000136523608616716	hervdb4
150315601-MALR1127cL	2.22243612571239	5.36459191179518	1.1326937511698	4.7361362294573	2.17831192448117e-06	0.000257816440666254	hervdb4
150406802-MALR0818uL	2.60686683905288	5.38390094683847	1.13771845842539	4.73219090977024	2.22109363674094e-06	0.000261986374514562	hervdb4
020664902-MALR1019cL	3.24474320710807	5.40708499320914	0.684506390881903	7.89924691023377	2.80593558889244e-15	4.42598076389751e-12	hervdb4
190103501-HERV0955uL	3.29542078574018	5.41831717839018	1.18593836365729	4.56880167168278	4.90520664933291e-06	0.000526183867527514	hervdb4
071052301-HERV1038cL	4.67900934883527	5.42277023880672	0.951931722546032	5.69659578557064	1.22223237113457e-08	2.80886806245773e-06	hervdb4
101433601-MALR1012uL	2.64668520800571	5.42656002538804	1.40323931081058	3.86716647943207	0.000110107264163925	0.00768183007844094	hervdb4
020146201-HERV0415cL	8.87517976582348	5.47813358868618	0.848888921276854	6.45329848391267	1.09441500440649e-10	4.49463833449044e-08	hervdb4
060560401-MALR0820uL	2.2534547495094	5.51096910219351	1.37470542018605	4.00883638143193	6.1018674383864e-05	0.00462430670117678	hervdb4
160386402-MALR1026uL	3.91963642504151	5.51217727854933	1.2155426053824	4.53474625582149	5.76727780526112e-06	0.000604458092413686	hervdb4
140164501-MALR1014uL	5.02321679207065	5.51355764117235	1.13555008917649	4.85540681448128	1.20139841507442e-06	0.000153727609881684	hervdb4
041770201-HERV1036cL	4.95560092867543	5.53162467932308	1.06404146612401	5.1986927722593	2.00694919385255e-07	3.25839857988155e-05	hervdb4
021295702-HERV0739uL	2.35633740345903	5.53264877449479	1.29431279742759	4.27458399970297	1.91494500442546e-05	0.00171711683575122	hervdb4
012303202-HERV0869uL	2.19112378644924	5.5507790822228	1.14701353518087	4.83933180557236	1.30276389757609e-06	0.000164994572166736	hervdb4
072097106-HERV0468cL	3.74979619741315	5.55472871317733	1.06580704892405	5.2117582809993	1.87059179928967e-07	3.07645860753317e-05	hervdb4
020904801-HERV0760cL	3.74081524814869	5.55935167002562	1.13968584013236	4.8779685368206	1.07184016570486e-06	0.000139568470657748	hervdb4
140796102-HERV0933uL	10.6996007408564	5.56609235860986	0.778022790565499	7.1541507859483	8.41924826364233e-13	6.3167394173655e-10	hervdb4
140770602-HERV0548cL	2.15196822746569	5.59423465433925	1.4048825590572	3.98199452208551	6.83393552714723e-05	0.00511211965214622	hervdb4
012040102-MALR1024uL	4.25212086526692	5.60621114817315	0.963124144301265	5.82086035465385	5.85454705627954e-09	1.47220646338415e-06	hervdb4
161089602-MALR1004uL	5.43905511459484	5.61115631390544	1.05180298863877	5.33479784191078	9.5651062802697e-08	1.70481930219784e-05	hervdb4
170088601-MALR1127cL	2.50565119260879	5.61148298726894	1.19973233931475	4.67727909249663	2.90706476841795e-06	0.000330432235812774	hervdb4
190194102-MALR1004uL	2.8763514218445	5.61615994901302	1.05349495197116	5.33097945889993	9.76844688310673e-08	1.73660165849165e-05	hervdb4
150654601-HERV0750cL	5.26091422232659	5.61970737544162	0.943310359498602	5.95743205706833	2.56232182836256e-09	7.19981312452126e-07	hervdb4
060169702-MALR1046cL	3.03009092637492	5.62836217705188	1.37399888245107	4.09633679396555	4.19739157250093e-05	0.00334845706549258	hervdb4
170615001-HERV0923cL	3.02926473505836	5.63156694731427	1.40094213097996	4.01984266357595	5.82370209007965e-05	0.00444358201253175	hervdb4
140688601-MALR0819uL	6.48461642448704	5.64201312045489	1.07498595898748	5.24845285027636	1.5338188460083e-07	2.59515268621062e-05	hervdb4
011269601-HERV0572cL	5.6351212092774	5.64894798915731	0.891571413540938	6.33594561620378	2.35889988439826e-10	8.68986664420261e-08	hervdb4
023470301-MALR1026cL	7.00421415900478	5.66790662186391	1.09361887503259	5.18270738669813	2.18687988872608e-07	3.49718351702422e-05	hervdb4
101770302-HERV0549cL	3.96521699908854	5.66834370866584	0.918689697028206	6.1700307807978	6.8276699818857e-10	2.19994246714389e-07	hervdb4
130118902-MALR1004cL	3.52954694158451	5.68944877923	1.27112047643954	4.47593197079663	7.60787084795549e-06	0.000774899718713682	hervdb4
041873802-MALR0819uL	2.41675698274749	5.69940001059292	1.14508166836471	4.97728692027027	6.44817038056194e-07	8.91846985038902e-05	hervdb4
121422002-MALR1022uL	3.05277828413405	5.73272240383811	1.16663036862741	4.91391494512775	8.92754919792263e-07	0.000118789805316837	hervdb4
090792601-MALR1041uL	3.20720200376595	5.73715436873002	1.48433944943593	3.86512288069297	0.000111033284902411	0.00773554919229763	hervdb4
052493402-MALR1004cL	2.62388989065232	5.75780751288649	1.4215990358812	4.0502331301297	5.11666322836809e-05	0.00398557807753157	hervdb4
170686601-MALR1005cL	3.38393048069988	5.75878772099897	1.2500763352157	4.6067488510654	4.09013507496404e-06	0.000447464903440738	hervdb4
121260702-HERV0537cL	3.90665282681016	5.76343359093063	1.08494058819058	5.3122112433296	1.08302954014075e-07	1.90875018293369e-05	hervdb4
220108002-MALR1131uL	14.3003964977291	5.80576477592989	0.800274120699445	7.25472013371571	4.02493180127784e-13	3.40666300897424e-10	hervdb4
082074602-HERV0513uL	14.8109457091406	5.83787349534672	0.715473724495866	8.15945197632545	3.36548053219139e-16	7.12127472122594e-13	hervdb4
141231202-MALR1004uL	4.51617144422787	5.8547088926724	1.09154710701881	5.36367954715442	8.15435171383497e-08	1.48153043546336e-05	hervdb4
041011501-MALR0819cL	4.37311708606152	5.85761897854484	1.26587871865583	4.62731452248815	3.70437729272961e-06	0.000410299892830661	hervdb4
010561602-HERV0419cL	1.99089447432613	5.86672864088975	1.25772322758695	4.66456253029975	3.09274279025675e-06	0.000348682132253053	hervdb4
110041002-MALR1022uL	9.39968197780772	5.86738085421039	0.869115312301158	6.75098087810157	1.46848954631909e-11	7.69781332875607e-09	hervdb4
150923401-HERV0740uL	4.46507061752617	5.86951035564903	1.03822752739017	5.65339504183964	1.57309186893726e-08	3.49484212777598e-06	hervdb4
023413702-MALR1127uL	4.86798297574822	5.87154705982398	1.08754407075965	5.39890494343157	6.70488852377815e-08	1.24891595036044e-05	hervdb4
030253702-MALR1014uL	5.10944152326283	5.87180767015713	1.11962182806049	5.24445622887579	1.56743910018807e-07	2.64173247473174e-05	hervdb4
021601501-HERV0739uL	9.00735404183759	5.87554662001518	0.944820218051736	6.21869272879325	5.01313922483932e-10	1.68083050609057e-07	hervdb4
052681501-HERV0378uL	4.51165308141784	5.88269107036181	1.17531306740434	5.00521200138924	5.58005834823616e-07	7.88754316906277e-05	hervdb4
060559502-MALR1002cL	5.11664888886939	5.90293860419254	1.20018798597627	4.91834502025189	8.72789781058856e-07	0.000116490580701171	hervdb4
190435201-MALR1023uL	2.90106214456871	5.91155300377613	1.45287842659746	4.06885593147705	4.72445472349328e-05	0.00371848554807584	hervdb4
020562002-HERV0911uL	1.99649628504461	5.92732972762062	1.5330688801588	3.86631664391143	0.000110491463691011	0.00770553611938399	hervdb4
070518401-HERV0588uL	7.12578400689836	5.93559898832337	0.916469545448895	6.47659163122116	9.38176523697388e-11	3.96065714420277e-08	hervdb4
140675702-HERV0462uL	3.05442774281027	5.94625543967359	1.30876137611909	4.5434221609643	5.53482490606687e-06	0.000582205195181366	hervdb4
120006501-HERV0863uL	6.06244154712609	5.9911706475962	1.17180827027657	5.11275675344241	3.17491019076201e-07	4.84219801318276e-05	hervdb4
120910001-MALR1046cL	13.1810809708953	5.99359104800451	0.910889756741359	6.57993023156407	4.70669071863682e-11	2.14345907241647e-08	hervdb4
210609801-MALR1017cL	5.70386048548524	6.00824734545266	1.00306187271103	5.98990701262909	2.09961048348449e-09	6.04652970936754e-07	hervdb4
170476102-MALR1026cL	3.15569153757372	6.01223683450963	1.39545545942874	4.30844051229758	1.64409682606466e-05	0.00150735661976475	hervdb4
021312802-HERV0739uL	3.13499409368867	6.01739107644201	1.55486321902026	3.87004528940729	0.000108815136760119	0.00760983946167434	hervdb4
160684302-MALR0820cL	11.7743906107654	6.02034537678005	0.870819481745988	6.91342523103559	4.73089079840654e-12	2.83500877903196e-09	hervdb4
220110801-HERV0426uL	8.15719198310757	6.03514293816752	0.92476698965942	6.52612280244798	6.74939899152912e-11	2.96853794428446e-08	hervdb4
012561202MR41sLU3	6.89706004003958	6.03803968030826	0.983812115847492	6.13739105571684	8.38877093883485e-10	2.64642844654043e-07	hervdb4
042921802-MALR1042cL	2.66352251746275	6.03985400072421	1.3991711794551	4.31673700074097	1.58352644341521e-05	0.00146108839775045	hervdb4
180147701-HERV0741cL	4.04592561588723	6.04095559094245	1.19187306729025	5.06845548970805	4.01056740024697e-07	5.94255806675365e-05	hervdb4
070526402-HERV0925uL	17.5928367948682	6.04143556262663	0.852664675813064	7.08535926724745	1.38684041880393e-12	9.78173500271016e-10	hervdb4
060497901-MALR1024uL	54.2039284745399	6.05945268189266	0.742748225466756	8.15815167795897	3.40190150838936e-16	7.15471431176532e-13	hervdb4
023424601-MALR1018uL	2.92409860748179	6.06595176325712	1.54487317227753	3.92650469443676	8.61892109205274e-05	0.00624542337392801	hervdb4
030726502-MALR1007cL	4.26465216596439	6.07751728358334	1.12891211157756	5.383516769158	7.3044438988588e-08	1.34542893937472e-05	hervdb4
210491902-MALR1003cL	3.40096860416281	6.08228846952996	1.32114269666877	4.60380887308109	4.14833196267702e-06	0.000452974876553864	hervdb4
010333501-HERV0912cL	2.68740239081747	6.08232965634836	1.45377544214831	4.18381648224862	2.86655548328968e-05	0.00241973262907123	hervdb4
160169601-HERV0468uI	20.3018771881869	6.08290014581515	0.806181963231606	7.54531907589653	4.51181475130727e-14	4.96153830041286e-11	hervdb4
100442501-MALR0820uL	2.68455446061076	6.09084514408974	1.41556515476579	4.30276566471253	1.68679227675456e-05	0.0015408019370344	hervdb4
160030201-HERV0902cL	2.85361376251395	6.106343464703	1.16815145744519	5.22735594411524	1.71951275224774e-07	2.86174367956208e-05	hervdb4
121745502-MALR1001cL	8.03282931375991	6.12036130990506	1.04843155434314	5.8376355466901	5.29468162924572e-09	1.35100030807416e-06	hervdb4
071527502ERVLsLR	3.39983388223143	6.13743864087074	1.37740964063834	4.45578313073694	8.35874984469181e-06	0.000839552350536889	hervdb4
042577301-HERV0886uL	9.04183634951909	6.14673273284183	1.09163431314849	5.63076174759793	1.79415429083895e-08	3.9133087492579e-06	hervdb4
061523002-MALR1041uL	3.53614017108054	6.19081129383275	1.38617585923585	4.46610814391582	7.96553561329063e-06	0.000805889261960384	hervdb4
120427401-HERV0954uL	4.35841799815802	6.19643022452546	1.40218362068046	4.41912894512233	9.90995096668384e-06	0.000970906602049301	hervdb4
032667002-MALR1026uL	4.51013576846144	6.20940020452731	1.22192537792429	5.08165254336183	3.74165359514789e-07	5.57026439548786e-05	hervdb4
031889901-MALR1134cL	6.14999598486631	6.21535865018841	1.04017578686915	5.97529641494171	2.29672195594868e-09	6.52216410109091e-07	hervdb4
170087202-HERV0541cL	10.7261411241493	6.22028662276402	1.00389074935306	6.1961788439355	5.78503907016863e-10	1.90369150321392e-07	hervdb4
071937601-HERV0519uL	5.71952841912355	6.22483855582381	1.09292735392887	5.69556479069414	1.22964177284454e-08	2.82029271654008e-06	hervdb4
071036302-MALR1017cL	4.57895157979699	6.26249827973638	1.38807533613678	4.51164149142353	6.43278498442121e-06	0.00066612031029726	hervdb4
010630002-MALR0820cL	4.66697340286103	6.29420738121977	1.25944791324483	4.99759244906239	5.80505103489502e-07	8.15960392318398e-05	hervdb4
141292502-MALR1045cL	3.89441776717154	6.29726761129427	1.22231815082604	5.15190550597534	2.57852959715407e-07	4.04155980489795e-05	hervdb4
023182902-HERV0794cL	9.46575717220101	6.32407015431466	0.866031684725799	7.30235425083433	2.82775557584556e-13	2.45936776924793e-10	hervdb4
030223502-MALR1022uL	13.3694836978843	6.32436064090748	0.984868679543312	6.42152682105813	1.34914236172121e-10	5.36902961427172e-08	hervdb4
031919301-HERV0421uL	4.08136859956153	6.40143715884169	1.49749082564277	4.27477554401309	1.91329948770599e-05	0.00171608474599052	hervdb4
060259501HK01gag	3.45551640483926	6.43054758009651	1.36474261966996	4.71191233234267	2.45402954990506e-06	0.000285101216741899	hervdb4
120006502-HERV0863uL	8.19237871977828	6.45236164081664	1.11849510918034	5.76878842639292	7.98434683476522e-09	1.9430070396916e-06	hervdb4
101434701-MALR1022uL	6.70877719502311	6.46420265887773	1.04302930611976	6.19752735704579	5.73570717551116e-10	1.8938202702625e-07	hervdb4
071898802-MALR1042uL	3.53816035508596	6.4826772926306	1.50780740205142	4.29940673046883	1.71255928268251e-05	0.00156269345852349	hervdb4
091702001-MALR1023uL	11.682635241157	6.49717311465297	1.02994087237554	6.30829719347609	2.82122095215771e-10	1.01716392728516e-07	hervdb4
031061601-MALR1131uL	8.24616585699786	6.53512823635173	1.16526825142642	5.60826078317332	2.04369925382781e-08	4.39680418514151e-06	hervdb4
042653901-MALR1001cL	12.3958828164217	6.54560767513178	0.956902966486574	6.84040901154801	7.89673907158386e-12	4.49233834855906e-09	hervdb4
170010902-HERV0415uL	3.62952846815949	6.55156838528873	1.49904234124483	4.37050255688456	1.23960902921616e-05	0.00117828091627277	hervdb4
012036301-MALR1041cL	8.6730658684855	6.64896581495773	1.26481204812417	5.25688051819141	1.46519435838487e-07	2.49976276424148e-05	hervdb4
070259402-MALR1127uL	6.06734084989557	6.65203036129656	1.1553999965093	5.75733977963797	8.54498067972822e-09	2.05351744839286e-06	hervdb4
030852901-MALR1002cL	6.7803173865754	6.68385990254957	1.51131580464763	4.42254350943412	9.75456973695058e-06	0.000957786036488722	hervdb4
070527101-HERV1034cL	5.49533827465713	6.81670679257399	1.25215122012252	5.44399644629744	5.20982596752176e-08	1.00216951621364e-05	hervdb4
120641201-MALR1015cL	8.50430307412583	6.83783894056068	0.96544277211856	7.08259374665552	1.41480986640279e-12	9.93860971334202e-10	hervdb4
190198302-HERV0926uL	7.53900430901377	6.84212370599094	1.35994064791879	5.03119288070542	4.87437451833549e-07	7.01287498073293e-05	hervdb4
010333502-HERV0912cL	5.56704730365169	6.86713788704425	1.49097671386395	4.60579821481427	4.10886679332351e-06	0.000449230924580695	hervdb4
061878302-HERV1032uL	4.17754132049726	6.91032257374167	1.7063417217358	4.04978820227876	5.12640085970159e-05	0.0039913924755074	hervdb4
041011502-MALR0819cL	5.85647683263111	6.96349936523006	1.72571695071728	4.03513412923002	5.4571114219477e-05	0.00420267821936149	hervdb4
111646101-MALR1026uL	11.7489664433657	7.0323389336063	1.21826369514383	5.77242756362043	7.81375383185759e-09	1.90684166999383e-06	hervdb4
032018201-HERV0498uL	8.73425174219516	7.05935204052349	1.36804881781946	5.16016091573062	2.46737673100481e-07	3.88136479235399e-05	hervdb4
100417502-MALR1043uL	5.1813408236695	7.06954128110206	1.66784317854729	4.23873261709157	2.24785189933432e-05	0.0019633767080468	hervdb4
012038701-MALR0818uL	6.55686358861841	7.11813842767162	1.65193737517124	4.30896384733336	1.64021174573932e-05	0.00150422383396004	hervdb4
120249102-HERV0531uL	5.88643018994526	7.12525101560866	1.8513418524377	3.84869547794574	0.000118748517014307	0.0081786039240104	hervdb4
090494302-MALR1026uL	8.31690793435732	7.12626645917033	1.17181990593739	6.08136661876361	1.1916247169567e-09	3.61466441676849e-07	hervdb4
190226502MR413LRp	17.0404654183763	7.15423999216152	0.890295356173831	8.03580513202705	9.29663962767926e-16	1.73447305569745e-12	hervdb4
011681501-HERV0403uL	5.49099917779107	7.17123086961875	1.85666163310159	3.86243284277872	0.000112263431972784	0.00780558127894117	hervdb4
120134301-HERV0558uL	14.1142715730615	7.23221798090045	1.08527151879551	6.66397104839454	2.66525991168488e-11	1.29537604279116e-08	hervdb4
022906701MR525LU3	81.1328136301286	7.25597619224883	0.668174585901821	10.8594016374562	1.79924260854067e-27	2.40143526929148e-23	hervdb4
011943501-MALR0818uL	13.7363269052372	7.27465320065911	1.01354921029301	7.17740503054222	7.10469762837923e-13	5.51559769798694e-10	hervdb4
150883901PBLAsLU5p	9.70890391520846	7.34487782210791	1.10255900365599	6.6616641810125	2.70744114867802e-11	1.3122014349361e-08	hervdb4
030084701-MALR1018cL	7.98563010062579	7.42191337179026	1.86412693950189	3.98144204373414	6.84984242797834e-05	0.00512291448137294	hervdb4
160951202-MALR1004cL	8.15038913028969	7.43362166136888	1.52181462116845	4.88470905586473	1.03581689533308e-06	0.000135579057077793	hervdb4
220364301-MALR1133cL	15.563411218334	7.56140607510118	1.1368177037465	6.65137959250789	2.90358341277294e-11	1.38979519434547e-08	hervdb4
080740202-MALR0819uL	48.3240622033625	7.66068833500451	0.912428112324066	8.39593632805964	4.62196069877633e-17	1.18808355680693e-13	hervdb4
150070202-HERV0517cL	28.3413462368576	7.73280631996445	0.976088271204171	7.92224079326833	2.33268013193362e-15	3.80040685156622e-12	hervdb4
030528101ERVPsLU5	10.1256215823974	7.74086340887236	1.27171083074475	6.08696821771904	1.15068801286615e-09	3.52059041353169e-07	hervdb4
052704001-HERV0479cL	12.2742356973326	7.88797940664834	1.61540096638825	4.88298544496013	1.04491586792115e-06	0.000136523608616716	hervdb4
042614002-HERV0750cL	12.9936850057451	8.12412929293553	1.96281435983711	4.13902071391497	3.48791460808162e-05	0.00285938135435031	hervdb4
160386401-MALR1026uL	103.623359055217	9.03760375803314	1.27688925737058	7.07782895491164	1.46430298702275e-12	1.02241936128095e-09	hervdb4
130879501-MALR1004uL	19.7491013622085	9.65825936362262	1.75447006230166	5.50494395495818	3.69285729735245e-08	7.40748751056212e-06	hervdb4

## Sheet: res_vargiu_4th
ID	baseMean	log2FoldChange	lfcSE	stat	pvalue	padj	source
1058	16.3203485223463	3.24594436783045	0.495782479363871	6.54711391172044	5.86596212185404e-11	2.6164603798532e-08	vargiu
1278	13.4368767899724	2.87578883024734	0.476987481218121	6.02906563271474	1.64910311375291e-09	4.85799458857838e-07	vargiu
1350	15.3906742653834	-1.21483750286408	0.31039184554754	-3.91388343569746	9.08234922238926e-05	0.00652943200156105	vargiu
1405	19.584063825783	1.32088580978743	0.312712011826058	4.22396889097487	2.40037197988894e-05	0.0020782861388749	vargiu
1538	1.93199824709123	-1.69365425360447	0.442944239358535	-3.82362858146027	0.000131501963473563	0.00889547979816682	vargiu
1638	29.448037014418	1.28686216653335	0.282179611096806	4.56043638848119	5.10474247250915e-06	0.000544056428995738	vargiu
1874	6.36751345818604	4.50018711201804	0.836834186251942	5.37763297191972	7.54714704654822e-08	1.38425526854818e-05	vargiu
1889	8.85896622804917	1.1699125626904	0.236320353737959	4.95053660924884	7.40091331836683e-07	0.000100440552981606	vargiu
1892	48.6113938544019	1.51645434623345	0.262577559675921	5.77526254758821	7.68331841263727e-09	1.88162678585278e-06	vargiu
2371	10.6304181436056	4.04148949813252	0.545396259817284	7.41018924384718	1.26119316278057e-13	1.22593627828603e-10	vargiu
2476	46.3085336000869	1.56384092136729	0.265591326706408	5.88814755647498	3.90548355722037e-09	1.03063186617993e-06	vargiu
2550	26.4201612710217	1.25236077254218	0.228575180183378	5.47898845157839	4.27764277928338e-08	8.41989561694224e-06	vargiu
3200	14.4113525783611	3.78940663657166	0.554665113202563	6.83188206067645	8.38077408757367e-12	4.69837839074283e-09	vargiu
3503	80.5989340297771	3.03027809847251	0.374448525530776	8.09264262471627	5.83839752210781e-16	1.14465576730048e-12	vargiu
3937	44.4115131305786	1.29579674414772	0.184455749663141	7.02497345034859	2.14106956878455e-12	1.42609205712018e-09	vargiu
4378	10.2685882194696	2.97019918627836	0.362662229752152	8.18998765961439	2.61252963244846e-16	5.71252300310065e-13	vargiu
4426	36.8550382044513	1.22174986726278	0.2094411428115	5.8333804469467	5.43155289698933e-09	1.37882771493287e-06	vargiu
4443	31.711893965144	1.07540890348469	0.215301330753799	4.99490133070494	5.88658558762213e-07	8.25692372925074e-05	vargiu
4699	3.67418493910193	2.41965424975127	0.503458412848966	4.80606578020805	1.5392927162267e-06	0.00019063717287116	vargiu
4713	592.22015869179	1.17563840612047	0.234851907043527	5.00587123570849	5.56099237869305e-07	7.86379615017956e-05	vargiu
4731	3.39838756915366	2.89985140586106	0.706285759659205	4.10577640310955	4.02959123504038e-05	0.00323392402956455	vargiu
4842	1.31865172366661	3.02471379909283	0.764472289007601	3.95660358470201	7.60229313461772e-05	0.00559166545903994	vargiu
5481	3.91001318932488	1.73973855332975	0.452720702534457	3.84285177061753	0.000121612924664355	0.0083386913884656	vargiu
565	130.531351610853	2.86139895841535	0.323785337754039	8.83733333406526	9.80303250332064e-19	4.09861245699076e-15	vargiu
6072	52.0995300724513	1.17533741712555	0.229985736696917	5.11047960628293	3.2134199976365e-07	4.89302767696279e-05	vargiu
6255	10.1785682409606	2.04268390043575	0.487648761786079	4.18884258611494	2.80380795881124e-05	0.00237257709556624	vargiu
6262	93.1004172121393	2.36532746050728	0.340053079057058	6.95575957455277	3.50667460990767e-12	2.20850494216e-09	vargiu
